# Supplementary material
Source: PubMed Central journal article supplement (PMC8895433)
Supplement: NIHMS1069212-supplement-supplemental_file.pdf [file NIHMS1069212-supplement-supplemental_file.pdf]

# Supplemental Figure S1

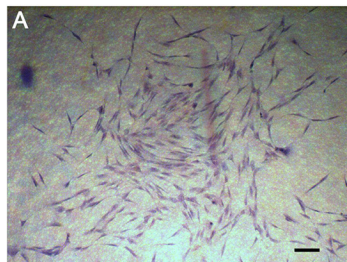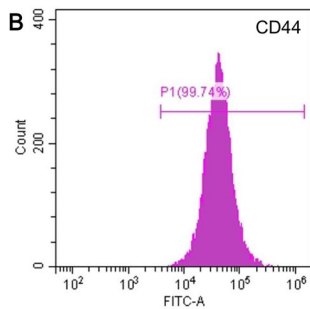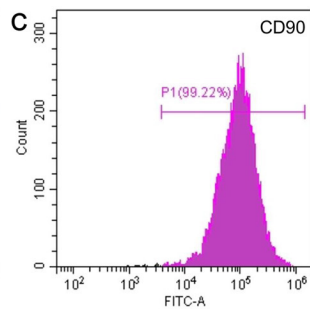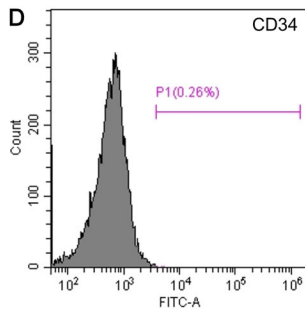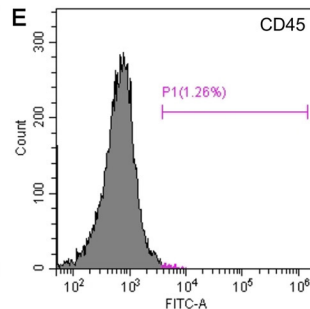

Supplemental Figure S2

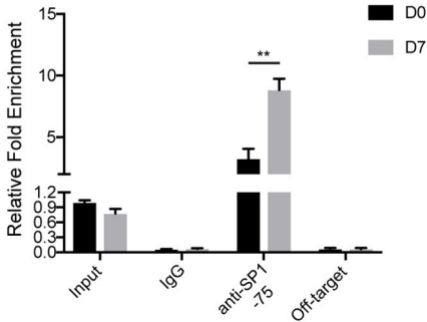

**Supplemental Figure S1.** Characterization of hDPCs. Colony forming assay was carried out by culturing a single cell and after 6 days a colony-like growth was observed (A). Flow cytometry assay were performed to test surface markers of hDPCs as mesenchymal stem cell markers like CD44 and CD90 were dominantly positive in hDPCs population while CD34 and CD45, which are hematopoietic markers, showed negative signals (B, C, D, E). Scale bar in panel A represent 200  $\mu\text{m}$

**Supplemental Figure S2.** ChIP-qPCR validating SP1 binding near 75 bp upstream of TSS of *KLF4* in the lysates collected from human dental pulp cells day 0 and day7 after odontoblastic induction. n=3 for each group, data represent means $\pm$ s.d., t-test, \*\*P<0.01.

**Table S1 D0- and D9-specific hypermethylated regions**

| <b>D0 enriched hypermethylated regions</b> |              |            | <b>D9 enriched hypermethylated regions</b> |              |            |
|--------------------------------------------|--------------|------------|--------------------------------------------|--------------|------------|
| <b>chr</b>                                 | <b>start</b> | <b>end</b> | <b>chr</b>                                 | <b>start</b> | <b>end</b> |
| chrY_random                                | 3258809      | 3259265    | chrY                                       | 346497       | 346807     |
| chrY_random                                | 6343016      | 6343265    | chrY                                       | 795725       | 796779     |
| chrY_random                                | 6908709      | 6908958    | chrY                                       | 1396858      | 1397207    |
| chr8_random                                | 164011       | 164211     | chrX                                       | 5447284      | 5447533    |
| chr8_random                                | 164673       | 164964     | chrX                                       | 6299774      | 6299930    |
| chrY                                       | 154955       | 155055     | chrX                                       | 7038640      | 7038874    |
| chrY                                       | 346956       | 347256     | chrX                                       | 7635426      | 7635875    |
| chrY                                       | 2057348      | 2057804    | chrX                                       | 7654774      | 7655725    |
| chrX                                       | 5447584      | 5447836    | chrX                                       | 7719790      | 7719991    |
| chrX                                       | 6025566      | 6025866    | chrX                                       | 7819135      | 7819335    |
| chrX                                       | 6062530      | 6062731    | chrX                                       | 7838641      | 7838741    |
| chrX                                       | 6152200      | 6152700    | chrX                                       | 7875298      | 7875398    |
| chrX                                       | 7039323      | 7039629    | chrX                                       | 7896839      | 7896939    |
| chrX                                       | 7372619      | 7373019    | chrX                                       | 7917319      | 7917568    |
| chrX                                       | 7373668      | 7373768    | chrX                                       | 8093695      | 8093795    |
| chrX                                       | 7571762      | 7572065    | chrX                                       | 8094144      | 8094344    |
| chrX                                       | 7597724      | 7598024    | chrX                                       | 8173374      | 8173523    |
| chrX                                       | 7598273      | 7598473    | chrX                                       | 8249199      | 8249348    |
| chrX                                       | 7635926      | 7636375    | chrX                                       | 8249599      | 8249748    |
| chrX                                       | 7654325      | 7654425    | chrX                                       | 9196965      | 9197065    |
| chrX                                       | 7655874      | 7655974    | chrX                                       | 10114654     | 10114754   |
| chrX                                       | 7677840      | 7678089    | chrX                                       | 10115605     | 10115705   |
| chrX                                       | 7694705      | 7694854    | chrX                                       | 10115756     | 10116008   |
| chrX                                       | 7719441      | 7719641    | chrX                                       | 10213506     | 10213706   |
| chrX                                       | 7724512      | 7725263    | chrX                                       | 12078910     | 12079310   |
| chrX                                       | 7726112      | 7726312    | chrX                                       | 13068029     | 13068229   |
| chrX                                       | 7738117      | 7738366    | chrX                                       | 13278134     | 13278783   |
| chrX                                       | 7759009      | 7759509    | chrX                                       | 13844398     | 13844499   |
| chrX                                       | 7820835      | 7821135    | chrX                                       | 16615793     | 16615893   |
| chrX                                       | 7821284      | 7821584    | chrX                                       | 16616042     | 16616093   |
| chrX                                       | 7881436      | 7881536    | chrX                                       | 16616342     | 16616845   |
| chrX                                       | 7881785      | 7881985    | chrX                                       | 18142992     | 18143092   |
| chrX                                       | 7895790      | 7896790    | chrX                                       | 18159359     | 18159459   |
| chrX                                       | 7916819      | 7917168    | chrX                                       | 19478765     | 19478861   |
| chrX                                       | 7944537      | 7944837    | chrX                                       | 21059196     | 21059545   |
| chrX                                       | 7945386      | 7945686    | chrX                                       | 35245469     | 35245623   |
| chrX                                       | 7965057      | 7965463    | chrX                                       | 35246370     | 35246470   |
| chrX                                       | 8015285      | 8015634    | chrX                                       | 35522610     | 35522811   |
| chrX                                       | 8072328      | 8072628    | chrX                                       | 35696389     | 35696689   |
| chrX                                       | 8129231      | 8129431    | chrX                                       | 35733229     | 35733529   |

|      |          |          |      |          |          |
|------|----------|----------|------|----------|----------|
| chrX | 8130080  | 8130391  | chrX | 35733678 | 35733729 |
| chrX | 8142939  | 8143039  | chrX | 35758716 | 35759016 |
| chrX | 8173223  | 8173323  | chrX | 36340471 | 36341320 |
| chrX | 8203300  | 8203849  | chrX | 36527901 | 36528001 |
| chrX | 8889474  | 8889788  | chrX | 36546817 | 36546917 |
| chrX | 9058982  | 9059182  | chrX | 36713824 | 36714878 |
| chrX | 9280558  | 9281058  | chrX | 36918054 | 36918356 |
| chrX | 10481157 | 10481357 | chrX | 37037723 | 37037880 |
| chrX | 12670339 | 12670588 | chrX | 39863440 | 39863689 |
| chrX | 12759515 | 12759615 | chrX | 46354095 | 46354395 |
| chrX | 15108284 | 15108535 | chrX | 46355746 | 46356200 |
| chrX | 16520264 | 16520413 | chrX | 46828800 | 46828900 |
| chrX | 20056662 | 20056862 | chrX | 47085404 | 47085753 |
| chrX | 20289306 | 20289506 | chrX | 47749669 | 47749818 |
| chrX | 20362100 | 20362249 | chrX | 48259340 | 48259640 |
| chrX | 20545510 | 20545759 | chrX | 51076197 | 51076297 |
| chrX | 20615496 | 20615696 | chrX | 51449563 | 51449863 |
| chrX | 20655728 | 20655877 | chrX | 51576632 | 51577381 |
| chrX | 20685085 | 20685585 | chrX | 51730858 | 51730958 |
| chrX | 20686134 | 20686234 | chrX | 51731607 | 51731707 |
| chrX | 20701224 | 20701424 | chrX | 54371951 | 54372051 |
| chrX | 20845990 | 20846339 | chrX | 54372200 | 54372500 |
| chrX | 20867831 | 20867988 | chrX | 54534184 | 54534384 |
| chrX | 20918238 | 20918438 | chrX | 54534533 | 54534633 |
| chrX | 20947486 | 20947935 | chrX | 55213533 | 55213633 |
| chrX | 20958771 | 20958871 | chrX | 59138390 | 59138490 |
| chrX | 25967957 | 25968407 | chrX | 59140139 | 59140339 |
| chrX | 27937745 | 27938394 | chrX | 67007518 | 67007667 |
| chrX | 34844532 | 34844732 | chrX | 67007818 | 67007967 |
| chrX | 34844881 | 34844981 | chrX | 69610455 | 69610755 |
| chrX | 34976953 | 34977102 | chrX | 69909809 | 69910009 |
| chrX | 35443796 | 35443996 | chrX | 70169895 | 70170195 |
| chrX | 35550944 | 35551044 | chrX | 70170350 | 70170595 |
| chrX | 35551193 | 35551344 | chrX | 70512279 | 70512379 |
| chrX | 35637502 | 35637702 | chrX | 71063542 | 71063842 |
| chrX | 35638251 | 35638551 | chrX | 71155778 | 71156278 |
| chrX | 35733778 | 35734278 | chrX | 71302719 | 71302819 |
| chrX | 35775465 | 35775665 | chrX | 71386908 | 71387008 |
| chrX | 35838787 | 35840089 | chrX | 71466163 | 71466363 |
| chrX | 35840440 | 35840738 | chrX | 71673288 | 71673437 |
| chrX | 35859086 | 35859186 | chrX | 71740743 | 71741043 |
| chrX | 35892736 | 35892936 | chrX | 71911007 | 71911107 |
| chrX | 35913219 | 35913419 | chrX | 71955203 | 71955354 |

|      |          |          |      |           |           |
|------|----------|----------|------|-----------|-----------|
| chrX | 35954876 | 35955076 | chrX | 71955503  | 71955803  |
| chrX | 36002602 | 36003002 | chrX | 72508414  | 72508563  |
| chrX | 36003751 | 36003851 | chrX | 72508914  | 72509064  |
| chrX | 36036793 | 36037093 | chrX | 72566356  | 72566856  |
| chrX | 36079912 | 36080012 | chrX | 72567214  | 72567314  |
| chrX | 36130243 | 36130543 | chrX | 72605985  | 72606085  |
| chrX | 36131193 | 36131297 | chrX | 72606634  | 72606934  |
| chrX | 36173984 | 36174084 | chrX | 72630981  | 72631081  |
| chrX | 36174733 | 36175033 | chrX | 72666561  | 72666661  |
| chrX | 36184490 | 36184693 | chrX | 72667110  | 72667310  |
| chrX | 36287681 | 36288181 | chrX | 73322446  | 73322846  |
| chrX | 36293412 | 36293565 | chrX | 73369008  | 73369357  |
| chrX | 36364046 | 36364446 | chrX | 76034268  | 76034368  |
| chrX | 36777395 | 36777795 | chrX | 79308305  | 79308605  |
| chrX | 37234509 | 37234758 | chrX | 84015191  | 84015601  |
| chrX | 42830118 | 42830218 | chrX | 87647648  | 87647797  |
| chrX | 43251827 | 43252027 | chrX | 92604228  | 92604930  |
| chrX | 46496610 | 46497716 | chrX | 92873933  | 92874033  |
| chrX | 46607753 | 46608302 | chrX | 93214441  | 93214590  |
| chrX | 46670159 | 46670359 | chrX | 93632283  | 93632483  |
| chrX | 46829049 | 46829300 | chrX | 93632632  | 93632932  |
| chrX | 46974653 | 46974753 | chrX | 94283803  | 94283952  |
| chrX | 46975302 | 46975826 | chrX | 96336908  | 96337157  |
| chrX | 46980496 | 46980596 | chrX | 97078793  | 97078993  |
| chrX | 47135485 | 47135634 | chrX | 97124604  | 97124704  |
| chrX | 47156730 | 47156830 | chrX | 97658131  | 97658780  |
| chrX | 49302562 | 49302862 | chrX | 98163613  | 98164013  |
| chrX | 50143056 | 50144156 | chrX | 98600321  | 98600570  |
| chrX | 50627328 | 50627528 | chrX | 98813814  | 98814114  |
| chrX | 51373492 | 51373792 | chrX | 98955305  | 98955554  |
| chrX | 51832168 | 51832368 | chrX | 99273711  | 99273860  |
| chrX | 52019760 | 52019860 | chrX | 99409949  | 99410049  |
| chrX | 52054958 | 52055009 | chrX | 99410598  | 99411198  |
| chrX | 52055158 | 52055358 | chrX | 99461752  | 99461952  |
| chrX | 52081635 | 52081884 | chrX | 100259104 | 100259204 |
| chrX | 52188370 | 52188482 | chrX | 100260804 | 100261104 |
| chrX | 54506171 | 54507696 | chrX | 100831601 | 100831701 |
| chrX | 54756989 | 54757089 | chrX | 100895066 | 100895266 |
| chrX | 54769323 | 54769623 | chrX | 101096429 | 101096529 |
| chrX | 54769772 | 54769872 | chrX | 101097278 | 101097378 |
| chrX | 54981361 | 54981412 | chrX | 102010678 | 102010778 |
| chrX | 55212884 | 55212984 | chrX | 102169292 | 102169943 |
| chrX | 56189712 | 56189812 | chrX | 102170538 | 102170635 |

|      |          |          |      |           |           |
|------|----------|----------|------|-----------|-----------|
| chrX | 58650518 | 58650618 | chrX | 103044615 | 103044815 |
| chrX | 59139739 | 59139790 | chrX | 103044964 | 103045064 |
| chrX | 59955198 | 59955498 | chrX | 103267570 | 103267819 |
| chrX | 62419146 | 62419696 | chrX | 103308279 | 103308479 |
| chrX | 62522630 | 62522830 | chrX | 103950999 | 103951199 |
| chrX | 67605815 | 67606015 | chrX | 104199784 | 104199984 |
| chrX | 68610169 | 68610618 | chrX | 104374482 | 104374731 |
| chrX | 68722337 | 68722437 | chrX | 104409241 | 104409546 |
| chrX | 69738439 | 69738888 | chrX | 107201820 | 107202069 |
| chrX | 69800086 | 69800535 | chrX | 109006388 | 109006588 |
| chrX | 69801286 | 69801386 | chrX | 114557817 | 114557970 |
| chrX | 69907560 | 69907809 | chrX | 118035569 | 118035921 |
| chrX | 69908860 | 69909160 | chrX | 118037385 | 118037834 |
| chrX | 70170750 | 70170854 | chrX | 127472320 | 127472420 |
| chrX | 70512728 | 70512828 | chrX | 131620677 | 131621126 |
| chrX | 71063093 | 71063193 | chrX | 131884242 | 131885142 |
| chrX | 71156327 | 71156627 | chrX | 132199459 | 132199560 |
| chrX | 71302070 | 71302170 | chrX | 132264592 | 132264692 |
| chrX | 71359073 | 71359722 | chrX | 132440502 | 132440751 |
| chrX | 71452022 | 71452122 | chrX | 133095497 | 133095697 |
| chrX | 71481434 | 71481734 | chrX | 133755780 | 133755880 |
| chrX | 71504414 | 71504517 | chrX | 133756229 | 133756529 |
| chrX | 71580492 | 71580592 | chrX | 133894568 | 133894771 |
| chrX | 71696487 | 71697136 | chrX | 133926067 | 133926918 |
| chrX | 71721601 | 71721950 | chrX | 134389166 | 134389515 |
| chrX | 71739043 | 71739101 | chrX | 134463595 | 134463995 |
| chrX | 71739343 | 71739692 | chrX | 134591254 | 134591403 |
| chrX | 71875398 | 71875947 | chrX | 134715717 | 134716017 |
| chrX | 71876598 | 71877298 | chrX | 134843235 | 134843334 |
| chrX | 71898035 | 71898135 | chrX | 137055296 | 137055696 |
| chrX | 71911456 | 71911556 | chrX | 137523741 | 137523890 |
| chrX | 71953654 | 71953854 | chrX | 137595817 | 137596222 |
| chrX | 72012679 | 72012828 | chrX | 137720765 | 137721014 |
| chrX | 72024219 | 72024419 | chrX | 137783592 | 137783792 |
| chrX | 72062876 | 72063076 | chrX | 138387718 | 138388118 |
| chrX | 72129359 | 72130308 | chrX | 139848924 | 139849183 |
| chrX | 72159371 | 72159471 | chrX | 140012753 | 140012853 |
| chrX | 72159620 | 72159771 | chrX | 140013402 | 140014009 |
| chrX | 72160020 | 72160424 | chrX | 140303335 | 140303845 |
| chrX | 72161071 | 72161220 | chrX | 141016402 | 141016502 |
| chrX | 72261628 | 72262035 | chrX | 141450213 | 141450467 |
| chrX | 72323600 | 72323800 | chrX | 144584130 | 144584279 |
| chrX | 72414571 | 72414771 | chrX | 144585537 | 144585686 |

|      |           |           |       |           |           |
|------|-----------|-----------|-------|-----------|-----------|
| chrX | 72492496  | 72492796  | chrX  | 148185269 | 148185918 |
| chrX | 72493045  | 72493245  | chrX  | 148545618 | 148546067 |
| chrX | 72520719  | 72520968  | chrX  | 148574402 | 148574502 |
| chrX | 72535103  | 72535303  | chrX  | 148624488 | 148625142 |
| chrX | 72550690  | 72550790  | chrX  | 149048560 | 149048799 |
| chrX | 72591076  | 72591645  | chrX  | 149331296 | 149331596 |
| chrX | 72610714  | 72610914  | chrX  | 149705678 | 149705827 |
| chrX | 72611063  | 72611163  | chrX  | 149707678 | 149707827 |
| chrX | 73322895  | 73322995  | chrX  | 149761741 | 149761941 |
| chrX | 73334074  | 73334323  | chrX  | 149871103 | 149871203 |
| chrX | 73654358  | 73654807  | chrX  | 150565222 | 150565522 |
| chrX | 74111997  | 74112146  | chrX  | 150565671 | 150566175 |
| chrX | 75749435  | 75749635  | chrX  | 152523720 | 152524020 |
| chrX | 81726332  | 81726539  | chrX  | 152524369 | 152524769 |
| chrX | 83811480  | 83811580  | chrX  | 152561162 | 152561611 |
| chrX | 84014242  | 84014642  | chrX  | 155130350 | 155130682 |
| chrX | 84430033  | 84430182  | chrX  | 155230976 | 155231231 |
| chrX | 84494727  | 84494833  | chrX  | 158033448 | 158033748 |
| chrX | 87647148  | 87647497  | chrX  | 160361207 | 160361307 |
| chrX | 91523453  | 91523653  | chrX  | 160420343 | 160420447 |
| chrX | 91524004  | 91524954  | chrX  | 160432063 | 160432212 |
| chrX | 91869614  | 91869814  | chrX  | 161490497 | 161490797 |
| chrX | 91870163  | 91870263  | chrX  | 161607608 | 161607708 |
| chrX | 92206621  | 92207070  | chrX  | 161621245 | 161621645 |
| chrX | 92780583  | 92780783  | chrX  | 161621894 | 161621997 |
| chrX | 93899936  | 93900085  | chrX  | 161951374 | 161951474 |
| chrX | 94144867  | 94145067  | chrX  | 163702353 | 163702602 |
| chrX | 97323488  | 97323788  | chrX  | 163770330 | 163770530 |
| chrX | 98162864  | 98163464  | chrX  | 163972059 | 163972359 |
| chrX | 98681914  | 98682263  | chrX  | 163972508 | 163972559 |
| chrX | 98782328  | 98782777  | chrX  | 164117424 | 164117724 |
| chrX | 98814363  | 98814463  | chrX  | 164914407 | 164914507 |
| chrX | 98955605  | 98956005  | chrX  | 166326859 | 166327308 |
| chrX | 99442752  | 99442852  | chr13 | 3537641   | 3537841   |
| chrX | 99452851  | 99453000  | chr13 | 3837102   | 3837551   |
| chrX | 99462301  | 99462501  | chr13 | 4607881   | 4607981   |
| chrX | 99486868  | 99487617  | chr13 | 4608330   | 4608530   |
| chrX | 99608908  | 99609208  | chr13 | 5860738   | 5860887   |
| chrX | 99609466  | 99609757  | chr13 | 6647970   | 6648219   |
| chrX | 99617274  | 99617474  | chr13 | 8995158   | 8995307   |
| chrX | 99921906  | 99923059  | chr13 | 12695192  | 12695292  |
| chrX | 100260555 | 100260655 | chr13 | 13785495  | 13785695  |
| chrX | 100377165 | 100377314 | chr13 | 13786044  | 13786144  |



|      |           |           |       |          |          |
|------|-----------|-----------|-------|----------|----------|
| chrX | 100440479 | 100440577 | chr13 | 13982716 | 13983116 |
| chrX | 100895615 | 100896015 | chr13 | 14176346 | 14176546 |
| chrX | 101601240 | 101601340 | chr13 | 14455599 | 14456399 |
| chrX | 102009518 | 102010118 | chr13 | 14457148 | 14457248 |
| chrX | 102858711 | 102859011 | chr13 | 18093053 | 18093353 |
| chrX | 103688096 | 103688196 | chr13 | 18094002 | 18094103 |
| chrX | 104117050 | 104117150 | chr13 | 18120504 | 18120604 |
| chrX | 104199335 | 104199535 | chr13 | 18169275 | 18169630 |
| chrX | 104374782 | 104375331 | chr13 | 19124992 | 19125092 |
| chrX | 104407292 | 104407392 | chr13 | 19796025 | 19796225 |
| chrX | 104673288 | 104673488 | chr13 | 19799315 | 19799415 |
| chrX | 104673637 | 104673737 | chr13 | 21624115 | 21624415 |
| chrX | 105591468 | 105591668 | chr13 | 21815294 | 21815847 |
| chrX | 106004289 | 106004795 | chr13 | 21879275 | 21879375 |
| chrX | 106136395 | 106137744 | chr13 | 21894194 | 21894343 |
| chrX | 111408532 | 111408632 | chr13 | 21956427 | 21956976 |
| chrX | 111408781 | 111408981 | chr13 | 21963193 | 21963942 |
| chrX | 131703997 | 131704297 | chr13 | 22210259 | 22210608 |
| chrX | 131704446 | 131704546 | chr13 | 22218825 | 22219674 |
| chrX | 131705297 | 131705552 | chr13 | 23545442 | 23545691 |
| chrX | 131781784 | 131781884 | chr13 | 23731616 | 23731765 |
| chrX | 131885291 | 131885591 | chr13 | 23750268 | 23751324 |
| chrX | 132127054 | 132127203 | chr13 | 23798397 | 23798546 |
| chrX | 132263843 | 132264043 | chr13 | 23871283 | 23871383 |
| chrX | 132308430 | 132308579 | chr13 | 23871932 | 23872532 |
| chrX | 132473726 | 132474175 | chr13 | 23886584 | 23886733 |
| chrX | 132479110 | 132479310 | chr13 | 23914979 | 23915179 |
| chrX | 132479459 | 132479759 | chr13 | 23937830 | 23938279 |
| chrX | 132687625 | 132687719 | chr13 | 23982848 | 23983352 |
| chrX | 133443589 | 133443838 | chr13 | 24166987 | 24167336 |
| chrX | 133716136 | 133716336 | chr13 | 24168501 | 24168958 |
| chrX | 133807469 | 133807619 | chr13 | 24456568 | 24456768 |
| chrX | 133861661 | 133861761 | chr13 | 24457317 | 24457617 |
| chrX | 133862110 | 133862210 | chr13 | 24977529 | 24977829 |
| chrX | 133938076 | 133938476 | chr13 | 24978278 | 24978378 |
| chrX | 134464670 | 134465072 | chr13 | 25007678 | 25007878 |
| chrX | 134714668 | 134714968 | chr13 | 25113434 | 25113683 |
| chrX | 134842685 | 134842785 | chr13 | 25198008 | 25198153 |
| chrX | 134843689 | 134843989 | chr13 | 25232576 | 25232725 |
| chrX | 134844143 | 134844446 | chr13 | 26946341 | 26946641 |
| chrX | 135292411 | 135292711 | chr13 | 29131155 | 29131255 |
| chrX | 135293609 | 135294158 | chr13 | 29131404 | 29131812 |
| chrX | 136637467 | 136637667 | chr13 | 30512332 | 30512881 |

|      |           |           |       |          |          |
|------|-----------|-----------|-------|----------|----------|
| chrX | 137333233 | 137333333 | chr13 | 30721542 | 30721642 |
| chrX | 137595617 | 137595768 | chr13 | 30924230 | 30924330 |
| chrX | 137785336 | 137785537 | chr13 | 31124096 | 31124604 |
| chrX | 138179226 | 138179526 | chr13 | 31734458 | 31734558 |
| chrX | 138535647 | 138535747 | chr13 | 31801958 | 31802058 |
| chrX | 139348184 | 139348784 | chr13 | 34111969 | 34112118 |
| chrX | 139928565 | 139928865 | chr13 | 34213913 | 34214362 |
| chrX | 140589695 | 140589995 | chr13 | 34254110 | 34254210 |
| chrX | 141016651 | 141016802 | chr13 | 34829293 | 34829593 |
| chrX | 141016951 | 141017051 | chr13 | 35051776 | 35051976 |
| chrX | 141287262 | 141287362 | chr13 | 35139756 | 35140156 |
| chrX | 141939087 | 141939591 | chr13 | 35169889 | 35170038 |
| chrX | 141940746 | 141941195 | chr13 | 36293932 | 36293983 |
| chrX | 143110413 | 143110513 | chr13 | 38064305 | 38064405 |
| chrX | 144583730 | 144583979 | chr13 | 38211766 | 38212066 |
| chrX | 144585136 | 144585285 | chr13 | 38381410 | 38381659 |
| chrX | 147122970 | 147123070 | chr13 | 38521387 | 38521587 |
| chrX | 148116019 | 148116419 | chr13 | 38811633 | 38811901 |
| chrX | 148116668 | 148116968 | chr13 | 38812145 | 38812400 |
| chrX | 148342352 | 148342501 | chr13 | 38835231 | 38835836 |
| chrX | 148872409 | 148872509 | chr13 | 40915606 | 40915806 |
| chrX | 149544704 | 149544804 | chr13 | 41097597 | 41097697 |
| chrX | 149896881 | 149897181 | chr13 | 42235128 | 42235728 |
| chrX | 149897330 | 149897630 | chr13 | 42479590 | 42479690 |
| chrX | 150668618 | 150668818 | chr13 | 43483887 | 43484838 |
| chrX | 150764814 | 150765014 | chr13 | 43485587 | 43485898 |
| chrX | 150766302 | 150766702 | chr13 | 43661288 | 43661388 |
| chrX | 151026204 | 151026404 | chr13 | 43662139 | 43662293 |
| chrX | 151086682 | 151087182 | chr13 | 45182011 | 45182111 |
| chrX | 151360462 | 151361111 | chr13 | 45568407 | 45568556 |
| chrX | 152465257 | 152465657 | chr13 | 45687034 | 45687483 |
| chrX | 152590723 | 152591323 | chr13 | 46849287 | 46849387 |
| chrX | 152867624 | 152867924 | chr13 | 46907802 | 46907902 |
| chrX | 152868277 | 152868673 | chr13 | 47109933 | 47110033 |
| chrX | 155023293 | 155024542 | chr13 | 47110984 | 47111138 |
| chrX | 155129901 | 155130001 | chr13 | 47194635 | 47194835 |
| chrX | 156785878 | 156787178 | chr13 | 47302500 | 47302800 |
| chrX | 156788227 | 156788327 | chr13 | 48692885 | 48693234 |
| chrX | 156903709 | 156903809 | chr13 | 48803974 | 48804074 |
| chrX | 157670144 | 157670244 | chr13 | 48804523 | 48804623 |
| chrX | 158033797 | 158033848 | chr13 | 48842344 | 48842544 |
| chrX | 158034297 | 158034397 | chr13 | 49326313 | 49326413 |
| chrX | 159248685 | 159248885 | chr13 | 49394876 | 49394976 |

|       |           |           |       |          |          |
|-------|-----------|-----------|-------|----------|----------|
| chrX  | 160291517 | 160291917 | chr13 | 49831432 | 49831881 |
| chrX  | 160433393 | 160433493 | chr13 | 51347665 | 51347814 |
| chrX  | 161292837 | 161293037 | chr13 | 51349165 | 51349265 |
| chrX  | 161440218 | 161440418 | chr13 | 51586405 | 51586605 |
| chrX  | 161608457 | 161608557 | chr13 | 51586854 | 51587458 |
| chrX  | 161789752 | 161789901 | chr13 | 51822380 | 51822529 |
| chrX  | 161801198 | 161801347 | chr13 | 51822980 | 51823280 |
| chrX  | 162511771 | 162512020 | chr13 | 52708460 | 52708560 |
| chrX  | 164011504 | 164011704 | chr13 | 52709560 | 52710013 |
| chrX  | 164041737 | 164041837 | chr13 | 53108016 | 53108116 |
| chrX  | 164116975 | 164117075 | chr13 | 53159994 | 53160094 |
| chrX  | 166206110 | 166206310 | chr13 | 54252985 | 54253434 |
| chr13 | 3536992   | 3537092   | chr13 | 54662068 | 54662372 |
| chr13 | 3633260   | 3633409   | chr13 | 54768473 | 54768622 |
| chr13 | 4572220   | 4572371   | chr13 | 54804521 | 54804621 |
| chr13 | 5860438   | 5860587   | chr13 | 54814618 | 54814918 |
| chr13 | 6546402   | 6546651   | chr13 | 54887385 | 54887685 |
| chr13 | 8870388   | 8870537   | chr13 | 54894290 | 54894390 |
| chr13 | 12524375  | 12524533  | chr13 | 54894839 | 54894939 |
| chr13 | 12649302  | 12650051  | chr13 | 54942918 | 54943018 |
| chr13 | 13829314  | 13830463  | chr13 | 54959689 | 54960389 |
| chr13 | 14346581  | 14346781  | chr13 | 54981960 | 54982160 |
| chr13 | 19124743  | 19124943  | chr13 | 54982809 | 54983009 |
| chr13 | 19908724  | 19909324  | chr13 | 55522982 | 55523033 |
| chr13 | 20361297  | 20361446  | chr13 | 55523182 | 55523282 |
| chr13 | 20648265  | 20648565  | chr13 | 55555383 | 55555732 |
| chr13 | 21356434  | 21356534  | chr13 | 55638160 | 55638360 |
| chr13 | 21617174  | 21617474  | chr13 | 55663524 | 55663873 |
| chr13 | 21617839  | 21617931  | chr13 | 55721938 | 55722638 |
| chr13 | 21624564  | 21624664  | chr13 | 55729212 | 55729661 |
| chr13 | 21787740  | 21787989  | chr13 | 55815959 | 55816110 |
| chr13 | 21850964  | 21851373  | chr13 | 55816259 | 55816459 |
| chr13 | 22121024  | 22121573  | chr13 | 55827882 | 55828182 |
| chr13 | 24591643  | 24591843  | chr13 | 55920105 | 55920205 |
| chr13 | 24937630  | 24937730  | chr13 | 55920354 | 55920654 |
| chr13 | 24937979  | 24938179  | chr13 | 56024025 | 56024225 |
| chr13 | 25119193  | 25119393  | chr13 | 56328864 | 56328964 |
| chr13 | 25119542  | 25119942  | chr13 | 56715456 | 56715956 |
| chr13 | 25198402  | 25198602  | chr13 | 56802451 | 56802551 |
| chr13 | 25446222  | 25446671  | chr13 | 58385482 | 58385776 |
| chr13 | 30313011  | 30313111  | chr13 | 58386327 | 58386476 |
| chr13 | 30924588  | 30924779  | chr13 | 58594484 | 58594584 |
| chr13 | 31150142  | 31150591  | chr13 | 58998294 | 58998394 |

|       |          |          |       |          |          |
|-------|----------|----------|-------|----------|----------|
| chr13 | 31733109 | 31734209 | chr13 | 59000694 | 59000994 |
| chr13 | 31982518 | 31982718 | chr13 | 59778332 | 59778432 |
| chr13 | 32514317 | 32514417 | chr13 | 59868483 | 59868932 |
| chr13 | 32514966 | 32515066 | chr13 | 59889000 | 59889149 |
| chr13 | 32978110 | 32978310 | chr13 | 59925251 | 59925551 |
| chr13 | 33140134 | 33140185 | chr13 | 59963137 | 59963537 |
| chr13 | 33140639 | 33140734 | chr13 | 60993198 | 60993306 |
| chr13 | 34141054 | 34141203 | chr13 | 63051771 | 63051862 |
| chr13 | 34253861 | 34253961 | chr13 | 63081482 | 63081682 |
| chr13 | 34254361 | 34256210 | chr13 | 63624619 | 63625476 |
| chr13 | 34522404 | 34522616 | chr13 | 64008987 | 64009196 |
| chr13 | 35140205 | 35140505 | chr13 | 64282180 | 64282280 |
| chr13 | 36082920 | 36083076 | chr13 | 64355117 | 64355217 |
| chr13 | 36293683 | 36293783 | chr13 | 64463169 | 64463964 |
| chr13 | 36911128 | 36911277 | chr13 | 64501235 | 64501535 |
| chr13 | 36912528 | 36912677 | chr13 | 64501784 | 64501894 |
| chr13 | 37521816 | 37522069 | chr13 | 64620177 | 64620826 |
| chr13 | 38064954 | 38065054 | chr13 | 65300269 | 65300818 |
| chr13 | 38212315 | 38212515 | chr13 | 65338850 | 65339204 |
| chr13 | 38213394 | 38213843 | chr13 | 66864599 | 66864848 |
| chr13 | 38704681 | 38705632 | chr13 | 68392527 | 68392976 |
| chr13 | 38705789 | 38706081 | chr13 | 69345373 | 69345473 |
| chr13 | 39136304 | 39136553 | chr13 | 69354356 | 69354656 |
| chr13 | 40548188 | 40548590 | chr13 | 69422476 | 69422576 |
| chr13 | 41097746 | 41097846 | chr13 | 73069196 | 73069496 |
| chr13 | 41249872 | 41251023 | chr13 | 73276219 | 73276419 |
| chr13 | 41399657 | 41399857 | chr13 | 73656355 | 73656555 |
| chr13 | 41400406 | 41400506 | chr13 | 73818171 | 73818371 |
| chr13 | 41666851 | 41667000 | chr13 | 73818720 | 73818820 |
| chr13 | 41828606 | 41828806 | chr13 | 74100803 | 74100953 |
| chr13 | 41828964 | 41829006 | chr13 | 76192954 | 76193054 |
| chr13 | 41829255 | 41829655 | chr13 | 81433258 | 81433407 |
| chr13 | 42027552 | 42027701 | chr13 | 81458169 | 81458469 |
| chr13 | 42234779 | 42235079 | chr13 | 81511777 | 81511877 |
| chr13 | 43302304 | 43302404 | chr13 | 81512426 | 81512526 |
| chr13 | 43576411 | 43577211 | chr13 | 84995376 | 84995476 |
| chr13 | 43578063 | 43578263 | chr13 | 85062764 | 85063119 |
| chr13 | 43795646 | 43796200 | chr13 | 88625821 | 88626421 |
| chr13 | 43964568 | 43964868 | chr13 | 89894939 | 89895088 |
| chr13 | 44910639 | 44910843 | chr13 | 90728550 | 90728599 |
| chr13 | 46144642 | 46145042 | chr13 | 91012904 | 91013057 |
| chr13 | 46145591 | 46145691 | chr13 | 91612132 | 91612632 |
| chr13 | 46681861 | 46682061 | chr13 | 91612781 | 91612881 |

|       |          |          |       |           |           |
|-------|----------|----------|-------|-----------|-----------|
| chr13 | 47223035 | 47223135 | chr13 | 92969667  | 92969767  |
| chr13 | 47224789 | 47224889 | chr13 | 92970216  | 92970316  |
| chr13 | 47302849 | 47302949 | chr13 | 93233715  | 93233864  |
| chr13 | 48439727 | 48440027 | chr13 | 93512260  | 93512712  |
| chr13 | 48692070 | 48692319 | chr13 | 93631240  | 93631739  |
| chr13 | 48841295 | 48841495 | chr13 | 93742899  | 93742999  |
| chr13 | 49050033 | 49050133 | chr13 | 94076415  | 94076515  |
| chr13 | 49082324 | 49082573 | chr13 | 94077470  | 94077674  |
| chr13 | 49365147 | 49365547 | chr13 | 94210824  | 94210924  |
| chr13 | 49426464 | 49426564 | chr13 | 94495352  | 94495701  |
| chr13 | 49426913 | 49427013 | chr13 | 95312937  | 95314437  |
| chr13 | 49487709 | 49487958 | chr13 | 95314891  | 95315086  |
| chr13 | 49489609 | 49489858 | chr13 | 95885232  | 95885632  |
| chr13 | 49599713 | 49599813 | chr13 | 97109559  | 97109759  |
| chr13 | 49833232 | 49833483 | chr13 | 97475389  | 97475489  |
| chr13 | 50607861 | 50608061 | chr13 | 97577253  | 97577502  |
| chr13 | 50609110 | 50609610 | chr13 | 98188432  | 98188689  |
| chr13 | 51278638 | 51278838 | chr13 | 98645420  | 98645620  |
| chr13 | 51823829 | 51824029 | chr13 | 98646069  | 98646269  |
| chr13 | 51971635 | 51972137 | chr13 | 99255248  | 99255651  |
| chr13 | 52708809 | 52709512 | chr13 | 99366445  | 99366545  |
| chr13 | 53107667 | 53107867 | chr13 | 99956142  | 99956193  |
| chr13 | 53109667 | 53109819 | chr13 | 99956442  | 99956946  |
| chr13 | 53470068 | 53470262 | chr13 | 100339894 | 100340294 |
| chr13 | 54251885 | 54252434 | chr13 | 100547700 | 100547800 |
| chr13 | 54372745 | 54373245 | chr13 | 100548049 | 100548249 |
| chr13 | 54564251 | 54564651 | chr13 | 100564763 | 100565015 |
| chr13 | 54663133 | 54663591 | chr13 | 100888064 | 100888113 |
| chr13 | 54781979 | 54782094 | chr13 | 101056855 | 101057160 |
| chr13 | 54803972 | 54804072 | chr13 | 101057401 | 101057655 |
| chr13 | 54886436 | 54887036 | chr13 | 101183888 | 101184137 |
| chr13 | 54960540 | 54960889 | chr13 | 101215052 | 101215201 |
| chr13 | 55141531 | 55142131 | chr13 | 104224160 | 104224489 |
| chr13 | 55293244 | 55293344 | chr13 | 104569520 | 104570326 |
| chr13 | 55522433 | 55522533 | chr13 | 105541799 | 105542248 |
| chr13 | 55619487 | 55620036 | chr13 | 107482338 | 107482838 |
| chr13 | 55638509 | 55638709 | chr13 | 108617776 | 108618326 |
| chr13 | 55664424 | 55664624 | chr13 | 108673872 | 108673972 |
| chr13 | 55681333 | 55681633 | chr13 | 108674421 | 108674521 |
| chr13 | 55707734 | 55707834 | chr13 | 108775977 | 108776077 |
| chr13 | 55708392 | 55708483 | chr13 | 110854200 | 110854300 |
| chr13 | 55721238 | 55721687 | chr13 | 111950027 | 111950127 |
| chr13 | 55722687 | 55722787 | chr13 | 112145491 | 112145591 |

|       |          |          |       |           |           |
|-------|----------|----------|-------|-----------|-----------|
| chr13 | 55742609 | 55742809 | chr13 | 112923348 | 112923548 |
| chr13 | 55743558 | 55743658 | chr13 | 113113539 | 113113693 |
| chr13 | 55786242 | 55786691 | chr13 | 113640584 | 113640684 |
| chr13 | 55907968 | 55908117 | chr13 | 114253426 | 114253526 |
| chr13 | 55918467 | 55918667 | chr13 | 114611579 | 114611679 |
| chr13 | 55976978 | 55977278 | chr13 | 114918773 | 114918924 |
| chr13 | 56025274 | 56025625 | chr13 | 115391979 | 115392079 |
| chr13 | 56025774 | 56026074 | chr13 | 117483220 | 117483620 |
| chr13 | 56445512 | 56445612 | chr13 | 118845134 | 118845234 |
| chr13 | 56489151 | 56489700 | chr13 | 119867352 | 119868101 |
| chr13 | 56715207 | 56715407 | chr12 | 3235811   | 3235960   |
| chr13 | 56914728 | 56915082 | chr12 | 3572022   | 3572422   |
| chr13 | 56916728 | 56916977 | chr12 | 3572671   | 3572722   |
| chr13 | 58101723 | 58102274 | chr12 | 3572871   | 3572971   |
| chr13 | 58350278 | 58351027 | chr12 | 3954234   | 3954334   |
| chr13 | 58384727 | 58384827 | chr12 | 3954586   | 3955283   |
| chr13 | 58804067 | 58804216 | chr12 | 4082923   | 4083172   |
| chr13 | 58805099 | 58805260 | chr12 | 4133385   | 4133585   |
| chr13 | 58805399 | 58805556 | chr12 | 4225657   | 4225806   |
| chr13 | 58999743 | 58999843 | chr12 | 4592462   | 4592862   |
| chr13 | 59750434 | 59750547 | chr12 | 4806301   | 4806458   |
| chr13 | 59868983 | 59869232 | chr12 | 4905002   | 4905651   |
| chr13 | 59900008 | 59900108 | chr12 | 8289058   | 8289158   |
| chr13 | 60370813 | 60371418 | chr12 | 8300764   | 8301513   |
| chr13 | 60397525 | 60397834 | chr12 | 8487738   | 8487838   |
| chr13 | 60398676 | 60398876 | chr12 | 8586270   | 8586370   |
| chr13 | 60793825 | 60794025 | chr12 | 8757904   | 8758704   |
| chr13 | 60794274 | 60794929 | chr12 | 8865512   | 8865612   |
| chr13 | 60795478 | 60795578 | chr12 | 10377083  | 10377232  |
| chr13 | 62971803 | 62972152 | chr12 | 10378583  | 10378683  |
| chr13 | 63050913 | 63051013 | chr12 | 11253055  | 11253155  |
| chr13 | 63080933 | 63081333 | chr12 | 11425082  | 11425431  |
| chr13 | 63758614 | 63758714 | chr12 | 12929434  | 12930183  |
| chr13 | 64008638 | 64008838 | chr12 | 16641605  | 16641805  |
| chr13 | 64282329 | 64282529 | chr12 | 16799408  | 16799609  |
| chr13 | 64499820 | 64499920 | chr12 | 16883670  | 16883770  |
| chr13 | 64500169 | 64500369 | chr12 | 17164806  | 17165006  |
| chr13 | 64558306 | 64558406 | chr12 | 17252826  | 17253379  |
| chr13 | 67446580 | 67446729 | chr12 | 17254226  | 17254652  |
| chr13 | 69343723 | 69343823 | chr12 | 17533570  | 17533670  |
| chr13 | 69353907 | 69354107 | chr12 | 21051257  | 21051457  |
| chr13 | 69421627 | 69421927 | chr12 | 21051806  | 21051906  |
| chr13 | 69620381 | 69620581 | chr12 | 21182817  | 21183017  |

|       |          |          |       |          |          |
|-------|----------|----------|-------|----------|----------|
| chr13 | 70651843 | 70651943 | chr12 | 25463146 | 25463899 |
| chr13 | 71772680 | 71773380 | chr12 | 27241198 | 27241347 |
| chr13 | 72435998 | 72436447 | chr12 | 27253192 | 27253292 |
| chr13 | 72436698 | 72437198 | chr12 | 28126823 | 28126923 |
| chr13 | 73434794 | 73434894 | chr12 | 29366194 | 29366305 |
| chr13 | 73509089 | 73509289 | chr12 | 31368148 | 31368597 |
| chr13 | 73509939 | 73510338 | chr12 | 31856342 | 31856691 |
| chr13 | 73572090 | 73572190 | chr12 | 31857693 | 31858093 |
| chr13 | 73744773 | 73745225 | chr12 | 32048763 | 32049063 |
| chr13 | 73746213 | 73746413 | chr12 | 32134662 | 32134862 |
| chr13 | 73746862 | 73747162 | chr12 | 32135011 | 32135211 |
| chr13 | 74172394 | 74173143 | chr12 | 32221823 | 32222123 |
| chr13 | 74448378 | 74449078 | chr12 | 32283760 | 32283860 |
| chr13 | 74616815 | 74617364 | chr12 | 33164177 | 33164478 |
| chr13 | 76194203 | 76194303 | chr12 | 33604383 | 33604783 |
| chr13 | 78014306 | 78014406 | chr12 | 33738450 | 33738550 |
| chr13 | 81434565 | 81435016 | chr12 | 33738999 | 33739099 |
| chr13 | 81583872 | 81584321 | chr12 | 33931964 | 33932164 |
| chr13 | 83304655 | 83305056 | chr12 | 34213807 | 34214107 |
| chr13 | 84028444 | 84028893 | chr12 | 34740153 | 34740602 |
| chr13 | 84995525 | 84996025 | chr12 | 35831088 | 35831288 |
| chr13 | 91545491 | 91545591 | chr12 | 37099397 | 37099697 |
| chr13 | 91546340 | 91546540 | chr12 | 37099952 | 37100046 |
| chr13 | 91681956 | 91682156 | chr12 | 39721760 | 39722109 |
| chr13 | 91682512 | 91682913 | chr12 | 41076534 | 41077284 |
| chr13 | 93014829 | 93015478 | chr12 | 45541605 | 45542005 |
| chr13 | 93050643 | 93050743 | chr12 | 45660399 | 45660499 |
| chr13 | 93234127 | 93234382 | chr12 | 52657954 | 52658304 |
| chr13 | 93743848 | 93744048 | chr12 | 52972469 | 52972569 |
| chr13 | 93938995 | 93939095 | chr12 | 53251324 | 53251724 |
| chr13 | 94112992 | 94113292 | chr12 | 53252575 | 53253024 |
| chr13 | 94113641 | 94113741 | chr12 | 55483945 | 55484145 |
| chr13 | 94209015 | 94209164 | chr12 | 55939837 | 55940037 |
| chr13 | 94379377 | 94380326 | chr12 | 55940286 | 55940486 |
| chr13 | 94495952 | 94496652 | chr12 | 56079555 | 56079654 |
| chr13 | 94723938 | 94724038 | chr12 | 56146321 | 56146421 |
| chr13 | 94724687 | 94724887 | chr12 | 56146770 | 56146870 |
| chr13 | 94797800 | 94798100 | chr12 | 56408309 | 56408758 |
| chr13 | 94798449 | 94798651 | chr12 | 56682840 | 56683089 |
| chr13 | 96057244 | 96057444 | chr12 | 56775927 | 56776076 |
| chr13 | 96058493 | 96058593 | chr12 | 57630086 | 57630288 |
| chr13 | 96982405 | 96982605 | chr12 | 58514473 | 58514822 |
| chr13 | 97475240 | 97475340 | chr12 | 58830132 | 58830232 |

|       |           |           |       |          |          |
|-------|-----------|-----------|-------|----------|----------|
| chr13 | 97679680  | 97679980  | chr12 | 60295352 | 60295652 |
| chr13 | 98703043  | 98703243  | chr12 | 60295801 | 60295852 |
| chr13 | 98756769  | 98756869  | chr12 | 60345023 | 60345172 |
| chr13 | 99077135  | 99077242  | chr12 | 60377761 | 60378270 |
| chr13 | 99135533  | 99136533  | chr12 | 62806804 | 62806953 |
| chr13 | 99538458  | 99538607  | chr12 | 66201179 | 66201379 |
| chr13 | 100755769 | 100756318 | chr12 | 66249554 | 66249854 |
| chr13 | 100992200 | 100992300 | chr12 | 66356909 | 66357009 |
| chr13 | 101090545 | 101090745 | chr12 | 66357158 | 66357358 |
| chr13 | 102132349 | 102132562 | chr12 | 66358809 | 66359009 |
| chr13 | 103151365 | 103151465 | chr12 | 66359258 | 66359358 |
| chr13 | 103151626 | 103151916 | chr12 | 66455949 | 66456401 |
| chr13 | 104570873 | 104571027 | chr12 | 68506121 | 68506221 |
| chr13 | 104688632 | 104688881 | chr12 | 70441939 | 70442039 |
| chr13 | 105514112 | 105514261 | chr12 | 70467281 | 70467381 |
| chr13 | 107396190 | 107396290 | chr12 | 70525101 | 70525657 |
| chr13 | 107396439 | 107396839 | chr12 | 70579936 | 70580136 |
| chr13 | 107404946 | 107405799 | chr12 | 70655097 | 70655197 |
| chr13 | 107406908 | 107407259 | chr12 | 71008479 | 71008679 |
| chr13 | 110740647 | 110741108 | chr12 | 71270720 | 71270820 |
| chr13 | 111714054 | 111714154 | chr12 | 71395578 | 71395678 |
| chr13 | 113112088 | 113112491 | chr12 | 71396729 | 71396878 |
| chr13 | 113669196 | 113669445 | chr12 | 71736522 | 71736622 |
| chr13 | 114079942 | 114080042 | chr12 | 72108282 | 72108782 |
| chr13 | 114123246 | 114123346 | chr12 | 72221379 | 72221728 |
| chr13 | 114848581 | 114848841 | chr12 | 72419593 | 72419793 |
| chr13 | 114918973 | 114919173 | chr12 | 73114290 | 73114739 |
| chr13 | 115065974 | 115066523 | chr12 | 73354276 | 73354476 |
| chr13 | 115393428 | 115393528 | chr12 | 73367558 | 73367958 |
| chr13 | 116769322 | 116769622 | chr12 | 73368907 | 73369207 |
| chr13 | 116769871 | 116769971 | chr12 | 74044039 | 74044139 |
| chr13 | 117483976 | 117485195 | chr12 | 74044989 | 74045089 |
| chr13 | 117678864 | 117679264 | chr12 | 74223046 | 74223146 |
| chr13 | 119946388 | 119946588 | chr12 | 74406702 | 74407051 |
| chr13 | 119948637 | 119949037 | chr12 | 74571592 | 74571744 |
| chr12 | 3364931   | 3365131   | chr12 | 74829680 | 74829780 |
| chr12 | 3426700   | 3426800   | chr12 | 75579694 | 75579912 |
| chr12 | 3891230   | 3891530   | chr12 | 75580674 | 75580971 |
| chr12 | 4766055   | 4766454   | chr12 | 77537041 | 77537290 |
| chr12 | 4833300   | 4833700   | chr12 | 77686909 | 77687009 |
| chr12 | 4865174   | 4865623   | chr12 | 78105504 | 78105904 |
| chr12 | 4894766   | 4894866   | chr12 | 78521454 | 78521554 |
| chr12 | 5399244   | 5399696   | chr12 | 80145003 | 80145252 |



|       |          |          |       |          |          |
|-------|----------|----------|-------|----------|----------|
| chr12 | 8290010  | 8291210  | chr12 | 80413868 | 80414317 |
| chr12 | 8299064  | 8299426  | chr12 | 80455211 | 80455411 |
| chr12 | 8526998  | 8527198  | chr12 | 81397876 | 81397925 |
| chr12 | 8587019  | 8587419  | chr12 | 81471707 | 81471756 |
| chr12 | 8661684  | 8661784  | chr12 | 81543791 | 81543991 |
| chr12 | 8662233  | 8662533  | chr12 | 81719914 | 81720014 |
| chr12 | 8864963  | 8865463  | chr12 | 81926716 | 81926965 |
| chr12 | 8907214  | 8907568  | chr12 | 82229559 | 82229758 |
| chr12 | 8933599  | 8934249  | chr12 | 82309206 | 82310058 |
| chr12 | 8935399  | 8935648  | chr12 | 82616055 | 82616355 |
| chr12 | 11195717 | 11195866 | chr12 | 82706604 | 82706854 |
| chr12 | 11196117 | 11196266 | chr12 | 82815533 | 82815682 |
| chr12 | 11253704 | 11253804 | chr12 | 82815733 | 82815882 |
| chr12 | 12263668 | 12264120 | chr12 | 82913894 | 82914094 |
| chr12 | 14140206 | 14140355 | chr12 | 83064582 | 83064682 |
| chr12 | 15804347 | 15804447 | chr12 | 83141584 | 83141739 |
| chr12 | 15805296 | 15805396 | chr12 | 83143084 | 83143284 |
| chr12 | 16578902 | 16579251 | chr12 | 83899863 | 83899963 |
| chr12 | 16988088 | 16988288 | chr12 | 85480314 | 85480863 |
| chr12 | 16988437 | 16988537 | chr12 | 85555612 | 85555712 |
| chr12 | 17678045 | 17678645 | chr12 | 85801853 | 85801953 |
| chr12 | 17835946 | 17836046 | chr12 | 85861476 | 85861925 |
| chr12 | 20686545 | 20686645 | chr12 | 86076114 | 86076314 |
| chr12 | 20876687 | 20876787 | chr12 | 86109065 | 86109165 |
| chr12 | 21079972 | 21080072 | chr12 | 86109414 | 86109465 |
| chr12 | 21138725 | 21139074 | chr12 | 86789092 | 86789192 |
| chr12 | 21972115 | 21972215 | chr12 | 86970031 | 86970131 |
| chr12 | 25430324 | 25430473 | chr12 | 87011509 | 87011709 |
| chr12 | 25462046 | 25462146 | chr12 | 87132083 | 87132134 |
| chr12 | 27252643 | 27252843 | chr12 | 87132283 | 87132383 |
| chr12 | 27943744 | 27943944 | chr12 | 87167569 | 87167769 |
| chr12 | 29419236 | 29419945 | chr12 | 87266846 | 87267146 |
| chr12 | 29534412 | 29535261 | chr12 | 87477616 | 87477916 |
| chr12 | 30719813 | 30720162 | chr12 | 87478765 | 87479865 |
| chr12 | 30721813 | 30721913 | chr12 | 87873959 | 87874108 |
| chr12 | 31156906 | 31157055 | chr12 | 88152462 | 88152562 |
| chr12 | 31695395 | 31695644 | chr12 | 88471696 | 88471796 |
| chr12 | 31857444 | 31857544 | chr12 | 88528819 | 88529219 |
| chr12 | 32221171 | 32221371 | chr12 | 88677457 | 88677557 |
| chr12 | 32345872 | 32346221 | chr12 | 88818609 | 88819260 |
| chr12 | 32734655 | 32734855 | chr12 | 88819409 | 88819709 |
| chr12 | 32845784 | 32845884 | chr12 | 88940014 | 88940114 |
| chr12 | 33163228 | 33163328 | chr12 | 88942214 | 88942514 |

|       |          |          |       |           |           |
|-------|----------|----------|-------|-----------|-----------|
| chr12 | 33877458 | 33877858 | chr12 | 89454318  | 89454418  |
| chr12 | 33878207 | 33878507 | chr12 | 90324109  | 90324665  |
| chr12 | 33930662 | 33930819 | chr12 | 92809261  | 92809510  |
| chr12 | 35769232 | 35769332 | chr12 | 93661636  | 93661736  |
| chr12 | 36319125 | 36319325 | chr12 | 93858932  | 93859532  |
| chr12 | 36935881 | 36935981 | chr12 | 93919804  | 93920458  |
| chr12 | 37033290 | 37033744 | chr12 | 100334656 | 100334756 |
| chr12 | 37324790 | 37324939 | chr12 | 102184220 | 102184320 |
| chr12 | 40980776 | 40981076 | chr12 | 102275159 | 102275359 |
| chr12 | 41142015 | 41142415 | chr12 | 102800581 | 102800681 |
| chr12 | 41167315 | 41167665 | chr12 | 102963053 | 102963153 |
| chr12 | 41388529 | 41388629 | chr12 | 102963702 | 102964553 |
| chr12 | 41389278 | 41389378 | chr12 | 103103853 | 103103953 |
| chr12 | 45600997 | 45601246 | chr12 | 104033652 | 104033801 |
| chr12 | 46405920 | 46406120 | chr12 | 104051423 | 104051523 |
| chr12 | 51929314 | 51929414 | chr12 | 104203788 | 104203888 |
| chr12 | 54527024 | 54527373 | chr12 | 104204537 | 104204937 |
| chr12 | 56587907 | 56588056 | chr12 | 104358143 | 104358343 |
| chr12 | 56881716 | 56882080 | chr12 | 104544361 | 104544461 |
| chr12 | 57104978 | 57105078 | chr12 | 104780890 | 104781090 |
| chr12 | 57629630 | 57629730 | chr12 | 104832851 | 104832951 |
| chr12 | 58482034 | 58482290 | chr12 | 104833500 | 104833600 |
| chr12 | 59494565 | 59494665 | chr12 | 105317965 | 105318365 |
| chr12 | 59495116 | 59495365 | chr12 | 105607650 | 105607750 |
| chr12 | 60295901 | 60296001 | chr12 | 106119313 | 106119862 |
| chr12 | 60350848 | 60350948 | chr12 | 107084679 | 107085179 |
| chr12 | 60378422 | 60378519 | chr12 | 107107658 | 107107758 |
| chr12 | 66249105 | 66249205 | chr12 | 107679460 | 107679709 |
| chr12 | 66508585 | 66508785 | chr12 | 107760794 | 107761394 |
| chr12 | 68504472 | 68504572 | chr12 | 108083832 | 108083932 |
| chr12 | 70442588 | 70442688 | chr12 | 108084381 | 108084784 |
| chr12 | 70452438 | 70452538 | chr12 | 110207155 | 110207255 |
| chr12 | 70468130 | 70468230 | chr12 | 110730503 | 110730603 |
| chr12 | 70866333 | 70866735 | chr12 | 110820923 | 110821023 |
| chr12 | 71176786 | 71176886 | chr12 | 112305845 | 112306145 |
| chr12 | 71269871 | 71269971 | chr12 | 112475178 | 112475278 |
| chr12 | 71271671 | 71271920 | chr12 | 112512950 | 112513150 |
| chr12 | 71511135 | 71511535 | chr12 | 112766162 | 112766362 |
| chr12 | 72592861 | 72592961 | chr12 | 112869052 | 112869401 |
| chr12 | 74396330 | 74396530 | chr12 | 112917727 | 112917827 |
| chr12 | 74569992 | 74570542 | chr12 | 112918076 | 112918276 |
| chr12 | 75190866 | 75190966 | chr12 | 113247189 | 113247488 |
| chr12 | 75279096 | 75279496 | chr12 | 113248431 | 113248880 |

|       |          |          |       |           |           |
|-------|----------|----------|-------|-----------|-----------|
| chr12 | 76460066 | 76460923 | chr12 | 113299173 | 113300073 |
| chr12 | 76589546 | 76589995 | chr12 | 113514559 | 113514659 |
| chr12 | 76879983 | 76880083 | chr12 | 113704956 | 113705215 |
| chr12 | 77538641 | 77538790 | chr12 | 113740333 | 113740433 |
| chr12 | 77652199 | 77652299 | chr12 | 113741184 | 113741384 |
| chr12 | 77687258 | 77687558 | chr12 | 113742133 | 113742333 |
| chr12 | 77993930 | 77994030 | chr12 | 113937018 | 113937518 |
| chr12 | 78244819 | 78245019 | chr12 | 113995740 | 113995943 |
| chr12 | 78245468 | 78245568 | chr12 | 114633219 | 114633319 |
| chr12 | 80189984 | 80190084 | chr12 | 114647802 | 114648602 |
| chr12 | 81472307 | 81472707 | chr12 | 114673227 | 114673327 |
| chr12 | 81472856 | 81473456 | chr12 | 114889106 | 114889306 |
| chr12 | 81719165 | 81719365 | chr12 | 114889755 | 114891106 |
| chr12 | 82043313 | 82044064 | chr12 | 115125781 | 115126332 |
| chr12 | 82251159 | 82251259 | chr12 | 115184134 | 115184883 |
| chr12 | 82308556 | 82308656 | chr12 | 115214544 | 115214644 |
| chr12 | 85386895 | 85387095 | chr12 | 118082741 | 118082890 |
| chr12 | 85554512 | 85554661 | chr12 | 118112227 | 118112327 |
| chr12 | 85634395 | 85634644 | chr12 | 118440587 | 118440787 |
| chr12 | 85830139 | 85830588 | chr11 | 3270895   | 3271144   |
| chr12 | 85906422 | 85906722 | chr11 | 3271195   | 3271644   |
| chr12 | 85940827 | 85941027 | chr11 | 3309087   | 3309287   |
| chr12 | 86109514 | 86109614 | chr11 | 3350975   | 3351324   |
| chr12 | 86200772 | 86200872 | chr11 | 3440242   | 3440342   |
| chr12 | 86201121 | 86201321 | chr11 | 3763755   | 3763855   |
| chr12 | 86362248 | 86362548 | chr11 | 3794696   | 3795045   |
| chr12 | 86491204 | 86491553 | chr11 | 3832186   | 3832835   |
| chr12 | 86903293 | 86903493 | chr11 | 3883764   | 3884164   |
| chr12 | 86944764 | 86944964 | chr11 | 3931833   | 3931933   |
| chr12 | 86969582 | 86969682 | chr11 | 3964243   | 3964643   |
| chr12 | 87012258 | 87012309 | chr11 | 4060519   | 4060719   |
| chr12 | 87080649 | 87081898 | chr11 | 4086535   | 4087084   |
| chr12 | 87477516 | 87477570 | chr11 | 4116953   | 4117453   |
| chr12 | 87478173 | 87478265 | chr11 | 4136222   | 4136671   |
| chr12 | 87539235 | 87539784 | chr11 | 4166597   | 4166897   |
| chr12 | 87617642 | 87618194 | chr11 | 4167346   | 4167446   |
| chr12 | 87871492 | 87871592 | chr11 | 4494644   | 4494844   |
| chr12 | 88034674 | 88034974 | chr11 | 4527569   | 4527718   |
| chr12 | 88529468 | 88529768 | chr11 | 4749053   | 4749602   |
| chr12 | 88740456 | 88740556 | chr11 | 4773616   | 4773865   |
| chr12 | 88895685 | 88895885 | chr11 | 4774016   | 4774165   |
| chr12 | 89332930 | 89333030 | chr11 | 4956130   | 4956230   |
| chr12 | 93857283 | 93857532 | chr11 | 4964354   | 4964554   |

|       |           |           |       |          |          |
|-------|-----------|-----------|-------|----------|----------|
| chr12 | 93858383  | 93858783  | chr11 | 4965403  | 4965503  |
| chr12 | 94955115  | 94955415  | chr11 | 4999404  | 4999504  |
| chr12 | 97772242  | 97772494  | chr11 | 5052374  | 5052674  |
| chr12 | 100653910 | 100654559 | chr11 | 5607637  | 5607737  |
| chr12 | 100820337 | 100821286 | chr11 | 5608188  | 5608288  |
| chr12 | 102041626 | 102041726 | chr11 | 5641102  | 5641202  |
| chr12 | 102274610 | 102274810 | chr11 | 5688632  | 5688981  |
| chr12 | 103902373 | 103902775 | chr11 | 5762149  | 5762398  |
| chr12 | 104050774 | 104051174 | chr11 | 5855034  | 5855783  |
| chr12 | 104628938 | 104629087 | chr11 | 6099665  | 6099965  |
| chr12 | 104630538 | 104630787 | chr11 | 6100114  | 6100214  |
| chr12 | 104779739 | 104779839 | chr11 | 6191699  | 6191799  |
| chr12 | 104782041 | 104782190 | chr11 | 6288966  | 6289166  |
| chr12 | 104818627 | 104818927 | chr11 | 6447316  | 6447418  |
| chr12 | 104973990 | 104974290 | chr11 | 6525733  | 6526382  |
| chr12 | 105464174 | 105464523 | chr11 | 6963191  | 6963291  |
| chr12 | 106065491 | 106066140 | chr11 | 11014399 | 11014499 |
| chr12 | 106088722 | 106089371 | chr11 | 11584215 | 11584415 |
| chr12 | 106549155 | 106549656 | chr11 | 11709035 | 11709135 |
| chr12 | 106827571 | 106827871 | chr11 | 11937911 | 11938011 |
| chr12 | 106940395 | 106940938 | chr11 | 12364852 | 12365052 |
| chr12 | 107085328 | 107086128 | chr11 | 16652505 | 16652654 |
| chr12 | 107106058 | 107106407 | chr11 | 17853600 | 17854000 |
| chr12 | 107298530 | 107299030 | chr11 | 17855451 | 17855717 |
| chr12 | 107678409 | 107678616 | chr11 | 20012415 | 20012615 |
| chr12 | 107721699 | 107721799 | chr11 | 20012764 | 20013064 |
| chr12 | 107722557 | 107722848 | chr11 | 20100604 | 20101214 |
| chr12 | 107875077 | 107875428 | chr11 | 20149669 | 20149769 |
| chr12 | 110001038 | 110001187 | chr11 | 20594844 | 20595293 |
| chr12 | 110033535 | 110033735 | chr11 | 21270827 | 21270978 |
| chr12 | 110362193 | 110362293 | chr11 | 21471583 | 21472232 |
| chr12 | 110363242 | 110363442 | chr11 | 21901254 | 21901354 |
| chr12 | 110581732 | 110581881 | chr11 | 22186241 | 22186441 |
| chr12 | 110583232 | 110583332 | chr11 | 22412185 | 22412285 |
| chr12 | 110731252 | 110731452 | chr11 | 22871836 | 22871936 |
| chr12 | 110865489 | 110865589 | chr11 | 22872385 | 22872485 |
| chr12 | 110866338 | 110866438 | chr11 | 22913135 | 22913241 |
| chr12 | 110878351 | 110879051 | chr11 | 23533770 | 23534070 |
| chr12 | 110879300 | 110879400 | chr11 | 23567278 | 23567431 |
| chr12 | 111047814 | 111047963 | chr11 | 23671319 | 23671831 |
| chr12 | 111623516 | 111624016 | chr11 | 23796553 | 23797110 |
| chr12 | 111624268 | 111624865 | chr11 | 25670670 | 25670830 |
| chr12 | 112476033 | 112476233 | chr11 | 28483996 | 28484445 |

|       |           |           |       |          |          |
|-------|-----------|-----------|-------|----------|----------|
| chr12 | 112725257 | 112725557 | chr11 | 29030250 | 29030404 |
| chr12 | 112919229 | 112919578 | chr11 | 29072595 | 29072795 |
| chr12 | 112919629 | 112919686 | chr11 | 29073244 | 29073344 |
| chr12 | 113008083 | 113008283 | chr11 | 29273174 | 29273474 |
| chr12 | 113067111 | 113067411 | chr11 | 29593720 | 29593920 |
| chr12 | 113246624 | 113247131 | chr11 | 30119572 | 30119921 |
| chr12 | 113297724 | 113298224 | chr11 | 30671961 | 30672110 |
| chr12 | 113406622 | 113406822 | chr11 | 30854511 | 30854611 |
| chr12 | 113446302 | 113446651 | chr11 | 30886334 | 30886691 |
| chr12 | 113568084 | 113568484 | chr11 | 31269561 | 31269661 |
| chr12 | 113602682 | 113603182 | chr11 | 31571911 | 31572111 |
| chr12 | 113700382 | 113701832 | chr11 | 31864948 | 31865248 |
| chr12 | 113840853 | 113841802 | chr11 | 32105115 | 32105264 |
| chr12 | 114517280 | 114517480 | chr11 | 32167114 | 32167663 |
| chr12 | 114539735 | 114541538 | chr11 | 32169414 | 32169563 |
| chr12 | 114703153 | 114703853 | chr11 | 32176701 | 32177050 |
| chr12 | 114748847 | 114749047 | chr11 | 32353971 | 32354127 |
| chr12 | 114835788 | 114836688 | chr11 | 33062556 | 33062656 |
| chr12 | 114836837 | 114837288 | chr11 | 33103108 | 33104108 |
| chr12 | 114970332 | 114970583 | chr11 | 33743027 | 33743127 |
| chr12 | 115003276 | 115003425 | chr11 | 33862385 | 33863134 |
| chr12 | 115103115 | 115103215 | chr11 | 34108238 | 34108338 |
| chr12 | 115103364 | 115103564 | chr11 | 35617587 | 35618036 |
| chr12 | 115167609 | 115167809 | chr11 | 35763919 | 35764219 |
| chr12 | 115168560 | 115168860 | chr11 | 36727324 | 36727473 |
| chr12 | 115179125 | 115179274 | chr11 | 40475943 | 40476243 |
| chr12 | 115180325 | 115180674 | chr11 | 40517849 | 40517998 |
| chr12 | 115289002 | 115289202 | chr11 | 42202137 | 42202337 |
| chr12 | 118297723 | 118297972 | chr11 | 43209262 | 43209711 |
| chr12 | 118438338 | 118438638 | chr11 | 44253526 | 44253975 |
| chr12 | 118520369 | 118520669 | chr11 | 44401731 | 44401831 |
| chr12 | 119876304 | 119876404 | chr11 | 45729768 | 45730065 |
| chr12 | 120334013 | 120334213 | chr11 | 45839632 | 45839781 |
| chr11 | 3387401   | 3388001   | chr11 | 45949540 | 45949689 |
| chr11 | 3388350   | 3388550   | chr11 | 46095431 | 46095531 |
| chr11 | 3931484   | 3931584   | chr11 | 46096080 | 46096384 |
| chr11 | 4018232   | 4018881   | chr11 | 46174030 | 46174230 |
| chr11 | 4034204   | 4035153   | chr11 | 46188110 | 46188210 |
| chr11 | 4060070   | 4060170   | chr11 | 46220554 | 46221003 |
| chr11 | 4060419   | 4060470   | chr11 | 46533857 | 46534115 |
| chr11 | 4116253   | 4116802   | chr11 | 47162832 | 47162932 |
| chr11 | 4134422   | 4134471   | chr11 | 48972370 | 48972526 |
| chr11 | 4135622   | 4135771   | chr11 | 49393407 | 49393556 |

|       |          |          |       |          |          |
|-------|----------|----------|-------|----------|----------|
| chr11 | 4157070  | 4158019  | chr11 | 49446090 | 49446390 |
| chr11 | 4165246  | 4165446  | chr11 | 49497591 | 49498249 |
| chr11 | 4647530  | 4647830  | chr11 | 49577693 | 49577893 |
| chr11 | 4795045  | 4795494  | chr11 | 49685115 | 49685315 |
| chr11 | 4852669  | 4852918  | chr11 | 49808111 | 49808611 |
| chr11 | 4956379  | 4956930  | chr11 | 50049949 | 50050149 |
| chr11 | 4998355  | 4998455  | chr11 | 50108872 | 50109072 |
| chr11 | 5161966  | 5162266  | chr11 | 50109621 | 50109721 |
| chr11 | 5420597  | 5420697  | chr11 | 50161343 | 50161443 |
| chr11 | 5608646  | 5608749  | chr11 | 50214641 | 50214741 |
| chr11 | 5703585  | 5703785  | chr11 | 50695957 | 50696114 |
| chr11 | 5798382  | 5798582  | chr11 | 50727138 | 50727487 |
| chr11 | 6130075  | 6130375  | chr11 | 50737762 | 50737962 |
| chr11 | 6287466  | 6287825  | chr11 | 51046351 | 51046551 |
| chr11 | 6287866  | 6288215  | chr11 | 51368332 | 51368832 |
| chr11 | 6294427  | 6294776  | chr11 | 51419377 | 51419526 |
| chr11 | 6314472  | 6314621  | chr11 | 51433136 | 51433285 |
| chr11 | 6315772  | 6315872  | chr11 | 51540515 | 51540823 |
| chr11 | 6375969  | 6376169  | chr11 | 51751592 | 51751692 |
| chr11 | 6557084  | 6557184  | chr11 | 51783468 | 51783868 |
| chr11 | 6558435  | 6558984  | chr11 | 51784117 | 51784317 |
| chr11 | 7097284  | 7097584  | chr11 | 51881904 | 51882004 |
| chr11 | 8950843  | 8950943  | chr11 | 52015638 | 52015789 |
| chr11 | 11013950 | 11014050 | chr11 | 52142944 | 52143044 |
| chr11 | 11362060 | 11362160 | chr11 | 52143328 | 52143477 |
| chr11 | 11781006 | 11782306 | chr11 | 52547886 | 52548186 |
| chr11 | 12364303 | 12364403 | chr11 | 53083919 | 53084722 |
| chr11 | 17059200 | 17059400 | chr11 | 53240419 | 53240928 |
| chr11 | 18920043 | 18920143 | chr11 | 53302480 | 53302880 |
| chr11 | 19824230 | 19824831 | chr11 | 53401795 | 53402395 |
| chr11 | 20014429 | 20014778 | chr11 | 53674741 | 53674841 |
| chr11 | 21271327 | 21271627 | chr11 | 53675390 | 53675490 |
| chr11 | 21902103 | 21902303 | chr11 | 53763108 | 53763308 |
| chr11 | 22766735 | 22766835 | chr11 | 53763957 | 53764057 |
| chr11 | 22882284 | 22882943 | chr11 | 53811271 | 53812020 |
| chr11 | 22890592 | 22890792 | chr11 | 53852149 | 53852449 |
| chr11 | 22912786 | 22912886 | chr11 | 54087753 | 54087953 |
| chr11 | 23155340 | 23155640 | chr11 | 54221669 | 54221769 |
| chr11 | 23397795 | 23397995 | chr11 | 54571266 | 54571366 |
| chr11 | 23419295 | 23419495 | chr11 | 54649918 | 54650018 |
| chr11 | 23420144 | 23420255 | chr11 | 54686230 | 54686679 |
| chr11 | 29274123 | 29274223 | chr11 | 54817144 | 54817444 |
| chr11 | 30672161 | 30672410 | chr11 | 54881846 | 54882046 |

|       |          |          |       |          |          |
|-------|----------|----------|-------|----------|----------|
| chr11 | 30791296 | 30791545 | chr11 | 54985950 | 54986403 |
| chr11 | 31270210 | 31270310 | chr11 | 55244219 | 55244668 |
| chr11 | 31271597 | 31271746 | chr11 | 55252947 | 55253047 |
| chr11 | 32122487 | 32122887 | chr11 | 55253696 | 55253796 |
| chr11 | 32432704 | 32432804 | chr11 | 55824068 | 55824317 |
| chr11 | 32433053 | 32433104 | chr11 | 57455750 | 57455850 |
| chr11 | 32542474 | 32542574 | chr11 | 58118013 | 58118213 |
| chr11 | 33046900 | 33047200 | chr11 | 58134171 | 58134371 |
| chr11 | 33499001 | 33499350 | chr11 | 58141281 | 58141930 |
| chr11 | 34213121 | 34213471 | chr11 | 58266805 | 58266914 |
| chr11 | 35553064 | 35553413 | chr11 | 58407900 | 58408200 |
| chr11 | 35582104 | 35582604 | chr11 | 58587937 | 58588037 |
| chr11 | 35618087 | 35618236 | chr11 | 58773138 | 58773545 |
| chr11 | 43257623 | 43257823 | chr11 | 58994735 | 58995335 |
| chr11 | 43531054 | 43531303 | chr11 | 58995884 | 58995984 |
| chr11 | 44183343 | 44183892 | chr11 | 59002125 | 59002225 |
| chr11 | 45729516 | 45729716 | chr11 | 59012725 | 59012876 |
| chr11 | 45762890 | 45762990 | chr11 | 59013125 | 59013374 |
| chr11 | 45838032 | 45839381 | chr11 | 59018969 | 59019618 |
| chr11 | 47162683 | 47162783 | chr11 | 59317920 | 59318120 |
| chr11 | 48931944 | 48932293 | chr11 | 59351694 | 59352143 |
| chr11 | 48943106 | 48943206 | chr11 | 59382796 | 59382896 |
| chr11 | 48987431 | 48987529 | chr11 | 59620982 | 59621131 |
| chr11 | 49027526 | 49027726 | chr11 | 59658681 | 59658781 |
| chr11 | 49027975 | 49028075 | chr11 | 59759022 | 59759471 |
| chr11 | 49446440 | 49446549 | chr11 | 59926370 | 59926470 |
| chr11 | 49629334 | 49630034 | chr11 | 60032662 | 60033163 |
| chr11 | 49994420 | 49994720 | chr11 | 60163288 | 60163488 |
| chr11 | 50050798 | 50051498 | chr11 | 60163637 | 60163737 |
| chr11 | 50384965 | 50385265 | chr11 | 60228765 | 60228865 |
| chr11 | 50625182 | 50625282 | chr11 | 60264774 | 60265374 |
| chr11 | 50699646 | 50700446 | chr11 | 60279847 | 60279996 |
| chr11 | 50700595 | 50700995 | chr11 | 60348635 | 60348786 |
| chr11 | 50736713 | 50737213 | chr11 | 60537606 | 60537706 |
| chr11 | 50868067 | 50868167 | chr11 | 60689690 | 60690090 |
| chr11 | 50868416 | 50868567 | chr11 | 60742714 | 60743114 |
| chr11 | 51368083 | 51368183 | chr11 | 60951092 | 60951292 |
| chr11 | 51390377 | 51390577 | chr11 | 60985979 | 60986179 |
| chr11 | 51434685 | 51434785 | chr11 | 61077436 | 61078085 |
| chr11 | 51547417 | 51547666 | chr11 | 61188373 | 61189322 |
| chr11 | 51641911 | 51642011 | chr11 | 61296301 | 61296701 |
| chr11 | 51751443 | 51751543 | chr11 | 61316029 | 61316229 |
| chr11 | 52065652 | 52065852 | chr11 | 61531508 | 61531657 |

|       |          |          |       |          |          |
|-------|----------|----------|-------|----------|----------|
| chr11 | 52066901 | 52067852 | chr11 | 61665226 | 61665426 |
| chr11 | 52144228 | 52144428 | chr11 | 61740984 | 61741384 |
| chr11 | 52546537 | 52546835 | chr11 | 62059051 | 62059451 |
| chr11 | 53084773 | 53085322 | chr11 | 62090638 | 62091144 |
| chr11 | 53134662 | 53134862 | chr11 | 62267668 | 62267768 |
| chr11 | 53214244 | 53214544 | chr11 | 62459381 | 62459581 |
| chr11 | 53263309 | 53263509 | chr11 | 62872067 | 62872167 |
| chr11 | 53351083 | 53351183 | chr11 | 62942267 | 62942367 |
| chr11 | 53418801 | 53418950 | chr11 | 63734393 | 63734493 |
| chr11 | 53419501 | 53419701 | chr11 | 64245954 | 64246203 |
| chr11 | 53552211 | 53552611 | chr11 | 65080966 | 65081215 |
| chr11 | 53852698 | 53852798 | chr11 | 65599360 | 65599561 |
| chr11 | 53853249 | 53853749 | chr11 | 66863698 | 66863847 |
| chr11 | 53883296 | 53883796 | chr11 | 67342931 | 67343031 |
| chr11 | 54033323 | 54033623 | chr11 | 67733148 | 67733348 |
| chr11 | 54087404 | 54087504 | chr11 | 67775291 | 67775598 |
| chr11 | 54306259 | 54306559 | chr11 | 68242536 | 68242785 |
| chr11 | 54746493 | 54746742 | chr11 | 68242836 | 68243036 |
| chr11 | 54861619 | 54861819 | chr11 | 68243185 | 68243385 |
| chr11 | 54881197 | 54881297 | chr11 | 68366794 | 68366894 |
| chr11 | 54987850 | 54988050 | chr11 | 68404774 | 68404874 |
| chr11 | 55244719 | 55245619 | chr11 | 68501975 | 68502075 |
| chr11 | 57329192 | 57329292 | chr11 | 68784478 | 68785778 |
| chr11 | 57642456 | 57642605 | chr11 | 68826545 | 68826694 |
| chr11 | 57642956 | 57643556 | chr11 | 68856351 | 68856800 |
| chr11 | 57643705 | 57644505 | chr11 | 68881717 | 68881866 |
| chr11 | 58133722 | 58133822 | chr11 | 69008148 | 69008397 |
| chr11 | 58230017 | 58230366 | chr11 | 69008448 | 69009097 |
| chr11 | 58265632 | 58265683 | chr11 | 69047103 | 69047303 |
| chr11 | 58436911 | 58437302 | chr11 | 69133637 | 69133737 |
| chr11 | 58451073 | 58451273 | chr11 | 69390089 | 69390189 |
| chr11 | 58543921 | 58544021 | chr11 | 69465814 | 69466014 |
| chr11 | 58588093 | 58588337 | chr11 | 69482624 | 69483199 |
| chr11 | 58597244 | 58597493 | chr11 | 69606601 | 69606701 |
| chr11 | 58716034 | 58716134 | chr11 | 69629404 | 69629498 |
| chr11 | 58728165 | 58728465 | chr11 | 69669775 | 69669875 |
| chr11 | 58729014 | 58729114 | chr11 | 69691815 | 69691915 |
| chr11 | 58789024 | 58789224 | chr11 | 69711299 | 69711848 |
| chr11 | 58993635 | 58994284 | chr11 | 69746183 | 69746383 |
| chr11 | 59002674 | 59002979 | chr11 | 69776258 | 69776758 |
| chr11 | 59017269 | 59017425 | chr11 | 69791185 | 69791285 |
| chr11 | 59039244 | 59039444 | chr11 | 69806639 | 69806839 |
| chr11 | 59101460 | 59101609 | chr11 | 69811034 | 69811434 |



|       |          |          |       |          |          |
|-------|----------|----------|-------|----------|----------|
| chr11 | 59117338 | 59117538 | chr11 | 69811783 | 69811883 |
| chr11 | 59262251 | 59262400 | chr11 | 69827518 | 69827668 |
| chr11 | 59316520 | 59317369 | chr11 | 70024516 | 70025081 |
| chr11 | 59382047 | 59382147 | chr11 | 70067150 | 70067550 |
| chr11 | 59400396 | 59400545 | chr11 | 70163024 | 70163524 |
| chr11 | 59423774 | 59423874 | chr11 | 70262539 | 70262788 |
| chr11 | 59471440 | 59472299 | chr11 | 70262839 | 70262939 |
| chr11 | 59473050 | 59473150 | chr11 | 70263088 | 70263188 |
| chr11 | 59657081 | 59657330 | chr11 | 70315390 | 70315590 |
| chr11 | 59775451 | 59776051 | chr11 | 70325225 | 70325481 |
| chr11 | 59776300 | 59777400 | chr11 | 70373507 | 70373656 |
| chr11 | 59915121 | 59915321 | chr11 | 70465093 | 70466708 |
| chr11 | 59925721 | 59926121 | chr11 | 70513713 | 70513913 |
| chr11 | 59949790 | 59949990 | chr11 | 70574955 | 70575504 |
| chr11 | 60031413 | 60031762 | chr11 | 70655233 | 70655633 |
| chr11 | 60032313 | 60032413 | chr11 | 70779284 | 70779470 |
| chr11 | 60264425 | 60264725 | chr11 | 70793478 | 70793627 |
| chr11 | 60278896 | 60279096 | chr11 | 70814841 | 70815090 |
| chr11 | 60349135 | 60349235 | chr11 | 70830219 | 70830468 |
| chr11 | 60537955 | 60538055 | chr11 | 70844313 | 70844413 |
| chr11 | 60589151 | 60589251 | chr11 | 71847767 | 71847867 |
| chr11 | 60724099 | 60724348 | chr11 | 71848967 | 71849316 |
| chr11 | 60742565 | 60742665 | chr11 | 71852810 | 71852959 |
| chr11 | 60985230 | 60985330 | chr11 | 71948036 | 71948436 |
| chr11 | 61153369 | 61153718 | chr11 | 72015180 | 72015380 |
| chr11 | 61315780 | 61315980 | chr11 | 72077474 | 72077774 |
| chr11 | 61389960 | 61390409 | chr11 | 72112573 | 72112822 |
| chr11 | 61572509 | 61572958 | chr11 | 72246083 | 72246183 |
| chr11 | 61666075 | 61666484 | chr11 | 72772412 | 72772512 |
| chr11 | 61887605 | 61887705 | chr11 | 72830110 | 72830310 |
| chr11 | 62090488 | 62090588 | chr11 | 72971034 | 72971383 |
| chr11 | 62268517 | 62269217 | chr11 | 72988440 | 72988540 |
| chr11 | 62629561 | 62630010 | chr11 | 73009890 | 73010490 |
| chr11 | 62630961 | 62631510 | chr11 | 74534979 | 74535079 |
| chr11 | 62689902 | 62690202 | chr11 | 74535228 | 74535528 |
| chr11 | 62872716 | 62872917 | chr11 | 74640932 | 74641532 |
| chr11 | 62941067 | 62941118 | chr11 | 74642081 | 74642181 |
| chr11 | 63734742 | 63734848 | chr11 | 74707115 | 74707215 |
| chr11 | 63890023 | 63890172 | chr11 | 74736481 | 74736582 |
| chr11 | 64788205 | 64788863 | chr11 | 74737131 | 74737231 |
| chr11 | 65080366 | 65080515 | chr11 | 74989117 | 74989617 |
| chr11 | 65618201 | 65618352 | chr11 | 75002383 | 75002632 |
| chr11 | 66337684 | 66337784 | chr11 | 75004932 | 75005032 |

|       |          |          |       |          |          |
|-------|----------|----------|-------|----------|----------|
| chr11 | 66722199 | 66723248 | chr11 | 75233570 | 75233970 |
| chr11 | 66835762 | 66836311 | chr11 | 75297498 | 75297598 |
| chr11 | 67496654 | 67496954 | chr11 | 75341616 | 75342016 |
| chr11 | 67582216 | 67582312 | chr11 | 75461186 | 75461435 |
| chr11 | 67607096 | 67607296 | chr11 | 75462286 | 75462435 |
| chr11 | 67607547 | 67607945 | chr11 | 75542408 | 75542609 |
| chr11 | 67776147 | 67776247 | chr11 | 75607566 | 75608021 |
| chr11 | 68197878 | 68198178 | chr11 | 75990839 | 75991096 |
| chr11 | 68503024 | 68503224 | chr11 | 76028229 | 76028578 |
| chr11 | 68767167 | 68767367 | chr11 | 76054559 | 76054659 |
| chr11 | 68768316 | 68768816 | chr11 | 76210001 | 76210201 |
| chr11 | 68779294 | 68779403 | chr11 | 76217498 | 76217947 |
| chr11 | 69135688 | 69136337 | chr11 | 76490681 | 76490830 |
| chr11 | 69150725 | 69151225 | chr11 | 76490881 | 76491130 |
| chr11 | 69151674 | 69152074 | chr11 | 76809617 | 76809766 |
| chr11 | 69205617 | 69205717 | chr11 | 76962536 | 76962579 |
| chr11 | 69209092 | 69209788 | chr11 | 77303820 | 77303920 |
| chr11 | 69223984 | 69224033 | chr11 | 77324131 | 77324436 |
| chr11 | 69225384 | 69226233 | chr11 | 77846949 | 77847149 |
| chr11 | 69441931 | 69442029 | chr11 | 77847998 | 77848749 |
| chr11 | 69464181 | 69464730 | chr11 | 77925489 | 77925583 |
| chr11 | 69473751 | 69475200 | chr11 | 77926434 | 77926583 |
| chr11 | 69478372 | 69478826 | chr11 | 78056554 | 78056805 |
| chr11 | 69492355 | 69492455 | chr11 | 78072183 | 78072383 |
| chr11 | 69493979 | 69494179 | chr11 | 78072832 | 78072932 |
| chr11 | 69494328 | 69494428 | chr11 | 78134906 | 78135106 |
| chr11 | 69572153 | 69572607 | chr11 | 78139063 | 78139563 |
| chr11 | 69608553 | 69608702 | chr11 | 78152879 | 78153179 |
| chr11 | 69612034 | 69612383 | chr11 | 78309656 | 78310156 |
| chr11 | 69628998 | 69629149 | chr11 | 78323453 | 78323553 |
| chr11 | 69645515 | 69645921 | chr11 | 78347244 | 78347344 |
| chr11 | 69647166 | 69647315 | chr11 | 78362444 | 78362596 |
| chr11 | 69657233 | 69657433 | chr11 | 78508031 | 78508331 |
| chr11 | 69693464 | 69693568 | chr11 | 78956870 | 78957070 |
| chr11 | 69708061 | 69708310 | chr11 | 79065453 | 79065653 |
| chr11 | 69712299 | 69712499 | chr11 | 79150100 | 79150601 |
| chr11 | 69712948 | 69713748 | chr11 | 79150850 | 79151150 |
| chr11 | 69724000 | 69724500 | chr11 | 79891266 | 79891615 |
| chr11 | 69732299 | 69732399 | chr11 | 79900220 | 79900569 |
| chr11 | 69759092 | 69759292 | chr11 | 79994553 | 79995002 |
| chr11 | 69775109 | 69775609 | chr11 | 80620972 | 80621072 |
| chr11 | 69792138 | 69792248 | chr11 | 82591843 | 82592243 |
| chr11 | 69809434 | 69809634 | chr11 | 82700898 | 82701747 |

|       |          |          |       |          |          |
|-------|----------|----------|-------|----------|----------|
| chr11 | 69810383 | 69810592 | chr11 | 82718780 | 82718980 |
| chr11 | 69828267 | 69828367 | chr11 | 82721780 | 82721980 |
| chr11 | 69865372 | 69865672 | chr11 | 82761010 | 82761268 |
| chr11 | 70066050 | 70066499 | chr11 | 82985899 | 82986448 |
| chr11 | 70163773 | 70164273 | chr11 | 83109286 | 83109535 |
| chr11 | 70270443 | 70271643 | chr11 | 83113812 | 83113961 |
| chr11 | 70272545 | 70272694 | chr11 | 83240613 | 83240813 |
| chr11 | 70329845 | 70330394 | chr11 | 83273619 | 83273670 |
| chr11 | 70456397 | 70456646 | chr11 | 83661664 | 83662313 |
| chr11 | 70467759 | 70468108 | chr11 | 83879315 | 83879415 |
| chr11 | 70480302 | 70480902 | chr11 | 83939877 | 83940077 |
| chr11 | 70498699 | 70498799 | chr11 | 84324259 | 84324459 |
| chr11 | 70510464 | 70510664 | chr11 | 84629973 | 84630073 |
| chr11 | 70511613 | 70511913 | chr11 | 84681797 | 84681997 |
| chr11 | 70573504 | 70573904 | chr11 | 84691353 | 84691459 |
| chr11 | 70780021 | 70780570 | chr11 | 85121862 | 85122062 |
| chr11 | 71848019 | 71848316 | chr11 | 85698871 | 85699171 |
| chr11 | 72016129 | 72016411 | chr11 | 86011602 | 86011951 |
| chr11 | 72018012 | 72018512 | chr11 | 86013602 | 86013851 |
| chr11 | 72078323 | 72078523 | chr11 | 86295384 | 86295833 |
| chr11 | 72172182 | 72173131 | chr11 | 86354916 | 86355016 |
| chr11 | 72246234 | 72246583 | chr11 | 86355665 | 86355765 |
| chr11 | 72808904 | 72809004 | chr11 | 86568650 | 86568850 |
| chr11 | 72809355 | 72809904 | chr11 | 86784667 | 86784767 |
| chr11 | 72809955 | 72810304 | chr11 | 86884357 | 86884706 |
| chr11 | 72829561 | 72829661 | chr11 | 86897086 | 86897586 |
| chr11 | 72858688 | 72858788 | chr11 | 86897735 | 86897838 |
| chr11 | 72859037 | 72859137 | chr11 | 86920370 | 86921426 |
| chr11 | 72900391 | 72900591 | chr11 | 87214951 | 87215351 |
| chr11 | 72900840 | 72901140 | chr11 | 87390739 | 87391588 |
| chr11 | 72949353 | 72949859 | chr11 | 87402928 | 87403077 |
| chr11 | 73010539 | 73010639 | chr11 | 87548173 | 87548522 |
| chr11 | 73048267 | 73048367 | chr11 | 87909857 | 87910057 |
| chr11 | 73048616 | 73048767 | chr11 | 88400556 | 88400705 |
| chr11 | 73077828 | 73078228 | chr11 | 88758090 | 88758390 |
| chr11 | 74400533 | 74401133 | chr11 | 88879687 | 88879836 |
| chr11 | 74401482 | 74401882 | chr11 | 88880687 | 88880936 |
| chr11 | 74708668 | 74708864 | chr11 | 88906226 | 88906375 |
| chr11 | 74989966 | 74990066 | chr11 | 90298536 | 90298685 |
| chr11 | 74991217 | 74991366 | chr11 | 93793053 | 93793297 |
| chr11 | 75004183 | 75004383 | chr11 | 93862394 | 93862694 |
| chr11 | 75159404 | 75159553 | chr11 | 93874559 | 93874708 |
| chr11 | 75233321 | 75233521 | chr11 | 94116591 | 94117724 |

|       |          |          |       |           |           |
|-------|----------|----------|-------|-----------|-----------|
| chr11 | 75250639 | 75250939 | chr11 | 94148587  | 94149087  |
| chr11 | 75277987 | 75278487 | chr11 | 94300714  | 94300814  |
| chr11 | 75321102 | 75321202 | chr11 | 94300963  | 94301463  |
| chr11 | 75323349 | 75324349 | chr11 | 94379863  | 94379963  |
| chr11 | 75342465 | 75342665 | chr11 | 94380912  | 94381913  |
| chr11 | 75396916 | 75397416 | chr11 | 94455337  | 94455586  |
| chr11 | 75462486 | 75462686 | chr11 | 94536261  | 94536361  |
| chr11 | 75490018 | 75490218 | chr11 | 94814656  | 94814856  |
| chr11 | 75542257 | 75542357 | chr11 | 94840907  | 94841056  |
| chr11 | 76321177 | 76321477 | chr11 | 94983401  | 94983501  |
| chr11 | 76382332 | 76382632 | chr11 | 95052301  | 95052650  |
| chr11 | 76388585 | 76389085 | chr11 | 95420309  | 95420409  |
| chr11 | 76482778 | 76483278 | chr11 | 95494136  | 95494285  |
| chr11 | 76488681 | 76488930 | chr11 | 95495136  | 95495485  |
| chr11 | 76888744 | 76889293 | chr11 | 95820909  | 95821358  |
| chr11 | 76962838 | 76962929 | chr11 | 95971948  | 95972348  |
| chr11 | 77026945 | 77027045 | chr11 | 96208698  | 96208798  |
| chr11 | 77027394 | 77027594 | chr11 | 96258633  | 96259633  |
| chr11 | 77273321 | 77273421 | chr11 | 96272395  | 96272744  |
| chr11 | 77284130 | 77284430 | chr11 | 96684269  | 96684627  |
| chr11 | 77325287 | 77325487 | chr11 | 96756316  | 96756416  |
| chr11 | 77586673 | 77587682 | chr11 | 97021867  | 97022067  |
| chr11 | 77741651 | 77742100 | chr11 | 97094797  | 97094897  |
| chr11 | 77924434 | 77924634 | chr11 | 97606484  | 97606684  |
| chr11 | 77926034 | 77926283 | chr11 | 97607033  | 97607133  |
| chr11 | 77976785 | 77976988 | chr11 | 97893367  | 97893467  |
| chr11 | 77977936 | 77978285 | chr11 | 97933463  | 97933563  |
| chr11 | 77989624 | 77989724 | chr11 | 98099644  | 98099993  |
| chr11 | 78137230 | 78137981 | chr11 | 98109471  | 98109571  |
| chr11 | 78153930 | 78154530 | chr11 | 98293418  | 98293518  |
| chr11 | 78154679 | 78154779 | chr11 | 98306441  | 98306890  |
| chr11 | 78196867 | 78196967 | chr11 | 98319021  | 98319121  |
| chr11 | 78197316 | 78198416 | chr11 | 98531598  | 98531698  |
| chr11 | 78233094 | 78233243 | chr11 | 98570688  | 98570837  |
| chr11 | 78323004 | 78323104 | chr11 | 98589291  | 98589391  |
| chr11 | 78347393 | 78347493 | chr11 | 98701353  | 98701453  |
| chr11 | 78361244 | 78361644 | chr11 | 98710842  | 98711142  |
| chr11 | 78362094 | 78362193 | chr11 | 98844107  | 98844207  |
| chr11 | 78507682 | 78507782 | chr11 | 98930353  | 98930502  |
| chr11 | 78562038 | 78562138 | chr11 | 99295640  | 99295840  |
| chr11 | 78562387 | 78562487 | chr11 | 99491115  | 99491364  |
| chr11 | 78797162 | 78797523 | chr11 | 99922250  | 99922450  |
| chr11 | 78956670 | 78956719 | chr11 | 100157340 | 100157389 |

|       |          |          |       |           |           |
|-------|----------|----------|-------|-----------|-----------|
| chr11 | 79341768 | 79342320 | chr11 | 100169076 | 100169476 |
| chr11 | 79402020 | 79402220 | chr11 | 100262374 | 100262474 |
| chr11 | 79964870 | 79964970 | chr11 | 100348810 | 100348913 |
| chr11 | 80019522 | 80019622 | chr11 | 100434044 | 100434344 |
| chr11 | 80020171 | 80020271 | chr11 | 100610709 | 100610858 |
| chr11 | 80287381 | 80287481 | chr11 | 100611509 | 100611709 |
| chr11 | 80783923 | 80784272 | chr11 | 100618939 | 100619339 |
| chr11 | 80964261 | 80964561 | chr11 | 100644628 | 100644977 |
| chr11 | 81867530 | 81868030 | chr11 | 100976463 | 100976563 |
| chr11 | 81990923 | 81991072 | chr11 | 100984501 | 100984602 |
| chr11 | 82198557 | 82199008 | chr11 | 100984848 | 100984948 |
| chr11 | 82574959 | 82575059 | chr11 | 101001441 | 101001641 |
| chr11 | 82682861 | 82683061 | chr11 | 101002390 | 101002490 |
| chr11 | 83220629 | 83220929 | chr11 | 101026168 | 101026268 |
| chr11 | 83239964 | 83240264 | chr11 | 101026417 | 101026517 |
| chr11 | 83273370 | 83273470 | chr11 | 101062358 | 101062907 |
| chr11 | 83273819 | 83273919 | chr11 | 101077096 | 101077196 |
| chr11 | 83284216 | 83284365 | chr11 | 101077845 | 101077945 |
| chr11 | 84004272 | 84004725 | chr11 | 101165448 | 101165548 |
| chr11 | 84639773 | 84639922 | chr11 | 101208305 | 101208754 |
| chr11 | 84703403 | 84704403 | chr11 | 101222677 | 101223226 |
| chr11 | 84704652 | 84704752 | chr11 | 101331871 | 101331971 |
| chr11 | 85699520 | 85700671 | chr11 | 101571598 | 101573003 |
| chr11 | 86782967 | 86784618 | chr11 | 101691301 | 101691501 |
| chr11 | 87169852 | 87170152 | chr11 | 101932943 | 101933443 |
| chr11 | 87508805 | 87509154 | chr11 | 101933592 | 101933892 |
| chr11 | 87686440 | 87686889 | chr11 | 101946585 | 101947041 |
| chr11 | 87700203 | 87700452 | chr11 | 102132977 | 102133226 |
| chr11 | 87704431 | 87705431 | chr11 | 102271602 | 102272402 |
| chr11 | 87725562 | 87725666 | chr11 | 102313910 | 102314110 |
| chr11 | 87798463 | 87798563 | chr11 | 102355792 | 102355941 |
| chr11 | 88015575 | 88015675 | chr11 | 102376182 | 102376431 |
| chr11 | 88401556 | 88401656 | chr11 | 102742982 | 102743182 |
| chr11 | 88873455 | 88873604 | chr11 | 102790306 | 102790406 |
| chr11 | 88966423 | 88966623 | chr11 | 102803918 | 102804569 |
| chr11 | 89209407 | 89209507 | chr11 | 102805318 | 102805418 |
| chr11 | 89324986 | 89325435 | chr11 | 102923185 | 102923634 |
| chr11 | 89909103 | 89909252 | chr11 | 103078192 | 103078392 |
| chr11 | 89934885 | 89934985 | chr11 | 103124470 | 103124570 |
| chr11 | 90156015 | 90156115 | chr11 | 103124719 | 103124770 |
| chr11 | 90544610 | 90544759 | chr11 | 103270071 | 103270271 |
| chr11 | 90545059 | 90545159 | chr11 | 103318702 | 103318802 |
| chr11 | 93792853 | 93793004 | chr11 | 103680261 | 103680510 |

|       |          |          |       |           |           |
|-------|----------|----------|-------|-----------|-----------|
| chr11 | 93902531 | 93902631 | chr11 | 103860543 | 103860843 |
| chr11 | 94382063 | 94382212 | chr11 | 104137673 | 104137773 |
| chr11 | 94391997 | 94392097 | chr11 | 105032924 | 105033024 |
| chr11 | 94407861 | 94408410 | chr11 | 105198547 | 105198947 |
| chr11 | 94418971 | 94419420 | chr11 | 105199396 | 105199496 |
| chr11 | 94455737 | 94455886 | chr11 | 105881245 | 105881494 |
| chr11 | 94470112 | 94470512 | chr11 | 105912740 | 105912940 |
| chr11 | 94507824 | 94508224 | chr11 | 105943409 | 105943609 |
| chr11 | 94897849 | 94898198 | chr11 | 105972481 | 105972830 |
| chr11 | 94915416 | 94916217 | chr11 | 105990739 | 105990839 |
| chr11 | 94953244 | 94953493 | chr11 | 106100086 | 106100535 |
| chr11 | 95016328 | 95016477 | chr11 | 106181809 | 106182309 |
| chr11 | 95166066 | 95166415 | chr11 | 106182658 | 106183058 |
| chr11 | 95216239 | 95216488 | chr11 | 106695887 | 106695987 |
| chr11 | 95289759 | 95290008 | chr11 | 106905712 | 106905812 |
| chr11 | 95421358 | 95422109 | chr11 | 107385675 | 107386175 |
| chr11 | 95422658 | 95422758 | chr11 | 107386324 | 107386424 |
| chr11 | 95606141 | 95606581 | chr11 | 107453497 | 107453698 |
| chr11 | 95606830 | 95607354 | chr11 | 107623163 | 107623363 |
| chr11 | 95747807 | 95749056 | chr11 | 107624114 | 107624214 |
| chr11 | 95749807 | 95750307 | chr11 | 108826203 | 108826503 |
| chr11 | 95750564 | 95750667 | chr11 | 109269404 | 109269504 |
| chr11 | 96101247 | 96101347 | chr11 | 109332734 | 109332834 |
| chr11 | 96177646 | 96177746 | chr11 | 109380633 | 109380733 |
| chr11 | 96248146 | 96248246 | chr11 | 109557286 | 109557386 |
| chr11 | 96248395 | 96248495 | chr11 | 109902654 | 109903012 |
| chr11 | 96258284 | 96258484 | chr11 | 113589947 | 113590047 |
| chr11 | 96370262 | 96371311 | chr11 | 113590996 | 113591096 |
| chr11 | 96695696 | 96695896 | chr11 | 113616707 | 113617307 |
| chr11 | 96734542 | 96734642 | chr11 | 113972389 | 113972589 |
| chr11 | 96736193 | 96736293 | chr11 | 113973738 | 113973838 |
| chr11 | 96824519 | 96824676 | chr11 | 114581254 | 114581805 |
| chr11 | 96835661 | 96835761 | chr11 | 114582054 | 114582454 |
| chr11 | 96835910 | 96836310 | chr11 | 115059771 | 115060271 |
| chr11 | 96860257 | 96860357 | chr11 | 115060722 | 115061071 |
| chr11 | 96920306 | 96920562 | chr11 | 115069840 | 115069940 |
| chr11 | 96934631 | 96934931 | chr11 | 115093862 | 115094211 |
| chr11 | 96946423 | 96946572 | chr11 | 115204001 | 115204101 |
| chr11 | 97055750 | 97055899 | chr11 | 115227956 | 115228205 |
| chr11 | 97056950 | 97057350 | chr11 | 115229056 | 115229956 |
| chr11 | 97481917 | 97482368 | chr11 | 115240116 | 115240265 |
| chr11 | 97610184 | 97610433 | chr11 | 115326736 | 115326887 |
| chr11 | 97650742 | 97650942 | chr11 | 115399601 | 115399808 |

|       |          |          |       |           |           |
|-------|----------|----------|-------|-----------|-----------|
| chr11 | 97651491 | 97651591 | chr11 | 115510837 | 115511237 |
| chr11 | 97674594 | 97674953 | chr11 | 115519190 | 115519290 |
| chr11 | 97682605 | 97682707 | chr11 | 115614984 | 115615384 |
| chr11 | 97688660 | 97688760 | chr11 | 115672255 | 115672504 |
| chr11 | 97929012 | 97929412 | chr11 | 115719630 | 115719730 |
| chr11 | 97990305 | 97990459 | chr11 | 115720079 | 115720179 |
| chr11 | 97991405 | 97991505 | chr11 | 115806971 | 115807175 |
| chr11 | 97992354 | 97992654 | chr11 | 115881765 | 115881865 |
| chr11 | 98109071 | 98109220 | chr11 | 115919065 | 115919265 |
| chr11 | 98109620 | 98109820 | chr11 | 115930790 | 115930990 |
| chr11 | 98235932 | 98236232 | chr11 | 115936765 | 115936865 |
| chr11 | 98254575 | 98254775 | chr11 | 116105083 | 116105432 |
| chr11 | 98291369 | 98291818 | chr11 | 116146035 | 116146384 |
| chr11 | 98292469 | 98292569 | chr11 | 116212711 | 116212911 |
| chr11 | 98345408 | 98345508 | chr11 | 116213060 | 116213160 |
| chr11 | 98345858 | 98346057 | chr11 | 116213911 | 116214311 |
| chr11 | 98457289 | 98457489 | chr11 | 116241785 | 116241985 |
| chr11 | 98457938 | 98458138 | chr11 | 116439284 | 116439484 |
| chr11 | 98532747 | 98533047 | chr11 | 116440333 | 116440633 |
| chr11 | 98605950 | 98606550 | chr11 | 116441384 | 116441733 |
| chr11 | 98648210 | 98648310 | chr11 | 116535257 | 116535457 |
| chr11 | 98770595 | 98770795 | chr11 | 116576206 | 116576306 |
| chr11 | 98812826 | 98812975 | chr11 | 116734633 | 116734733 |
| chr11 | 98889503 | 98890403 | chr11 | 116749437 | 116749537 |
| chr11 | 98931453 | 98931553 | chr11 | 116749986 | 116750186 |
| chr11 | 98947597 | 98947797 | chr11 | 116758552 | 116758652 |
| chr11 | 98995540 | 98996140 | chr11 | 116760201 | 116760301 |
| chr11 | 98996589 | 98997189 | chr11 | 117236857 | 117237357 |
| chr11 | 99061814 | 99062063 | chr11 | 117389105 | 117389454 |
| chr11 | 99137055 | 99137504 | chr11 | 117686646 | 117686846 |
| chr11 | 99138707 | 99139116 | chr11 | 117731210 | 117731310 |
| chr11 | 99152122 | 99152518 | chr11 | 117755274 | 117755374 |
| chr11 | 99244657 | 99244963 | chr11 | 117755823 | 117756023 |
| chr11 | 99257581 | 99257881 | chr11 | 117779519 | 117779668 |
| chr11 | 99344844 | 99345052 | chr11 | 117781219 | 117781419 |
| chr11 | 99399697 | 99399797 | chr11 | 117875867 | 117876368 |
| chr11 | 99427296 | 99427396 | chr11 | 117877518 | 117877567 |
| chr11 | 99427749 | 99427845 | chr11 | 118155247 | 118155347 |
| chr11 | 99449445 | 99449745 | chr11 | 118308269 | 118308618 |
| chr11 | 99489715 | 99490164 | chr11 | 118340739 | 118340839 |
| chr11 | 99550327 | 99550476 | chr11 | 118929267 | 118929467 |
| chr11 | 99715934 | 99716083 | chr11 | 118947251 | 118947451 |
| chr11 | 99922599 | 99923550 | chr11 | 119135258 | 119135458 |

|       |           |           |       |           |           |
|-------|-----------|-----------|-------|-----------|-----------|
| chr11 | 99924409  | 99924699  | chr11 | 119136409 | 119136863 |
| chr11 | 100002812 | 100003312 | chr11 | 119172882 | 119173131 |
| chr11 | 100004263 | 100004512 | chr11 | 119174782 | 119175031 |
| chr11 | 100027533 | 100027982 | chr11 | 119206730 | 119206830 |
| chr11 | 100042045 | 100043445 | chr11 | 119262243 | 119262343 |
| chr11 | 100051957 | 100052406 | chr11 | 119454612 | 119454912 |
| chr11 | 100114597 | 100114997 | chr11 | 119455912 | 119456063 |
| chr11 | 100155389 | 100155589 | chr11 | 119510030 | 119510230 |
| chr11 | 100157140 | 100157289 | chr11 | 119952753 | 119952853 |
| chr11 | 100177062 | 100178258 | chr11 | 119993505 | 119993605 |
| chr11 | 100226469 | 100226569 | chr11 | 120057512 | 120057612 |
| chr11 | 100303977 | 100304177 | chr11 | 120057761 | 120057961 |
| chr11 | 100304326 | 100304526 | chr11 | 120091286 | 120091386 |
| chr11 | 100305691 | 100305791 | chr11 | 120184973 | 120185573 |
| chr11 | 100321483 | 100322083 | chr11 | 120284655 | 120285155 |
| chr11 | 100323134 | 100323283 | chr11 | 120285304 | 120285504 |
| chr11 | 100348361 | 100348761 | chr11 | 120343706 | 120343806 |
| chr11 | 100435093 | 100435193 | chr11 | 120344055 | 120344456 |
| chr11 | 100529206 | 100529655 | chr11 | 120362766 | 120362966 |
| chr11 | 100557131 | 100557280 | chr11 | 120364566 | 120365115 |
| chr11 | 100620190 | 100620839 | chr11 | 120373528 | 120373628 |
| chr11 | 100728866 | 100729015 | chr11 | 120391155 | 120391206 |
| chr11 | 100845998 | 100846198 | chr11 | 120398109 | 120398409 |
| chr11 | 100876655 | 100877955 | chr11 | 120435809 | 120436260 |
| chr11 | 100878104 | 100878304 | chr11 | 120456492 | 120456943 |
| chr11 | 100992796 | 100994296 | chr11 | 120505023 | 120505223 |
| chr11 | 101152771 | 101153020 | chr11 | 120523928 | 120524428 |
| chr11 | 101166948 | 101167048 | chr11 | 120551642 | 120551842 |
| chr11 | 101184289 | 101184489 | chr11 | 120582757 | 120582906 |
| chr11 | 101185640 | 101185940 | chr11 | 120626854 | 120628138 |
| chr11 | 101186191 | 101186391 | chr11 | 120633318 | 120633467 |
| chr11 | 101231700 | 101232049 | chr11 | 120633618 | 120633967 |
| chr11 | 101323971 | 101324126 | chr11 | 120639533 | 120639882 |
| chr11 | 101325399 | 101325650 | chr11 | 120691101 | 120691301 |
| chr11 | 101331222 | 101331822 | chr11 | 120731529 | 120731829 |
| chr11 | 101348852 | 101349101 | chr11 | 120855472 | 120855772 |
| chr11 | 101374637 | 101374737 | chr11 | 120970107 | 120970356 |
| chr11 | 101375088 | 101375304 | chr11 | 121024915 | 121025168 |
| chr11 | 101691750 | 101691850 | chr11 | 121135603 | 121135752 |
| chr11 | 101873053 | 101873153 | chr11 | 121144039 | 121144240 |
| chr11 | 101873402 | 101873602 | chr11 | 121425889 | 121426192 |
| chr11 | 101891457 | 101891557 | chr10 | 3557681   | 3557881   |
| chr11 | 102052324 | 102052424 | chr10 | 4423799   | 4423899   |



|       |           |           |       |          |          |
|-------|-----------|-----------|-------|----------|----------|
| chr11 | 102091294 | 102091543 | chr10 | 4522230  | 4522330  |
| chr11 | 102131626 | 102131726 | chr10 | 4541030  | 4541430  |
| chr11 | 102174960 | 102175160 | chr10 | 5915576  | 5915828  |
| chr11 | 102223212 | 102223412 | chr10 | 6473933  | 6474326  |
| chr11 | 102271153 | 102271553 | chr10 | 9424114  | 9424214  |
| chr11 | 102299913 | 102300013 | chr10 | 10307113 | 10307462 |
| chr11 | 102354230 | 102354330 | chr10 | 12611352 | 12611652 |
| chr11 | 102510472 | 102510872 | chr10 | 13073674 | 13073823 |
| chr11 | 102667743 | 102667843 | chr10 | 13618293 | 13618393 |
| chr11 | 102742433 | 102742633 | chr10 | 19601604 | 19601704 |
| chr11 | 102790455 | 102790755 | chr10 | 19657445 | 19657694 |
| chr11 | 102792055 | 102792155 | chr10 | 19683867 | 19683967 |
| chr11 | 102853448 | 102853548 | chr10 | 20298373 | 20298473 |
| chr11 | 103008060 | 103008260 | chr10 | 20702961 | 20703310 |
| chr11 | 103021469 | 103021719 | chr10 | 21057146 | 21057572 |
| chr11 | 103023119 | 103023319 | chr10 | 21125686 | 21125842 |
| chr11 | 103077134 | 103077234 | chr10 | 21126835 | 21127037 |
| chr11 | 103124919 | 103125019 | chr10 | 21439840 | 21439940 |
| chr11 | 103125970 | 103126419 | chr10 | 21743791 | 21744094 |
| chr11 | 103251340 | 103252289 | chr10 | 21744743 | 21744843 |
| chr11 | 103269522 | 103269622 | chr10 | 22482049 | 22482149 |
| chr11 | 103271522 | 103271871 | chr10 | 23100748 | 23100848 |
| chr11 | 103555846 | 103556146 | chr10 | 23537045 | 23537345 |
| chr11 | 103556295 | 103556495 | chr10 | 23670850 | 23671052 |
| chr11 | 103656308 | 103656508 | chr10 | 23698253 | 23698753 |
| chr11 | 103678861 | 103679010 | chr10 | 23721015 | 23721115 |
| chr11 | 103860094 | 103860194 | chr10 | 23735542 | 23735791 |
| chr11 | 103873108 | 103873208 | chr10 | 23899364 | 23899664 |
| chr11 | 104038619 | 104038719 | chr10 | 23899913 | 23900023 |
| chr11 | 104512993 | 104513449 | chr10 | 23973723 | 23974023 |
| chr11 | 105296876 | 105297528 | chr10 | 25828995 | 25829195 |
| chr11 | 105362962 | 105363111 | chr10 | 27824815 | 27825015 |
| chr11 | 105874196 | 105874296 | chr10 | 27825364 | 27825464 |
| chr11 | 105912989 | 105913940 | chr10 | 30368362 | 30368511 |
| chr11 | 105914807 | 105915107 | chr10 | 30552934 | 30553034 |
| chr11 | 105941409 | 105942158 | chr10 | 30553283 | 30553383 |
| chr11 | 106099686 | 106099935 | chr10 | 31063100 | 31064049 |
| chr11 | 106174309 | 106174812 | chr10 | 31195966 | 31196066 |
| chr11 | 106207848 | 106207948 | chr10 | 33374596 | 33375045 |
| chr11 | 106208097 | 106208397 | chr10 | 33769961 | 33770161 |
| chr11 | 106256478 | 106256877 | chr10 | 33878117 | 33878220 |
| chr11 | 106288679 | 106289232 | chr10 | 34139431 | 34139785 |
| chr11 | 106290479 | 106290679 | chr10 | 34168824 | 34169176 |

|       |           |           |       |          |          |
|-------|-----------|-----------|-------|----------|----------|
| chr11 | 106394283 | 106394383 | chr10 | 36725088 | 36725188 |
| chr11 | 106519717 | 106520017 | chr10 | 38885530 | 38885630 |
| chr11 | 106656605 | 106656805 | chr10 | 38885784 | 38885879 |
| chr11 | 106826433 | 106826533 | chr10 | 39774964 | 39775213 |
| chr11 | 107377007 | 107377107 | chr10 | 40099432 | 40099532 |
| chr11 | 107622714 | 107623114 | chr10 | 40434378 | 40434578 |
| chr11 | 107624663 | 107624814 | chr10 | 40634470 | 40634870 |
| chr11 | 107818049 | 107818449 | chr10 | 40822281 | 40822430 |
| chr11 | 108250515 | 108250715 | chr10 | 41241037 | 41241137 |
| chr11 | 109320556 | 109320905 | chr10 | 41638745 | 41638994 |
| chr11 | 109331885 | 109332285 | chr10 | 42028839 | 42029039 |
| chr11 | 109518376 | 109518476 | chr10 | 42029688 | 42029888 |
| chr11 | 109629594 | 109630749 | chr10 | 42229611 | 42229860 |
| chr11 | 110075691 | 110075850 | chr10 | 42252074 | 42252474 |
| chr11 | 110972302 | 110972451 | chr10 | 42334285 | 42334734 |
| chr11 | 112688665 | 112689214 | chr10 | 42925952 | 42926052 |
| chr11 | 113473406 | 113473706 | chr10 | 42972481 | 42973030 |
| chr11 | 113474055 | 113474255 | chr10 | 43229536 | 43229636 |
| chr11 | 114355298 | 114355447 | chr10 | 43291891 | 43292740 |
| chr11 | 114580605 | 114581105 | chr10 | 43329577 | 43329877 |
| chr11 | 114704079 | 114704179 | chr10 | 44019754 | 44020003 |
| chr11 | 114796478 | 114796927 | chr10 | 44818210 | 44818310 |
| chr11 | 114896924 | 114897283 | chr10 | 45040626 | 45040875 |
| chr11 | 115060522 | 115060671 | chr10 | 45086758 | 45086858 |
| chr11 | 115173630 | 115174581 | chr10 | 45237826 | 45237926 |
| chr11 | 115213100 | 115213449 | chr10 | 52297204 | 52297285 |
| chr11 | 115230305 | 115230405 | chr10 | 52441801 | 52441901 |
| chr11 | 115240516 | 115240816 | chr10 | 57237282 | 57237531 |
| chr11 | 115422108 | 115422489 | chr10 | 57238031 | 57238131 |
| chr11 | 115443117 | 115443817 | chr10 | 57283603 | 57283904 |
| chr11 | 115721130 | 115721330 | chr10 | 57382877 | 57383226 |
| chr11 | 115730150 | 115730250 | chr10 | 57545796 | 57546045 |
| chr11 | 115806522 | 115806722 | chr10 | 57785664 | 57785813 |
| chr11 | 115880016 | 115880573 | chr10 | 58933023 | 58933372 |
| chr11 | 115880716 | 115880916 | chr10 | 58933523 | 58933823 |
| chr11 | 116016895 | 116016995 | chr10 | 59232473 | 59232773 |
| chr11 | 116018046 | 116018146 | chr10 | 59233122 | 59233222 |
| chr11 | 116037715 | 116038566 | chr10 | 59808019 | 59808268 |
| chr11 | 116045120 | 116045369 | chr10 | 60284416 | 60284665 |
| chr11 | 116144035 | 116144435 | chr10 | 60361769 | 60361869 |
| chr11 | 116145084 | 116145484 | chr10 | 60886324 | 60886886 |
| chr11 | 116187676 | 116187825 | chr10 | 60948239 | 60948439 |
| chr11 | 116214660 | 116214762 | chr10 | 60982308 | 60982508 |

|       |           |           |       |          |          |
|-------|-----------|-----------|-------|----------|----------|
| chr11 | 116242240 | 116242340 | chr10 | 61005871 | 61006171 |
| chr11 | 116338950 | 116339209 | chr10 | 61178559 | 61178659 |
| chr11 | 116339250 | 116339507 | chr10 | 61210459 | 61210559 |
| chr11 | 116340474 | 116340574 | chr10 | 61641201 | 61641401 |
| chr11 | 116361034 | 116362334 | chr10 | 61663128 | 61663477 |
| chr11 | 116437884 | 116438233 | chr10 | 61763006 | 61763155 |
| chr11 | 116561200 | 116561600 | chr10 | 61979632 | 61979832 |
| chr11 | 116576555 | 116577055 | chr10 | 62016391 | 62016491 |
| chr11 | 116735684 | 116736384 | chr10 | 62016740 | 62016791 |
| chr11 | 116825100 | 116825200 | chr10 | 62016940 | 62017040 |
| chr11 | 117020786 | 117021686 | chr10 | 62108096 | 62108445 |
| chr11 | 117237406 | 117237506 | chr10 | 62322444 | 62322544 |
| chr11 | 117389505 | 117389605 | chr10 | 62475391 | 62475550 |
| chr11 | 117390054 | 117390162 | chr10 | 62475791 | 62476142 |
| chr11 | 117686895 | 117686995 | chr10 | 62509861 | 62510661 |
| chr11 | 117688746 | 117689346 | chr10 | 62510810 | 62510913 |
| chr11 | 117730561 | 117730761 | chr10 | 62553275 | 62553475 |
| chr11 | 117731010 | 117731161 | chr10 | 62590655 | 62591506 |
| chr11 | 118248538 | 118248838 | chr10 | 62591557 | 62591757 |
| chr11 | 118249887 | 118250487 | chr10 | 62592106 | 62592215 |
| chr11 | 118262298 | 118262498 | chr10 | 62630294 | 62630494 |
| chr11 | 118263549 | 118263898 | chr10 | 62773831 | 62774031 |
| chr11 | 118325090 | 118325939 | chr10 | 62869405 | 62869705 |
| chr11 | 118339790 | 118339990 | chr10 | 62960141 | 62960290 |
| chr11 | 118383844 | 118383953 | chr10 | 67066765 | 67066865 |
| chr11 | 118816059 | 118816359 | chr10 | 68253719 | 68253868 |
| chr11 | 118894125 | 118894325 | chr10 | 68882551 | 68883000 |
| chr11 | 118948300 | 118948500 | chr10 | 69970670 | 69971070 |
| chr11 | 118993728 | 118994428 | chr10 | 69971219 | 69971519 |
| chr11 | 119206081 | 119206281 | chr10 | 70128973 | 70129073 |
| chr11 | 119220424 | 119220524 | chr10 | 70767740 | 70767840 |
| chr11 | 119221373 | 119221573 | chr10 | 70874545 | 70875094 |
| chr11 | 119260094 | 119260543 | chr10 | 70877745 | 70877845 |
| chr11 | 119262794 | 119263094 | chr10 | 74448604 | 74448704 |
| chr11 | 119455463 | 119455763 | chr10 | 74711669 | 74712218 |
| chr11 | 119992856 | 119992956 | chr10 | 74805802 | 74806602 |
| chr11 | 119994702 | 119995154 | chr10 | 74998815 | 74999264 |
| chr11 | 120005338 | 120005438 | chr10 | 75055566 | 75055815 |
| chr11 | 120005787 | 120006187 | chr10 | 75125363 | 75126712 |
| chr11 | 120090129 | 120090635 | chr10 | 75254997 | 75255197 |
| chr11 | 120184273 | 120184522 | chr10 | 75303794 | 75304543 |
| chr11 | 120255571 | 120256522 | chr10 | 75403411 | 75403711 |
| chr11 | 120266320 | 120266471 | chr10 | 75414137 | 75414986 |

|       |           |           |       |          |          |
|-------|-----------|-----------|-------|----------|----------|
| chr11 | 120363218 | 120363515 | chr10 | 75455859 | 75456108 |
| chr11 | 120389856 | 120390255 | chr10 | 75513957 | 75514357 |
| chr11 | 120390606 | 120391106 | chr10 | 75924529 | 75924629 |
| chr11 | 120434909 | 120435258 | chr10 | 75948826 | 75949075 |
| chr11 | 120479823 | 120479923 | chr10 | 76011600 | 76011751 |
| chr11 | 120488234 | 120488534 | chr10 | 76043894 | 76044245 |
| chr11 | 120514846 | 120515146 | chr10 | 76044394 | 76044494 |
| chr11 | 120515295 | 120515495 | chr10 | 76057259 | 76057459 |
| chr11 | 120525877 | 120526088 | chr10 | 76514781 | 76514981 |
| chr11 | 120531005 | 120531654 | chr10 | 76647775 | 76647875 |
| chr11 | 120551991 | 120552191 | chr10 | 77063344 | 77063644 |
| chr11 | 120618710 | 120619459 | chr10 | 77086143 | 77086243 |
| chr11 | 120620110 | 120620210 | chr10 | 77087743 | 77087843 |
| chr11 | 120638033 | 120638433 | chr10 | 77103594 | 77103694 |
| chr11 | 120702433 | 120702533 | chr10 | 77352209 | 77352309 |
| chr11 | 120703082 | 120703182 | chr10 | 77415688 | 77416237 |
| chr11 | 120853021 | 120853270 | chr10 | 77501322 | 77501472 |
| chr11 | 120897720 | 120897820 | chr10 | 77531810 | 77531910 |
| chr11 | 120899171 | 120899625 | chr10 | 77565441 | 77565890 |
| chr11 | 120945656 | 120947105 | chr10 | 77692378 | 77692578 |
| chr11 | 120969707 | 120970056 | chr10 | 77875810 | 77876018 |
| chr11 | 120987144 | 120987293 | chr10 | 77934856 | 77935305 |
| chr11 | 121066525 | 121066725 | chr10 | 77948130 | 77948230 |
| chr11 | 121110986 | 121111286 | chr10 | 77948379 | 77948479 |
| chr11 | 121111435 | 121111635 | chr10 | 78096802 | 78097202 |
| chr11 | 121260902 | 121261002 | chr10 | 78619418 | 78619567 |
| chr11 | 121294832 | 121294932 | chr10 | 78619618 | 78619967 |
| chr11 | 121327213 | 121327764 | chr10 | 79057229 | 79057478 |
| chr11 | 121328313 | 121328413 | chr10 | 79136310 | 79136510 |
| chr11 | 121356988 | 121357039 | chr10 | 79168348 | 79168548 |
| chr11 | 121358639 | 121358988 | chr10 | 79299655 | 79300105 |
| chr11 | 121425640 | 121425740 | chr10 | 79315776 | 79316176 |
| chr11 | 121608464 | 121608764 | chr10 | 79316325 | 79316525 |
| chr10 | 3557432   | 3557532   | chr10 | 79397044 | 79397144 |
| chr10 | 4540481   | 4540681   | chr10 | 79408551 | 79408651 |
| chr10 | 4795454   | 4796303   | chr10 | 79409000 | 79409100 |
| chr10 | 5277662   | 5278011   | chr10 | 79430902 | 79431503 |
| chr10 | 6081334   | 6081426   | chr10 | 79441047 | 79441196 |
| chr10 | 6374738   | 6375138   | chr10 | 79448932 | 79449332 |
| chr10 | 6475577   | 6475727   | chr10 | 79482245 | 79482345 |
| chr10 | 6981440   | 6981640   | chr10 | 79510694 | 79511194 |
| chr10 | 7531259   | 7531608   | chr10 | 79511343 | 79511443 |
| chr10 | 7579875   | 7580124   | chr10 | 79541645 | 79541745 |

|       |          |          |       |          |          |
|-------|----------|----------|-------|----------|----------|
| chr10 | 7674968  | 7675068  | chr10 | 79575648 | 79576048 |
| chr10 | 8635193  | 8635493  | chr10 | 79637862 | 79638062 |
| chr10 | 8635642  | 8635742  | chr10 | 79664925 | 79665074 |
| chr10 | 9425063  | 9425263  | chr10 | 79670550 | 79670650 |
| chr10 | 10898830 | 10899030 | chr10 | 79670799 | 79671099 |
| chr10 | 12611704 | 12612801 | chr10 | 79787057 | 79787157 |
| chr10 | 12838422 | 12839122 | chr10 | 79843778 | 79843878 |
| chr10 | 12942036 | 12942285 | chr10 | 79908988 | 79909288 |
| chr10 | 14294450 | 14294650 | chr10 | 79910137 | 79910337 |
| chr10 | 14454403 | 14454752 | chr10 | 80083398 | 80083948 |
| chr10 | 17473790 | 17473895 | chr10 | 80193837 | 80194037 |
| chr10 | 17698312 | 17698412 | chr10 | 80319944 | 80320144 |
| chr10 | 18538245 | 18538745 | chr10 | 80366641 | 80366841 |
| chr10 | 18593266 | 18593366 | chr10 | 80368041 | 80368141 |
| chr10 | 18593623 | 18593766 | chr10 | 80440066 | 80440415 |
| chr10 | 18593924 | 18595166 | chr10 | 80440566 | 80440715 |
| chr10 | 18765563 | 18766012 | chr10 | 80451058 | 80452107 |
| chr10 | 19340382 | 19340531 | chr10 | 80582364 | 80582764 |
| chr10 | 19342482 | 19342639 | chr10 | 80621682 | 80622582 |
| chr10 | 20062164 | 20062264 | chr10 | 80628323 | 80628423 |
| chr10 | 20296624 | 20297224 | chr10 | 80658435 | 80658535 |
| chr10 | 20297573 | 20298124 | chr10 | 80752640 | 80752740 |
| chr10 | 20902780 | 20902940 | chr10 | 80753189 | 80754140 |
| chr10 | 21055846 | 21056295 | chr10 | 80813944 | 80814046 |
| chr10 | 21125986 | 21126286 | chr10 | 80849140 | 80849240 |
| chr10 | 21342853 | 21342953 | chr10 | 80872920 | 80873020 |
| chr10 | 22395675 | 22395776 | chr10 | 80879770 | 80880070 |
| chr10 | 23099599 | 23099699 | chr10 | 80900331 | 80900631 |
| chr10 | 23100148 | 23100199 | chr10 | 80901080 | 80901180 |
| chr10 | 23669801 | 23669950 | chr10 | 80905071 | 80905434 |
| chr10 | 23670101 | 23670701 | chr10 | 80906871 | 80907320 |
| chr10 | 23698808 | 23699006 | chr10 | 81123061 | 81123210 |
| chr10 | 23710689 | 23710789 | chr10 | 81425671 | 81425821 |
| chr10 | 23859679 | 23859785 | chr10 | 82125171 | 82125571 |
| chr10 | 24462247 | 24462347 | chr10 | 82259332 | 82259432 |
| chr10 | 24679576 | 24679676 | chr10 | 82259681 | 82259881 |
| chr10 | 25049708 | 25049808 | chr10 | 82480787 | 82480887 |
| chr10 | 25050959 | 25051108 | chr10 | 82855743 | 82855843 |
| chr10 | 25191582 | 25191882 | chr10 | 83144055 | 83144155 |
| chr10 | 26126230 | 26126330 | chr10 | 83935862 | 83936062 |
| chr10 | 30592779 | 30592979 | chr10 | 84029928 | 84030028 |
| chr10 | 30593428 | 30593528 | chr10 | 84072537 | 84072637 |
| chr10 | 31195817 | 31195917 | chr10 | 84072886 | 84073086 |

|       |          |          |       |           |           |
|-------|----------|----------|-------|-----------|-----------|
| chr10 | 33957247 | 33957396 | chr10 | 84117827  | 84118476  |
| chr10 | 34032738 | 34032887 | chr10 | 84413389  | 84413689  |
| chr10 | 36723039 | 36723588 | chr10 | 84882509  | 84882609  |
| chr10 | 36723939 | 36724439 | chr10 | 84882958  | 84883309  |
| chr10 | 38884321 | 38884670 | chr10 | 85412885  | 85412985  |
| chr10 | 39119784 | 39119884 | chr10 | 85452984  | 85453484  |
| chr10 | 39481555 | 39481655 | chr10 | 85517487  | 85517587  |
| chr10 | 39737291 | 39737700 | chr10 | 86201351  | 86201951  |
| chr10 | 40381083 | 40381532 | chr10 | 86988372  | 86988621  |
| chr10 | 41054287 | 41054387 | chr10 | 86989536  | 86989636  |
| chr10 | 41270007 | 41270107 | chr10 | 87631705  | 87631897  |
| chr10 | 41728341 | 41728891 | chr10 | 87852766  | 87852866  |
| chr10 | 42027539 | 42027739 | chr10 | 87875004  | 87875104  |
| chr10 | 42028188 | 42028288 | chr10 | 87875253  | 87875553  |
| chr10 | 42251525 | 42251625 | chr10 | 87999605  | 87999805  |
| chr10 | 42512522 | 42512722 | chr10 | 88102005  | 88102105  |
| chr10 | 42927003 | 42927152 | chr10 | 88102254  | 88102405  |
| chr10 | 44816410 | 44816759 | chr10 | 88381927  | 88382176  |
| chr10 | 45329087 | 45329187 | chr10 | 89001974  | 89002167  |
| chr10 | 51774233 | 51774332 | chr10 | 89240516  | 89240816  |
| chr10 | 51984715 | 51985015 | chr10 | 90577977  | 90578077  |
| chr10 | 52168696 | 52168796 | chr10 | 90578726  | 90579126  |
| chr10 | 53346257 | 53346807 | chr10 | 90619803  | 90619903  |
| chr10 | 57853385 | 57853934 | chr10 | 90667575  | 90667675  |
| chr10 | 58205684 | 58205984 | chr10 | 92949343  | 92949492  |
| chr10 | 58512259 | 58512408 | chr10 | 92984707  | 92984907  |
| chr10 | 58512559 | 58513359 | chr10 | 93136491  | 93136591  |
| chr10 | 58514409 | 58514512 | chr10 | 93326745  | 93327171  |
| chr10 | 59482458 | 59482758 | chr10 | 93532140  | 93532240  |
| chr10 | 59532847 | 59533396 | chr10 | 94184044  | 94184144  |
| chr10 | 59635995 | 59636544 | chr10 | 95009741  | 95010241  |
| chr10 | 59636595 | 59636844 | chr10 | 95436142  | 95436242  |
| chr10 | 59718346 | 59718804 | chr10 | 98603402  | 98603812  |
| chr10 | 59806376 | 59806725 | chr10 | 98757859  | 98757959  |
| chr10 | 59876442 | 59877391 | chr10 | 99510603  | 99511552  |
| chr10 | 60187772 | 60188921 | chr10 | 99983076  | 99983176  |
| chr10 | 60283365 | 60283865 | chr10 | 100084895 | 100085048 |
| chr10 | 60362620 | 60363270 | chr10 | 105044302 | 105044502 |
| chr10 | 60617697 | 60618246 | chr10 | 106964380 | 106964690 |
| chr10 | 60619697 | 60619946 | chr10 | 107631701 | 107631801 |
| chr10 | 60677238 | 60677538 | chr10 | 107801590 | 107801990 |
| chr10 | 60677787 | 60677887 | chr10 | 110389980 | 110390080 |
| chr10 | 60887035 | 60887886 | chr10 | 110479510 | 110479610 |

|       |          |          |       |           |           |
|-------|----------|----------|-------|-----------|-----------|
| chr10 | 60888035 | 60888135 | chr10 | 110950218 | 110950674 |
| chr10 | 61006220 | 61006320 | chr10 | 110975905 | 110976105 |
| chr10 | 61008071 | 61008171 | chr10 | 111442585 | 111443234 |
| chr10 | 61210708 | 61210808 | chr10 | 111740224 | 111740373 |
| chr10 | 61314852 | 61315158 | chr10 | 112397604 | 112397856 |
| chr10 | 61509596 | 61509896 | chr10 | 112398334 | 112398883 |
| chr10 | 61761455 | 61761555 | chr10 | 114720967 | 114721067 |
| chr10 | 61781994 | 61782094 | chr10 | 115285585 | 115286034 |
| chr10 | 61952496 | 61952845 | chr10 | 115488800 | 115488849 |
| chr10 | 61980081 | 61980532 | chr10 | 116050892 | 116050992 |
| chr10 | 61981281 | 61981581 | chr10 | 116366481 | 116366581 |
| chr10 | 62450771 | 62450871 | chr10 | 116420231 | 116420631 |
| chr10 | 66627345 | 66627545 | chr10 | 116694075 | 116694224 |
| chr10 | 69062563 | 69062964 | chr10 | 116708857 | 116708963 |
| chr10 | 69775215 | 69775323 | chr10 | 117217626 | 117217726 |
| chr10 | 70130222 | 70130422 | chr10 | 117218277 | 117218826 |
| chr10 | 70691079 | 70691179 | chr10 | 117263324 | 117263973 |
| chr10 | 70814929 | 70815129 | chr10 | 117317244 | 117318344 |
| chr10 | 71510390 | 71510539 | chr10 | 119290585 | 119290734 |
| chr10 | 74449353 | 74449453 | chr10 | 119584042 | 119584191 |
| chr10 | 74883238 | 74883488 | chr10 | 119672438 | 119672838 |
| chr10 | 75042153 | 75042353 | chr10 | 119698111 | 119698560 |
| chr10 | 75053466 | 75053715 | chr10 | 119948365 | 119949365 |
| chr10 | 75127063 | 75127512 | chr10 | 120504894 | 120504994 |
| chr10 | 75254648 | 75254948 | chr10 | 120834441 | 120834593 |
| chr10 | 75341973 | 75342073 | chr10 | 120835941 | 120836141 |
| chr10 | 75374171 | 75374471 | chr10 | 120947551 | 120947651 |
| chr10 | 75413737 | 75413986 | chr10 | 121210288 | 121210388 |
| chr10 | 75430185 | 75430434 | chr10 | 121210637 | 121210688 |
| chr10 | 75514806 | 75514906 | chr10 | 121919253 | 121919453 |
| chr10 | 75628324 | 75628873 | chr10 | 122668224 | 122668324 |
| chr10 | 75928917 | 75929717 | chr10 | 125436938 | 125437338 |
| chr10 | 76011400 | 76011552 | chr10 | 126372467 | 126372567 |
| chr10 | 76013102 | 76013402 | chr10 | 126548776 | 126548976 |
| chr10 | 76013751 | 76013851 | chr10 | 126682209 | 126682309 |
| chr10 | 76057708 | 76057808 | chr10 | 126682558 | 126683058 |
| chr10 | 76208718 | 76209218 | chr10 | 126734434 | 126734583 |
| chr10 | 76444116 | 76444518 | chr10 | 126759534 | 126759834 |
| chr10 | 76513932 | 76514132 | chr10 | 126792889 | 126792989 |
| chr10 | 76649624 | 76649724 | chr10 | 126795089 | 126795338 |
| chr10 | 76740773 | 76740873 | chr10 | 126823784 | 126824184 |
| chr10 | 76900096 | 76900296 | chr10 | 126971579 | 126971728 |
| chr10 | 77086492 | 77086892 | chr10 | 127092861 | 127093061 |

|       |          |          |       |           |           |
|-------|----------|----------|-------|-----------|-----------|
| chr10 | 77349960 | 77350460 | chr10 | 127138190 | 127138290 |
| chr10 | 77351009 | 77351460 | chr10 | 127147998 | 127148098 |
| chr10 | 77414237 | 77414337 | chr10 | 127320590 | 127320940 |
| chr10 | 77415388 | 77415488 | chr10 | 127368546 | 127368749 |
| chr10 | 77491418 | 77491667 | chr10 | 127529847 | 127529947 |
| chr10 | 77500522 | 77500971 | chr10 | 127664152 | 127664352 |
| chr10 | 77531959 | 77532359 | chr10 | 127740987 | 127741295 |
| chr10 | 77570952 | 77571073 | chr10 | 127770684 | 127771133 |
| chr10 | 77571622 | 77572622 | chr10 | 127808894 | 127809094 |
| chr10 | 77692029 | 77692129 | chr10 | 127880459 | 127881208 |
| chr10 | 77693429 | 77693729 | chr10 | 127882472 | 127882572 |
| chr10 | 78240654 | 78240955 | chr10 | 127883021 | 127883121 |
| chr10 | 78241005 | 78241154 | chr10 | 127965088 | 127965237 |
| chr10 | 79167699 | 79167848 | chr10 | 128036611 | 128036711 |
| chr10 | 79168099 | 79168199 | chr10 | 128037360 | 128037560 |
| chr10 | 79191770 | 79191870 | chr10 | 128061313 | 128061613 |
| chr10 | 79204155 | 79204255 | chr10 | 128144724 | 128145024 |
| chr10 | 79209380 | 79209680 | chr10 | 128145273 | 128145980 |
| chr10 | 79211429 | 79211829 | chr10 | 128167576 | 128168077 |
| chr10 | 79226709 | 79226809 | chr10 | 128176020 | 128176269 |
| chr10 | 79238794 | 79238894 | chr10 | 128215019 | 128215368 |
| chr10 | 79289834 | 79289934 | chr10 | 128391436 | 128391595 |
| chr10 | 79376854 | 79377054 | chr10 | 128394187 | 128394336 |
| chr10 | 79400027 | 79400276 | chr10 | 129128970 | 129129419 |
| chr10 | 79413172 | 79413621 | chr10 | 129164302 | 129164458 |
| chr10 | 79430753 | 79430853 | chr17 | 3128219   | 3128319   |
| chr10 | 79437431 | 79438131 | chr17 | 3600731   | 3600980   |
| chr10 | 79438496 | 79439147 | chr17 | 5462934   | 5463534   |
| chr10 | 79439596 | 79439796 | chr17 | 5484661   | 5485613   |
| chr10 | 79491784 | 79491933 | chr17 | 5535417   | 5535917   |
| chr10 | 79506523 | 79506672 | chr17 | 7341620   | 7341920   |
| chr10 | 79574148 | 79574297 | chr17 | 7342287   | 7342638   |
| chr10 | 79624712 | 79624912 | chr17 | 7537399   | 7537499   |
| chr10 | 79657244 | 79657844 | chr17 | 7728854   | 7728954   |
| chr10 | 79669350 | 79669599 | chr17 | 8492940   | 8493340   |
| chr10 | 79688201 | 79688450 | chr17 | 8713440   | 8713544   |
| chr10 | 79749035 | 79749235 | chr17 | 8831717   | 8831817   |
| chr10 | 79750486 | 79750586 | chr17 | 8858258   | 8858858   |
| chr10 | 79782973 | 79783073 | chr17 | 8944184   | 8944633   |
| chr10 | 79783922 | 79784422 | chr17 | 8980978   | 8981478   |
| chr10 | 79822198 | 79823447 | chr17 | 8982127   | 8982427   |
| chr10 | 79844727 | 79844827 | chr17 | 9348000   | 9348200   |
| chr10 | 79851330 | 79851679 | chr17 | 11382457  | 11382557  |



|       |          |          |       |          |          |
|-------|----------|----------|-------|----------|----------|
| chr10 | 79852730 | 79853079 | chr17 | 12661361 | 12661510 |
| chr10 | 79871573 | 79871673 | chr17 | 12861371 | 12861471 |
| chr10 | 79871822 | 79871922 | chr17 | 13050004 | 13050153 |
| chr10 | 79878123 | 79878423 | chr17 | 13126588 | 13126688 |
| chr10 | 79922089 | 79922289 | chr17 | 13313013 | 13313222 |
| chr10 | 79957268 | 79957417 | chr17 | 13509847 | 13510096 |
| chr10 | 80061585 | 80061734 | chr17 | 13555444 | 13555793 |
| chr10 | 80100304 | 80100704 | chr17 | 13585928 | 13586141 |
| chr10 | 80112614 | 80112714 | chr17 | 14816901 | 14817401 |
| chr10 | 80125542 | 80125691 | chr17 | 14935878 | 14936530 |
| chr10 | 80145447 | 80145647 | chr17 | 15944525 | 15945574 |
| chr10 | 80194186 | 80194586 | chr17 | 16069019 | 16069219 |
| chr10 | 80264521 | 80264621 | chr17 | 16096093 | 16096841 |
| chr10 | 80320894 | 80320994 | chr17 | 18400074 | 18400323 |
| chr10 | 80325608 | 80325708 | chr17 | 21514684 | 21514884 |
| chr10 | 80326857 | 80327057 | chr17 | 21515033 | 21515133 |
| chr10 | 80367592 | 80367692 | chr17 | 22531597 | 22531946 |
| chr10 | 80378066 | 80379117 | chr17 | 24112241 | 24112390 |
| chr10 | 80423955 | 80424255 | chr17 | 24221420 | 24221569 |
| chr10 | 80523226 | 80523326 | chr17 | 24309888 | 24310137 |
| chr10 | 80525075 | 80525126 | chr17 | 24347737 | 24347988 |
| chr10 | 80525280 | 80525575 | chr17 | 24390317 | 24390417 |
| chr10 | 80536886 | 80537035 | chr17 | 24400083 | 24400232 |
| chr10 | 80547987 | 80548187 | chr17 | 24413783 | 24413983 |
| chr10 | 80555773 | 80556173 | chr17 | 24752054 | 24752154 |
| chr10 | 80557022 | 80557422 | chr17 | 24797337 | 24797886 |
| chr10 | 80582015 | 80582215 | chr17 | 24897335 | 24897435 |
| chr10 | 80590510 | 80592762 | chr17 | 24961055 | 24961255 |
| chr10 | 80626423 | 80626523 | chr17 | 24972021 | 24972696 |
| chr10 | 80626774 | 80626872 | chr17 | 24989023 | 24989274 |
| chr10 | 80689784 | 80690033 | chr17 | 25001301 | 25001750 |
| chr10 | 80755540 | 80755989 | chr17 | 25016362 | 25016462 |
| chr10 | 80779105 | 80779205 | chr17 | 25020473 | 25020622 |
| chr10 | 80780154 | 80780354 | chr17 | 25024868 | 25025517 |
| chr10 | 80815208 | 80815308 | chr17 | 25034302 | 25034402 |
| chr10 | 80849291 | 80849640 | chr17 | 25096039 | 25096339 |
| chr10 | 80865227 | 80865327 | chr17 | 25179475 | 25179575 |
| chr10 | 80865776 | 80865976 | chr17 | 25190747 | 25190847 |
| chr10 | 80872271 | 80872371 | chr17 | 25235988 | 25236088 |
| chr10 | 80874371 | 80874720 | chr17 | 25277674 | 25278223 |
| chr10 | 80889351 | 80889651 | chr17 | 25298292 | 25298392 |
| chr10 | 80949334 | 80950883 | chr17 | 25298641 | 25299507 |
| chr10 | 81018566 | 81018666 | chr17 | 25397085 | 25397185 |

|       |          |          |       |          |          |
|-------|----------|----------|-------|----------|----------|
| chr10 | 81020017 | 81020467 | chr17 | 25425308 | 25425508 |
| chr10 | 81021998 | 81022147 | chr17 | 25439409 | 25439858 |
| chr10 | 81023299 | 81024166 | chr17 | 25441658 | 25441858 |
| chr10 | 81046435 | 81046535 | chr17 | 25442709 | 25443258 |
| chr10 | 81097592 | 81097741 | chr17 | 25506862 | 25506962 |
| chr10 | 81124061 | 81124410 | chr17 | 25561612 | 25561712 |
| chr10 | 81148995 | 81149195 | chr17 | 25679983 | 25680132 |
| chr10 | 81149844 | 81150595 | chr17 | 25768271 | 25768520 |
| chr10 | 81151244 | 81151344 | chr17 | 25891317 | 25891966 |
| chr10 | 82352869 | 82353118 | chr17 | 25981258 | 25981412 |
| chr10 | 82362248 | 82362348 | chr17 | 25981958 | 25982007 |
| chr10 | 82833557 | 82833657 | chr17 | 26044192 | 26044292 |
| chr10 | 83144504 | 83144804 | chr17 | 26116825 | 26117476 |
| chr10 | 83145455 | 83145655 | chr17 | 26118425 | 26118825 |
| chr10 | 83145904 | 83146207 | chr17 | 26275389 | 26275440 |
| chr10 | 83937011 | 83937514 | chr17 | 26300317 | 26300717 |
| chr10 | 83938062 | 83938116 | chr17 | 26340274 | 26340523 |
| chr10 | 84250638 | 84251388 | chr17 | 26374985 | 26375185 |
| chr10 | 84412940 | 84413340 | chr17 | 26379151 | 26379351 |
| chr10 | 84599113 | 84599413 | chr17 | 26379500 | 26379700 |
| chr10 | 84681194 | 84681294 | chr17 | 26414977 | 26415077 |
| chr10 | 86206608 | 86207057 | chr17 | 26421606 | 26421806 |
| chr10 | 86208108 | 86208508 | chr17 | 26492321 | 26492470 |
| chr10 | 86328543 | 86329443 | chr17 | 26492821 | 26493170 |
| chr10 | 86988672 | 86988772 | chr17 | 26668371 | 26668970 |
| chr10 | 86989136 | 86989387 | chr17 | 26790331 | 26790580 |
| chr10 | 87695746 | 87695848 | chr17 | 26799047 | 26799147 |
| chr10 | 87853015 | 87853315 | chr17 | 26989322 | 26989622 |
| chr10 | 87873502 | 87873651 | chr17 | 27055011 | 27055211 |
| chr10 | 87874004 | 87874156 | chr17 | 27262150 | 27262299 |
| chr10 | 87953277 | 87953626 | chr17 | 27327591 | 27327740 |
| chr10 | 87999056 | 87999156 | chr17 | 27463350 | 27463899 |
| chr10 | 88227385 | 88227534 | chr17 | 27485369 | 27485469 |
| chr10 | 89118089 | 89118204 | chr17 | 27486018 | 27486118 |
| chr10 | 89181625 | 89181825 | chr17 | 27603236 | 27603336 |
| chr10 | 92702839 | 92702945 | chr17 | 27603885 | 27604285 |
| chr10 | 92983158 | 92984558 | chr17 | 28110661 | 28110861 |
| chr10 | 93035280 | 93036029 | chr17 | 28113212 | 28113661 |
| chr10 | 94440708 | 94440908 | chr17 | 28201882 | 28202344 |
| chr10 | 94912550 | 94912750 | chr17 | 28230503 | 28230603 |
| chr10 | 94998407 | 94999064 | chr17 | 28231354 | 28231454 |
| chr10 | 96112306 | 96112406 | chr17 | 28626666 | 28626866 |
| chr10 | 97188338 | 97188438 | chr17 | 28627015 | 28627366 |

|       |           |           |       |          |          |
|-------|-----------|-----------|-------|----------|----------|
| chr10 | 98622205  | 98622305  | chr17 | 28687629 | 28687729 |
| chr10 | 98623257  | 98623854  | chr17 | 28688987 | 28689087 |
| chr10 | 98756810  | 98756910  | chr17 | 28723218 | 28723418 |
| chr10 | 98794068  | 98794368  | chr17 | 28752679 | 28752879 |
| chr10 | 99255487  | 99256038  | chr17 | 28778952 | 28779152 |
| chr10 | 99257087  | 99257196  | chr17 | 29032538 | 29032838 |
| chr10 | 102524559 | 102524817 | chr17 | 29077361 | 29077510 |
| chr10 | 105309680 | 105310331 | chr17 | 29121960 | 29122060 |
| chr10 | 105310882 | 105311182 | chr17 | 29122509 | 29122609 |
| chr10 | 106741832 | 106742281 | chr17 | 29168177 | 29168277 |
| chr10 | 106956785 | 106956885 | chr17 | 29168426 | 29168726 |
| chr10 | 108169843 | 108170043 | chr17 | 29314804 | 29314953 |
| chr10 | 108480221 | 108480770 | chr17 | 29315504 | 29315704 |
| chr10 | 111553655 | 111553804 | chr17 | 29404888 | 29405088 |
| chr10 | 111740773 | 111741273 | chr17 | 29461802 | 29461902 |
| chr10 | 114854197 | 114854497 | chr17 | 29462251 | 29462451 |
| chr10 | 115057644 | 115057844 | chr17 | 29499193 | 29499293 |
| chr10 | 115584430 | 115584941 | chr17 | 29554315 | 29554664 |
| chr10 | 116367608 | 116367959 | chr17 | 29579150 | 29579250 |
| chr10 | 116436167 | 116436267 | chr17 | 29579799 | 29579899 |
| chr10 | 116436416 | 116436626 | chr17 | 29639352 | 29639752 |
| chr10 | 116455064 | 116455474 | chr17 | 29640801 | 29641001 |
| chr10 | 116513956 | 116514856 | chr17 | 29681233 | 29681482 |
| chr10 | 116533367 | 116533516 | chr17 | 29681633 | 29682382 |
| chr10 | 117181784 | 117182084 | chr17 | 29785717 | 29786117 |
| chr10 | 117183135 | 117183384 | chr17 | 29810549 | 29811099 |
| chr10 | 117911765 | 117911865 | chr17 | 29894831 | 29894931 |
| chr10 | 119288863 | 119289185 | chr17 | 29907398 | 29907847 |
| chr10 | 119289345 | 119289534 | chr17 | 30096679 | 30096779 |
| chr10 | 119672289 | 119672389 | chr17 | 30097028 | 30097128 |
| chr10 | 119673989 | 119674089 | chr17 | 30207191 | 30207491 |
| chr10 | 119833722 | 119834088 | chr17 | 31499058 | 31499358 |
| chr10 | 119835139 | 119835488 | chr17 | 31710251 | 31710351 |
| chr10 | 121057299 | 121057499 | chr17 | 31744478 | 31744678 |
| chr10 | 121057648 | 121057956 | chr17 | 32064937 | 32065286 |
| chr10 | 121568503 | 121568703 | chr17 | 32182166 | 32182266 |
| chr10 | 121919702 | 121919753 | chr17 | 32203000 | 32203100 |
| chr10 | 122149670 | 122149870 | chr17 | 32203769 | 32203820 |
| chr10 | 125436095 | 125436395 | chr17 | 32221364 | 32221864 |
| chr10 | 126373218 | 126373418 | chr17 | 32400628 | 32401579 |
| chr10 | 126501626 | 126501726 | chr17 | 32724618 | 32724718 |
| chr10 | 126502982 | 126503131 | chr17 | 32855227 | 32855427 |
| chr10 | 126511094 | 126511548 | chr17 | 32855776 | 32856076 |

|       |           |           |       |          |          |
|-------|-----------|-----------|-------|----------|----------|
| chr10 | 126511994 | 126512194 | chr17 | 32923876 | 32923976 |
| chr10 | 126512343 | 126512443 | chr17 | 33700283 | 33700432 |
| chr10 | 126531296 | 126531696 | chr17 | 34383868 | 34384517 |
| chr10 | 126534647 | 126534796 | chr17 | 34574394 | 34574494 |
| chr10 | 126534847 | 126535047 | chr17 | 34595127 | 34595227 |
| chr10 | 126549525 | 126549776 | chr17 | 34616813 | 34616913 |
| chr10 | 126634387 | 126634548 | chr17 | 34621372 | 34621721 |
| chr10 | 126636303 | 126636603 | chr17 | 34623179 | 34623331 |
| chr10 | 126660882 | 126661404 | chr17 | 34665591 | 34665791 |
| chr10 | 126662753 | 126662953 | chr17 | 34666240 | 34666440 |
| chr10 | 126667972 | 126668276 | chr17 | 34691226 | 34691426 |
| chr10 | 126760283 | 126760483 | chr17 | 34694441 | 34694891 |
| chr10 | 126783102 | 126783355 | chr17 | 34698040 | 34698140 |
| chr10 | 126812642 | 126812891 | chr17 | 34785234 | 34785383 |
| chr10 | 126813142 | 126813291 | chr17 | 34787595 | 34787695 |
| chr10 | 126822635 | 126823235 | chr17 | 34851713 | 34852362 |
| chr10 | 126841542 | 126841642 | chr17 | 34853962 | 34854462 |
| chr10 | 126841993 | 126842142 | chr17 | 34862881 | 34863281 |
| chr10 | 126972136 | 126973131 | chr17 | 35275196 | 35275296 |
| chr10 | 127006171 | 127006371 | chr17 | 35292488 | 35292639 |
| chr10 | 127091898 | 127092098 | chr17 | 35309516 | 35309870 |
| chr10 | 127137741 | 127137841 | chr17 | 35312916 | 35313365 |
| chr10 | 127210300 | 127210400 | chr17 | 35411169 | 35411269 |
| chr10 | 127222356 | 127222456 | chr17 | 35503468 | 35503719 |
| chr10 | 127222611 | 127222805 | chr17 | 35547384 | 35547584 |
| chr10 | 127295746 | 127295895 | chr17 | 35559638 | 35559787 |
| chr10 | 127319290 | 127319539 | chr17 | 35637817 | 35637917 |
| chr10 | 127506639 | 127506739 | chr17 | 35647880 | 35647980 |
| chr10 | 127696500 | 127697000 | chr17 | 35694553 | 35694702 |
| chr10 | 127697149 | 127697449 | chr17 | 35715062 | 35715220 |
| chr10 | 127709229 | 127709478 | chr17 | 35731261 | 35731710 |
| chr10 | 127723842 | 127724042 | chr17 | 35786784 | 35786884 |
| chr10 | 127740038 | 127740138 | chr17 | 35797738 | 35797838 |
| chr10 | 127768847 | 127769196 | chr17 | 35828973 | 35829069 |
| chr10 | 127847796 | 127847996 | chr17 | 35870520 | 35870820 |
| chr10 | 128018907 | 128019857 | chr17 | 35907506 | 35907606 |
| chr10 | 128060664 | 128060764 | chr17 | 35907755 | 35908155 |
| chr10 | 128167176 | 128167227 | chr17 | 35986304 | 35986504 |
| chr10 | 128177720 | 128177972 | chr17 | 36008069 | 36008269 |
| chr10 | 128291530 | 128291630 | chr17 | 36059944 | 36060393 |
| chr10 | 128583286 | 128583441 | chr17 | 36135643 | 36135792 |
| chr10 | 129246533 | 129246692 | chr17 | 36170987 | 36171136 |
| chr17 | 6121382   | 6121682   | chr17 | 36171287 | 36171587 |

|       |          |          |       |          |          |
|-------|----------|----------|-------|----------|----------|
| chr17 | 6150657  | 6150857  | chr17 | 36171936 | 36172336 |
| chr17 | 6969833  | 6970233  | chr17 | 36181912 | 36182212 |
| chr17 | 7232582  | 7232782  | chr17 | 36198605 | 36198805 |
| chr17 | 7264969  | 7265318  | chr17 | 36309532 | 36309681 |
| chr17 | 7342687  | 7343687  | chr17 | 36332929 | 36333129 |
| chr17 | 7520445  | 7520545  | chr17 | 36526954 | 36527354 |
| chr17 | 7537948  | 7538356  | chr17 | 36545380 | 36545480 |
| chr17 | 7584607  | 7584756  | chr17 | 36923183 | 36923532 |
| chr17 | 7884036  | 7884185  | chr17 | 36952107 | 36952309 |
| chr17 | 8472424  | 8472933  | chr17 | 37502950 | 37503399 |
| chr17 | 8491538  | 8492091  | chr17 | 37535424 | 37535873 |
| chr17 | 8493689  | 8493889  | chr17 | 37623501 | 37624050 |
| chr17 | 8713040  | 8713291  | chr17 | 38003967 | 38004124 |
| chr17 | 8789481  | 8790030  | chr17 | 39000095 | 39000349 |
| chr17 | 8830668  | 8831068  | chr17 | 41604004 | 41604204 |
| chr17 | 10862531 | 10862631 | chr17 | 44477593 | 44478142 |
| chr17 | 11383106 | 11383406 | chr17 | 44613042 | 44613142 |
| chr17 | 13051404 | 13051953 | chr17 | 46244117 | 46244317 |
| chr17 | 13534835 | 13535584 | chr17 | 46317157 | 46317306 |
| chr17 | 13553793 | 13553993 | chr17 | 46359950 | 46360050 |
| chr17 | 13601090 | 13601290 | chr17 | 46384127 | 46384527 |
| chr17 | 13645113 | 13645462 | chr17 | 46471124 | 46471530 |
| chr17 | 13652656 | 13653305 | chr17 | 46843257 | 46843806 |
| chr17 | 13654805 | 13654905 | chr17 | 47138422 | 47139022 |
| chr17 | 13724724 | 13724873 | chr17 | 47250905 | 47251015 |
| chr17 | 13725924 | 13727024 | chr17 | 47256123 | 47256636 |
| chr17 | 14299144 | 14299344 | chr17 | 47366819 | 47366919 |
| chr17 | 14741160 | 14741360 | chr17 | 47441492 | 47441992 |
| chr17 | 14816652 | 14816852 | chr17 | 47491443 | 47491643 |
| chr17 | 15511289 | 15511489 | chr17 | 47516103 | 47516203 |
| chr17 | 15529738 | 15529938 | chr17 | 47521169 | 47521524 |
| chr17 | 15530587 | 15530787 | chr17 | 47562907 | 47563156 |
| chr17 | 18399173 | 18399273 | chr17 | 47582004 | 47582337 |
| chr17 | 18424196 | 18424745 | chr17 | 47721091 | 47721191 |
| chr17 | 22057937 | 22058186 | chr17 | 47820700 | 47821049 |
| chr17 | 22993603 | 22993864 | chr17 | 48123055 | 48123555 |
| chr17 | 24111899 | 24112090 | chr17 | 48179746 | 48180095 |
| chr17 | 24147267 | 24147567 | chr17 | 48313194 | 48313343 |
| chr17 | 24190626 | 24191026 | chr17 | 48403654 | 48404254 |
| chr17 | 24192325 | 24193074 | chr17 | 48500793 | 48501042 |
| chr17 | 24220320 | 24221169 | chr17 | 48505213 | 48505513 |
| chr17 | 24226021 | 24226121 | chr17 | 48506062 | 48506362 |
| chr17 | 24229830 | 24230779 | chr17 | 48536504 | 48536648 |

|       |          |          |       |          |          |
|-------|----------|----------|-------|----------|----------|
| chr17 | 24331891 | 24332340 | chr17 | 48595650 | 48596150 |
| chr17 | 24349037 | 24349237 | chr17 | 48735599 | 48736657 |
| chr17 | 24521326 | 24522275 | chr17 | 48956976 | 48957376 |
| chr17 | 24544095 | 24544244 | chr17 | 49113122 | 49113471 |
| chr17 | 24584905 | 24585005 | chr17 | 49157483 | 49157932 |
| chr17 | 24619249 | 24619349 | chr17 | 49223212 | 49223512 |
| chr17 | 24688222 | 24688322 | chr17 | 49744861 | 49744961 |
| chr17 | 24709549 | 24709849 | chr17 | 51004380 | 51004480 |
| chr17 | 24711198 | 24711298 | chr17 | 51322537 | 51322637 |
| chr17 | 24715968 | 24716179 | chr17 | 51993256 | 51993405 |
| chr17 | 24751405 | 24751905 | chr17 | 52646703 | 52646803 |
| chr17 | 24752805 | 24753105 | chr17 | 53274986 | 53275439 |
| chr17 | 24753554 | 24753654 | chr17 | 56590046 | 56590146 |
| chr17 | 24755177 | 24755477 | chr17 | 56631948 | 56632097 |
| chr17 | 24755826 | 24756877 | chr17 | 56652020 | 56652220 |
| chr17 | 24970972 | 24971272 | chr17 | 56654620 | 56654769 |
| chr17 | 24973145 | 24973345 | chr17 | 56669024 | 56669624 |
| chr17 | 24988874 | 24988974 | chr17 | 56717560 | 56717760 |
| chr17 | 24989723 | 24990274 | chr17 | 56726267 | 56726667 |
| chr17 | 25179926 | 25180175 | chr17 | 56850643 | 56850743 |
| chr17 | 25191498 | 25191598 | chr17 | 56884233 | 56884382 |
| chr17 | 25423459 | 25423859 | chr17 | 57071942 | 57072041 |
| chr17 | 25432970 | 25433170 | chr17 | 57202970 | 57203119 |
| chr17 | 25440509 | 25441009 | chr17 | 57206871 | 57207520 |
| chr17 | 25483207 | 25483407 | chr17 | 57266770 | 57266870 |
| chr17 | 25661665 | 25661914 | chr17 | 57424374 | 57424574 |
| chr17 | 25768871 | 25769320 | chr17 | 57424823 | 57424923 |
| chr17 | 25822081 | 25822330 | chr17 | 57529548 | 57529848 |
| chr17 | 25912422 | 25912571 | chr17 | 57593026 | 57593575 |
| chr17 | 25915673 | 25916122 | chr17 | 57605199 | 57605499 |
| chr17 | 26125486 | 26125935 | chr17 | 57606348 | 57606451 |
| chr17 | 26263413 | 26263962 | chr17 | 57624967 | 57625067 |
| chr17 | 26272789 | 26273640 | chr17 | 57654074 | 57654223 |
| chr17 | 26273989 | 26274740 | chr17 | 57655798 | 57655998 |
| chr17 | 26280829 | 26280978 | chr17 | 57656147 | 57656247 |
| chr17 | 26281329 | 26281729 | chr17 | 57681042 | 57681242 |
| chr17 | 26281978 | 26282178 | chr17 | 57872925 | 57873074 |
| chr17 | 26301466 | 26301966 | chr17 | 63895902 | 63896317 |
| chr17 | 26380851 | 26381051 | chr17 | 64740017 | 64740117 |
| chr17 | 26383566 | 26383666 | chr17 | 64741271 | 64741377 |
| chr17 | 26385218 | 26385367 | chr17 | 66439793 | 66440242 |
| chr17 | 26421955 | 26422255 | chr17 | 66678809 | 66678909 |
| chr17 | 26466341 | 26466541 | chr17 | 66871030 | 66871130 |

|       |          |          |       |          |          |
|-------|----------|----------|-------|----------|----------|
| chr17 | 26487752 | 26488401 | chr17 | 68148671 | 68148878 |
| chr17 | 26490821 | 26491621 | chr17 | 68489021 | 68489870 |
| chr17 | 26497661 | 26497761 | chr17 | 70177704 | 70177804 |
| chr17 | 26659506 | 26659806 | chr17 | 71309344 | 71309544 |
| chr17 | 26683623 | 26683872 | chr17 | 71813701 | 71813797 |
| chr17 | 26988922 | 26988973 | chr17 | 72104989 | 72105138 |
| chr17 | 27106312 | 27106461 | chr17 | 73398756 | 73398956 |
| chr17 | 27387366 | 27387515 | chr17 | 74504044 | 74504244 |
| chr17 | 27479132 | 27479881 | chr17 | 74505195 | 74505344 |
| chr17 | 27517479 | 27518433 | chr17 | 74505495 | 74505744 |
| chr17 | 27575859 | 27576408 | chr17 | 74648669 | 74649018 |
| chr17 | 27681392 | 27682144 | chr17 | 75232306 | 75232506 |
| chr17 | 27713565 | 27714315 | chr17 | 75421814 | 75421914 |
| chr17 | 27750898 | 27751849 | chr17 | 76070901 | 76071101 |
| chr17 | 28050505 | 28050605 | chr17 | 76072150 | 76072711 |
| chr17 | 28051254 | 28051554 | chr17 | 79089938 | 79090338 |
| chr17 | 28109712 | 28110612 | chr17 | 79401761 | 79402061 |
| chr17 | 28111712 | 28111812 | chr17 | 79630431 | 79630531 |
| chr17 | 28111961 | 28112361 | chr17 | 79728610 | 79728710 |
| chr17 | 28113912 | 28113961 | chr17 | 79825599 | 79825907 |
| chr17 | 28170102 | 28170202 | chr17 | 79827050 | 79827150 |
| chr17 | 28229854 | 28230254 | chr17 | 79827699 | 79828005 |
| chr17 | 28274721 | 28274921 | chr17 | 79828054 | 79828514 |
| chr17 | 28275270 | 28275521 | chr17 | 80244945 | 80245045 |
| chr17 | 28275670 | 28276370 | chr17 | 80505253 | 80505702 |
| chr17 | 28455425 | 28455630 | chr17 | 80746284 | 80746833 |
| chr17 | 28626366 | 28626415 | chr17 | 81016824 | 81017024 |
| chr17 | 28725018 | 28725267 | chr17 | 81017173 | 81017378 |
| chr17 | 28753530 | 28753979 | chr17 | 81114648 | 81115100 |
| chr17 | 28777103 | 28777203 | chr17 | 81180715 | 81180923 |
| chr17 | 28777852 | 28778803 | chr17 | 81182182 | 81182631 |
| chr17 | 28874399 | 28874499 | chr17 | 81454288 | 81454388 |
| chr17 | 28896147 | 28896347 | chr17 | 81833185 | 81833734 |
| chr17 | 28898298 | 28898398 | chr17 | 82628623 | 82628872 |
| chr17 | 28910944 | 28911244 | chr17 | 84105055 | 84105155 |
| chr17 | 28911393 | 28911693 | chr17 | 84522698 | 84523098 |
| chr17 | 29094785 | 29094985 | chr17 | 85573162 | 85573662 |
| chr17 | 29095834 | 29096234 | chr17 | 85847768 | 85847868 |
| chr17 | 29236170 | 29236319 | chr17 | 85980762 | 85981311 |
| chr17 | 29237170 | 29237270 | chr17 | 86930785 | 86930985 |
| chr17 | 29404388 | 29404537 | chr17 | 87057043 | 87057343 |
| chr17 | 29405237 | 29405288 | chr17 | 87058592 | 87059092 |
| chr17 | 29488940 | 29489289 | chr17 | 87643755 | 87644155 |

|       |          |          |       |          |          |
|-------|----------|----------|-------|----------|----------|
| chr17 | 29640152 | 29640301 | chr17 | 87644504 | 87644604 |
| chr17 | 29640352 | 29640652 | chr17 | 87915249 | 87915349 |
| chr17 | 29784668 | 29784768 | chr17 | 88562510 | 88562610 |
| chr17 | 29866216 | 29866565 | chr17 | 88688597 | 88689197 |
| chr17 | 30037189 | 30037289 | chr17 | 89420314 | 89420463 |
| chr17 | 30161208 | 30161708 | chr17 | 89559158 | 89559309 |
| chr17 | 30552213 | 30552313 | chr16 | 3802369  | 3802569  |
| chr17 | 31174004 | 31174153 | chr16 | 3828802  | 3828902  |
| chr17 | 31447105 | 31447505 | chr16 | 3956946  | 3957195  |
| chr17 | 31689062 | 31689262 | chr16 | 4088128  | 4088277  |
| chr17 | 31709902 | 31710202 | chr16 | 4162182  | 4162731  |
| chr17 | 31742429 | 31742729 | chr16 | 4297876  | 4298076  |
| chr17 | 31756941 | 31757541 | chr16 | 4299029  | 4299529  |
| chr17 | 31822336 | 31822536 | chr16 | 4643992  | 4644141  |
| chr17 | 31930930 | 31931030 | chr16 | 4724765  | 4724865  |
| chr17 | 31931779 | 31931879 | chr16 | 4769194  | 4769343  |
| chr17 | 32127324 | 32128324 | chr16 | 4874207  | 4874507  |
| chr17 | 32203969 | 32204269 | chr16 | 4970023  | 4970373  |
| chr17 | 32702220 | 32702320 | chr16 | 4971223  | 4971472  |
| chr17 | 32703369 | 32704270 | chr16 | 5048750  | 5049050  |
| chr17 | 32724967 | 32725067 | chr16 | 5098284  | 5098633  |
| chr17 | 33490183 | 33490431 | chr16 | 5288926  | 5289040  |
| chr17 | 34187159 | 34187608 | chr16 | 5969962  | 5970211  |
| chr17 | 34425348 | 34425557 | chr16 | 8510150  | 8510352  |
| chr17 | 34581462 | 34581862 | chr16 | 8722073  | 8722473  |
| chr17 | 34585660 | 34585760 | chr16 | 8722722  | 8722922  |
| chr17 | 34593727 | 34594076 | chr16 | 8823246  | 8823297  |
| chr17 | 34604905 | 34605705 | chr16 | 10079990 | 10080090 |
| chr17 | 34607656 | 34608005 | chr16 | 10256156 | 10256456 |
| chr17 | 34617362 | 34617613 | chr16 | 10400825 | 10400925 |
| chr17 | 34646025 | 34646125 | chr16 | 10498782 | 10498931 |
| chr17 | 34689977 | 34690177 | chr16 | 10629296 | 10629696 |
| chr17 | 34692377 | 34692426 | chr16 | 10631847 | 10632047 |
| chr17 | 34697291 | 34697491 | chr16 | 10878063 | 10878163 |
| chr17 | 34703270 | 34703970 | chr16 | 10921895 | 10922144 |
| chr17 | 34756565 | 34757114 | chr16 | 11174639 | 11174739 |
| chr17 | 34799710 | 34800010 | chr16 | 11340953 | 11341053 |
| chr17 | 34810272 | 34810930 | chr16 | 11995931 | 11996080 |
| chr17 | 34853313 | 34853813 | chr16 | 13444246 | 13444595 |
| chr17 | 34862332 | 34862732 | chr16 | 13758782 | 13759031 |
| chr17 | 34864332 | 34864481 | chr16 | 14027402 | 14027502 |
| chr17 | 34868399 | 34868499 | chr16 | 14404140 | 14404289 |
| chr17 | 34869548 | 34870256 | chr16 | 14446867 | 14447016 |



|       |          |          |       |          |          |
|-------|----------|----------|-------|----------|----------|
| chr17 | 35230214 | 35230563 | chr16 | 15973493 | 15973693 |
| chr17 | 35255678 | 35256027 | chr16 | 16299978 | 16300178 |
| chr17 | 35256904 | 35257253 | chr16 | 16445602 | 16445803 |
| chr17 | 35258353 | 35258753 | chr16 | 17156633 | 17156733 |
| chr17 | 35261722 | 35261771 | chr16 | 17231701 | 17232263 |
| chr17 | 35261822 | 35262271 | chr16 | 17319918 | 17320318 |
| chr17 | 35273247 | 35273347 | chr16 | 17538509 | 17538809 |
| chr17 | 35281305 | 35281605 | chr16 | 17576213 | 17576413 |
| chr17 | 35310016 | 35310179 | chr16 | 17595297 | 17595546 |
| chr17 | 35311416 | 35311516 | chr16 | 17617175 | 17617424 |
| chr17 | 35312365 | 35312465 | chr16 | 17663243 | 17663843 |
| chr17 | 35336621 | 35336721 | chr16 | 17706276 | 17706425 |
| chr17 | 35409420 | 35409820 | chr16 | 17846100 | 17846200 |
| chr17 | 35470239 | 35470788 | chr16 | 17882204 | 17882353 |
| chr17 | 35488991 | 35489191 | chr16 | 17926358 | 17926558 |
| chr17 | 35490740 | 35491040 | chr16 | 17980792 | 17980941 |
| chr17 | 35501719 | 35502119 | chr16 | 18014940 | 18015140 |
| chr17 | 35515755 | 35516155 | chr16 | 18321259 | 18321359 |
| chr17 | 35528003 | 35528103 | chr16 | 18323279 | 18323428 |
| chr17 | 35548033 | 35548138 | chr16 | 18708526 | 18708826 |
| chr17 | 35549684 | 35549833 | chr16 | 18716410 | 18716610 |
| chr17 | 35559938 | 35560038 | chr16 | 20184256 | 20184605 |
| chr17 | 35560590 | 35560790 | chr16 | 20388465 | 20388714 |
| chr17 | 35564109 | 35564209 | chr16 | 20622006 | 20622555 |
| chr17 | 35579316 | 35579816 | chr16 | 20687377 | 20688177 |
| chr17 | 35597322 | 35597671 | chr16 | 20688626 | 20688726 |
| chr17 | 35648229 | 35648329 | chr16 | 20716873 | 20716973 |
| chr17 | 35682564 | 35682864 | chr16 | 20759351 | 20759451 |
| chr17 | 35693253 | 35693402 | chr16 | 20780808 | 20781259 |
| chr17 | 35711959 | 35712159 | chr16 | 20820614 | 20820714 |
| chr17 | 35712308 | 35712408 | chr16 | 21780277 | 21780477 |
| chr17 | 35724350 | 35724999 | chr16 | 22032087 | 22032287 |
| chr17 | 35725299 | 35725399 | chr16 | 22094219 | 22094768 |
| chr17 | 35781486 | 35781586 | chr16 | 22350319 | 22350519 |
| chr17 | 35787333 | 35787433 | chr16 | 22524709 | 22524818 |
| chr17 | 35787584 | 35787733 | chr16 | 22942429 | 22942629 |
| chr17 | 35793352 | 35793401 | chr16 | 22976953 | 22977302 |
| chr17 | 35801090 | 35801290 | chr16 | 23003812 | 23004266 |
| chr17 | 35841338 | 35841387 | chr16 | 23192416 | 23192616 |
| chr17 | 35841538 | 35841787 | chr16 | 23212242 | 23212791 |
| chr17 | 35860258 | 35860358 | chr16 | 23230304 | 23230501 |
| chr17 | 35868533 | 35868882 | chr16 | 23308076 | 23308225 |
| chr17 | 35869233 | 35869533 | chr16 | 24015817 | 24016017 |

|       |          |          |       |          |          |
|-------|----------|----------|-------|----------|----------|
| chr17 | 35902335 | 35902535 | chr16 | 26190656 | 26190756 |
| chr17 | 35927999 | 35928299 | chr16 | 26666306 | 26666655 |
| chr17 | 36090213 | 36090913 | chr16 | 27074862 | 27075065 |
| chr17 | 36104752 | 36104952 | chr16 | 27473621 | 27473921 |
| chr17 | 36105301 | 36105352 | chr16 | 28529687 | 28529736 |
| chr17 | 36183361 | 36183461 | chr16 | 28530887 | 28531087 |
| chr17 | 36184312 | 36184461 | chr16 | 29288319 | 29288619 |
| chr17 | 36216977 | 36217077 | chr16 | 29621957 | 29622367 |
| chr17 | 36217826 | 36218126 | chr16 | 29659574 | 29660123 |
| chr17 | 36333780 | 36334080 | chr16 | 31396221 | 31396770 |
| chr17 | 36576782 | 36576882 | chr16 | 31744178 | 31744278 |
| chr17 | 36645114 | 36645914 | chr16 | 31958834 | 31959683 |
| chr17 | 36646363 | 36646414 | chr16 | 32028563 | 32029012 |
| chr17 | 36647763 | 36647963 | chr16 | 32083545 | 32083645 |
| chr17 | 36698338 | 36698795 | chr16 | 32179828 | 32179928 |
| chr17 | 36699238 | 36699387 | chr16 | 32180277 | 32180477 |
| chr17 | 36937341 | 36937790 | chr16 | 32326910 | 32327010 |
| chr17 | 36951958 | 36952058 | chr16 | 32327359 | 32327459 |
| chr17 | 37127766 | 37128015 | chr16 | 32500370 | 32500519 |
| chr17 | 37532973 | 37533073 | chr16 | 32568404 | 32568553 |
| chr17 | 37668400 | 37668600 | chr16 | 32724285 | 32724385 |
| chr17 | 37711809 | 37711909 | chr16 | 32877933 | 32878082 |
| chr17 | 37751700 | 37751849 | chr16 | 33142846 | 33143046 |
| chr17 | 37777417 | 37777566 | chr16 | 33143295 | 33143395 |
| chr17 | 37877288 | 37877537 | chr16 | 33265516 | 33265716 |
| chr17 | 38325668 | 38325768 | chr16 | 33908632 | 33908832 |
| chr17 | 38326117 | 38326225 | chr16 | 34730535 | 34730689 |
| chr17 | 38732809 | 38732909 | chr16 | 35571047 | 35571247 |
| chr17 | 41604653 | 41604753 | chr16 | 35849144 | 35849544 |
| chr17 | 43827097 | 43827197 | chr16 | 35849893 | 35849993 |
| chr17 | 44079825 | 44079929 | chr16 | 35951425 | 35951574 |
| chr17 | 44612393 | 44612493 | chr16 | 36909044 | 36909244 |
| chr17 | 44916551 | 44916900 | chr16 | 37092665 | 37092965 |
| chr17 | 45587487 | 45587587 | chr16 | 37734801 | 37735350 |
| chr17 | 46243368 | 46243468 | chr16 | 37948621 | 37948721 |
| chr17 | 46343311 | 46343511 | chr16 | 38428031 | 38428280 |
| chr17 | 46359494 | 46359594 | chr16 | 38514706 | 38514856 |
| chr17 | 46359843 | 46359901 | chr16 | 38533250 | 38533699 |
| chr17 | 46366033 | 46366233 | chr16 | 38602990 | 38603139 |
| chr17 | 46383078 | 46383178 | chr16 | 38793546 | 38793695 |
| chr17 | 46403410 | 46403510 | chr16 | 38793895 | 38793995 |
| chr17 | 46403859 | 46404659 | chr16 | 38823075 | 38823375 |
| chr17 | 46495080 | 46495180 | chr16 | 38982938 | 38983138 |

|       |          |          |       |          |          |
|-------|----------|----------|-------|----------|----------|
| chr17 | 46497029 | 46497129 | chr16 | 41613935 | 41614384 |
| chr17 | 46920510 | 46920759 | chr16 | 44060993 | 44061093 |
| chr17 | 46954405 | 46954654 | chr16 | 44221453 | 44221757 |
| chr17 | 47013461 | 47013810 | chr16 | 44414833 | 44415082 |
| chr17 | 47059254 | 47059358 | chr16 | 44639264 | 44639613 |
| chr17 | 47093220 | 47093369 | chr16 | 44805435 | 44805584 |
| chr17 | 47093720 | 47094720 | chr16 | 45239526 | 45239626 |
| chr17 | 47254574 | 47255074 | chr16 | 45615351 | 45615751 |
| chr17 | 47440292 | 47441143 | chr16 | 45735161 | 45735361 |
| chr17 | 47459693 | 47459793 | chr16 | 45823493 | 45823642 |
| chr17 | 47460844 | 47461044 | chr16 | 45925267 | 45925516 |
| chr17 | 47485163 | 47486315 | chr16 | 46578213 | 46578313 |
| chr17 | 47491792 | 47491992 | chr16 | 48364272 | 48364723 |
| chr17 | 47515154 | 47515354 | chr16 | 49074387 | 49074487 |
| chr17 | 47522069 | 47522169 | chr16 | 50154872 | 50155121 |
| chr17 | 47522418 | 47522618 | chr16 | 50512759 | 50513308 |
| chr17 | 47541321 | 47541626 | chr16 | 57200490 | 57200590 |
| chr17 | 47582388 | 47582849 | chr16 | 57309834 | 57309934 |
| chr17 | 47583388 | 47583637 | chr16 | 58465960 | 58466060 |
| chr17 | 47701027 | 47701442 | chr16 | 58727974 | 58728074 |
| chr17 | 48123704 | 48124155 | chr16 | 59528863 | 59529312 |
| chr17 | 48195499 | 48195599 | chr16 | 59614748 | 59615103 |
| chr17 | 48211940 | 48212040 | chr16 | 59696356 | 59696505 |
| chr17 | 48246945 | 48247345 | chr16 | 60663492 | 60663692 |
| chr17 | 48247736 | 48247936 | chr16 | 62911769 | 62912218 |
| chr17 | 48440773 | 48440873 | chr16 | 63921396 | 63921696 |
| chr17 | 48499093 | 48499642 | chr16 | 64537033 | 64537133 |
| chr17 | 48504262 | 48504562 | chr16 | 64843571 | 64844323 |
| chr17 | 48536148 | 48536248 | chr16 | 65163053 | 65163153 |
| chr17 | 48536697 | 48536797 | chr16 | 65164404 | 65164860 |
| chr17 | 48595250 | 48595499 | chr16 | 75710657 | 75710757 |
| chr17 | 48644030 | 48644530 | chr16 | 75884588 | 75884737 |
| chr17 | 48644879 | 48645079 | chr16 | 76491308 | 76491508 |
| chr17 | 48736806 | 48736906 | chr16 | 77131466 | 77131566 |
| chr17 | 48958125 | 48958425 | chr16 | 77132115 | 77132415 |
| chr17 | 48978325 | 48978625 | chr16 | 78419388 | 78419488 |
| chr17 | 48979474 | 48979574 | chr16 | 78694594 | 78694794 |
| chr17 | 49043793 | 49044442 | chr16 | 81318368 | 81318517 |
| chr17 | 49127444 | 49127944 | chr16 | 84950183 | 84950645 |
| chr17 | 49128493 | 49128893 | chr16 | 84951583 | 84952183 |
| chr17 | 49245460 | 49245911 | chr16 | 86011227 | 86011327 |
| chr17 | 49247237 | 49247386 | chr16 | 87566249 | 87566649 |
| chr17 | 49264341 | 49264533 | chr16 | 87606651 | 87607100 |

|       |          |          |       |          |          |
|-------|----------|----------|-------|----------|----------|
| chr17 | 49265284 | 49265638 | chr16 | 88940566 | 88940715 |
| chr17 | 49266899 | 49267199 | chr16 | 89007929 | 89008129 |
| chr17 | 49268148 | 49268248 | chr16 | 90071958 | 90072207 |
| chr17 | 49745210 | 49745611 | chr16 | 90073781 | 90073881 |
| chr17 | 50262560 | 50262809 | chr16 | 90840027 | 90840127 |
| chr17 | 50263323 | 50263423 | chr16 | 91180376 | 91180476 |
| chr17 | 50426218 | 50426618 | chr16 | 91181225 | 91181328 |
| chr17 | 50426767 | 50427167 | chr16 | 91483129 | 91483229 |
| chr17 | 51003629 | 51003729 | chr16 | 91517756 | 91517956 |
| chr17 | 51004833 | 51005480 | chr16 | 91658124 | 91658224 |
| chr17 | 53416132 | 53416332 | chr16 | 91759759 | 91759859 |
| chr17 | 54369521 | 54369621 | chr16 | 91799859 | 91799959 |
| chr17 | 54492265 | 54492365 | chr16 | 92042761 | 92042961 |
| chr17 | 56130445 | 56130845 | chr16 | 92433688 | 92434188 |
| chr17 | 56595760 | 56596412 | chr16 | 92471148 | 92471751 |
| chr17 | 56613820 | 56613920 | chr16 | 92808847 | 92808947 |
| chr17 | 56716811 | 56717211 | chr16 | 93716002 | 93716102 |
| chr17 | 56726118 | 56726218 | chr16 | 93995563 | 93995763 |
| chr17 | 56727718 | 56728174 | chr16 | 93996112 | 93996312 |
| chr17 | 56754999 | 56755456 | chr16 | 94622272 | 94622521 |
| chr17 | 56756199 | 56756348 | chr16 | 94662536 | 94663285 |
| chr17 | 56812058 | 56812407 | chr16 | 94860759 | 94860959 |
| chr17 | 56897438 | 56897587 | chr16 | 94946183 | 94946332 |
| chr17 | 56919463 | 56919663 | chr16 | 95331612 | 95332112 |
| chr17 | 57106793 | 57107089 | chr16 | 95590066 | 95590516 |
| chr17 | 57220629 | 57220729 | chr16 | 96040148 | 96040248 |
| chr17 | 57309865 | 57309965 | chr16 | 96466581 | 96466978 |
| chr17 | 57310314 | 57310814 | chr16 | 96483422 | 96483622 |
| chr17 | 57350890 | 57350990 | chr16 | 96483971 | 96484171 |
| chr17 | 57351841 | 57352090 | chr16 | 96530403 | 96530703 |
| chr17 | 57356937 | 57357137 | chr16 | 96539007 | 96539107 |
| chr17 | 57469358 | 57469507 | chr16 | 96539256 | 96539307 |
| chr17 | 57575437 | 57576086 | chr16 | 96619384 | 96619784 |
| chr17 | 57582068 | 57582375 | chr16 | 97508988 | 97509088 |
| chr17 | 57590463 | 57590963 | chr16 | 97509739 | 97509839 |
| chr17 | 57742788 | 57743137 | chr16 | 97899842 | 97900248 |
| chr17 | 57745137 | 57745237 | chr16 | 98052102 | 98052202 |
| chr17 | 57799367 | 57799716 | chr16 | 98210944 | 98211044 |
| chr17 | 57822102 | 57822551 | chr15 | 5096259  | 5096459  |
| chr17 | 57872225 | 57872474 | chr15 | 6339479  | 6339628  |
| chr17 | 64738917 | 64739375 | chr15 | 7351038  | 7351138  |
| chr17 | 66565139 | 66565339 | chr15 | 8061650  | 8061899  |
| chr17 | 66904029 | 66904129 | chr15 | 9004012  | 9004112  |

|       |          |          |       |          |          |
|-------|----------|----------|-------|----------|----------|
| chr17 | 67181113 | 67181362 | chr15 | 9004361  | 9004661  |
| chr17 | 67293114 | 67293717 | chr15 | 9073199  | 9073399  |
| chr17 | 68426607 | 68426907 | chr15 | 9262064  | 9262864  |
| chr17 | 68490925 | 68491025 | chr15 | 10629374 | 10629574 |
| chr17 | 69066061 | 69066210 | chr15 | 10867189 | 10867595 |
| chr17 | 69067810 | 69068010 | chr15 | 10915406 | 10915706 |
| chr17 | 69950387 | 69950487 | chr15 | 11910741 | 11910841 |
| chr17 | 70176555 | 70176655 | chr15 | 12119839 | 12119939 |
| chr17 | 71218314 | 71218863 | chr15 | 12235904 | 12236304 |
| chr17 | 71783839 | 71783939 | chr15 | 12739026 | 12739426 |
| chr17 | 71795865 | 71795965 | chr15 | 13007762 | 13008062 |
| chr17 | 71796314 | 71796414 | chr15 | 25757097 | 25757197 |
| chr17 | 71811443 | 71811792 | chr15 | 25854626 | 25854832 |
| chr17 | 71812643 | 71812843 | chr15 | 26223635 | 26223735 |
| chr17 | 72104789 | 72104938 | chr15 | 27595783 | 27595883 |
| chr17 | 72506094 | 72506343 | chr15 | 27596432 | 27596532 |
| chr17 | 72575369 | 72575518 | chr15 | 28117235 | 28117535 |
| chr17 | 73398007 | 73398107 | chr15 | 30087416 | 30087516 |
| chr17 | 73629901 | 73630101 | chr15 | 31139045 | 31139294 |
| chr17 | 73710372 | 73710579 | chr15 | 31282624 | 31282724 |
| chr17 | 73711723 | 73712572 | chr15 | 31483813 | 31483913 |
| chr17 | 74503395 | 74503495 | chr15 | 32835743 | 32836092 |
| chr17 | 74892128 | 74892477 | chr15 | 34221202 | 34221502 |
| chr17 | 75189052 | 75189152 | chr15 | 34593676 | 34593979 |
| chr17 | 75383133 | 75383333 | chr15 | 35211232 | 35211481 |
| chr17 | 76358732 | 76358981 | chr15 | 36094327 | 36094576 |
| chr17 | 79089489 | 79089646 | chr15 | 36708665 | 36709114 |
| chr17 | 79728859 | 79729059 | chr15 | 36710268 | 36710628 |
| chr17 | 79777221 | 79777670 | chr15 | 36922472 | 36922572 |
| chr17 | 80245996 | 80246096 | chr15 | 37876225 | 37876425 |
| chr17 | 80953109 | 80953409 | chr15 | 38215528 | 38215728 |
| chr17 | 81369793 | 81369993 | chr15 | 38433687 | 38433787 |
| chr17 | 81834285 | 81834785 | chr15 | 38766126 | 38766226 |
| chr17 | 84103955 | 84104204 | chr15 | 38839173 | 38839273 |
| chr17 | 84241235 | 84241435 | chr15 | 38945249 | 38945349 |
| chr17 | 84404755 | 84404855 | chr15 | 38945998 | 38946098 |
| chr17 | 84405004 | 84405204 | chr15 | 39030049 | 39030149 |
| chr17 | 84595964 | 84596164 | chr15 | 39689985 | 39690234 |
| chr17 | 85078950 | 85079050 | chr15 | 39691785 | 39692134 |
| chr17 | 85571584 | 85571733 | chr15 | 39777124 | 39777824 |
| chr17 | 85572713 | 85573013 | chr15 | 41621632 | 41621732 |
| chr17 | 85918045 | 85918445 | chr15 | 43003336 | 43003585 |
| chr17 | 86931239 | 86931448 | chr15 | 44620581 | 44620730 |

|       |          |          |       |          |          |
|-------|----------|----------|-------|----------|----------|
| chr17 | 87837741 | 87837841 | chr15 | 51710720 | 51710882 |
| chr17 | 87839114 | 87839314 | chr15 | 53178971 | 53179071 |
| chr17 | 87915698 | 87915798 | chr15 | 53179420 | 53179520 |
| chr17 | 87916949 | 87917206 | chr15 | 53735163 | 53735263 |
| chr17 | 88156134 | 88156383 | chr15 | 54404511 | 54404711 |
| chr17 | 88172839 | 88173039 | chr15 | 54923554 | 54923654 |
| chr17 | 88337114 | 88337214 | chr15 | 57570349 | 57570549 |
| chr17 | 88525161 | 88525413 | chr15 | 57571998 | 57572098 |
| chr17 | 88863437 | 88863786 | chr15 | 57866743 | 57866843 |
| chr17 | 88865054 | 88865254 | chr15 | 57968158 | 57968561 |
| chr17 | 89558358 | 89559107 | chr15 | 57974516 | 57974816 |
| chr17 | 89682530 | 89682979 | chr15 | 58048901 | 58049050 |
| chr17 | 91345281 | 91345530 | chr15 | 58157896 | 58158045 |
| chr17 | 65134272 | 65134472 | chr15 | 58706000 | 58706149 |
| chr16 | 3969805  | 3969905  | chr15 | 58721524 | 58721624 |
| chr16 | 3991780  | 3991829  | chr15 | 58914516 | 58914616 |
| chr16 | 4505308  | 4505408  | chr15 | 59148020 | 59148120 |
| chr16 | 4644992  | 4645092  | chr15 | 59207475 | 59207924 |
| chr16 | 4678184  | 4678484  | chr15 | 59482331 | 59482531 |
| chr16 | 4803531  | 4803880  | chr15 | 63894048 | 63894348 |
| chr16 | 4874856  | 4874956  | chr15 | 64648675 | 64648824 |
| chr16 | 5023982  | 5024331  | chr15 | 64755311 | 64755760 |
| chr16 | 5049199  | 5049499  | chr15 | 66664784 | 66665243 |
| chr16 | 5134314  | 5134414  | chr15 | 66803425 | 66803525 |
| chr16 | 5318616  | 5318716  | chr15 | 66948047 | 66948497 |
| chr16 | 5340970  | 5341070  | chr15 | 67010705 | 67010805 |
| chr16 | 8721120  | 8721325  | chr15 | 68091802 | 68091902 |
| chr16 | 8756818  | 8757018  | chr15 | 68092351 | 68092451 |
| chr16 | 10078890 | 10079241 | chr15 | 71559129 | 71559378 |
| chr16 | 10080841 | 10080990 | chr15 | 72889663 | 72889963 |
| chr16 | 10400076 | 10400276 | chr15 | 73672776 | 73673525 |
| chr16 | 10402076 | 10402225 | chr15 | 74542686 | 74542786 |
| chr16 | 10533458 | 10533958 | chr15 | 74543135 | 74543235 |
| chr16 | 10534307 | 10534507 | chr15 | 74552838 | 74553187 |
| chr16 | 10872993 | 10873293 | chr15 | 74633620 | 74633820 |
| chr16 | 10874763 | 10874863 | chr15 | 75400680 | 75400980 |
| chr16 | 10875312 | 10875412 | chr15 | 75512695 | 75512847 |
| chr16 | 10877263 | 10877412 | chr15 | 75537998 | 75538298 |
| chr16 | 10878712 | 10879112 | chr15 | 75582276 | 75582676 |
| chr16 | 10883280 | 10883380 | chr15 | 75742564 | 75742764 |
| chr16 | 11052958 | 11053507 | chr15 | 75774772 | 75774872 |
| chr16 | 11152868 | 11153168 | chr15 | 75847690 | 75847790 |
| chr16 | 11174988 | 11175595 | chr15 | 75914014 | 75914764 |

|       |          |          |       |          |          |
|-------|----------|----------|-------|----------|----------|
| chr16 | 11262846 | 11263046 | chr15 | 75924267 | 75924918 |
| chr16 | 11490504 | 11490604 | chr15 | 75961163 | 75961363 |
| chr16 | 11491455 | 11492304 | chr15 | 76031915 | 76032164 |
| chr16 | 13754927 | 13755036 | chr15 | 76032615 | 76033115 |
| chr16 | 13905686 | 13905786 | chr15 | 76041726 | 76042126 |
| chr16 | 13989243 | 13989343 | chr15 | 76164798 | 76165098 |
| chr16 | 14072646 | 14073495 | chr15 | 76184310 | 76184510 |
| chr16 | 14254482 | 14254582 | chr15 | 76186010 | 76186310 |
| chr16 | 14255431 | 14255631 | chr15 | 76202602 | 76202951 |
| chr16 | 14379271 | 14379420 | chr15 | 76371247 | 76371896 |
| chr16 | 14448370 | 14448519 | chr15 | 76441108 | 76441308 |
| chr16 | 15723496 | 15723596 | chr15 | 76492260 | 76493694 |
| chr16 | 15724245 | 15724345 | chr15 | 76494343 | 76494643 |
| chr16 | 16988749 | 16989398 | chr15 | 76505178 | 76505278 |
| chr16 | 17070311 | 17070460 | chr15 | 76555778 | 76555878 |
| chr16 | 17218488 | 17218688 | chr15 | 76556327 | 76556427 |
| chr16 | 17218837 | 17219037 | chr15 | 76713055 | 76713155 |
| chr16 | 17233950 | 17234601 | chr15 | 76758953 | 76759053 |
| chr16 | 17235050 | 17235350 | chr15 | 77140560 | 77140760 |
| chr16 | 17294840 | 17295340 | chr15 | 77804514 | 77804614 |
| chr16 | 17491873 | 17491973 | chr15 | 77952485 | 77953185 |
| chr16 | 17593893 | 17594142 | chr15 | 77953734 | 77954134 |
| chr16 | 17647322 | 17647871 | chr15 | 78009313 | 78009663 |
| chr16 | 17648422 | 17649071 | chr15 | 78238708 | 78238808 |
| chr16 | 17662794 | 17663094 | chr15 | 78239657 | 78239908 |
| chr16 | 17925609 | 17926109 | chr15 | 78301685 | 78301785 |
| chr16 | 17980992 | 17981192 | chr15 | 78328127 | 78328327 |
| chr16 | 17984534 | 17984734 | chr15 | 78329076 | 78329276 |
| chr16 | 18138182 | 18138835 | chr15 | 78430569 | 78430869 |
| chr16 | 18321918 | 18322228 | chr15 | 78431018 | 78431118 |
| chr16 | 18335550 | 18335650 | chr15 | 78552867 | 78552967 |
| chr16 | 18376340 | 18376440 | chr15 | 78690734 | 78691086 |
| chr16 | 18410568 | 18410668 | chr15 | 78710694 | 78711094 |
| chr16 | 18435245 | 18435345 | chr15 | 78732998 | 78733298 |
| chr16 | 18583810 | 18584010 | chr15 | 78747223 | 78747323 |
| chr16 | 18584172 | 18584464 | chr15 | 78780277 | 78780477 |
| chr16 | 18673741 | 18674593 | chr15 | 78816460 | 78816560 |
| chr16 | 18678573 | 18678773 | chr15 | 78862165 | 78862265 |
| chr16 | 18709875 | 18710375 | chr15 | 78864224 | 78864373 |
| chr16 | 18718261 | 18718410 | chr15 | 78896113 | 78896213 |
| chr16 | 18862869 | 18863069 | chr15 | 78974671 | 78974920 |
| chr16 | 20512497 | 20512597 | chr15 | 79062417 | 79062668 |
| chr16 | 20512846 | 20513046 | chr15 | 79088402 | 79088502 |

|       |          |          |       |          |          |
|-------|----------|----------|-------|----------|----------|
| chr16 | 20676024 | 20676224 | chr15 | 79180782 | 79181082 |
| chr16 | 20676673 | 20676973 | chr15 | 79236857 | 79237057 |
| chr16 | 20803266 | 20804117 | chr15 | 79275661 | 79275761 |
| chr16 | 20819258 | 20819458 | chr15 | 79276612 | 79276812 |
| chr16 | 20820763 | 20821163 | chr15 | 79349972 | 79350072 |
| chr16 | 20821914 | 20822414 | chr15 | 79366527 | 79366727 |
| chr16 | 20822863 | 20823063 | chr15 | 79439038 | 79439989 |
| chr16 | 21289957 | 21290457 | chr15 | 79524424 | 79524724 |
| chr16 | 22033538 | 22033995 | chr15 | 79576484 | 79576588 |
| chr16 | 22248458 | 22248558 | chr15 | 79607989 | 79608189 |
| chr16 | 22350768 | 22350968 | chr15 | 79638463 | 79638563 |
| chr16 | 22352219 | 22352573 | chr15 | 79766365 | 79766565 |
| chr16 | 22525909 | 22526060 | chr15 | 79848062 | 79848217 |
| chr16 | 22526309 | 22526409 | chr15 | 80088605 | 80088805 |
| chr16 | 22706682 | 22706782 | chr15 | 80097511 | 80097611 |
| chr16 | 22707145 | 22707882 | chr15 | 80097960 | 80098060 |
| chr16 | 22895769 | 22896573 | chr15 | 80504388 | 80504488 |
| chr16 | 23115129 | 23115487 | chr15 | 81069078 | 81069227 |
| chr16 | 23192167 | 23192367 | chr15 | 81299677 | 81299777 |
| chr16 | 23229747 | 23230147 | chr15 | 81418818 | 81418918 |
| chr16 | 23606037 | 23606337 | chr15 | 81419967 | 81420067 |
| chr16 | 23975516 | 23975616 | chr15 | 81497349 | 81497998 |
| chr16 | 24016276 | 24016776 | chr15 | 81608932 | 81609832 |
| chr16 | 24017041 | 24017190 | chr15 | 81636329 | 81636578 |
| chr16 | 24476612 | 24477063 | chr15 | 81759667 | 81759767 |
| chr16 | 24478012 | 24478112 | chr15 | 81770540 | 81770789 |
| chr16 | 26547615 | 26547915 | chr15 | 81793969 | 81794069 |
| chr16 | 29289168 | 29289468 | chr15 | 81849404 | 81849504 |
| chr16 | 30059049 | 30059249 | chr15 | 81849853 | 81849953 |
| chr16 | 30061001 | 30061498 | chr15 | 81961000 | 81961349 |
| chr16 | 30349057 | 30349506 | chr15 | 81980573 | 81980773 |
| chr16 | 31161854 | 31162054 | chr15 | 82186938 | 82187038 |
| chr16 | 31355751 | 31355851 | chr15 | 82213681 | 82213881 |
| chr16 | 31395121 | 31395621 | chr15 | 82241377 | 82241533 |
| chr16 | 31395970 | 31396070 | chr15 | 82627339 | 82627688 |
| chr16 | 31957883 | 31958393 | chr15 | 82628239 | 82628388 |
| chr16 | 32014478 | 32014627 | chr15 | 82856832 | 82856932 |
| chr16 | 32159547 | 32160058 | chr15 | 82857381 | 82857489 |
| chr16 | 32510986 | 32511086 | chr15 | 82932663 | 82933657 |
| chr16 | 32567804 | 32568253 | chr15 | 83086170 | 83086370 |
| chr16 | 32576405 | 32576854 | chr15 | 83184441 | 83184690 |
| chr16 | 32725634 | 32725734 | chr15 | 83343571 | 83343720 |
| chr16 | 32856956 | 32857056 | chr15 | 83345171 | 83345271 |



|       |          |          |       |          |          |
|-------|----------|----------|-------|----------|----------|
| chr16 | 32957964 | 32958064 | chr15 | 83360258 | 83360407 |
| chr16 | 33597062 | 33597862 | chr15 | 83388754 | 83388854 |
| chr16 | 33598411 | 33599011 | chr15 | 83427706 | 83427806 |
| chr16 | 33764900 | 33765100 | chr15 | 83897943 | 83898192 |
| chr16 | 33908183 | 33908383 | chr15 | 83939297 | 83939697 |
| chr16 | 33909783 | 33910083 | chr15 | 84025033 | 84025433 |
| chr16 | 35234601 | 35234901 | chr15 | 84025582 | 84025682 |
| chr16 | 35444392 | 35444492 | chr15 | 84065036 | 84065436 |
| chr16 | 35951825 | 35952674 | chr15 | 84391326 | 84391526 |
| chr16 | 35952725 | 35952874 | chr15 | 84756121 | 84756221 |
| chr16 | 36062536 | 36062736 | chr15 | 84821314 | 84821414 |
| chr16 | 36150657 | 36150806 | chr15 | 84869818 | 84870018 |
| chr16 | 36301200 | 36302502 | chr15 | 84870167 | 84870318 |
| chr16 | 36643267 | 36643819 | chr15 | 84966751 | 84966900 |
| chr16 | 36747595 | 36747744 | chr15 | 85037304 | 85037804 |
| chr16 | 36747895 | 36748744 | chr15 | 85169623 | 85169823 |
| chr16 | 36774670 | 36774770 | chr15 | 85665286 | 85665787 |
| chr16 | 36956308 | 36956608 | chr15 | 85712120 | 85712769 |
| chr16 | 37465605 | 37465805 | chr15 | 85867320 | 85867820 |
| chr16 | 37856787 | 37856887 | chr15 | 86047162 | 86047262 |
| chr16 | 37857936 | 37858236 | chr15 | 88695087 | 88695287 |
| chr16 | 37995428 | 37996077 | chr15 | 88787106 | 88787406 |
| chr16 | 37997447 | 37997596 | chr15 | 88813106 | 88813406 |
| chr16 | 38169233 | 38169333 | chr15 | 88816651 | 88816800 |
| chr16 | 38442077 | 38442477 | chr15 | 88908664 | 88908764 |
| chr16 | 38535150 | 38535299 | chr15 | 88909113 | 88909613 |
| chr16 | 43842335 | 43842735 | chr15 | 89155784 | 89155933 |
| chr16 | 43842995 | 43843091 | chr15 | 89187815 | 89188715 |
| chr16 | 44097053 | 44097702 | chr15 | 89212584 | 89212784 |
| chr16 | 44414533 | 44414782 | chr15 | 90514136 | 90514240 |
| chr16 | 45174991 | 45175240 | chr15 | 91739398 | 91739698 |
| chr16 | 45734712 | 45734812 | chr15 | 93169838 | 93170338 |
| chr16 | 48388873 | 48389124 | chr15 | 93230642 | 93230742 |
| chr16 | 48511336 | 48512036 | chr15 | 93428622 | 93429122 |
| chr16 | 49780157 | 49780362 | chr15 | 94422206 | 94422355 |
| chr16 | 49935853 | 49936053 | chr15 | 95912581 | 95912930 |
| chr16 | 56049874 | 56049974 | chr15 | 96533600 | 96533750 |
| chr16 | 57431344 | 57431644 | chr15 | 97079839 | 97079939 |
| chr16 | 57432293 | 57432595 | chr15 | 97538499 | 97538699 |
| chr16 | 57685874 | 57685974 | chr15 | 97553578 | 97553678 |
| chr16 | 58580944 | 58581044 | chr15 | 97555538 | 97555637 |
| chr16 | 58695786 | 58696035 | chr15 | 97600649 | 97600749 |
| chr16 | 58696486 | 58696635 | chr15 | 97615192 | 97615341 |

|       |          |          |       |           |           |
|-------|----------|----------|-------|-----------|-----------|
| chr16 | 59094731 | 59094883 | chr15 | 97616992  | 97617092  |
| chr16 | 59612748 | 59612948 | chr15 | 97796955  | 97797106  |
| chr16 | 59614006 | 59614297 | chr15 | 97797355  | 97797455  |
| chr16 | 60662743 | 60663243 | chr15 | 97926087  | 97926230  |
| chr16 | 62870471 | 62870671 | chr15 | 97978221  | 97978421  |
| chr16 | 62870920 | 62871420 | chr15 | 98268832  | 98269181  |
| chr16 | 65644427 | 65644527 | chr15 | 98288820  | 98288920  |
| chr16 | 65644676 | 65644776 | chr15 | 98329001  | 98329101  |
| chr16 | 67703165 | 67703265 | chr15 | 98440913  | 98441361  |
| chr16 | 78417688 | 78418440 | chr15 | 98467532  | 98467634  |
| chr16 | 78495232 | 78495332 | chr15 | 98596249  | 98596349  |
| chr16 | 84892124 | 84892273 | chr15 | 98610478  | 98610778  |
| chr16 | 84892324 | 84892681 | chr15 | 98611027  | 98611627  |
| chr16 | 85286204 | 85286760 | chr15 | 98622384  | 98622484  |
| chr16 | 86013079 | 86013528 | chr15 | 98666176  | 98666276  |
| chr16 | 87551840 | 87552196 | chr15 | 98715442  | 98715899  |
| chr16 | 87565449 | 87565700 | chr15 | 98730868  | 98731017  |
| chr16 | 87664223 | 87664423 | chr15 | 98786302  | 98787508  |
| chr16 | 87808347 | 87809599 | chr15 | 98787957  | 98788270  |
| chr16 | 87895407 | 87895556 | chr15 | 98921105  | 98921205  |
| chr16 | 88618109 | 88618258 | chr15 | 98932111  | 98932260  |
| chr16 | 88674715 | 88674815 | chr15 | 98932311  | 98932460  |
| chr16 | 88759027 | 88759176 | chr15 | 99057003  | 99057503  |
| chr16 | 88937263 | 88937363 | chr15 | 99057952  | 99058152  |
| chr16 | 88938219 | 88938314 | chr15 | 99127636  | 99127736  |
| chr16 | 89074404 | 89074555 | chr15 | 99290625  | 99290825  |
| chr16 | 90332475 | 90332575 | chr15 | 99307706  | 99307807  |
| chr16 | 90332724 | 90332824 | chr15 | 99410548  | 99410648  |
| chr16 | 90497527 | 90497627 | chr15 | 99411599  | 99411699  |
| chr16 | 90838602 | 90838951 | chr15 | 99534457  | 99535106  |
| chr16 | 90840579 | 90840876 | chr15 | 99558274  | 99558574  |
| chr16 | 91046693 | 91046893 | chr15 | 99605392  | 99605592  |
| chr16 | 91482929 | 91483078 | chr15 | 99606843  | 99607292  |
| chr16 | 91484230 | 91484679 | chr15 | 99805526  | 99805626  |
| chr16 | 91518005 | 91518056 | chr15 | 100185776 | 100186092 |
| chr16 | 91518305 | 91518405 | chr15 | 100196865 | 100197265 |
| chr16 | 91597028 | 91597128 | chr15 | 100255120 | 100255420 |
| chr16 | 91658679 | 91658979 | chr15 | 100255874 | 100255974 |
| chr16 | 91708811 | 91708911 | chr15 | 100301532 | 100301632 |
| chr16 | 91709360 | 91709460 | chr15 | 100328416 | 100328722 |
| chr16 | 91732378 | 91732575 | chr15 | 100420642 | 100421042 |
| chr16 | 91893023 | 91893323 | chr15 | 100447689 | 100447789 |
| chr16 | 92043210 | 92043310 | chr15 | 100469183 | 100469383 |

|       |          |          |       |           |           |
|-------|----------|----------|-------|-----------|-----------|
| chr16 | 92168597 | 92168751 | chr15 | 100469932 | 100470032 |
| chr16 | 92168797 | 92169197 | chr15 | 100520746 | 100521497 |
| chr16 | 92402819 | 92404068 | chr15 | 101271098 | 101271198 |
| chr16 | 92472199 | 92472948 | chr15 | 101279701 | 101279801 |
| chr16 | 92511889 | 92512138 | chr15 | 101619835 | 101620435 |
| chr16 | 93793468 | 93793917 | chr15 | 101651512 | 101651715 |
| chr16 | 94861308 | 94861408 | chr15 | 101685171 | 101685271 |
| chr16 | 95190706 | 95191355 | chr15 | 101773001 | 101773201 |
| chr16 | 95191406 | 95191955 | chr15 | 101860852 | 101861052 |
| chr16 | 96422291 | 96422598 | chr15 | 101934006 | 101934206 |
| chr16 | 96698297 | 96698997 | chr15 | 101969194 | 101969294 |
| chr16 | 97509888 | 97510139 | chr15 | 101975789 | 101975889 |
| chr16 | 97510288 | 97510388 | chr15 | 102021371 | 102021671 |
| chr16 | 97694765 | 97694865 | chr15 | 102021820 | 102021871 |
| chr16 | 97695014 | 97695414 | chr15 | 102040502 | 102040602 |
| chr16 | 97824080 | 97824729 | chr15 | 102089807 | 102090107 |
| chr15 | 3534453  | 3534602  | chr15 | 102090464 | 102090564 |
| chr15 | 3929222  | 3929322  | chr15 | 102112339 | 102112688 |
| chr15 | 3945367  | 3945867  | chr15 | 102303960 | 102304060 |
| chr15 | 3976448  | 3976748  | chr15 | 102504598 | 102504698 |
| chr15 | 5067983  | 5068078  | chr15 | 102799750 | 102800050 |
| chr15 | 5069329  | 5069878  | chr15 | 102808859 | 102809008 |
| chr15 | 5138244  | 5138344  | chr15 | 102866822 | 102866971 |
| chr15 | 5138593  | 5138793  | chr15 | 103072359 | 103072508 |
| chr15 | 5196616  | 5196816  | chr15 | 103087744 | 103087993 |
| chr15 | 5197165  | 5197265  | chr15 | 103335426 | 103335626 |
| chr15 | 7762795  | 7762995  | chr14 | 10439857  | 10439957  |
| chr15 | 10628625 | 10628825 | chr14 | 10864924  | 10865424  |
| chr15 | 10865340 | 10865940 | chr14 | 10874243  | 10874592  |
| chr15 | 11820408 | 11820508 | chr14 | 10950008  | 10950457  |
| chr15 | 12032342 | 12032642 | chr14 | 10951608  | 10951757  |
| chr15 | 12747474 | 12748074 | chr14 | 10967884  | 10968143  |
| chr15 | 13006162 | 13006262 | chr14 | 10969484  | 10969584  |
| chr15 | 25280043 | 25280443 | chr14 | 11044097  | 11044197  |
| chr15 | 25538059 | 25538159 | chr14 | 11044346  | 11044546  |
| chr15 | 25756448 | 25757048 | chr14 | 15155893  | 15155993  |
| chr15 | 25853671 | 25854171 | chr14 | 15695818  | 15696072  |
| chr15 | 25855884 | 25855984 | chr14 | 16156263  | 16156363  |
| chr15 | 26810298 | 26810498 | chr14 | 16540736  | 16540895  |
| chr15 | 27381628 | 27381828 | chr14 | 18310464  | 18310664  |
| chr15 | 27391942 | 27392943 | chr14 | 19447118  | 19447567  |
| chr15 | 28116686 | 28116786 | chr14 | 21102521  | 21102821  |
| chr15 | 31369968 | 31370168 | chr14 | 21134574  | 21134781  |

|       |          |          |       |          |          |
|-------|----------|----------|-------|----------|----------|
| chr15 | 31516636 | 31516785 | chr14 | 21756611 | 21756911 |
| chr15 | 33997701 | 33997801 | chr14 | 21757060 | 21757160 |
| chr15 | 34752201 | 34752501 | chr14 | 22600648 | 22600748 |
| chr15 | 35070655 | 35070755 | chr14 | 23031674 | 23031823 |
| chr15 | 36523383 | 36523583 | chr14 | 23411264 | 23411613 |
| chr15 | 37875476 | 37875976 | chr14 | 23515688 | 23515837 |
| chr15 | 38216177 | 38216477 | chr14 | 23643929 | 23644329 |
| chr15 | 38434336 | 38434536 | chr14 | 23779024 | 23779124 |
| chr15 | 38576574 | 38576674 | chr14 | 23901960 | 23902909 |
| chr15 | 39031698 | 39031798 | chr14 | 24565617 | 24566219 |
| chr15 | 41622281 | 41622381 | chr14 | 24598531 | 24598980 |
| chr15 | 41702238 | 41702387 | chr14 | 24681701 | 24681901 |
| chr15 | 43310251 | 43310700 | chr14 | 24697638 | 24697738 |
| chr15 | 44452223 | 44452323 | chr14 | 27296304 | 27296653 |
| chr15 | 44452772 | 44452872 | chr14 | 28391840 | 28392040 |
| chr15 | 44585758 | 44586047 | chr14 | 28500157 | 28500306 |
| chr15 | 44947345 | 44947694 | chr14 | 28648259 | 28648408 |
| chr15 | 51873324 | 51873573 | chr14 | 28708881 | 28709130 |
| chr15 | 52545671 | 52545771 | chr14 | 29339872 | 29339972 |
| chr15 | 54576954 | 54577003 | chr14 | 29340421 | 29340521 |
| chr15 | 54945318 | 54945618 | chr14 | 29385466 | 29385566 |
| chr15 | 55739825 | 55740025 | chr14 | 29475201 | 29475401 |
| chr15 | 57817436 | 57818036 | chr14 | 29769961 | 29770061 |
| chr15 | 57819285 | 57819336 | chr14 | 29903621 | 29903721 |
| chr15 | 58047701 | 58047901 | chr14 | 29904021 | 29904170 |
| chr15 | 58048050 | 58048550 | chr14 | 30308821 | 30309270 |
| chr15 | 58222450 | 58222652 | chr14 | 31302035 | 31302984 |
| chr15 | 58223801 | 58224050 | chr14 | 32518827 | 32519027 |
| chr15 | 58765336 | 58765592 | chr14 | 32775948 | 32776097 |
| chr15 | 58916369 | 58916969 | chr14 | 32805959 | 32806308 |
| chr15 | 60662701 | 60662954 | chr14 | 32806359 | 32806459 |
| chr15 | 61819029 | 61819278 | chr14 | 32807308 | 32807659 |
| chr15 | 62053396 | 62054796 | chr14 | 32807808 | 32807908 |
| chr15 | 63680120 | 63680569 | chr14 | 33683509 | 33683958 |
| chr15 | 63713502 | 63713902 | chr14 | 33799032 | 33799333 |
| chr15 | 65620491 | 65620591 | chr14 | 33816168 | 33816268 |
| chr15 | 66119379 | 66119679 | chr14 | 34050066 | 34050266 |
| chr15 | 66120028 | 66120328 | chr14 | 34133908 | 34134008 |
| chr15 | 66724259 | 66724659 | chr14 | 34628044 | 34628144 |
| chr15 | 66802576 | 66802776 | chr14 | 34826317 | 34826468 |
| chr15 | 66946947 | 66947247 | chr14 | 34938083 | 34938583 |
| chr15 | 68759310 | 68759410 | chr14 | 34938934 | 34939083 |
| chr15 | 72379683 | 72379883 | chr14 | 34998899 | 34998999 |

|       |          |          |       |          |          |
|-------|----------|----------|-------|----------|----------|
| chr15 | 72890814 | 72890963 | chr14 | 35262903 | 35263503 |
| chr15 | 72891114 | 72891269 | chr14 | 35397547 | 35397647 |
| chr15 | 72894408 | 72894757 | chr14 | 35652184 | 35652684 |
| chr15 | 73019613 | 73020370 | chr14 | 35654041 | 35654341 |
| chr15 | 73540710 | 73543059 | chr14 | 36244586 | 36245294 |
| chr15 | 73580016 | 73581516 | chr14 | 36386249 | 36386349 |
| chr15 | 74349488 | 74350188 | chr14 | 36775847 | 36776096 |
| chr15 | 74506224 | 74506324 | chr14 | 36881316 | 36881716 |
| chr15 | 74507775 | 74507924 | chr14 | 37015029 | 37015178 |
| chr15 | 74541065 | 74541414 | chr14 | 37016629 | 37016829 |
| chr15 | 74554438 | 74554638 | chr14 | 37017078 | 37017278 |
| chr15 | 74586084 | 74586184 | chr14 | 37299866 | 37299966 |
| chr15 | 74586733 | 74586933 | chr14 | 37416478 | 37417078 |
| chr15 | 74652180 | 74652830 | chr14 | 37415429 | 37415729 |
| chr15 | 74689530 | 74689679 | chr14 | 39683408 | 39683508 |
| chr15 | 75399919 | 75400019 | chr14 | 42191805 | 42192110 |
| chr15 | 75450026 | 75450575 | chr14 | 43611181 | 43611382 |
| chr15 | 75514095 | 75514248 | chr14 | 47176348 | 47176448 |
| chr15 | 75728786 | 75729186 | chr14 | 47536750 | 47537401 |
| chr15 | 75814998 | 75815098 | chr14 | 47635500 | 47635600 |
| chr15 | 75816447 | 75817447 | chr14 | 47647396 | 47647496 |
| chr15 | 75848841 | 75849490 | chr14 | 47668458 | 47668558 |
| chr15 | 75953949 | 75954849 | chr14 | 47706370 | 47706620 |
| chr15 | 75959763 | 75960112 | chr14 | 47975764 | 47976064 |
| chr15 | 75961812 | 75961912 | chr14 | 48705294 | 48706246 |
| chr15 | 76029164 | 76029264 | chr14 | 49149842 | 49150091 |
| chr15 | 76033964 | 76034164 | chr14 | 49506950 | 49507050 |
| chr15 | 76035464 | 76035964 | chr14 | 49737206 | 49737764 |
| chr15 | 76039426 | 76039875 | chr14 | 51383896 | 51383996 |
| chr15 | 76040726 | 76040926 | chr14 | 51842736 | 51842936 |
| chr15 | 76041475 | 76041575 | chr14 | 52637732 | 52637988 |
| chr15 | 76043275 | 76043675 | chr14 | 53104095 | 53104544 |
| chr15 | 76044347 | 76044647 | chr14 | 53242119 | 53242219 |
| chr15 | 76099742 | 76099942 | chr14 | 53248397 | 53248597 |
| chr15 | 76100893 | 76101093 | chr14 | 54166473 | 54166573 |
| chr15 | 76102042 | 76102143 | chr14 | 54173371 | 54174489 |
| chr15 | 76142450 | 76142599 | chr14 | 54265813 | 54265913 |
| chr15 | 76163647 | 76164048 | chr14 | 54302716 | 54302816 |
| chr15 | 76186559 | 76186659 | chr14 | 54317649 | 54317841 |
| chr15 | 76208245 | 76209095 | chr14 | 54384765 | 54385114 |
| chr15 | 76309049 | 76309802 | chr14 | 54478847 | 54479047 |
| chr15 | 76345472 | 76345572 | chr14 | 54558926 | 54559084 |
| chr15 | 76355407 | 76355607 | chr14 | 54560727 | 54561027 |

|       |          |          |       |          |          |
|-------|----------|----------|-------|----------|----------|
| chr15 | 76373247 | 76373447 | chr14 | 54561176 | 54561676 |
| chr15 | 76374096 | 76374296 | chr14 | 55204749 | 55204949 |
| chr15 | 76440759 | 76440859 | chr14 | 55875214 | 55875314 |
| chr15 | 76450506 | 76450906 | chr14 | 56538813 | 56539271 |
| chr15 | 76460032 | 76460181 | chr14 | 56700931 | 56701082 |
| chr15 | 76473116 | 76473765 | chr14 | 56701231 | 56701631 |
| chr15 | 76474621 | 76474770 | chr14 | 56860619 | 56861168 |
| chr15 | 76503427 | 76503727 | chr14 | 56889511 | 56889911 |
| chr15 | 76530465 | 76530614 | chr14 | 56901098 | 56901298 |
| chr15 | 76530665 | 76530814 | chr14 | 56901447 | 56901947 |
| chr15 | 76533695 | 76533795 | chr14 | 56925469 | 56926027 |
| chr15 | 76651905 | 76652005 | chr14 | 56969794 | 56969894 |
| chr15 | 76705089 | 76705189 | chr14 | 56970143 | 56970343 |
| chr15 | 76712600 | 76712700 | chr14 | 57177443 | 57177543 |
| chr15 | 76731545 | 76731898 | chr14 | 57209078 | 57209378 |
| chr15 | 76736503 | 76737652 | chr14 | 57210027 | 57210427 |
| chr15 | 76759504 | 76760402 | chr14 | 57251738 | 57252087 |
| chr15 | 76883973 | 76884173 | chr14 | 57277713 | 57278062 |
| chr15 | 76884922 | 76885022 | chr14 | 57278213 | 57279013 |
| chr15 | 77675853 | 77675953 | chr14 | 57401001 | 57401650 |
| chr15 | 77804265 | 77804365 | chr14 | 57505235 | 57505435 |
| chr15 | 78039856 | 78040105 | chr14 | 57874853 | 57875302 |
| chr15 | 78076887 | 78078387 | chr14 | 57919111 | 57919211 |
| chr15 | 78301834 | 78302985 | chr14 | 58029176 | 58029476 |
| chr15 | 78377450 | 78378399 | chr14 | 58044987 | 58045936 |
| chr15 | 78551418 | 78551718 | chr14 | 58068232 | 58068383 |
| chr15 | 78606799 | 78606950 | chr14 | 58167781 | 58168581 |
| chr15 | 78607099 | 78607199 | chr14 | 58457760 | 58458015 |
| chr15 | 78608450 | 78608899 | chr14 | 58648340 | 58648740 |
| chr15 | 78674651 | 78675100 | chr14 | 58854896 | 58855096 |
| chr15 | 78675951 | 78676151 | chr14 | 58855245 | 58855345 |
| chr15 | 78690234 | 78690383 | chr14 | 59061480 | 59061629 |
| chr15 | 78746478 | 78746573 | chr14 | 59096124 | 59096224 |
| chr15 | 78759030 | 78759579 | chr14 | 59341658 | 59341758 |
| chr15 | 78768737 | 78768886 | chr14 | 59408285 | 59408385 |
| chr15 | 78859916 | 78861216 | chr14 | 59408943 | 59409234 |
| chr15 | 78874636 | 78875036 | chr14 | 59807263 | 59808063 |
| chr15 | 79118752 | 79119152 | chr14 | 59948669 | 59948969 |
| chr15 | 79161573 | 79161722 | chr14 | 60029836 | 60030136 |
| chr15 | 79277161 | 79277361 | chr14 | 60109610 | 60109910 |
| chr15 | 79343900 | 79344000 | chr14 | 61484606 | 61484906 |
| chr15 | 79344249 | 79344857 | chr14 | 61908671 | 61908871 |
| chr15 | 79367276 | 79367476 | chr14 | 62548401 | 62548850 |

|       |          |          |       |          |          |
|-------|----------|----------|-------|----------|----------|
| chr15 | 79381517 | 79381717 | chr14 | 63329533 | 63330182 |
| chr15 | 79502780 | 79503132 | chr14 | 63643503 | 63643752 |
| chr15 | 79608940 | 79609189 | chr14 | 63840799 | 63840899 |
| chr15 | 79667642 | 79668091 | chr14 | 64576027 | 64576227 |
| chr15 | 79669245 | 79669445 | chr14 | 64576476 | 64576676 |
| chr15 | 79669694 | 79669894 | chr14 | 64615868 | 64616117 |
| chr15 | 79848366 | 79848520 | chr14 | 65120880 | 65120980 |
| chr15 | 79849769 | 79849969 | chr14 | 65269190 | 65269546 |
| chr15 | 79965070 | 79965419 | chr14 | 65405828 | 65406328 |
| chr15 | 79966370 | 79967219 | chr14 | 65700951 | 65701200 |
| chr15 | 80006915 | 80007015 | chr14 | 65827017 | 65827566 |
| chr15 | 80067973 | 80068173 | chr14 | 66226669 | 66227069 |
| chr15 | 80087705 | 80088354 | chr14 | 67233157 | 67233357 |
| chr15 | 80455936 | 80456843 | chr14 | 67545232 | 67545332 |
| chr15 | 80811409 | 80811509 | chr14 | 68120948 | 68121248 |
| chr15 | 81023757 | 81023857 | chr14 | 68251000 | 68251149 |
| chr15 | 81024306 | 81024406 | chr14 | 69152762 | 69153063 |
| chr15 | 81233239 | 81233388 | chr14 | 69199168 | 69199417 |
| chr15 | 81241827 | 81242133 | chr14 | 70407097 | 70407197 |
| chr15 | 81563006 | 81563455 | chr14 | 70407346 | 70407646 |
| chr15 | 81635929 | 81636278 | chr14 | 71452902 | 71453158 |
| chr15 | 81644677 | 81644777 | chr14 | 71473375 | 71473475 |
| chr15 | 81645026 | 81645526 | chr14 | 71619887 | 71619987 |
| chr15 | 81685350 | 81685550 | chr14 | 71904540 | 71904795 |
| chr15 | 81686599 | 81687005 | chr14 | 72141278 | 72141478 |
| chr15 | 82058640 | 82059140 | chr14 | 72230744 | 72230844 |
| chr15 | 82059289 | 82059489 | chr14 | 72241706 | 72242206 |
| chr15 | 82172702 | 82173002 | chr14 | 72354032 | 72354132 |
| chr15 | 82173151 | 82173202 | chr14 | 72416108 | 72416308 |
| chr15 | 82174357 | 82174757 | chr14 | 72586422 | 72586671 |
| chr15 | 82177341 | 82177741 | chr14 | 74776011 | 74776111 |
| chr15 | 82214431 | 82214530 | chr14 | 75391451 | 75391551 |
| chr15 | 82626939 | 82627088 | chr14 | 75613301 | 75613650 |
| chr15 | 82745077 | 82745177 | chr14 | 75616244 | 75616793 |
| chr15 | 82746528 | 82747177 | chr14 | 76797852 | 76797903 |
| chr15 | 83200724 | 83200820 | chr14 | 76798152 | 76798252 |
| chr15 | 83396704 | 83396953 | chr14 | 77908789 | 77909042 |
| chr15 | 83612416 | 83612516 | chr14 | 78176170 | 78176419 |
| chr15 | 83613169 | 83613469 | chr14 | 78479479 | 78479679 |
| chr15 | 84000830 | 84001030 | chr14 | 79573143 | 79573543 |
| chr15 | 84512295 | 84512744 | chr14 | 79865027 | 79865227 |
| chr15 | 84513895 | 84513995 | chr14 | 79969098 | 79969505 |
| chr15 | 84552395 | 84552595 | chr14 | 80374123 | 80374323 |

|       |          |          |       |           |           |
|-------|----------|----------|-------|-----------|-----------|
| chr15 | 84849213 | 84849513 | chr14 | 81314304  | 81314504  |
| chr15 | 84850562 | 84850762 | chr14 | 81456076  | 81456276  |
| chr15 | 84965500 | 84965809 | chr14 | 81491969  | 81492418  |
| chr15 | 85169274 | 85169474 | chr14 | 81517093  | 81517593  |
| chr15 | 85415025 | 85415325 | chr14 | 81547407  | 81547607  |
| chr15 | 85567669 | 85568069 | chr14 | 89093249  | 89093598  |
| chr15 | 85654876 | 85654976 | chr14 | 89368216  | 89368416  |
| chr15 | 85664637 | 85665237 | chr14 | 100961729 | 100961829 |
| chr15 | 85710769 | 85710969 | chr14 | 104895644 | 104895744 |
| chr15 | 86018984 | 86019184 | chr14 | 106435341 | 106435441 |
| chr15 | 87457223 | 87457323 | chr14 | 107092836 | 107092936 |
| chr15 | 88432095 | 88432195 | chr14 | 107812549 | 107812749 |
| chr15 | 88652246 | 88652346 | chr14 | 108021318 | 108021418 |
| chr15 | 88652995 | 88654295 | chr14 | 113591521 | 113592148 |
| chr15 | 88787855 | 88789355 | chr14 | 119800456 | 119800556 |
| chr15 | 88892097 | 88892497 | chr14 | 120369716 | 120369816 |
| chr15 | 88893546 | 88893646 | chr14 | 120449656 | 120449815 |
| chr15 | 88907164 | 88907714 | chr14 | 120588233 | 120588382 |
| chr15 | 88973804 | 88974153 | chr14 | 122141024 | 122141324 |
| chr15 | 89029635 | 89030038 | chr14 | 123168217 | 123168566 |
| chr15 | 89154166 | 89154266 | chr14 | 123697437 | 123697737 |
| chr15 | 89154584 | 89154733 | chr14 | 124113979 | 124114079 |
| chr15 | 89167585 | 89167734 | chr14 | 124114228 | 124114528 |
| chr15 | 89167785 | 89167934 | chr14 | 124197414 | 124197663 |
| chr15 | 89188766 | 89188915 | chr14 | 124576141 | 124576390 |
| chr15 | 89262971 | 89263171 | chr14 | 124646574 | 124646774 |
| chr15 | 89287326 | 89287426 | chr19 | 3282695   | 3282895   |
| chr15 | 89321249 | 89321898 | chr19 | 3413957   | 3414157   |
| chr15 | 89331251 | 89331451 | chr19 | 3415011   | 3415111   |
| chr15 | 89425060 | 89425609 | chr19 | 3575972   | 3576172   |
| chr15 | 90057644 | 90057793 | chr19 | 3914509   | 3914609   |
| chr15 | 90512283 | 90512383 | chr19 | 3985709   | 3985912   |
| chr15 | 90882955 | 90883055 | chr19 | 3985960   | 3986660   |
| chr15 | 91406405 | 91406505 | chr19 | 4014428   | 4014577   |
| chr15 | 93107266 | 93107466 | chr19 | 4096950   | 4097050   |
| chr15 | 94376250 | 94376750 | chr19 | 4097699   | 4097799   |
| chr15 | 94460266 | 94460415 | chr19 | 4100021   | 4100221   |
| chr15 | 95360434 | 95360534 | chr19 | 4100870   | 4101070   |
| chr15 | 95914181 | 95914337 | chr19 | 4139180   | 4140084   |
| chr15 | 96294001 | 96294101 | chr19 | 4148559   | 4149108   |
| chr15 | 96457481 | 96458032 | chr19 | 4163245   | 4163494   |
| chr15 | 96532614 | 96533049 | chr19 | 4191022   | 4191323   |
| chr15 | 96888833 | 96888933 | chr19 | 4192075   | 4192175   |



|       |          |          |       |         |         |
|-------|----------|----------|-------|---------|---------|
| chr15 | 97078883 | 97079083 | chr19 | 4212391 | 4212540 |
| chr15 | 97600000 | 97600400 | chr19 | 4214091 | 4214391 |
| chr15 | 97664348 | 97664548 | chr19 | 4305655 | 4305766 |
| chr15 | 97665199 | 97666248 | chr19 | 4398363 | 4398866 |
| chr15 | 97666299 | 97666448 | chr19 | 4439424 | 4439773 |
| chr15 | 97796706 | 97796806 | chr19 | 4477092 | 4477292 |
| chr15 | 97838022 | 97838122 | chr19 | 4625217 | 4625317 |
| chr15 | 97925638 | 97925838 | chr19 | 4625775 | 4626166 |
| chr15 | 97927585 | 97927685 | chr19 | 4811683 | 4811983 |
| chr15 | 98090056 | 98090789 | chr19 | 4855377 | 4855428 |
| chr15 | 98128411 | 98128711 | chr19 | 4878603 | 4878703 |
| chr15 | 98128860 | 98129060 | chr19 | 4906812 | 4907312 |
| chr15 | 98174016 | 98174616 | chr19 | 4942550 | 4942650 |
| chr15 | 98212636 | 98212836 | chr19 | 4989771 | 4989920 |
| chr15 | 98316435 | 98316584 | chr19 | 5039852 | 5040003 |
| chr15 | 98509938 | 98510738 | chr19 | 5085626 | 5085726 |
| chr15 | 98560526 | 98560675 | chr19 | 5106596 | 5106996 |
| chr15 | 98595300 | 98595500 | chr19 | 5108845 | 5108945 |
| chr15 | 98666325 | 98667176 | chr19 | 5118393 | 5118593 |
| chr15 | 98667525 | 98667628 | chr19 | 5295048 | 5295297 |
| chr15 | 98787765 | 98787808 | chr19 | 5297948 | 5298148 |
| chr15 | 98886134 | 98886483 | chr19 | 5336040 | 5336189 |
| chr15 | 98922256 | 98922508 | chr19 | 5349074 | 5349523 |
| chr15 | 98932511 | 98932660 | chr19 | 5350875 | 5350975 |
| chr15 | 98959921 | 98960021 | chr19 | 5366312 | 5366412 |
| chr15 | 99084461 | 99084611 | chr19 | 5388652 | 5388752 |
| chr15 | 99128285 | 99128686 | chr19 | 5425305 | 5425405 |
| chr15 | 99203743 | 99204094 | chr19 | 5460849 | 5461098 |
| chr15 | 99204543 | 99204752 | chr19 | 5474680 | 5474780 |
| chr15 | 99225170 | 99225519 | chr19 | 5560924 | 5561324 |
| chr15 | 99307057 | 99307657 | chr19 | 5609778 | 5610029 |
| chr15 | 99360994 | 99361094 | chr19 | 5637095 | 5637395 |
| chr15 | 99362645 | 99362794 | chr19 | 5663120 | 5663469 |
| chr15 | 99409899 | 99409999 | chr19 | 5703975 | 5704124 |
| chr15 | 99410248 | 99410399 | chr19 | 5731482 | 5731682 |
| chr15 | 99422407 | 99422656 | chr19 | 5731733 | 5731982 |
| chr15 | 99423307 | 99423407 | chr19 | 5740426 | 5741026 |
| chr15 | 99503245 | 99503345 | chr19 | 5770901 | 5771001 |
| chr15 | 99503794 | 99503894 | chr19 | 5878208 | 5878308 |
| chr15 | 99533157 | 99534206 | chr19 | 5894056 | 5894156 |
| chr15 | 99535406 | 99535606 | chr19 | 5924674 | 5924823 |
| chr15 | 99550120 | 99550620 | chr19 | 5986392 | 5986495 |
| chr15 | 99654127 | 99654376 | chr19 | 6016500 | 6016800 |

|       |           |           |       |         |         |
|-------|-----------|-----------|-------|---------|---------|
| chr15 | 100137345 | 100137645 | chr19 | 6061448 | 6061597 |
| chr15 | 100196412 | 100196712 | chr19 | 6083996 | 6084096 |
| chr15 | 100301881 | 100302181 | chr19 | 6085045 | 6085245 |
| chr15 | 100384924 | 100385024 | chr19 | 6105497 | 6105697 |
| chr15 | 100561804 | 100562104 | chr19 | 6118235 | 6118535 |
| chr15 | 100563669 | 100563920 | chr19 | 6141186 | 6141386 |
| chr15 | 100594530 | 100594630 | chr19 | 6241441 | 6241641 |
| chr15 | 100650852 | 100651406 | chr19 | 6242090 | 6242190 |
| chr15 | 100768458 | 100768790 | chr19 | 6276495 | 6276595 |
| chr15 | 100948327 | 100948976 | chr19 | 6335053 | 6335202 |
| chr15 | 100959349 | 100959549 | chr19 | 6340498 | 6341049 |
| chr15 | 100960398 | 100960598 | chr19 | 6363587 | 6363787 |
| chr15 | 100961149 | 100961798 | chr19 | 6400761 | 6400910 |
| chr15 | 101007303 | 101007403 | chr19 | 7003822 | 7004171 |
| chr15 | 101056736 | 101056936 | chr19 | 7007016 | 7007716 |
| chr15 | 101098289 | 101098789 | chr19 | 7009165 | 7009265 |
| chr15 | 101099553 | 101099653 | chr19 | 7015951 | 7016200 |
| chr15 | 101116928 | 101117077 | chr19 | 7022539 | 7023190 |
| chr15 | 101124039 | 101124388 | chr19 | 7062066 | 7062215 |
| chr15 | 101243730 | 101244830 | chr19 | 7074508 | 7074657 |
| chr15 | 101279850 | 101279950 | chr19 | 7076768 | 7077068 |
| chr15 | 101306605 | 101306705 | chr19 | 7077217 | 7077668 |
| chr15 | 101367204 | 101367553 | chr19 | 7138645 | 7138945 |
| chr15 | 101383944 | 101384044 | chr19 | 7165972 | 7166272 |
| chr15 | 101384995 | 101385245 | chr19 | 7287869 | 7288169 |
| chr15 | 101395027 | 101395127 | chr19 | 7464911 | 7465111 |
| chr15 | 101397527 | 101397676 | chr19 | 7575912 | 7576037 |
| chr15 | 101512800 | 101513000 | chr19 | 7694703 | 7694852 |
| chr15 | 101526633 | 101527395 | chr19 | 8700275 | 8700424 |
| chr15 | 101527833 | 101528382 | chr19 | 8795309 | 8795558 |
| chr15 | 101545219 | 101545319 | chr19 | 8817892 | 8818041 |
| chr15 | 101545668 | 101546368 | chr19 | 8823703 | 8823804 |
| chr15 | 101575625 | 101575874 | chr19 | 8838837 | 8839486 |
| chr15 | 101577525 | 101577774 | chr19 | 8852930 | 8853030 |
| chr15 | 101635209 | 101635319 | chr19 | 8856277 | 8856477 |
| chr15 | 101683880 | 101684222 | chr19 | 8856726 | 8856826 |
| chr15 | 101701946 | 101702295 | chr19 | 8884494 | 8884594 |
| chr15 | 101757688 | 101757888 | chr19 | 8884743 | 8884843 |
| chr15 | 101786552 | 101786652 | chr19 | 8922286 | 8922386 |
| chr15 | 101787001 | 101787301 | chr19 | 8933068 | 8933177 |
| chr15 | 101838111 | 101838260 | chr19 | 8953247 | 8953347 |
| chr15 | 101861401 | 101861501 | chr19 | 8953796 | 8953896 |
| chr15 | 101981702 | 101981802 | chr19 | 8974939 | 8975239 |

|       |           |           |       |          |          |
|-------|-----------|-----------|-------|----------|----------|
| chr15 | 101982151 | 101982752 | chr19 | 8980394  | 8980494  |
| chr15 | 102022120 | 102022320 | chr19 | 9023505  | 9024254  |
| chr15 | 102102690 | 102103090 | chr19 | 9069818  | 9070218  |
| chr15 | 102103690 | 102103839 | chr19 | 10064737 | 10064837 |
| chr15 | 102162637 | 102163386 | chr19 | 10079898 | 10079998 |
| chr15 | 102277887 | 102278536 | chr19 | 10098162 | 10098611 |
| chr15 | 102291759 | 102291908 | chr19 | 10183238 | 10183438 |
| chr15 | 102349140 | 102349889 | chr19 | 10183787 | 10184087 |
| chr15 | 102351176 | 102351625 | chr19 | 10353772 | 10353872 |
| chr15 | 102505047 | 102505447 | chr19 | 10951363 | 10951663 |
| chr15 | 102753758 | 102753967 | chr19 | 10953114 | 10953214 |
| chr15 | 102845235 | 102845484 | chr19 | 10953463 | 10953663 |
| chr15 | 103172412 | 103172561 | chr19 | 11002167 | 11002267 |
| chr15 | 103172812 | 103173061 | chr19 | 11018795 | 11019344 |
| chr15 | 103174612 | 103174861 | chr19 | 11367408 | 11367661 |
| chr15 | 103370389 | 103370738 | chr19 | 12118426 | 12118524 |
| chr14 | 9976848   | 9976948   | chr19 | 12655359 | 12655908 |
| chr14 | 10865573  | 10866773  | chr19 | 12877583 | 12877683 |
| chr14 | 10872343  | 10872592  | chr19 | 12877932 | 12878032 |
| chr14 | 14424872  | 14424972  | chr19 | 12965044 | 12965202 |
| chr14 | 15218041  | 15218238  | chr19 | 16066999 | 16067099 |
| chr14 | 15694667  | 15694867  | chr19 | 16517924 | 16518073 |
| chr14 | 16156812  | 16157012  | chr19 | 16862937 | 16863037 |
| chr14 | 16884054  | 16884154  | chr19 | 16956491 | 16956591 |
| chr14 | 17217455  | 17217555  | chr19 | 17476051 | 17476251 |
| chr14 | 17218504  | 17218704  | chr19 | 18713725 | 18714125 |
| chr14 | 17574285  | 17574485  | chr19 | 18793738 | 18793938 |
| chr14 | 20842614  | 20843014  | chr19 | 18831443 | 18831643 |
| chr14 | 22673416  | 22673565  | chr19 | 19082874 | 19083223 |
| chr14 | 22675316  | 22675465  | chr19 | 21353560 | 21353760 |
| chr14 | 23243347  | 23243696  | chr19 | 21554193 | 21554493 |
| chr14 | 23515988  | 23516637  | chr19 | 22219849 | 22220649 |
| chr14 | 23543108  | 23543459  | chr19 | 22221149 | 22221449 |
| chr14 | 23543608  | 23544308  | chr19 | 23530054 | 23530354 |
| chr14 | 23580268  | 23580768  | chr19 | 23840158 | 23840258 |
| chr14 | 24348686  | 24348886  | chr19 | 24255671 | 24255871 |
| chr14 | 24563968  | 24564668  | chr19 | 24558857 | 24559257 |
| chr14 | 24593620  | 24593720  | chr19 | 24755053 | 24755587 |
| chr14 | 24680252  | 24680852  | chr19 | 24943774 | 24943874 |
| chr14 | 24698087  | 24698787  | chr19 | 24945025 | 24945583 |
| chr14 | 26810523  | 26810623  | chr19 | 25318184 | 25318684 |
| chr14 | 28263428  | 28263528  | chr19 | 25319433 | 25319533 |
| chr14 | 28390991  | 28391291  | chr19 | 25692773 | 25692873 |

|       |          |          |       |          |          |
|-------|----------|----------|-------|----------|----------|
| chr14 | 28497957 | 28498206 | chr19 | 26686795 | 26687295 |
| chr14 | 28499657 | 28499806 | chr19 | 28094672 | 28094772 |
| chr14 | 28708181 | 28708630 | chr19 | 28917895 | 28918195 |
| chr14 | 29701352 | 29701654 | chr19 | 29046823 | 29047023 |
| chr14 | 30421702 | 30421902 | chr19 | 29184606 | 29184706 |
| chr14 | 30422151 | 30422251 | chr19 | 29334237 | 29334337 |
| chr14 | 32520376 | 32520576 | chr19 | 29335086 | 29335186 |
| chr14 | 32774048 | 32774797 | chr19 | 29408701 | 29408950 |
| chr14 | 32817765 | 32817916 | chr19 | 30112785 | 30112885 |
| chr14 | 32819665 | 32819814 | chr19 | 30258250 | 30258350 |
| chr14 | 33415914 | 33416063 | chr19 | 30633479 | 30633628 |
| chr14 | 33676419 | 33676519 | chr19 | 31847516 | 31847616 |
| chr14 | 33798083 | 33798583 | chr19 | 31847965 | 31848073 |
| chr14 | 33965352 | 33965601 | chr19 | 32185772 | 32186172 |
| chr14 | 33967452 | 33967802 | chr19 | 32187730 | 32187879 |
| chr14 | 34005148 | 34005243 | chr19 | 32568851 | 32568951 |
| chr14 | 34048815 | 34049115 | chr19 | 32795230 | 32795630 |
| chr14 | 34134357 | 34134457 | chr19 | 34557618 | 34557767 |
| chr14 | 34232641 | 34232841 | chr19 | 34830194 | 34830946 |
| chr14 | 34824668 | 34824768 | chr19 | 36204230 | 36204529 |
| chr14 | 34961171 | 34961430 | chr19 | 36463202 | 36463355 |
| chr14 | 34999648 | 34999748 | chr19 | 36821589 | 36821689 |
| chr14 | 35000599 | 35000799 | chr19 | 37290917 | 37291017 |
| chr14 | 35396047 | 35396698 | chr19 | 37459994 | 37460094 |
| chr14 | 36720284 | 36720484 | chr19 | 37460543 | 37460643 |
| chr14 | 36720833 | 36720933 | chr19 | 37517525 | 37518276 |
| chr14 | 36737321 | 36738121 | chr19 | 37781489 | 37781689 |
| chr14 | 36750137 | 36750437 | chr19 | 37781838 | 37782038 |
| chr14 | 36775147 | 36775596 | chr19 | 38138773 | 38138873 |
| chr14 | 36836760 | 36837013 | chr19 | 38180963 | 38181063 |
| chr14 | 36850561 | 36850710 | chr19 | 38181212 | 38181312 |
| chr14 | 36882567 | 36883316 | chr19 | 38215733 | 38215835 |
| chr14 | 37108182 | 37108282 | chr19 | 38607532 | 38608032 |
| chr14 | 37170411 | 37170560 | chr19 | 40367151 | 40367451 |
| chr14 | 37170911 | 37171411 | chr19 | 40609105 | 40609955 |
| chr14 | 37171560 | 37171711 | chr19 | 40707484 | 40707633 |
| chr14 | 37172467 | 37172660 | chr19 | 40794003 | 40794116 |
| chr14 | 37417429 | 37417878 | chr19 | 40926147 | 40926747 |
| chr14 | 37389601 | 37389701 | chr19 | 41302204 | 41302353 |
| chr14 | 39684559 | 39684710 | chr19 | 41359822 | 41359922 |
| chr14 | 39849561 | 39849710 | chr19 | 41839025 | 41839674 |
| chr14 | 46378675 | 46378765 | chr19 | 41897603 | 41897858 |
| chr14 | 47176497 | 47176597 | chr19 | 41925621 | 41925721 |

|       |          |          |       |          |          |
|-------|----------|----------|-------|----------|----------|
| chr14 | 47305963 | 47306112 | chr19 | 41943950 | 41944050 |
| chr14 | 47536601 | 47536701 | chr19 | 42007328 | 42007428 |
| chr14 | 47537550 | 47537850 | chr19 | 42028381 | 42028830 |
| chr14 | 47847887 | 47847987 | chr19 | 42076331 | 42076631 |
| chr14 | 49199165 | 49199365 | chr19 | 42141068 | 42141368 |
| chr14 | 49594073 | 49594173 | chr19 | 42141519 | 42141668 |
| chr14 | 49594522 | 49594622 | chr19 | 42185603 | 42186203 |
| chr14 | 49885562 | 49885813 | chr19 | 42224811 | 42225113 |
| chr14 | 50437938 | 50438038 | chr19 | 42242203 | 42242303 |
| chr14 | 50514114 | 50514314 | chr19 | 42297951 | 42298051 |
| chr14 | 50514963 | 50516563 | chr19 | 42351452 | 42351552 |
| chr14 | 51200668 | 51201217 | chr19 | 42528175 | 42528975 |
| chr14 | 51843385 | 51843585 | chr19 | 42708917 | 42709466 |
| chr14 | 53123344 | 53123693 | chr19 | 42875714 | 42875865 |
| chr14 | 53242468 | 53242568 | chr19 | 43620178 | 43620278 |
| chr14 | 53389239 | 53389790 | chr19 | 43705993 | 43706493 |
| chr14 | 53390246 | 53390539 | chr19 | 43706842 | 43707793 |
| chr14 | 53430863 | 53431163 | chr19 | 43708342 | 43708442 |
| chr14 | 53431512 | 53432412 | chr19 | 43770050 | 43770550 |
| chr14 | 53479871 | 53480320 | chr19 | 43771299 | 43771399 |
| chr14 | 53573011 | 53573163 | chr19 | 43785742 | 43785842 |
| chr14 | 53677154 | 53677503 | chr19 | 43846664 | 43846964 |
| chr14 | 54172922 | 54173222 | chr19 | 43848487 | 43848636 |
| chr14 | 54195083 | 54195183 | chr19 | 44164994 | 44165094 |
| chr14 | 54195334 | 54195883 | chr19 | 44297856 | 44298005 |
| chr14 | 54204012 | 54204212 | chr19 | 44504422 | 44504571 |
| chr14 | 54205063 | 54205163 | chr19 | 44589290 | 44589341 |
| chr14 | 54297847 | 54298347 | chr19 | 44650784 | 44650984 |
| chr14 | 54302965 | 54303265 | chr19 | 44651541 | 44652041 |
| chr14 | 54479938 | 54480387 | chr19 | 44851811 | 44852462 |
| chr14 | 54561076 | 54561127 | chr19 | 45085361 | 45085461 |
| chr14 | 54585907 | 54586056 | chr19 | 45116158 | 45116358 |
| chr14 | 54631176 | 54631476 | chr19 | 45125384 | 45126238 |
| chr14 | 55304621 | 55305070 | chr19 | 45127333 | 45127433 |
| chr14 | 55579018 | 55579167 | chr19 | 45143342 | 45143691 |
| chr14 | 56645395 | 56645744 | chr19 | 45246601 | 45246701 |
| chr14 | 56710611 | 56710860 | chr19 | 45459358 | 45459558 |
| chr14 | 56714221 | 56714770 | chr19 | 45654383 | 45654832 |
| chr14 | 56837439 | 56837639 | chr19 | 45756211 | 45756611 |
| chr14 | 56838188 | 56838288 | chr19 | 45839942 | 45840091 |
| chr14 | 56890060 | 56890164 | chr19 | 45845381 | 45845485 |
| chr14 | 56924420 | 56924720 | chr19 | 45878460 | 45878560 |
| chr14 | 56995786 | 56995986 | chr19 | 45879109 | 45879309 |

|       |          |          |       |          |          |
|-------|----------|----------|-------|----------|----------|
| chr14 | 57065750 | 57065899 | chr19 | 45912121 | 45912872 |
| chr14 | 57196142 | 57196342 | chr19 | 46099076 | 46099176 |
| chr14 | 57196591 | 57197391 | chr19 | 46171532 | 46171981 |
| chr14 | 57218733 | 57218982 | chr19 | 46244243 | 46244343 |
| chr14 | 57390821 | 57391674 | chr19 | 46248326 | 46248426 |
| chr14 | 57399850 | 57400550 | chr19 | 46422377 | 46422726 |
| chr14 | 57400801 | 57400951 | chr19 | 46435593 | 46435742 |
| chr14 | 57761860 | 57762309 | chr19 | 46595967 | 46596167 |
| chr14 | 57774293 | 57774393 | chr19 | 46596328 | 46596839 |
| chr14 | 57793323 | 57793523 | chr19 | 46768143 | 46768343 |
| chr14 | 57794272 | 57795372 | chr19 | 46768492 | 46768594 |
| chr14 | 57807955 | 57808204 | chr19 | 46803451 | 46803600 |
| chr14 | 57859452 | 57860057 | chr19 | 46858114 | 46858314 |
| chr14 | 57868418 | 57868767 | chr19 | 47058026 | 47058326 |
| chr14 | 57875353 | 57875502 | chr19 | 47109971 | 47110171 |
| chr14 | 57901505 | 57901705 | chr19 | 47146263 | 47146463 |
| chr14 | 57920173 | 57920323 | chr19 | 47185934 | 47186383 |
| chr14 | 57933345 | 57933645 | chr19 | 47274288 | 47274388 |
| chr14 | 57933894 | 57934199 | chr19 | 47560129 | 47560229 |
| chr14 | 58005440 | 58005589 | chr19 | 47633749 | 47633849 |
| chr14 | 58005640 | 58006089 | chr19 | 47675087 | 47675187 |
| chr14 | 58071850 | 58071999 | chr19 | 48301693 | 48301993 |
| chr14 | 58108575 | 58109024 | chr19 | 53426288 | 53426388 |
| chr14 | 59170508 | 59170608 | chr19 | 53695894 | 53695994 |
| chr14 | 59417390 | 59417490 | chr19 | 54040322 | 54040422 |
| chr14 | 59948020 | 59948620 | chr19 | 54140156 | 54140256 |
| chr14 | 60081717 | 60081817 | chr19 | 55939721 | 55941077 |
| chr14 | 60173875 | 60173975 | chr19 | 55941121 | 55941491 |
| chr14 | 60283475 | 60283678 | chr19 | 56383516 | 56383816 |
| chr14 | 61485055 | 61485256 | chr19 | 56485265 | 56485465 |
| chr14 | 62661509 | 62661809 | chr19 | 56643997 | 56644197 |
| chr14 | 63049697 | 63049897 | chr19 | 56910713 | 56911265 |
| chr14 | 63050446 | 63050546 | chr19 | 56934140 | 56934240 |
| chr14 | 63051397 | 63051849 | chr19 | 56970294 | 56970494 |
| chr14 | 63592216 | 63592665 | chr19 | 57105756 | 57105860 |
| chr14 | 63723687 | 63723787 | chr19 | 58550108 | 58550308 |
| chr14 | 63882506 | 63883645 | chr19 | 58550857 | 58551357 |
| chr14 | 64739553 | 64740353 | chr19 | 58765594 | 58765694 |
| chr14 | 65044376 | 65045325 | chr19 | 58956175 | 58956475 |
| chr14 | 65293334 | 65293634 | chr19 | 59037155 | 59037555 |
| chr14 | 65295034 | 65295183 | chr19 | 59039328 | 59039528 |
| chr14 | 65461460 | 65461609 | chr19 | 59265259 | 59265911 |
| chr14 | 65477005 | 65477154 | chr19 | 59267163 | 59267412 |

|       |          |          |       |          |          |
|-------|----------|----------|-------|----------|----------|
| chr14 | 65528924 | 65529024 | chr19 | 59267563 | 59267712 |
| chr14 | 65529173 | 65529273 | chr19 | 59313577 | 59314377 |
| chr14 | 65530124 | 65530273 | chr19 | 59315135 | 59315626 |
| chr14 | 65530424 | 65530573 | chr19 | 59356805 | 59357105 |
| chr14 | 65719018 | 65719718 | chr19 | 59554450 | 59554550 |
| chr14 | 65792805 | 65793006 | chr19 | 60323689 | 60323789 |
| chr14 | 67232908 | 67233108 | chr19 | 60565796 | 60565896 |
| chr14 | 67363839 | 67363939 | chr19 | 60677972 | 60678172 |
| chr14 | 67658657 | 67658757 | chr19 | 60987967 | 60988067 |
| chr14 | 67709530 | 67709836 | chr19 | 61326170 | 61326481 |
| chr14 | 68292774 | 68293023 | chr18 | 3508104  | 3508404  |
| chr14 | 68369873 | 68370323 | chr18 | 4352792  | 4352992  |
| chr14 | 68422523 | 68422972 | chr18 | 6490354  | 6490554  |
| chr14 | 68565476 | 68565625 | chr18 | 6491003  | 6491103  |
| chr14 | 68626138 | 68626994 | chr18 | 6515585  | 6515847  |
| chr14 | 69152213 | 69152313 | chr18 | 7004254  | 7004454  |
| chr14 | 69292237 | 69292437 | chr18 | 9213179  | 9213379  |
| chr14 | 69991627 | 69992076 | chr18 | 9450197  | 9450397  |
| chr14 | 69998268 | 69998368 | chr18 | 9707674  | 9707874  |
| chr14 | 71473824 | 71473924 | chr18 | 9708028  | 9708123  |
| chr14 | 71567340 | 71567889 | chr18 | 9957978  | 9958627  |
| chr14 | 71672109 | 71672458 | chr18 | 10182164 | 10182364 |
| chr14 | 71797222 | 71797422 | chr18 | 10617996 | 10618245 |
| chr14 | 71869604 | 71869853 | chr18 | 13145900 | 13146100 |
| chr14 | 71902940 | 71903589 | chr18 | 14146212 | 14146312 |
| chr14 | 72139978 | 72140127 | chr18 | 15577153 | 15577909 |
| chr14 | 72232493 | 72232893 | chr18 | 16983395 | 16983495 |
| chr14 | 72242355 | 72242455 | chr18 | 20920345 | 20920445 |
| chr14 | 72243906 | 72244055 | chr18 | 21069570 | 21069770 |
| chr14 | 72272671 | 72272820 | chr18 | 21070419 | 21070519 |
| chr14 | 72508330 | 72508430 | chr18 | 23213548 | 23213797 |
| chr14 | 72594603 | 72594803 | chr18 | 24644561 | 24645010 |
| chr14 | 72595552 | 72595852 | chr18 | 24775518 | 24775616 |
| chr14 | 72609993 | 72610142 | chr18 | 24778113 | 24778313 |
| chr14 | 72616989 | 72617738 | chr18 | 24883036 | 24883336 |
| chr14 | 72618489 | 72618789 | chr18 | 25342711 | 25342811 |
| chr14 | 72640380 | 72641429 | chr18 | 30449193 | 30449644 |
| chr14 | 72642180 | 72642280 | chr18 | 32107408 | 32107657 |
| chr14 | 72706751 | 72706851 | chr18 | 32107708 | 32107857 |
| chr14 | 75114830 | 75115079 | chr18 | 32243861 | 32244061 |
| chr14 | 75206003 | 75207056 | chr18 | 32312486 | 32312586 |
| chr14 | 76704298 | 76704458 | chr18 | 32339201 | 32339401 |
| chr14 | 76797952 | 76798003 | chr18 | 32553454 | 32554003 |

|       |           |           |       |          |          |
|-------|-----------|-----------|-------|----------|----------|
| chr14 | 77200983  | 77201232  | chr18 | 33408013 | 33408462 |
| chr14 | 77305746  | 77306001  | chr18 | 33658687 | 33658787 |
| chr14 | 77349731  | 77349931  | chr18 | 34201862 | 34201962 |
| chr14 | 77851996  | 77852196  | chr18 | 34202913 | 34203113 |
| chr14 | 77852345  | 77852445  | chr18 | 34525312 | 34525512 |
| chr14 | 79101730  | 79101830  | chr18 | 34568187 | 34568387 |
| chr14 | 79102279  | 79102379  | chr18 | 34701381 | 34701481 |
| chr14 | 79865677  | 79866276  | chr18 | 34736820 | 34737169 |
| chr14 | 79940476  | 79940625  | chr18 | 35053340 | 35053440 |
| chr14 | 79967949  | 79968549  | chr18 | 35820252 | 35820501 |
| chr14 | 81312555  | 81312704  | chr18 | 35914725 | 35914877 |
| chr14 | 81313455  | 81313855  | chr18 | 36157838 | 36158438 |
| chr14 | 81367843  | 81368143  | chr18 | 36473997 | 36474197 |
| chr14 | 81545856  | 81546256  | chr18 | 36857093 | 36857442 |
| chr14 | 81728929  | 81729578  | chr18 | 37152973 | 37153873 |
| chr14 | 100960980 | 100961080 | chr18 | 37160773 | 37161422 |
| chr14 | 101212694 | 101213150 | chr18 | 37185500 | 37185600 |
| chr14 | 103552614 | 103553163 | chr18 | 37204000 | 37204200 |
| chr14 | 103565181 | 103565374 | chr18 | 37337351 | 37337402 |
| chr14 | 104896795 | 104897344 | chr18 | 37337551 | 37337751 |
| chr14 | 105425195 | 105425353 | chr18 | 37494016 | 37494216 |
| chr14 | 105425395 | 105425844 | chr18 | 37711786 | 37712135 |
| chr14 | 106380974 | 106381074 | chr18 | 37849087 | 37849387 |
| chr14 | 107174723 | 107174823 | chr18 | 37871824 | 37871977 |
| chr14 | 107813200 | 107813500 | chr18 | 37873624 | 37874083 |
| chr14 | 117009435 | 117009684 | chr18 | 37878807 | 37879056 |
| chr14 | 119714947 | 119715765 | chr18 | 37913487 | 37913644 |
| chr14 | 119716118 | 119716514 | chr18 | 37913887 | 37913987 |
| chr14 | 120518318 | 120518518 | chr18 | 37919039 | 37919388 |
| chr14 | 120517918 | 120518069 | chr18 | 37924391 | 37924491 |
| chr14 | 120586378 | 120586578 | chr18 | 37938675 | 37938931 |
| chr14 | 120799663 | 120801063 | chr18 | 38013001 | 38013201 |
| chr14 | 121705399 | 121705799 | chr18 | 38402896 | 38403045 |
| chr14 | 121705948 | 121706148 | chr18 | 38611908 | 38612108 |
| chr14 | 122573916 | 122574016 | chr18 | 38792867 | 38792916 |
| chr14 | 122764837 | 122765386 | chr18 | 38793416 | 38794467 |
| chr14 | 122912089 | 122912189 | chr18 | 39685040 | 39685140 |
| chr14 | 123768645 | 123768745 | chr18 | 40412633 | 40413390 |
| chr14 | 123769096 | 123769300 | chr18 | 42192442 | 42192740 |
| chr14 | 123843484 | 123844084 | chr18 | 42704821 | 42705121 |
| chr14 | 123844833 | 123845033 | chr18 | 43092873 | 43093276 |
| chr14 | 124136698 | 124136847 | chr18 | 45752779 | 45753330 |
| chr14 | 124138244 | 124139093 | chr18 | 45753979 | 45754379 |



|       |           |           |       |          |          |
|-------|-----------|-----------|-------|----------|----------|
| chr14 | 124197914 | 124198070 | chr18 | 46406302 | 46406451 |
| chr19 | 3281146   | 3281346   | chr18 | 46791180 | 46791629 |
| chr19 | 3281695   | 3282646   | chr18 | 46935410 | 46935510 |
| chr19 | 3333812   | 3334012   | chr18 | 46936359 | 46936559 |
| chr19 | 3388568   | 3388768   | chr18 | 47115291 | 47115591 |
| chr19 | 3414506   | 3414557   | chr18 | 47115740 | 47116255 |
| chr19 | 3767520   | 3767620   | chr18 | 50472347 | 50472547 |
| chr19 | 3905130   | 3905479   | chr18 | 53369803 | 53370303 |
| chr19 | 3913860   | 3914060   | chr18 | 53611946 | 53612195 |
| chr19 | 3930016   | 3930516   | chr18 | 53938389 | 53938638 |
| chr19 | 3930865   | 3931465   | chr18 | 56767101 | 56767201 |
| chr19 | 3934018   | 3934580   | chr18 | 57119436 | 57119636 |
| chr19 | 3935118   | 3935218   | chr18 | 57327650 | 57327799 |
| chr19 | 3935567   | 3935667   | chr18 | 58853120 | 58853420 |
| chr19 | 3985409   | 3985460   | chr18 | 60785576 | 60785776 |
| chr19 | 3986909   | 3987009   | chr18 | 60968787 | 60968887 |
| chr19 | 3990851   | 3991751   | chr18 | 61104278 | 61105778 |
| chr19 | 3991900   | 3992900   | chr18 | 61117570 | 61117970 |
| chr19 | 3998579   | 3999528   | chr18 | 61118119 | 61118533 |
| chr19 | 4001479   | 4001579   | chr18 | 61370938 | 61371038 |
| chr19 | 4001828   | 4002079   | chr18 | 61703167 | 61703368 |
| chr19 | 4003699   | 4003848   | chr18 | 61749051 | 61749151 |
| chr19 | 4037512   | 4038261   | chr18 | 61880673 | 61880773 |
| chr19 | 4042680   | 4042770   | chr18 | 61881622 | 61882322 |
| chr19 | 4082289   | 4082389   | chr18 | 61902574 | 61902674 |
| chr19 | 4083489   | 4083938   | chr18 | 61919870 | 61920119 |
| chr19 | 4137931   | 4138531   | chr18 | 61980201 | 61980401 |
| chr19 | 4153194   | 4153794   | chr18 | 61980550 | 61980750 |
| chr19 | 4190573   | 4190873   | chr18 | 62105686 | 62105786 |
| chr19 | 4202552   | 4203063   | chr18 | 62517842 | 62518142 |
| chr19 | 4270072   | 4270921   | chr18 | 63223857 | 63224457 |
| chr19 | 4283397   | 4283497   | chr18 | 63224708 | 63224806 |
| chr19 | 4306415   | 4306515   | chr18 | 64533952 | 64534159 |
| chr19 | 4498432   | 4499032   | chr18 | 64710544 | 64710644 |
| chr19 | 4709222   | 4709371   | chr18 | 64854439 | 64854539 |
| chr19 | 4837714   | 4838114   | chr18 | 64855588 | 64855688 |
| chr19 | 4840014   | 4840314   | chr18 | 65624335 | 65624735 |
| chr19 | 4840563   | 4840864   | chr18 | 65773368 | 65773520 |
| chr19 | 4854128   | 4854377   | chr18 | 65994216 | 65994316 |
| chr19 | 4854728   | 4855328   | chr18 | 66196150 | 66196350 |
| chr19 | 4878752   | 4879252   | chr18 | 66485371 | 66485520 |
| chr19 | 4907661   | 4908261   | chr18 | 66652368 | 66652468 |
| chr19 | 4943099   | 4943299   | chr18 | 67053911 | 67054060 |

|       |         |         |       |          |          |
|-------|---------|---------|-------|----------|----------|
| chr19 | 5026005 | 5026205 | chr18 | 67327813 | 67327913 |
| chr19 | 5026454 | 5026554 | chr18 | 67439269 | 67439518 |
| chr19 | 5041103 | 5041252 | chr18 | 67482861 | 67483061 |
| chr19 | 5048807 | 5049107 | chr18 | 67584569 | 67584769 |
| chr19 | 5050961 | 5051061 | chr18 | 67744612 | 67745061 |
| chr19 | 5087877 | 5088277 | chr18 | 67746160 | 67746862 |
| chr19 | 5088826 | 5088926 | chr18 | 67747516 | 67748211 |
| chr19 | 5097918 | 5098018 | chr18 | 67835818 | 67835921 |
| chr19 | 5098267 | 5098467 | chr18 | 67919871 | 67920220 |
| chr19 | 5099418 | 5099518 | chr18 | 67968714 | 67968814 |
| chr19 | 5273268 | 5273381 | chr18 | 68126995 | 68127095 |
| chr19 | 5274432 | 5274832 | chr18 | 68624610 | 68624910 |
| chr19 | 5298397 | 5298797 | chr18 | 73948088 | 73948188 |
| chr19 | 5333740 | 5333789 | chr18 | 74008931 | 74009231 |
| chr19 | 5335740 | 5335889 | chr18 | 74009580 | 74009780 |
| chr19 | 5365261 | 5365561 | chr18 | 74053423 | 74053572 |
| chr19 | 5447897 | 5447997 | chr18 | 74259117 | 74259217 |
| chr19 | 5457098 | 5457149 | chr18 | 74410150 | 74410350 |
| chr19 | 5468598 | 5469247 | chr18 | 74461729 | 74462178 |
| chr19 | 5490765 | 5490914 | chr18 | 74636061 | 74636161 |
| chr19 | 5503736 | 5504136 | chr18 | 74973403 | 74973603 |
| chr19 | 5510589 | 5510689 | chr18 | 75155473 | 75156122 |
| chr19 | 5512345 | 5512445 | chr18 | 75198847 | 75199207 |
| chr19 | 5566073 | 5566173 | chr18 | 75212614 | 75213163 |
| chr19 | 5599972 | 5600472 | chr18 | 75560271 | 75560771 |
| chr19 | 5600721 | 5600921 | chr18 | 75892497 | 75892897 |
| chr19 | 5609529 | 5609729 | chr18 | 77337335 | 77337494 |
| chr19 | 5664751 | 5664951 | chr18 | 77459029 | 77459129 |
| chr19 | 5687130 | 5687430 | chr18 | 78040682 | 78041031 |
| chr19 | 5702675 | 5702924 | chr18 | 78041182 | 78041331 |
| chr19 | 5726019 | 5726319 | chr18 | 78062942 | 78063651 |
| chr19 | 5727271 | 5727620 | chr18 | 78068319 | 78068419 |
| chr19 | 5729133 | 5729233 | chr18 | 78069645 | 78069794 |
| chr19 | 5771550 | 5771650 | chr18 | 80486651 | 80486800 |
| chr19 | 5877008 | 5877157 | chr18 | 80701535 | 80701635 |
| chr19 | 5912323 | 5912423 | chr18 | 80944626 | 80944926 |
| chr19 | 5925074 | 5925430 | chr18 | 81165126 | 81165526 |
| chr19 | 5925974 | 5926223 | chr18 | 82679727 | 82679927 |
| chr19 | 6014651 | 6014951 | chr18 | 84617265 | 84618111 |
| chr19 | 6057848 | 6057948 | chr18 | 84924832 | 84924981 |
| chr19 | 6058297 | 6058397 | chr18 | 86599042 | 86599991 |
| chr19 | 6067856 | 6067956 | chr18 | 89973622 | 89973722 |
| chr19 | 6084145 | 6084996 | chr18 | 89973971 | 89974171 |

|       |          |          |              |          |          |
|-------|----------|----------|--------------|----------|----------|
| chr19 | 6104297  | 6104446  | chr13_randor | 31404    | 31504    |
| chr19 | 6120238  | 6120538  | chr13_randor | 132372   | 132882   |
| chr19 | 6163957  | 6164357  | chr7         | 3929001  | 3929150  |
| chr19 | 6235331  | 6235480  | chr7         | 3966658  | 3966911  |
| chr19 | 6241690  | 6241741  | chr7         | 3977229  | 3977478  |
| chr19 | 6335253  | 6335402  | chr7         | 3993440  | 3994091  |
| chr19 | 6341598  | 6341699  | chr7         | 4364501  | 4364756  |
| chr19 | 6383928  | 6384128  | chr7         | 4436972  | 4437072  |
| chr19 | 6400110  | 6400310  | chr7         | 4449489  | 4449538  |
| chr19 | 6427815  | 6427915  | chr7         | 4464319  | 4464868  |
| chr19 | 6542555  | 6542955  | chr7         | 4764958  | 4765307  |
| chr19 | 6922037  | 6922137  | chr7         | 4822609  | 4823360  |
| chr19 | 6922286  | 6922586  | chr7         | 4833898  | 4834247  |
| chr19 | 6993214  | 6993414  | chr7         | 5225760  | 5226109  |
| chr19 | 7003206  | 7003306  | chr7         | 5313824  | 5314573  |
| chr19 | 7003571  | 7003771  | chr7         | 5332394  | 5332643  |
| chr19 | 7024239  | 7024439  | chr7         | 5380221  | 5380521  |
| chr19 | 7056586  | 7056686  | chr7         | 5426121  | 5426221  |
| chr19 | 7102471  | 7102622  | chr7         | 6586706  | 6586855  |
| chr19 | 7166421  | 7167372  | chr7         | 6683261  | 6683613  |
| chr19 | 7167521  | 7168172  | chr7         | 7032467  | 7032567  |
| chr19 | 7168321  | 7168421  | chr7         | 7600332  | 7600632  |
| chr19 | 7187217  | 7187670  | chr7         | 14748803 | 14749554 |
| chr19 | 7422752  | 7422852  | chr7         | 14782853 | 14783410 |
| chr19 | 7502578  | 7502874  | chr7         | 15151524 | 15151673 |
| chr19 | 7564717  | 7564817  | chr7         | 15192254 | 15192554 |
| chr19 | 7565066  | 7565166  | chr7         | 15195933 | 15196133 |
| chr19 | 8673573  | 8673673  | chr7         | 15236530 | 15236830 |
| chr19 | 8821754  | 8822554  | chr7         | 15248466 | 15248666 |
| chr19 | 8853279  | 8853379  | chr7         | 15548050 | 15548149 |
| chr19 | 8920337  | 8921637  | chr7         | 17935902 | 17936202 |
| chr19 | 8978045  | 8978345  | chr7         | 17957732 | 17957900 |
| chr19 | 9011892  | 9012592  | chr7         | 18110718 | 18110818 |
| chr19 | 9023154  | 9023354  | chr7         | 18321313 | 18321462 |
| chr19 | 9047132  | 9047232  | chr7         | 18489713 | 18489813 |
| chr19 | 9047481  | 9047781  | chr7         | 18627529 | 18627729 |
| chr19 | 9049332  | 9049481  | chr7         | 18750854 | 18751003 |
| chr19 | 9169460  | 9169609  | chr7         | 18902782 | 18903331 |
| chr19 | 9170160  | 9170509  | chr7         | 18935630 | 18935730 |
| chr19 | 10079049 | 10079749 | chr7         | 18936179 | 18936379 |
| chr19 | 10099063 | 10099212 | chr7         | 19039546 | 19039846 |
| chr19 | 10099563 | 10099663 | chr7         | 19041351 | 19041900 |
| chr19 | 10100112 | 10100263 | chr7         | 19070655 | 19070804 |

|       |          |          |      |          |          |
|-------|----------|----------|------|----------|----------|
| chr19 | 10100412 | 10100613 | chr7 | 21035215 | 21035564 |
| chr19 | 10354523 | 10354723 | chr7 | 21036864 | 21037667 |
| chr19 | 10355272 | 10355472 | chr7 | 21064869 | 21065069 |
| chr19 | 10685659 | 10686108 | chr7 | 21088175 | 21088375 |
| chr19 | 10687459 | 10687608 | chr7 | 21096419 | 21096619 |
| chr19 | 10770849 | 10770949 | chr7 | 21240558 | 21240807 |
| chr19 | 10771098 | 10771198 | chr7 | 22208150 | 22208950 |
| chr19 | 10820509 | 10822409 | chr7 | 22197362 | 22197413 |
| chr19 | 10822758 | 10823058 | chr7 | 22100483 | 22100683 |
| chr19 | 10912347 | 10912847 | chr7 | 22035013 | 22035113 |
| chr19 | 10951214 | 10951314 | chr7 | 22030770 | 22030870 |
| chr19 | 10963178 | 10963627 | chr7 | 22030170 | 22030619 |
| chr19 | 11074785 | 11075334 | chr7 | 21893051 | 21893400 |
| chr19 | 11618784 | 11619033 | chr7 | 21786041 | 21786141 |
| chr19 | 11776989 | 11777538 | chr7 | 21785792 | 21785892 |
| chr19 | 11994270 | 11994370 | chr7 | 21643966 | 21644477 |
| chr19 | 12202458 | 12202758 | chr7 | 21642671 | 21642826 |
| chr19 | 14680993 | 14681193 | chr7 | 25246774 | 25247623 |
| chr19 | 16956291 | 16956440 | chr7 | 26160368 | 26161130 |
| chr19 | 19083574 | 19083923 | chr7 | 26194965 | 26195265 |
| chr19 | 21735540 | 21735640 | chr7 | 26259305 | 26259654 |
| chr19 | 22218999 | 22219700 | chr7 | 26260905 | 26261105 |
| chr19 | 23529805 | 23529905 | chr7 | 26261254 | 26261354 |
| chr19 | 24256220 | 24256320 | chr7 | 26406166 | 26406366 |
| chr19 | 24361969 | 24362069 | chr7 | 26407019 | 26407615 |
| chr19 | 24362518 | 24362618 | chr7 | 26408366 | 26408715 |
| chr19 | 24559406 | 24559506 | chr7 | 26569736 | 26569936 |
| chr19 | 24560357 | 24560757 | chr7 | 26570636 | 26570786 |
| chr19 | 24753887 | 24754287 | chr7 | 26623189 | 26623538 |
| chr19 | 25586988 | 25587388 | chr7 | 26764594 | 26764794 |
| chr19 | 25692219 | 25692324 | chr7 | 26938372 | 26938472 |
| chr19 | 26686346 | 26686746 | chr7 | 26994538 | 26994738 |
| chr19 | 26828734 | 26828935 | chr7 | 27098878 | 27099578 |
| chr19 | 27404227 | 27404327 | chr7 | 27143936 | 27144536 |
| chr19 | 28093974 | 28094623 | chr7 | 27158933 | 27159082 |
| chr19 | 28624203 | 28624303 | chr7 | 27167405 | 27167554 |
| chr19 | 29073476 | 29073925 | chr7 | 27252333 | 27252533 |
| chr19 | 29130934 | 29131034 | chr7 | 27256765 | 27256965 |
| chr19 | 29131885 | 29131985 | chr7 | 27259120 | 27259220 |
| chr19 | 29417179 | 29417528 | chr7 | 27480290 | 27480539 |
| chr19 | 29800120 | 29800276 | chr7 | 27546579 | 27546879 |
| chr19 | 30031932 | 30033081 | chr7 | 27548228 | 27548428 |
| chr19 | 30086072 | 30086378 | chr7 | 27615928 | 27616028 |

|       |          |          |      |          |          |
|-------|----------|----------|------|----------|----------|
| chr19 | 30315670 | 30315770 | chr7 | 27649719 | 27649830 |
| chr19 | 31165553 | 31166402 | chr7 | 29042810 | 29042920 |
| chr19 | 34960700 | 34961200 | chr7 | 29118138 | 29118238 |
| chr19 | 36141627 | 36141833 | chr7 | 29119738 | 29120487 |
| chr19 | 36203180 | 36203280 | chr7 | 29309155 | 29309304 |
| chr19 | 36461902 | 36462002 | chr7 | 29334553 | 29334656 |
| chr19 | 36462451 | 36462951 | chr7 | 29334805 | 29335005 |
| chr19 | 36637815 | 36637915 | chr7 | 29414488 | 29414637 |
| chr19 | 36821850 | 36821889 | chr7 | 29910921 | 29911021 |
| chr19 | 37634178 | 37634378 | chr7 | 29911270 | 29911370 |
| chr19 | 37780039 | 37780138 | chr7 | 30030839 | 30031339 |
| chr19 | 38138124 | 38138724 | chr7 | 30040592 | 30040692 |
| chr19 | 38139024 | 38139173 | chr7 | 30127907 | 30128316 |
| chr19 | 38208833 | 38208933 | chr7 | 30162562 | 30162711 |
| chr19 | 38216582 | 38216782 | chr7 | 30200146 | 30200346 |
| chr19 | 38479527 | 38479627 | chr7 | 30233355 | 30233755 |
| chr19 | 38920114 | 38920214 | chr7 | 30240655 | 30240755 |
| chr19 | 39013338 | 39013489 | chr7 | 30297873 | 30297973 |
| chr19 | 40368102 | 40368402 | chr7 | 30298124 | 30299073 |
| chr19 | 40368551 | 40368651 | chr7 | 30313120 | 30313220 |
| chr19 | 40548267 | 40549016 | chr7 | 30401762 | 30402062 |
| chr19 | 40683538 | 40683987 | chr7 | 30459473 | 30459573 |
| chr19 | 40925696 | 40925802 | chr7 | 30648854 | 30649054 |
| chr19 | 41090404 | 41090553 | chr7 | 30670190 | 30670641 |
| chr19 | 41090604 | 41090953 | chr7 | 30694810 | 30694959 |
| chr19 | 41123785 | 41123942 | chr7 | 30823307 | 30823407 |
| chr19 | 41643707 | 41643859 | chr7 | 31029825 | 31029974 |
| chr19 | 41688581 | 41688931 | chr7 | 31030126 | 31030375 |
| chr19 | 41689083 | 41689180 | chr7 | 31041809 | 31042158 |
| chr19 | 42077980 | 42078080 | chr7 | 31093471 | 31093671 |
| chr19 | 42130206 | 42131506 | chr7 | 31093920 | 31094020 |
| chr19 | 42139519 | 42140819 | chr7 | 31398346 | 31398443 |
| chr19 | 42174951 | 42175655 | chr7 | 31587923 | 31588123 |
| chr19 | 42243052 | 42243552 | chr7 | 31645293 | 31645442 |
| chr19 | 42265538 | 42266189 | chr7 | 31721488 | 31721641 |
| chr19 | 42529226 | 42529275 | chr7 | 32168879 | 32169630 |
| chr19 | 42612622 | 42613222 | chr7 | 32473861 | 32474512 |
| chr19 | 42874014 | 42874563 | chr7 | 32497830 | 32498179 |
| chr19 | 42875014 | 42875363 | chr7 | 32511643 | 32511799 |
| chr19 | 43620627 | 43621378 | chr7 | 32573329 | 32573529 |
| chr19 | 43622027 | 43622132 | chr7 | 32625389 | 32625489 |
| chr19 | 43785293 | 43785393 | chr7 | 32637679 | 32638130 |
| chr19 | 43847414 | 43847513 | chr7 | 32649082 | 32649282 |

|       |          |          |      |          |          |
|-------|----------|----------|------|----------|----------|
| chr19 | 44017286 | 44017594 | chr7 | 32685406 | 32685602 |
| chr19 | 44082138 | 44082651 | chr7 | 32717056 | 32717205 |
| chr19 | 44202963 | 44203063 | chr7 | 32741045 | 32741145 |
| chr19 | 44297256 | 44297405 | chr7 | 32903761 | 32903961 |
| chr19 | 44428392 | 44429449 | chr7 | 32916861 | 32916961 |
| chr19 | 44587241 | 44587790 | chr7 | 32937699 | 32937750 |
| chr19 | 44589141 | 44589241 | chr7 | 32988272 | 32988572 |
| chr19 | 44851262 | 44851411 | chr7 | 35994695 | 35994795 |
| chr19 | 44853311 | 44853411 | chr7 | 36029756 | 36029856 |
| chr19 | 45084812 | 45084912 | chr7 | 36146387 | 36146536 |
| chr19 | 45101826 | 45101926 | chr7 | 36514324 | 36514573 |
| chr19 | 45102175 | 45103026 | chr7 | 36673903 | 36674103 |
| chr19 | 45170707 | 45170807 | chr7 | 36918135 | 36918335 |
| chr19 | 45246201 | 45246350 | chr7 | 36979380 | 36980080 |
| chr19 | 45332558 | 45332658 | chr7 | 37195201 | 37195301 |
| chr19 | 45838691 | 45839591 | chr7 | 37258770 | 37259019 |
| chr19 | 45910972 | 45911172 | chr7 | 37445630 | 37445830 |
| chr19 | 46134890 | 46135239 | chr7 | 37446679 | 37446779 |
| chr19 | 46243494 | 46243594 | chr7 | 37447535 | 37447984 |
| chr19 | 46400386 | 46400786 | chr7 | 38557395 | 38557495 |
| chr19 | 46433793 | 46434242 | chr7 | 46493771 | 46494024 |
| chr19 | 46490886 | 46491086 | chr7 | 54160483 | 54160832 |
| chr19 | 46491235 | 46491335 | chr7 | 55541295 | 55542244 |
| chr19 | 46492586 | 46492886 | chr7 | 56308897 | 56309197 |
| chr19 | 46668533 | 46668633 | chr7 | 57955584 | 57955733 |
| chr19 | 46694926 | 46695075 | chr7 | 58276059 | 58276508 |
| chr19 | 46770143 | 46770343 | chr7 | 58574591 | 58574741 |
| chr19 | 46856465 | 46856765 | chr7 | 58889511 | 58889611 |
| chr19 | 47233763 | 47233912 | chr7 | 59084807 | 59085207 |
| chr19 | 47234363 | 47235012 | chr7 | 59138929 | 59139029 |
| chr19 | 47357184 | 47358084 | chr7 | 59139678 | 59139778 |
| chr19 | 47675736 | 47676039 | chr7 | 59167360 | 59167560 |
| chr19 | 47788563 | 47789013 | chr7 | 59168218 | 59168318 |
| chr19 | 47959471 | 47959920 | chr7 | 59192439 | 59192639 |
| chr19 | 47961171 | 47961420 | chr7 | 59196393 | 59196693 |
| chr19 | 53134310 | 53135110 | chr7 | 59213865 | 59214214 |
| chr19 | 53135459 | 53135560 | chr7 | 59478809 | 59479258 |
| chr19 | 53405897 | 53406646 | chr7 | 59492094 | 59492345 |
| chr19 | 53424139 | 53424939 | chr7 | 59499824 | 59500473 |
| chr19 | 53998183 | 53998934 | chr7 | 59584481 | 59584630 |
| chr19 | 54140407 | 54140507 | chr7 | 59629211 | 59629302 |
| chr19 | 55195032 | 55195132 | chr7 | 59640080 | 59640329 |
| chr19 | 55411380 | 55411780 | chr7 | 59658470 | 59659019 |

|       |          |          |      |          |          |
|-------|----------|----------|------|----------|----------|
| chr19 | 55412429 | 55412529 | chr7 | 59766903 | 59767552 |
| chr19 | 56381667 | 56382016 | chr7 | 59796940 | 59798540 |
| chr19 | 56382867 | 56383067 | chr7 | 59811327 | 59811527 |
| chr19 | 56486014 | 56486114 | chr7 | 59882861 | 59882961 |
| chr19 | 56490858 | 56491058 | chr7 | 59924893 | 59924993 |
| chr19 | 56491712 | 56492009 | chr7 | 59925542 | 59925942 |
| chr19 | 56644546 | 56644646 | chr7 | 59978163 | 59978512 |
| chr19 | 56818450 | 56818550 | chr7 | 60056182 | 60056282 |
| chr19 | 56921338 | 56921838 | chr7 | 60061715 | 60061815 |
| chr19 | 56924441 | 56924641 | chr7 | 60062766 | 60062866 |
| chr19 | 56925642 | 56925743 | chr7 | 60102504 | 60102704 |
| chr19 | 56925893 | 56926142 | chr7 | 60132817 | 60133266 |
| chr19 | 57104156 | 57104356 | chr7 | 60257711 | 60257911 |
| chr19 | 57104907 | 57105107 | chr7 | 60259660 | 60260260 |
| chr19 | 57312062 | 57312162 | chr7 | 60263480 | 60263687 |
| chr19 | 57707047 | 57707147 | chr7 | 60270606 | 60270706 |
| chr19 | 58607651 | 58607751 | chr7 | 60284545 | 60284945 |
| chr19 | 58766343 | 58766553 | chr7 | 60325634 | 60326183 |
| chr19 | 58890044 | 58890144 | chr7 | 60346501 | 60346601 |
| chr19 | 58891600 | 58891747 | chr7 | 60360645 | 60360745 |
| chr19 | 58891897 | 58892096 | chr7 | 60360994 | 60361094 |
| chr19 | 58957331 | 58958524 | chr7 | 60361945 | 60362045 |
| chr19 | 59171648 | 59171848 | chr7 | 60369783 | 60369883 |
| chr19 | 59356456 | 59356656 | chr7 | 60401743 | 60401892 |
| chr19 | 59442059 | 59442163 | chr7 | 60402492 | 60402592 |
| chr19 | 59553901 | 59554001 | chr7 | 60456956 | 60457056 |
| chr19 | 60040207 | 60040307 | chr7 | 60458207 | 60458307 |
| chr19 | 60852929 | 60853029 | chr7 | 60458756 | 60458956 |
| chr19 | 61325120 | 61325320 | chr7 | 60468468 | 60469017 |
| chr18 | 3507355  | 3507555  | chr7 | 60475246 | 60475446 |
| chr18 | 4353341  | 4353441  | chr7 | 60513760 | 60514309 |
| chr18 | 4634827  | 4634927  | chr7 | 60743207 | 60744707 |
| chr18 | 6241547  | 6241647  | chr7 | 60822910 | 60823010 |
| chr18 | 7868636  | 7868736  | chr7 | 60883760 | 60884160 |
| chr18 | 9212630  | 9212730  | chr7 | 61019551 | 61019651 |
| chr18 | 10181415 | 10181615 | chr7 | 61038862 | 61039062 |
| chr18 | 10706494 | 10706694 | chr7 | 61315973 | 61316173 |
| chr18 | 10706843 | 10706943 | chr7 | 61317028 | 61317133 |
| chr18 | 10725622 | 10725722 | chr7 | 61438552 | 61438652 |
| chr18 | 11052809 | 11052958 | chr7 | 61439001 | 61439201 |
| chr18 | 12012156 | 12012456 | chr7 | 61488233 | 61488533 |
| chr18 | 12340828 | 12340987 | chr7 | 61502432 | 61502532 |
| chr18 | 12342228 | 12342377 | chr7 | 64006790 | 64006898 |

|       |          |          |      |          |          |
|-------|----------|----------|------|----------|----------|
| chr18 | 12817248 | 12817348 | chr7 | 64279056 | 64279405 |
| chr18 | 12817997 | 12818097 | chr7 | 64401873 | 64402322 |
| chr18 | 14857063 | 14857967 | chr7 | 64421078 | 64421278 |
| chr18 | 15893347 | 15893507 | chr7 | 64617285 | 64617585 |
| chr18 | 20731698 | 20732098 | chr7 | 66154248 | 66154348 |
| chr18 | 21118540 | 21118689 | chr7 | 66521724 | 66522081 |
| chr18 | 21474479 | 21474679 | chr7 | 70483336 | 70483536 |
| chr18 | 22344988 | 22345537 | chr7 | 70571258 | 70571807 |
| chr18 | 23976475 | 23976724 | chr7 | 71907904 | 71908353 |
| chr18 | 24128777 | 24129126 | chr7 | 73179163 | 73179663 |
| chr18 | 25343260 | 25343360 | chr7 | 73749855 | 73749955 |
| chr18 | 25927849 | 25928198 | chr7 | 77628277 | 77628826 |
| chr18 | 30448442 | 30449042 | chr7 | 77860841 | 77860941 |
| chr18 | 31785949 | 31786100 | chr7 | 78356065 | 78356272 |
| chr18 | 31810380 | 31810580 | chr7 | 78808629 | 78809078 |
| chr18 | 31936081 | 31936481 | chr7 | 80107229 | 80107486 |
| chr18 | 32105804 | 32105953 | chr7 | 80476727 | 80477027 |
| chr18 | 32126034 | 32126234 | chr7 | 81096498 | 81096598 |
| chr18 | 32126383 | 32126583 | chr7 | 81106282 | 81106382 |
| chr18 | 32990280 | 32990380 | chr7 | 81124667 | 81124824 |
| chr18 | 33115350 | 33115450 | chr7 | 81256093 | 81256193 |
| chr18 | 33658229 | 33658538 | chr7 | 81639269 | 81639318 |
| chr18 | 34203371 | 34203462 | chr7 | 81789466 | 81789866 |
| chr18 | 34774493 | 34775042 | chr7 | 82368972 | 82369521 |
| chr18 | 35032916 | 35033816 | chr7 | 82715091 | 82715340 |
| chr18 | 35147957 | 35148057 | chr7 | 83165411 | 83165511 |
| chr18 | 35693500 | 35694058 | chr7 | 88429769 | 88430069 |
| chr18 | 35821952 | 35822201 | chr7 | 88971188 | 88971288 |
| chr18 | 35842750 | 35843150 | chr7 | 90265713 | 90265862 |
| chr18 | 35920022 | 35920522 | chr7 | 92995297 | 92995797 |
| chr18 | 35920673 | 35920771 | chr7 | 93311561 | 93311661 |
| chr18 | 35964862 | 35964962 | chr7 | 93313468 | 93313717 |
| chr18 | 36022851 | 36022951 | chr7 | 93470617 | 93470717 |
| chr18 | 36648629 | 36648729 | chr7 | 93548753 | 93548902 |
| chr18 | 36648879 | 36649581 | chr7 | 93885308 | 93885657 |
| chr18 | 36708957 | 36709057 | chr7 | 94034783 | 94035183 |
| chr18 | 36873730 | 36873830 | chr7 | 94077830 | 94078130 |
| chr18 | 36874479 | 36874582 | chr7 | 94160497 | 94160597 |
| chr18 | 36889159 | 36890011 | chr7 | 94161446 | 94161651 |
| chr18 | 36976113 | 36976462 | chr7 | 94211190 | 94211492 |
| chr18 | 37132651 | 37132751 | chr7 | 94442817 | 94442968 |
| chr18 | 37139540 | 37139989 | chr7 | 94443117 | 94443317 |
| chr18 | 37146264 | 37146413 | chr7 | 94533105 | 94533305 |



|       |          |          |      |           |           |
|-------|----------|----------|------|-----------|-----------|
| chr18 | 37167557 | 37167706 | chr7 | 94616408  | 94616608  |
| chr18 | 37213812 | 37213863 | chr7 | 94650022  | 94650122  |
| chr18 | 37283469 | 37283769 | chr7 | 94650571  | 94651422  |
| chr18 | 37458331 | 37458431 | chr7 | 94687423  | 94687523  |
| chr18 | 37629336 | 37629585 | chr7 | 94712100  | 94712500  |
| chr18 | 37635704 | 37635804 | chr7 | 94742550  | 94742699  |
| chr18 | 37636053 | 37636361 | chr7 | 94743203  | 94743503  |
| chr18 | 37848738 | 37849038 | chr7 | 94760034  | 94760234  |
| chr18 | 37853478 | 37853927 | chr7 | 94761234  | 94761583  |
| chr18 | 37867768 | 37868117 | chr7 | 94789501  | 94789601  |
| chr18 | 37883420 | 37883569 | chr7 | 94806015  | 94806164  |
| chr18 | 37914036 | 37914336 | chr7 | 94821032  | 94821132  |
| chr18 | 37924640 | 37924691 | chr7 | 95365470  | 95365719  |
| chr18 | 37938375 | 37938624 | chr7 | 95475403  | 95475503  |
| chr18 | 37945212 | 37945312 | chr7 | 95630790  | 95631341  |
| chr18 | 37947557 | 37947855 | chr7 | 95873429  | 95873529  |
| chr18 | 37948550 | 37948950 | chr7 | 95989481  | 95989581  |
| chr18 | 37955412 | 37955512 | chr7 | 96023277  | 96023827  |
| chr18 | 37999875 | 38000124 | chr7 | 96125279  | 96125379  |
| chr18 | 38008812 | 38008861 | chr7 | 96126230  | 96126483  |
| chr18 | 38011428 | 38011728 | chr7 | 96180757  | 96181106  |
| chr18 | 38147860 | 38148260 | chr7 | 96247884  | 96248084  |
| chr18 | 38149722 | 38149822 | chr7 | 96410050  | 96410250  |
| chr18 | 38190349 | 38190598 | chr7 | 97068868  | 97069030  |
| chr18 | 38192049 | 38192298 | chr7 | 98158018  | 98158167  |
| chr18 | 38404896 | 38405045 | chr7 | 98158218  | 98158318  |
| chr18 | 38531785 | 38532334 | chr7 | 98306163  | 98306363  |
| chr18 | 38792967 | 38793367 | chr7 | 98307619  | 98307968  |
| chr18 | 38795067 | 38795320 | chr7 | 98508430  | 98508780  |
| chr18 | 39111633 | 39112133 | chr7 | 98831936  | 98832236  |
| chr18 | 39113682 | 39113782 | chr7 | 99430355  | 99430517  |
| chr18 | 39186078 | 39186327 | chr7 | 102699962 | 102700062 |
| chr18 | 39966730 | 39967030 | chr7 | 103939629 | 103939829 |
| chr18 | 42247256 | 42247356 | chr7 | 104054695 | 104055095 |
| chr18 | 42773245 | 42773536 | chr7 | 104552237 | 104552461 |
| chr18 | 43091924 | 43092024 | chr7 | 104879036 | 104879285 |
| chr18 | 43586810 | 43587159 | chr7 | 107059472 | 107059672 |
| chr18 | 44623905 | 44624354 | chr7 | 107059821 | 107060121 |
| chr18 | 46474876 | 46474976 | chr7 | 107093270 | 107093470 |
| chr18 | 47152756 | 47152905 | chr7 | 107297433 | 107297582 |
| chr18 | 47152956 | 47153105 | chr7 | 110594448 | 110594897 |
| chr18 | 47562621 | 47562870 | chr7 | 111374429 | 111375178 |
| chr18 | 48239011 | 48239360 | chr7 | 111753629 | 111753678 |

|       |          |          |      |           |           |
|-------|----------|----------|------|-----------|-----------|
| chr18 | 52723793 | 52723891 | chr7 | 111755229 | 111755378 |
| chr18 | 52810120 | 52810275 | chr7 | 111840862 | 111840962 |
| chr18 | 52886743 | 52887143 | chr7 | 112002818 | 112002918 |
| chr18 | 54055784 | 54055984 | chr7 | 112003567 | 112003867 |
| chr18 | 56594075 | 56594524 | chr7 | 112161699 | 112161799 |
| chr18 | 56766452 | 56766752 | chr7 | 112342957 | 112343157 |
| chr18 | 56781386 | 56781635 | chr7 | 112541486 | 112541786 |
| chr18 | 56900811 | 56901011 | chr7 | 112601445 | 112602396 |
| chr18 | 58070616 | 58070965 | chr7 | 113201337 | 113201437 |
| chr18 | 58072016 | 58072116 | chr7 | 113680588 | 113681337 |
| chr18 | 58405093 | 58405294 | chr7 | 113766173 | 113766273 |
| chr18 | 59030302 | 59030402 | chr7 | 113851620 | 113852020 |
| chr18 | 59030951 | 59031151 | chr7 | 114267810 | 114268010 |
| chr18 | 60785327 | 60785527 | chr7 | 114785066 | 114785215 |
| chr18 | 60907377 | 60907777 | chr7 | 114874943 | 114875098 |
| chr18 | 60968936 | 60969039 | chr7 | 114973336 | 114973436 |
| chr18 | 61119470 | 61119819 | chr7 | 114994158 | 114994658 |
| chr18 | 61230387 | 61230487 | chr7 | 115015561 | 115015810 |
| chr18 | 61297610 | 61298110 | chr7 | 115109362 | 115109562 |
| chr18 | 61414137 | 61414437 | chr7 | 115207055 | 115207355 |
| chr18 | 61749600 | 61749700 | chr7 | 115848819 | 115849068 |
| chr18 | 61881022 | 61881373 | chr7 | 115884777 | 115884926 |
| chr18 | 61901274 | 61901423 | chr7 | 115893738 | 115893838 |
| chr18 | 61902728 | 61903024 | chr7 | 115921559 | 115921659 |
| chr18 | 61903174 | 61903325 | chr7 | 115922759 | 115922859 |
| chr18 | 61920270 | 61920519 | chr7 | 116338676 | 116338976 |
| chr18 | 62146722 | 62146922 | chr7 | 116371034 | 116371234 |
| chr18 | 62374213 | 62374313 | chr7 | 116576349 | 116576549 |
| chr18 | 64682605 | 64682854 | chr7 | 116710471 | 116710671 |
| chr18 | 64682905 | 64683054 | chr7 | 116711250 | 116711350 |
| chr18 | 65890406 | 65890655 | chr7 | 116767974 | 116768074 |
| chr18 | 65994865 | 65994965 | chr7 | 116941017 | 116941273 |
| chr18 | 66067032 | 66067781 | chr7 | 116985818 | 116986120 |
| chr18 | 66196399 | 66196499 | chr7 | 117089092 | 117089141 |
| chr18 | 66485571 | 66485671 | chr7 | 117187605 | 117188462 |
| chr18 | 67280974 | 67281274 | chr7 | 117859992 | 117860092 |
| chr18 | 67281528 | 67281725 | chr7 | 117952089 | 117952646 |
| chr18 | 67327064 | 67327264 | chr7 | 118067124 | 118067379 |
| chr18 | 67397461 | 67397715 | chr7 | 118114498 | 118114755 |
| chr18 | 67657987 | 67658187 | chr7 | 118171376 | 118171625 |
| chr18 | 68625059 | 68625159 | chr7 | 118438328 | 118438677 |
| chr18 | 69390315 | 69390609 | chr7 | 118680902 | 118681102 |
| chr18 | 69391559 | 69391859 | chr7 | 118691116 | 118691207 |

|              |          |          |      |           |           |
|--------------|----------|----------|------|-----------|-----------|
| chr18        | 69392008 | 69392508 | chr7 | 119901007 | 119901307 |
| chr18        | 70118908 | 70119508 | chr7 | 119904814 | 119904963 |
| chr18        | 70119657 | 70119957 | chr7 | 119925866 | 119926266 |
| chr18        | 70666183 | 70666632 | chr7 | 119982993 | 119983093 |
| chr18        | 70725842 | 70726151 | chr7 | 120054161 | 120054761 |
| chr18        | 73766126 | 73766226 | chr7 | 120055614 | 120055714 |
| chr18        | 74972354 | 74972454 | chr7 | 120237294 | 120237394 |
| chr18        | 75194602 | 75194702 | chr7 | 120237944 | 120238044 |
| chr18        | 75890997 | 75891197 | chr7 | 120245134 | 120245234 |
| chr18        | 75891446 | 75891697 | chr7 | 120253954 | 120254054 |
| chr18        | 75893046 | 75893346 | chr7 | 120311434 | 120311883 |
| chr18        | 76013420 | 76013620 | chr7 | 121370490 | 121370748 |
| chr18        | 77203324 | 77203473 | chr7 | 122090451 | 122090851 |
| chr18        | 77215242 | 77215942 | chr7 | 123039054 | 123039154 |
| chr18        | 77216291 | 77216542 | chr7 | 123323276 | 123323630 |
| chr18        | 77216996 | 77217091 | chr7 | 123506658 | 123506958 |
| chr18        | 77337635 | 77338335 | chr7 | 123507107 | 123507207 |
| chr18        | 77456880 | 77457180 | chr7 | 123989117 | 123989566 |
| chr18        | 77457729 | 77458380 | chr7 | 124247742 | 124247942 |
| chr18        | 77460780 | 77460929 | chr7 | 124276924 | 124277224 |
| chr18        | 77988361 | 77988561 | chr7 | 124277773 | 124277873 |
| chr18        | 78042982 | 78043131 | chr7 | 124457501 | 124457650 |
| chr18        | 78070845 | 78070945 | chr7 | 124513903 | 124514203 |
| chr18        | 79317838 | 79317938 | chr7 | 124617537 | 124617837 |
| chr18        | 79319095 | 79319287 | chr7 | 125123847 | 125123996 |
| chr18        | 80278273 | 80278373 | chr7 | 125340072 | 125340172 |
| chr18        | 80431538 | 80431638 | chr7 | 125358332 | 125358532 |
| chr18        | 80431887 | 80431987 | chr7 | 125579109 | 125579614 |
| chr18        | 80433066 | 80433315 | chr7 | 126654936 | 126655236 |
| chr18        | 80438017 | 80438117 | chr7 | 126721783 | 126721934 |
| chr18        | 80939999 | 80940099 | chr7 | 126923584 | 126923684 |
| chr18        | 81219251 | 81219351 | chr7 | 127174771 | 127174871 |
| chr18        | 82678327 | 82678978 | chr7 | 127449540 | 127449740 |
| chr18        | 84618160 | 84618867 | chr7 | 127703178 | 127703578 |
| chr18        | 84923732 | 84924781 | chr7 | 127864818 | 127864918 |
| chr18        | 86915787 | 86916187 | chr7 | 127865567 | 127865767 |
| chr18        | 86917838 | 86918087 | chr7 | 128009340 | 128009440 |
| chr18        | 89098747 | 89099147 | chr7 | 128262143 | 128262243 |
| chr13_random | 67231    | 67280    | chr7 | 128771479 | 128771928 |
| chr13_random | 131823   | 131923   | chr7 | 128910660 | 128910760 |
| chr7         | 3928801  | 3928950  | chr7 | 129058452 | 129058901 |
| chr7         | 3929201  | 3929450  | chr7 | 129286790 | 129287190 |
| chr7         | 3934369  | 3934918  | chr7 | 130829763 | 130829863 |

|      |          |          |      |           |           |
|------|----------|----------|------|-----------|-----------|
| chr7 | 3936469  | 3936618  | chr7 | 131000388 | 131000488 |
| chr7 | 3965557  | 3966007  | chr7 | 133080466 | 133080715 |
| chr7 | 3966158  | 3966307  | chr7 | 133129326 | 133129575 |
| chr7 | 4419902  | 4420151  | chr7 | 133201467 | 133201767 |
| chr7 | 4451089  | 4451389  | chr7 | 133490735 | 133490984 |
| chr7 | 4815992  | 4816444  | chr7 | 134216345 | 134216494 |
| chr7 | 4832059  | 4832108  | chr7 | 134289909 | 134290009 |
| chr7 | 4846833  | 4847433  | chr7 | 134699877 | 134700026 |
| chr7 | 4930199  | 4930749  | chr7 | 134823663 | 134823963 |
| chr7 | 4960567  | 4960816  | chr7 | 135130986 | 135131086 |
| chr7 | 4990544  | 4991044  | chr7 | 135413596 | 135413696 |
| chr7 | 4991399  | 4991499  | chr7 | 135529624 | 135530573 |
| chr7 | 5055022  | 5055071  | chr7 | 135570510 | 135570959 |
| chr7 | 5070919  | 5071019  | chr7 | 136230337 | 136230388 |
| chr7 | 5078048  | 5079103  | chr7 | 136477170 | 136477827 |
| chr7 | 5091967  | 5092716  | chr7 | 136562777 | 136562877 |
| chr7 | 5112706  | 5112806  | chr7 | 136599328 | 136599688 |
| chr7 | 5165796  | 5165896  | chr7 | 136628651 | 136628751 |
| chr7 | 5167047  | 5167149  | chr7 | 136655072 | 136655272 |
| chr7 | 5217444  | 5218292  | chr7 | 136681804 | 136681904 |
| chr7 | 5221880  | 5222080  | chr7 | 136784176 | 136784476 |
| chr7 | 5295106  | 5295206  | chr7 | 137167253 | 137167402 |
| chr7 | 5296357  | 5296506  | chr7 | 137874161 | 137874310 |
| chr7 | 5297157  | 5297306  | chr7 | 140204791 | 140205291 |
| chr7 | 5314724  | 5316174  | chr7 | 140697519 | 140697619 |
| chr7 | 5356813  | 5357013  | chr7 | 140924393 | 140924693 |
| chr7 | 5366146  | 5366346  | chr7 | 140925293 | 140925593 |
| chr7 | 5367195  | 5367746  | chr7 | 140969914 | 140970214 |
| chr7 | 5427472  | 5427721  | chr7 | 140984585 | 140984685 |
| chr7 | 5427872  | 5428021  | chr7 | 141000405 | 141000605 |
| chr7 | 6472373  | 6473222  | chr7 | 141174011 | 141174160 |
| chr7 | 6499621  | 6499770  | chr7 | 141201557 | 141201957 |
| chr7 | 6522330  | 6522679  | chr7 | 141273677 | 141273777 |
| chr7 | 6631313  | 6631410  | chr7 | 141273928 | 141274377 |
| chr7 | 6663939  | 6664139  | chr7 | 141296937 | 141297191 |
| chr7 | 6664288  | 6664588  | chr7 | 141446866 | 141447466 |
| chr7 | 6741337  | 6741686  | chr7 | 141511048 | 141511248 |
| chr7 | 6816812  | 6817012  | chr7 | 141514915 | 141515216 |
| chr7 | 6997268  | 6998126  | chr7 | 141635120 | 141635171 |
| chr7 | 7510990  | 7511439  | chr7 | 141693654 | 141693903 |
| chr7 | 7579920  | 7580035  | chr7 | 141704822 | 141705022 |
| chr7 | 7601083  | 7601783  | chr7 | 141729508 | 141729957 |
| chr7 | 15192803 | 15193003 | chr7 | 141739479 | 141739830 |

|      |          |          |      |           |           |
|------|----------|----------|------|-----------|-----------|
| chr7 | 15197082 | 15197582 | chr7 | 141757621 | 141757870 |
| chr7 | 15234481 | 15234981 | chr7 | 141843018 | 141843218 |
| chr7 | 15294578 | 15294678 | chr7 | 141890222 | 141890522 |
| chr7 | 15305362 | 15305962 | chr7 | 141945624 | 141945824 |
| chr7 | 15306511 | 15306811 | chr7 | 141967767 | 141968716 |
| chr7 | 15308096 | 15308296 | chr7 | 142085237 | 142085586 |
| chr7 | 15308545 | 15308745 | chr7 | 142205769 | 142205869 |
| chr7 | 15325083 | 15326138 | chr7 | 142222870 | 142222970 |
| chr7 | 15547300 | 15547400 | chr7 | 142242828 | 142243328 |
| chr7 | 15549000 | 15549200 | chr7 | 142266047 | 142266347 |
| chr7 | 15549549 | 15549849 | chr7 | 142266398 | 142267047 |
| chr7 | 16670183 | 16671332 | chr7 | 142297622 | 142297971 |
| chr7 | 17557532 | 17558781 | chr7 | 142375254 | 142375409 |
| chr7 | 17934302 | 17934702 | chr7 | 142393523 | 142393820 |
| chr7 | 17979211 | 17979311 | chr7 | 142426448 | 142426548 |
| chr7 | 17979660 | 17979760 | chr7 | 142463948 | 142464148 |
| chr7 | 18296435 | 18296984 | chr7 | 142478332 | 142478532 |
| chr7 | 18297635 | 18298035 | chr7 | 142669141 | 142669700 |
| chr7 | 18321813 | 18322162 | chr7 | 142703069 | 142703381 |
| chr7 | 18413580 | 18413880 | chr7 | 142794557 | 142794906 |
| chr7 | 18487913 | 18488164 | chr7 | 142915275 | 142915375 |
| chr7 | 18488613 | 18488964 | chr7 | 142958114 | 142958514 |
| chr7 | 18828464 | 18828564 | chr7 | 143020269 | 143020369 |
| chr7 | 18828813 | 18829213 | chr7 | 143107845 | 143108145 |
| chr7 | 18917687 | 18918287 | chr7 | 144763094 | 144763194 |
| chr7 | 18918836 | 18918987 | chr7 | 145016542 | 145017593 |
| chr7 | 19039895 | 19040095 | chr7 | 145018142 | 145018742 |
| chr7 | 20937146 | 20937795 | chr7 | 145859501 | 145859552 |
| chr7 | 21086975 | 21087124 | chr7 | 145859801 | 145861052 |
| chr7 | 21094970 | 21095770 | chr7 | 145867699 | 145867948 |
| chr7 | 21105368 | 21105568 | chr7 | 146039116 | 146039216 |
| chr7 | 21160213 | 21160362 | chr7 | 146055444 | 146055698 |
| chr7 | 22248387 | 22248836 | chr7 | 146057272 | 146057621 |
| chr7 | 22196913 | 22197213 | chr7 | 146843466 | 146843566 |
| chr7 | 22119300 | 22119400 | chr7 | 147125599 | 147125748 |
| chr7 | 22099783 | 22100032 | chr7 | 147339258 | 147339458 |
| chr7 | 22031019 | 22031219 | chr7 | 148163667 | 148163967 |
| chr7 | 22005413 | 22005613 | chr7 | 148302452 | 148302552 |
| chr7 | 22004964 | 22005264 | chr7 | 149239233 | 149239333 |
| chr7 | 21930015 | 21930315 | chr7 | 149978664 | 149978864 |
| chr7 | 21926483 | 21926991 | chr7 | 150105921 | 150106021 |
| chr7 | 21914832 | 21915834 | chr7 | 151517665 | 151517765 |
| chr7 | 21859287 | 21859387 | chr7 | 152005845 | 152005945 |

|      |          |          |      |          |          |
|------|----------|----------|------|----------|----------|
| chr7 | 21811298 | 21811447 | chr6 | 4853119  | 4853319  |
| chr7 | 21747120 | 21747220 | chr6 | 5143624  | 5143924  |
| chr7 | 21746671 | 21746771 | chr6 | 5675407  | 5675607  |
| chr7 | 21720342 | 21720691 | chr6 | 6831568  | 6831917  |
| chr7 | 26130214 | 26130314 | chr6 | 7643131  | 7643331  |
| chr7 | 26229740 | 26230292 | chr6 | 7794232  | 7794746  |
| chr7 | 26230943 | 26231343 | chr6 | 8209159  | 8209459  |
| chr7 | 26231492 | 26231792 | chr6 | 8727595  | 8727795  |
| chr7 | 26306760 | 26307109 | chr6 | 11876185 | 11876334 |
| chr7 | 26341476 | 26343276 | chr6 | 13557563 | 13557663 |
| chr7 | 26343725 | 26343825 | chr6 | 13628015 | 13628215 |
| chr7 | 26367064 | 26368469 | chr6 | 15670411 | 15670611 |
| chr7 | 26408766 | 26409019 | chr6 | 17014899 | 17015299 |
| chr7 | 26447969 | 26449220 | chr6 | 17230040 | 17230140 |
| chr7 | 26497547 | 26497647 | chr6 | 17587446 | 17587546 |
| chr7 | 26498196 | 26498296 | chr6 | 17698328 | 17698585 |
| chr7 | 26730437 | 26731337 | chr6 | 18464874 | 18464974 |
| chr7 | 26731786 | 26731886 | chr6 | 18798933 | 18799082 |
| chr7 | 26743991 | 26744740 | chr6 | 18815530 | 18815730 |
| chr7 | 26757988 | 26758388 | chr6 | 21164907 | 21165007 |
| chr7 | 26759037 | 26759237 | chr6 | 21899844 | 21900093 |
| chr7 | 26764245 | 26764345 | chr6 | 22305580 | 22305680 |
| chr7 | 26834834 | 26835483 | chr6 | 23789584 | 23789684 |
| chr7 | 26933076 | 26933706 | chr6 | 24547360 | 24547460 |
| chr7 | 26934173 | 26934273 | chr6 | 24615113 | 24615313 |
| chr7 | 26993438 | 26993887 | chr6 | 24907582 | 24907731 |
| chr7 | 26995187 | 26995387 | chr6 | 28377996 | 28378345 |
| chr7 | 27012134 | 27013583 | chr6 | 28430137 | 28430237 |
| chr7 | 27111443 | 27111743 | chr6 | 29104930 | 29105030 |
| chr7 | 27111892 | 27112392 | chr6 | 29298183 | 29298283 |
| chr7 | 27143287 | 27143387 | chr6 | 29475822 | 29476322 |
| chr7 | 27167605 | 27167654 | chr6 | 29643972 | 29644172 |
| chr7 | 27236100 | 27236400 | chr6 | 29685703 | 29685852 |
| chr7 | 27236954 | 27237155 | chr6 | 29718222 | 29718322 |
| chr7 | 27251184 | 27251884 | chr6 | 29867302 | 29867451 |
| chr7 | 27257614 | 27258065 | chr6 | 29997597 | 29997797 |
| chr7 | 27477591 | 27479435 | chr6 | 30490231 | 30490386 |
| chr7 | 27488701 | 27489350 | chr6 | 30866097 | 30866746 |
| chr7 | 27536193 | 27536293 | chr6 | 31368508 | 31368608 |
| chr7 | 27537454 | 27537554 | chr6 | 32558083 | 32558283 |
| chr7 | 27624284 | 27625484 | chr6 | 34750522 | 34750671 |
| chr7 | 27650930 | 27651530 | chr6 | 34832393 | 34832642 |
| chr7 | 27677508 | 27677808 | chr6 | 34849169 | 34849420 |

|      |          |          |      |          |          |
|------|----------|----------|------|----------|----------|
| chr7 | 27677957 | 27678657 | chr6 | 34880528 | 34880828 |
| chr7 | 28168669 | 28168769 | chr6 | 35103063 | 35103512 |
| chr7 | 28696518 | 28696618 | chr6 | 37499711 | 37499960 |
| chr7 | 29028332 | 29028432 | chr6 | 38094466 | 38094666 |
| chr7 | 29029683 | 29030132 | chr6 | 38324495 | 38325044 |
| chr7 | 29041261 | 29041661 | chr6 | 38403941 | 38404041 |
| chr7 | 29094166 | 29094470 | chr6 | 38504952 | 38505701 |
| chr7 | 29199670 | 29199870 | chr6 | 38521426 | 38521526 |
| chr7 | 29200026 | 29200070 | chr6 | 39390726 | 39390826 |
| chr7 | 29200519 | 29200821 | chr6 | 39528774 | 39528874 |
| chr7 | 29307655 | 29308004 | chr6 | 39544367 | 39544467 |
| chr7 | 29348245 | 29348545 | chr6 | 39782484 | 39782687 |
| chr7 | 29534938 | 29535038 | chr6 | 40295785 | 40296034 |
| chr7 | 29720002 | 29720453 | chr6 | 40413655 | 40413755 |
| chr7 | 30039210 | 30039710 | chr6 | 40911397 | 40911705 |
| chr7 | 30211927 | 30212227 | chr6 | 41575494 | 41575594 |
| chr7 | 30233904 | 30234055 | chr6 | 41576143 | 41576243 |
| chr7 | 30252273 | 30252524 | chr6 | 42234178 | 42234278 |
| chr7 | 30297224 | 30297324 | chr6 | 42235229 | 42235329 |
| chr7 | 30401162 | 30401311 | chr6 | 42319972 | 42320072 |
| chr7 | 30458924 | 30459024 | chr6 | 43280605 | 43280702 |
| chr7 | 30492142 | 30492442 | chr6 | 47566932 | 47567086 |
| chr7 | 30553926 | 30554026 | chr6 | 47800417 | 47800917 |
| chr7 | 30576350 | 30576699 | chr6 | 47891210 | 47891559 |
| chr7 | 30627460 | 30627609 | chr6 | 48563751 | 48563951 |
| chr7 | 30628560 | 30629160 | chr6 | 48598095 | 48598195 |
| chr7 | 30649103 | 30649504 | chr6 | 48598246 | 48598595 |
| chr7 | 30672098 | 30672298 | chr6 | 49186266 | 49186717 |
| chr7 | 30693267 | 30693716 | chr6 | 49289664 | 49290213 |
| chr7 | 30695110 | 30695410 | chr6 | 49365515 | 49365715 |
| chr7 | 30695659 | 30695859 | chr6 | 49792840 | 49792940 |
| chr7 | 30725263 | 30725563 | chr6 | 49793089 | 49793240 |
| chr7 | 30725912 | 30726063 | chr6 | 50080188 | 50080488 |
| chr7 | 30741690 | 30742641 | chr6 | 50536686 | 50536886 |
| chr7 | 30743290 | 30743390 | chr6 | 50537135 | 50537335 |
| chr7 | 31017510 | 31017710 | chr6 | 51403184 | 51403284 |
| chr7 | 31030426 | 31030575 | chr6 | 51439574 | 51439774 |
| chr7 | 31148697 | 31149346 | chr6 | 51441323 | 51441523 |
| chr7 | 31150497 | 31150597 | chr6 | 52129181 | 52129281 |
| chr7 | 31397493 | 31397693 | chr6 | 52146361 | 52146462 |
| chr7 | 31421941 | 31422245 | chr6 | 52162467 | 52162867 |
| chr7 | 31438858 | 31439115 | chr6 | 52172557 | 52172791 |
| chr7 | 31440260 | 31440509 | chr6 | 52190288 | 52190588 |

|      |          |          |      |          |          |
|------|----------|----------|------|----------|----------|
| chr7 | 31587774 | 31587874 | chr6 | 52190737 | 52190950 |
| chr7 | 31645742 | 31646142 | chr6 | 52205303 | 52205403 |
| chr7 | 31912274 | 31912423 | chr6 | 52216682 | 52216831 |
| chr7 | 31913574 | 31914023 | chr6 | 52682357 | 52682506 |
| chr7 | 32093881 | 32094281 | chr6 | 54241530 | 54241630 |
| chr7 | 32176255 | 32176555 | chr6 | 54241987 | 54242430 |
| chr7 | 32224150 | 32224299 | chr6 | 54400380 | 54400580 |
| chr7 | 32280924 | 32281273 | chr6 | 54942323 | 54942423 |
| chr7 | 32306788 | 32306888 | chr6 | 54942872 | 54943277 |
| chr7 | 32321196 | 32321696 | chr6 | 54963277 | 54963426 |
| chr7 | 32321845 | 32321945 | chr6 | 55008329 | 55008878 |
| chr7 | 32354235 | 32355035 | chr6 | 55306841 | 55306941 |
| chr7 | 32355284 | 32355384 | chr6 | 55422289 | 55422589 |
| chr7 | 32395787 | 32395887 | chr6 | 56802490 | 56802590 |
| chr7 | 32414279 | 32414579 | chr6 | 57662429 | 57663054 |
| chr7 | 32425131 | 32425631 | chr6 | 63226433 | 63226682 |
| chr7 | 32426680 | 32427531 | chr6 | 64699367 | 64699567 |
| chr7 | 32449495 | 32449595 | chr6 | 64699716 | 64699916 |
| chr7 | 32474561 | 32474961 | chr6 | 65013276 | 65013525 |
| chr7 | 32600334 | 32600783 | chr6 | 65642169 | 65642369 |
| chr7 | 32611409 | 32613258 | chr6 | 65749248 | 65749348 |
| chr7 | 32623840 | 32623989 | chr6 | 65749797 | 65749897 |
| chr7 | 32624240 | 32624640 | chr6 | 66866166 | 66866666 |
| chr7 | 32635779 | 32636032 | chr6 | 67007317 | 67007766 |
| chr7 | 32647182 | 32648533 | chr6 | 67505906 | 67506355 |
| chr7 | 32684553 | 32684653 | chr6 | 71232613 | 71232913 |
| chr7 | 32718056 | 32718505 | chr6 | 71242378 | 71242578 |
| chr7 | 32723297 | 32723697 | chr6 | 71293090 | 71293239 |
| chr7 | 32723848 | 32724208 | chr6 | 71293490 | 71293740 |
| chr7 | 32741994 | 32742094 | chr6 | 71604348 | 71604799 |
| chr7 | 32806827 | 32807176 | chr6 | 71677638 | 71678138 |
| chr7 | 32818709 | 32819060 | chr6 | 72206105 | 72206709 |
| chr7 | 32833982 | 32834082 | chr6 | 72315154 | 72315554 |
| chr7 | 32835131 | 32835883 | chr6 | 72315807 | 72315903 |
| chr7 | 32836239 | 32836732 | chr6 | 72325761 | 72325961 |
| chr7 | 32838432 | 32838483 | chr6 | 72326210 | 72326310 |
| chr7 | 32914084 | 32914684 | chr6 | 72513715 | 72513815 |
| chr7 | 32915912 | 32916212 | chr6 | 72759789 | 72759889 |
| chr7 | 32937450 | 32937550 | chr6 | 72928211 | 72928311 |
| chr7 | 32938199 | 32939099 | chr6 | 73441246 | 73441898 |
| chr7 | 32989623 | 32990072 | chr6 | 81857998 | 81858447 |
| chr7 | 36092940 | 36093389 | chr6 | 82873780 | 82873980 |
| chr7 | 36514824 | 36515124 | chr6 | 82966553 | 82966753 |



|      |          |          |      |          |          |
|------|----------|----------|------|----------|----------|
| chr7 | 36673454 | 36673554 | chr6 | 82968102 | 82968302 |
| chr7 | 37179218 | 37179367 | chr6 | 82989306 | 82989606 |
| chr7 | 37399921 | 37400809 | chr6 | 83056302 | 83056502 |
| chr7 | 37417074 | 37417174 | chr6 | 83070767 | 83071367 |
| chr7 | 37615376 | 37615925 | chr6 | 83260384 | 83260833 |
| chr7 | 56036998 | 56037298 | chr6 | 83283813 | 83284262 |
| chr7 | 56037449 | 56037847 | chr6 | 83644893 | 83645093 |
| chr7 | 56310446 | 56310546 | chr6 | 85061273 | 85061324 |
| chr7 | 57820123 | 57820323 | chr6 | 85267249 | 85267298 |
| chr7 | 58071070 | 58071470 | chr6 | 85436824 | 85437073 |
| chr7 | 58085312 | 58086012 | chr6 | 85437124 | 85437573 |
| chr7 | 58149408 | 58149513 | chr6 | 85521673 | 85522073 |
| chr7 | 58247945 | 58248803 | chr6 | 85838738 | 85838838 |
| chr7 | 58249648 | 58249797 | chr6 | 85839087 | 85839187 |
| chr7 | 58249948 | 58250297 | chr6 | 85850359 | 85850459 |
| chr7 | 58423582 | 58423882 | chr6 | 86128987 | 86129287 |
| chr7 | 58434381 | 58434481 | chr6 | 86338469 | 86338569 |
| chr7 | 58438397 | 58438746 | chr6 | 86461470 | 86461570 |
| chr7 | 58467270 | 58467419 | chr6 | 86602908 | 86603108 |
| chr7 | 58468170 | 58468319 | chr6 | 86667657 | 86667857 |
| chr7 | 58522092 | 58522741 | chr6 | 87745401 | 87745501 |
| chr7 | 58522892 | 58523441 | chr6 | 87785491 | 87785591 |
| chr7 | 58523792 | 58523941 | chr6 | 87848227 | 87848327 |
| chr7 | 58586232 | 58586781 | chr6 | 88131763 | 88131863 |
| chr7 | 58829083 | 58829233 | chr6 | 88453196 | 88453396 |
| chr7 | 59027141 | 59027490 | chr6 | 88561392 | 88561492 |
| chr7 | 59085256 | 59085556 | chr6 | 88561741 | 88561992 |
| chr7 | 59106555 | 59107304 | chr6 | 88562141 | 88562444 |
| chr7 | 59108976 | 59109476 | chr6 | 88659423 | 88659623 |
| chr7 | 59110725 | 59110925 | chr6 | 88809540 | 88809740 |
| chr7 | 59174492 | 59175092 | chr6 | 88835255 | 88835455 |
| chr7 | 59175241 | 59175592 | chr6 | 88835605 | 88836904 |
| chr7 | 59233340 | 59233640 | chr6 | 89030778 | 89030878 |
| chr7 | 59389849 | 59390098 | chr6 | 89075451 | 89075804 |
| chr7 | 59458040 | 59458840 | chr6 | 89578244 | 89578344 |
| chr7 | 59491394 | 59492043 | chr6 | 90362871 | 90363220 |
| chr7 | 59492694 | 59493043 | chr6 | 90538112 | 90539163 |
| chr7 | 59498124 | 59498673 | chr6 | 91051427 | 91051627 |
| chr7 | 59534688 | 59534937 | chr6 | 91450349 | 91450498 |
| chr7 | 59571689 | 59571789 | chr6 | 91617778 | 91617878 |
| chr7 | 59571938 | 59572089 | chr6 | 91697931 | 91698131 |
| chr7 | 59572338 | 59572438 | chr6 | 94218196 | 94218296 |
| chr7 | 59585720 | 59586120 | chr6 | 95052394 | 95052545 |

|      |          |          |      |           |           |
|------|----------|----------|------|-----------|-----------|
| chr7 | 59638780 | 59639329 | chr6 | 95052694  | 95052794  |
| chr7 | 59734384 | 59735133 | chr6 | 95653262  | 95653569  |
| chr7 | 59745413 | 59745562 | chr6 | 96100981  | 96101094  |
| chr7 | 59746513 | 59747162 | chr6 | 96995036  | 96995436  |
| chr7 | 59768503 | 59768603 | chr6 | 97083108  | 97083208  |
| chr7 | 59768755 | 59769052 | chr6 | 97139768  | 97139868  |
| chr7 | 59771556 | 59771805 | chr6 | 97140217  | 97140317  |
| chr7 | 59780255 | 59780355 | chr6 | 97145016  | 97145665  |
| chr7 | 59799089 | 59799197 | chr6 | 97552155  | 97552455  |
| chr7 | 59823502 | 59824002 | chr6 | 99601245  | 99601445  |
| chr7 | 59849162 | 59849562 | chr6 | 99626203  | 99626603  |
| chr7 | 59858590 | 59858839 | chr6 | 100223032 | 100223132 |
| chr7 | 59881461 | 59881610 | chr6 | 100604680 | 100604780 |
| chr7 | 59976063 | 59976712 | chr6 | 100638923 | 100639072 |
| chr7 | 60008553 | 60008653 | chr6 | 100767328 | 100767528 |
| chr7 | 60010002 | 60010953 | chr6 | 108119267 | 108119816 |
| chr7 | 60013234 | 60013334 | chr6 | 108594994 | 108595294 |
| chr7 | 60014585 | 60015085 | chr6 | 108762578 | 108762678 |
| chr7 | 60061866 | 60062015 | chr6 | 110579808 | 110580008 |
| chr7 | 60109043 | 60109492 | chr6 | 112630905 | 112631457 |
| chr7 | 60132117 | 60132217 | chr6 | 113011698 | 113011998 |
| chr7 | 60132366 | 60132766 | chr6 | 113215117 | 113215217 |
| chr7 | 60159522 | 60159964 | chr6 | 113215666 | 113216617 |
| chr7 | 60258660 | 60259511 | chr6 | 113260970 | 113261470 |
| chr7 | 60262531 | 60262631 | chr6 | 113277982 | 113278282 |
| chr7 | 60264431 | 60264885 | chr6 | 113311923 | 113312023 |
| chr7 | 60268606 | 60269557 | chr6 | 113312172 | 113312472 |
| chr7 | 60322528 | 60322731 | chr6 | 113376445 | 113376745 |
| chr7 | 60326734 | 60327583 | chr6 | 113403984 | 113404433 |
| chr7 | 60341187 | 60341636 | chr6 | 113417328 | 113417428 |
| chr7 | 60342487 | 60342687 | chr6 | 113436029 | 113436129 |
| chr7 | 60345952 | 60346152 | chr6 | 113436278 | 113436378 |
| chr7 | 60357428 | 60357777 | chr6 | 113538582 | 113538982 |
| chr7 | 60364094 | 60364194 | chr6 | 114215166 | 114215866 |
| chr7 | 60402143 | 60402343 | chr6 | 115069118 | 115069318 |
| chr7 | 60403143 | 60404103 | chr6 | 115536054 | 115536203 |
| chr7 | 60427000 | 60428200 | chr6 | 115610520 | 115610720 |
| chr7 | 60466968 | 60467368 | chr6 | 115610969 | 115611169 |
| chr7 | 60467617 | 60468017 | chr6 | 115708991 | 115709091 |
| chr7 | 60474897 | 60475097 | chr6 | 115877355 | 115877804 |
| chr7 | 60509237 | 60510088 | chr6 | 116271939 | 116272439 |
| chr7 | 60510437 | 60511237 | chr6 | 116607908 | 116608457 |
| chr7 | 60515860 | 60516009 | chr6 | 116650775 | 116651275 |

|      |          |          |      |           |           |
|------|----------|----------|------|-----------|-----------|
| chr7 | 60538595 | 60538795 | chr6 | 116652233 | 116652524 |
| chr7 | 60676406 | 60676606 | chr6 | 117103121 | 117103370 |
| chr7 | 60676855 | 60676955 | chr6 | 117796593 | 117796748 |
| chr7 | 60880711 | 60880911 | chr6 | 117841033 | 117841133 |
| chr7 | 60881060 | 60881660 | chr6 | 118073557 | 118073706 |
| chr7 | 60883611 | 60883711 | chr6 | 118353734 | 118353834 |
| chr7 | 61018202 | 61018351 | chr6 | 118354083 | 118354183 |
| chr7 | 61018951 | 61019102 | chr6 | 118413575 | 118413724 |
| chr7 | 61282160 | 61282660 | chr6 | 119042471 | 119042571 |
| chr7 | 61385201 | 61385350 | chr6 | 119044520 | 119044726 |
| chr7 | 61392553 | 61392653 | chr6 | 119109419 | 119109719 |
| chr7 | 61393114 | 61393302 | chr6 | 119171191 | 119171291 |
| chr7 | 61394853 | 61395002 | chr6 | 119782802 | 119783002 |
| chr7 | 61489782 | 61490182 | chr6 | 120028116 | 120028215 |
| chr7 | 61502283 | 61502383 | chr6 | 120397651 | 120397851 |
| chr7 | 61601048 | 61601197 | chr6 | 120465765 | 120465865 |
| chr7 | 61691660 | 61691809 | chr6 | 120770446 | 120770746 |
| chr7 | 61776005 | 61776654 | chr6 | 120770895 | 120771095 |
| chr7 | 61831576 | 61831725 | chr6 | 121233712 | 121234269 |
| chr7 | 62198456 | 62198905 | chr6 | 121280613 | 121281062 |
| chr7 | 63431723 | 63432172 | chr6 | 121281413 | 121281462 |
| chr7 | 63487972 | 63488321 | chr6 | 122270914 | 122271214 |
| chr7 | 63523817 | 63523917 | chr6 | 122676436 | 122676885 |
| chr7 | 64005541 | 64005641 | chr6 | 122755076 | 122755276 |
| chr7 | 64007641 | 64007890 | chr6 | 124349737 | 124349837 |
| chr7 | 64400573 | 64400722 | chr6 | 124399241 | 124399341 |
| chr7 | 64618334 | 64618534 | chr6 | 124596678 | 124597078 |
| chr7 | 69356550 | 69356899 | chr6 | 124713784 | 124713884 |
| chr7 | 70313653 | 70313953 | chr6 | 124792704 | 124792804 |
| chr7 | 70315681 | 70315830 | chr6 | 124798183 | 124798283 |
| chr7 | 70483585 | 70483785 | chr6 | 124865622 | 124865722 |
| chr7 | 70540379 | 70540479 | chr6 | 124929885 | 124929985 |
| chr7 | 70540828 | 70540928 | chr6 | 124931136 | 124931236 |
| chr7 | 72111969 | 72112169 | chr6 | 124943321 | 124943626 |
| chr7 | 74415875 | 74415975 | chr6 | 125029179 | 125029579 |
| chr7 | 76835898 | 76836198 | chr6 | 125065867 | 125066216 |
| chr7 | 76880618 | 76880818 | chr6 | 125248920 | 125249071 |
| chr7 | 80060972 | 80061172 | chr6 | 125249320 | 125249520 |
| chr7 | 80106478 | 80106778 | chr6 | 125283071 | 125283220 |
| chr7 | 80110029 | 80110178 | chr6 | 125314970 | 125315070 |
| chr7 | 80804449 | 80804749 | chr6 | 125315321 | 125315470 |
| chr7 | 81095049 | 81095149 | chr6 | 125430485 | 125430985 |
| chr7 | 81639069 | 81639218 | chr6 | 126469329 | 126469878 |

|      |           |           |      |           |           |
|------|-----------|-----------|------|-----------|-----------|
| chr7 | 82176001  | 82176301  | chr6 | 126578713 | 126579013 |
| chr7 | 82715391  | 82716091  | chr6 | 126674419 | 126675219 |
| chr7 | 84776452  | 84778064  | chr6 | 126873498 | 126873847 |
| chr7 | 87789919  | 87790014  | chr6 | 127006290 | 127006639 |
| chr7 | 93470966  | 93471466  | chr6 | 127386239 | 127386591 |
| chr7 | 93690149  | 93691000  | chr6 | 128206889 | 128207438 |
| chr7 | 93802620  | 93802776  | chr6 | 128289711 | 128290111 |
| chr7 | 93803720  | 93803820  | chr6 | 128290460 | 128290560 |
| chr7 | 93807987  | 93808487  | chr6 | 128291311 | 128291411 |
| chr7 | 94035432  | 94035632  | chr6 | 129331439 | 129331788 |
| chr7 | 94149306  | 94149555  | chr6 | 131322842 | 131322942 |
| chr7 | 94228261  | 94228361  | chr6 | 133970398 | 133970498 |
| chr7 | 94261268  | 94261868  | chr6 | 134566331 | 134566431 |
| chr7 | 94352499  | 94352648  | chr6 | 134568131 | 134568380 |
| chr7 | 94442168  | 94442568  | chr6 | 134726310 | 134726410 |
| chr7 | 94443775  | 94443975  | chr6 | 134727159 | 134727459 |
| chr7 | 94444224  | 94444324  | chr6 | 134854259 | 134854459 |
| chr7 | 94615959  | 94616059  | chr6 | 135054066 | 135054515 |
| chr7 | 94678054  | 94678354  | chr6 | 135102579 | 135102679 |
| chr7 | 94678803  | 94678903  | chr6 | 135132194 | 135132294 |
| chr7 | 95220814  | 95221263  | chr6 | 135244962 | 135245255 |
| chr7 | 95410803  | 95411003  | chr6 | 136595414 | 136595916 |
| chr7 | 95532302  | 95532602  | chr6 | 136760786 | 136761035 |
| chr7 | 95532951  | 95533251  | chr6 | 137185110 | 137185310 |
| chr7 | 95630041  | 95630641  | chr6 | 137581466 | 137581566 |
| chr7 | 95763367  | 95763467  | chr6 | 137667871 | 137668071 |
| chr7 | 95764318  | 95764567  | chr6 | 138591339 | 138591742 |
| chr7 | 95915985  | 95916034  | chr6 | 139775681 | 139775981 |
| chr7 | 95985448  | 95985706  | chr6 | 141183804 | 141184353 |
| chr7 | 96181157  | 96181606  | chr6 | 142643136 | 142643236 |
| chr7 | 96275327  | 96275527  | chr6 | 142643385 | 142643485 |
| chr7 | 96411299  | 96411399  | chr6 | 143052108 | 143052457 |
| chr7 | 96681123  | 96681472  | chr6 | 143183910 | 143184010 |
| chr7 | 98158375  | 98159275  | chr6 | 143185263 | 143185559 |
| chr7 | 98507930  | 98508279  | chr6 | 144150061 | 144150210 |
| chr7 | 98574277  | 98574578  | chr6 | 145061515 | 145061664 |
| chr7 | 98831287  | 98831387  | chr6 | 145150936 | 145151185 |
| chr7 | 99028130  | 99028630  | chr6 | 145191267 | 145191361 |
| chr7 | 103759924 | 103760373 | chr6 | 145554568 | 145555419 |
| chr7 | 103825321 | 103825621 | chr6 | 145874308 | 145874408 |
| chr7 | 103939180 | 103939480 | chr6 | 146442535 | 146442635 |
| chr7 | 104364313 | 104364662 | chr6 | 146517145 | 146517245 |
| chr7 | 104688588 | 104689037 | chr6 | 146517994 | 146518094 |

|      |           |           |      |           |           |
|------|-----------|-----------|------|-----------|-----------|
| chr7 | 104898123 | 104898272 | chr6 | 146581952 | 146582401 |
| chr7 | 107164350 | 107164550 | chr6 | 146664434 | 146664834 |
| chr7 | 107164699 | 107164999 | chr6 | 146743952 | 146744256 |
| chr7 | 107502855 | 107502955 | chr6 | 146745652 | 146745869 |
| chr7 | 111504453 | 111504653 | chr6 | 146970410 | 146970659 |
| chr7 | 111753829 | 111754278 | chr6 | 146972759 | 146972859 |
| chr7 | 111823390 | 111823739 | chr6 | 146982677 | 146982877 |
| chr7 | 111876806 | 111876955 | chr6 | 147026955 | 147027155 |
| chr7 | 112540437 | 112541137 | chr6 | 147204024 | 147204224 |
| chr7 | 112541937 | 112542086 | chr6 | 147414844 | 147415444 |
| chr7 | 112542437 | 112542586 | chr6 | 148384375 | 148384475 |
| chr7 | 112600896 | 112600996 | chr6 | 149249304 | 149249753 |
| chr7 | 112601245 | 112601296 | chr6 | 149349146 | 149349395 |
| chr7 | 112602945 | 112603045 | chr5 | 3537637   | 3538137   |
| chr7 | 112732779 | 112732979 | chr5 | 3590308   | 3590708   |
| chr7 | 112894435 | 112895184 | chr5 | 3648997   | 3649546   |
| chr7 | 112985693 | 112986143 | chr5 | 3797331   | 3797431   |
| chr7 | 113638988 | 113639088 | chr5 | 3921883   | 3921983   |
| chr7 | 113682791 | 113682941 | chr5 | 5374640   | 5374740   |
| chr7 | 113765773 | 113766122 | chr5 | 5743205   | 5743454   |
| chr7 | 113850971 | 113851071 | chr5 | 7953665   | 7954314   |
| chr7 | 113879523 | 113879723 | chr5 | 8361575   | 8362075   |
| chr7 | 114034060 | 114034160 | chr5 | 8362424   | 8362524   |
| chr7 | 114235991 | 114236440 | chr5 | 8416231   | 8416331   |
| chr7 | 114435126 | 114435277 | chr5 | 8416980   | 8417080   |
| chr7 | 114622396 | 114622496 | chr5 | 8653985   | 8654385   |
| chr7 | 114678043 | 114678343 | chr5 | 8792486   | 8792635   |
| chr7 | 114678900 | 114679092 | chr5 | 8887710   | 8887810   |
| chr7 | 114786266 | 114786466 | chr5 | 8991140   | 8991489   |
| chr7 | 114974185 | 114974285 | chr5 | 9719346   | 9719446   |
| chr7 | 115512342 | 115512842 | chr5 | 12377449  | 12377998  |
| chr7 | 115514142 | 115514491 | chr5 | 14508817  | 14508917  |
| chr7 | 115609163 | 115609263 | chr5 | 15433999  | 15434299  |
| chr7 | 115816569 | 115817627 | chr5 | 20385732  | 20386185  |
| chr7 | 115847119 | 115847375 | chr5 | 20556058  | 20556258  |
| chr7 | 115877172 | 115877721 | chr5 | 20686049  | 20686149  |
| chr7 | 115885877 | 115886426 | chr5 | 20872714  | 20872963  |
| chr7 | 115895287 | 115895487 | chr5 | 20925183  | 20925332  |
| chr7 | 115921808 | 115921908 | chr5 | 21145395  | 21145595  |
| chr7 | 116318340 | 116318889 | chr5 | 21285043  | 21285246  |
| chr7 | 116319040 | 116319140 | chr5 | 21365616  | 21365974  |
| chr7 | 116371292 | 116371483 | chr5 | 21844002  | 21844102  |
| chr7 | 116519106 | 116519255 | chr5 | 23283522  | 23283732  |

|      |           |           |      |          |          |
|------|-----------|-----------|------|----------|----------|
| chr7 | 116769023 | 116769123 | chr5 | 23289536 | 23289685 |
| chr7 | 116978768 | 116978868 | chr5 | 23602190 | 23602290 |
| chr7 | 117079047 | 117079347 | chr5 | 23666733 | 23666833 |
| chr7 | 117079596 | 117079647 | chr5 | 23949276 | 23949525 |
| chr7 | 117197490 | 117197639 | chr5 | 24057030 | 24057130 |
| chr7 | 117839206 | 117839356 | chr5 | 24079079 | 24079479 |
| chr7 | 117943721 | 117943921 | chr5 | 24103073 | 24103473 |
| chr7 | 118540944 | 118541093 | chr5 | 24215392 | 24215492 |
| chr7 | 118607439 | 118607588 | chr5 | 24344581 | 24345187 |
| chr7 | 118828792 | 118829041 | chr5 | 24601953 | 24602153 |
| chr7 | 119088901 | 119089050 | chr5 | 24602402 | 24602802 |
| chr7 | 119147652 | 119147852 | chr5 | 27371285 | 27371734 |
| chr7 | 119838061 | 119838510 | chr5 | 28113232 | 28113432 |
| chr7 | 119900558 | 119900658 | chr5 | 28164288 | 28164388 |
| chr7 | 119905265 | 119905463 | chr5 | 28393259 | 28393359 |
| chr7 | 120082031 | 120082131 | chr5 | 28487772 | 28487972 |
| chr7 | 120100743 | 120101192 | chr5 | 29756788 | 29757237 |
| chr7 | 121497205 | 121497354 | chr5 | 29800263 | 29800363 |
| chr7 | 122091401 | 122091600 | chr5 | 29800712 | 29800812 |
| chr7 | 123579103 | 123579303 | chr5 | 29891134 | 29891434 |
| chr7 | 123579756 | 123579857 | chr5 | 30057032 | 30057181 |
| chr7 | 124015075 | 124015275 | chr5 | 30058332 | 30058681 |
| chr7 | 124015424 | 124015524 | chr5 | 30794590 | 30794690 |
| chr7 | 124199415 | 124199515 | chr5 | 31040108 | 31040508 |
| chr7 | 124248591 | 124248691 | chr5 | 31197711 | 31197811 |
| chr7 | 124361782 | 124361882 | chr5 | 31297143 | 31297243 |
| chr7 | 124456350 | 124456450 | chr5 | 31435885 | 31436085 |
| chr7 | 124557234 | 124557688 | chr5 | 31508358 | 31508658 |
| chr7 | 125121547 | 125121947 | chr5 | 31521072 | 31521172 |
| chr7 | 125358581 | 125359081 | chr5 | 31523072 | 31523224 |
| chr7 | 125477940 | 125478389 | chr5 | 31529998 | 31530247 |
| chr7 | 125524899 | 125525348 | chr5 | 31531847 | 31532247 |
| chr7 | 126276408 | 126276908 | chr5 | 31578780 | 31578880 |
| chr7 | 126518884 | 126518984 | chr5 | 31623991 | 31624191 |
| chr7 | 126720434 | 126720634 | chr5 | 31779954 | 31780103 |
| chr7 | 126722083 | 126722183 | chr5 | 32026294 | 32026494 |
| chr7 | 128615210 | 128615310 | chr5 | 32787124 | 32787324 |
| chr7 | 128750309 | 128750509 | chr5 | 32938797 | 32938997 |
| chr7 | 129286641 | 129286741 | chr5 | 33379340 | 33379789 |
| chr7 | 130527927 | 130528376 | chr5 | 33470823 | 33471223 |
| chr7 | 130589469 | 130589618 | chr5 | 33472923 | 33473123 |
| chr7 | 131876795 | 131876995 | chr5 | 33586324 | 33586773 |
| chr7 | 132625443 | 132625692 | chr5 | 33643759 | 33643859 |

|      |           |           |      |          |          |
|------|-----------|-----------|------|----------|----------|
| chr7 | 132739937 | 132740788 | chr5 | 33703875 | 33703975 |
| chr7 | 132987910 | 132988010 | chr5 | 33997665 | 33997765 |
| chr7 | 134185969 | 134186427 | chr5 | 33998314 | 33998524 |
| chr7 | 134254902 | 134255251 | chr5 | 34021096 | 34021196 |
| chr7 | 134290358 | 134290558 | chr5 | 34025851 | 34026100 |
| chr7 | 134392320 | 134392924 | chr5 | 34090164 | 34090264 |
| chr7 | 134598213 | 134598662 | chr5 | 34351614 | 34351714 |
| chr7 | 134640670 | 134640819 | chr5 | 34364124 | 34364224 |
| chr7 | 134669555 | 134670106 | chr5 | 34556300 | 34556400 |
| chr7 | 134699577 | 134699826 | chr5 | 34657114 | 34657214 |
| chr7 | 134824612 | 134824912 | chr5 | 34657765 | 34658014 |
| chr7 | 135338762 | 135338862 | chr5 | 34704830 | 34704930 |
| chr7 | 135579217 | 135579466 | chr5 | 34892386 | 34892735 |
| chr7 | 136229488 | 136230188 | chr5 | 35005355 | 35005604 |
| chr7 | 136563626 | 136563726 | chr5 | 35028493 | 35029643 |
| chr7 | 136597428 | 136597777 | chr5 | 35425869 | 35425969 |
| chr7 | 137465798 | 137465998 | chr5 | 35756753 | 35756953 |
| chr7 | 137466347 | 137466447 | chr5 | 35893772 | 35894121 |
| chr7 | 137866211 | 137866511 | chr5 | 35943146 | 35943246 |
| chr7 | 137956591 | 137957100 | chr5 | 36047751 | 36048451 |
| chr7 | 139847426 | 139848483 | chr5 | 36259755 | 36259804 |
| chr7 | 139987889 | 139988538 | chr5 | 36765811 | 36765911 |
| chr7 | 139989089 | 139989189 | chr5 | 36766060 | 36766360 |
| chr7 | 140049292 | 140049441 | chr5 | 36851890 | 36851990 |
| chr7 | 140100431 | 140100780 | chr5 | 37242637 | 37242937 |
| chr7 | 140873965 | 140874114 | chr5 | 37324356 | 37324905 |
| chr7 | 140913090 | 140913639 | chr5 | 37483287 | 37483487 |
| chr7 | 140924742 | 140924942 | chr5 | 37830790 | 37830990 |
| chr7 | 140971665 | 140971814 | chr5 | 37832690 | 37833139 |
| chr7 | 141091364 | 141091914 | chr5 | 38318734 | 38318834 |
| chr7 | 141192586 | 141192935 | chr5 | 38812237 | 38812386 |
| chr7 | 141202608 | 141202757 | chr5 | 39056073 | 39056378 |
| chr7 | 141256834 | 141256934 | chr5 | 40249404 | 40249704 |
| chr7 | 141273528 | 141273628 | chr5 | 42202234 | 42202434 |
| chr7 | 141277444 | 141277794 | chr5 | 43727001 | 43727101 |
| chr7 | 141278244 | 141278793 | chr5 | 44008517 | 44008666 |
| chr7 | 141295637 | 141295737 | chr5 | 44597260 | 44597360 |
| chr7 | 141295986 | 141296686 | chr5 | 48477222 | 48477422 |
| chr7 | 141342406 | 141342555 | chr5 | 49005139 | 49005239 |
| chr7 | 141344208 | 141344408 | chr5 | 52684773 | 52685078 |
| chr7 | 141445865 | 141446717 | chr5 | 52870271 | 52870371 |
| chr7 | 141473302 | 141473451 | chr5 | 53060659 | 53060759 |
| chr7 | 141511497 | 141511952 | chr5 | 53163431 | 53163980 |

|      |           |           |      |          |          |
|------|-----------|-----------|------|----------|----------|
| chr7 | 141512101 | 141512601 | chr5 | 53235737 | 53236137 |
| chr7 | 141538974 | 141539123 | chr5 | 53707049 | 53707249 |
| chr7 | 141548331 | 141548480 | chr5 | 54084748 | 54084799 |
| chr7 | 141588238 | 141588638 | chr5 | 64472382 | 64472482 |
| chr7 | 141618383 | 141618583 | chr5 | 64663005 | 64663105 |
| chr7 | 141619432 | 141619641 | chr5 | 65305865 | 65306065 |
| chr7 | 141634471 | 141635071 | chr5 | 65473454 | 65473803 |
| chr7 | 141693954 | 141694103 | chr5 | 65634313 | 65634613 |
| chr7 | 141707250 | 141707399 | chr5 | 65635062 | 65635262 |
| chr7 | 141730108 | 141730257 | chr5 | 65838548 | 65838797 |
| chr7 | 141741025 | 141741125 | chr5 | 65851466 | 65851566 |
| chr7 | 141841668 | 141841968 | chr5 | 65940385 | 65940585 |
| chr7 | 141903176 | 141903525 | chr5 | 66040022 | 66040422 |
| chr7 | 141920076 | 141920325 | chr5 | 66654872 | 66655121 |
| chr7 | 142111487 | 142111587 | chr5 | 66763067 | 66763167 |
| chr7 | 142111936 | 142112236 | chr5 | 67123814 | 67123963 |
| chr7 | 142209021 | 142209470 | chr5 | 67179851 | 67180000 |
| chr7 | 142223119 | 142223170 | chr5 | 67248791 | 67248891 |
| chr7 | 142224019 | 142224419 | chr5 | 67810299 | 67810499 |
| chr7 | 142264898 | 142265098 | chr5 | 68110667 | 68110867 |
| chr7 | 142321193 | 142321293 | chr5 | 69844801 | 69845001 |
| chr7 | 142337661 | 142338561 | chr5 | 70060404 | 70060653 |
| chr7 | 142373703 | 142373803 | chr5 | 71598692 | 71598892 |
| chr7 | 142392171 | 142392620 | chr5 | 71599141 | 71599341 |
| chr7 | 142393271 | 142393371 | chr5 | 72051601 | 72052108 |
| chr7 | 142399829 | 142400278 | chr5 | 72706285 | 72706785 |
| chr7 | 142400929 | 142401278 | chr5 | 72706934 | 72707134 |
| chr7 | 142428506 | 142428904 | chr5 | 73007051 | 73007200 |
| chr7 | 142558559 | 142558810 | chr5 | 73062356 | 73062656 |
| chr7 | 142733110 | 142733310 | chr5 | 73062805 | 73062905 |
| chr7 | 142733859 | 142734059 | chr5 | 73090842 | 73090942 |
| chr7 | 142743824 | 142744073 | chr5 | 73240245 | 73240394 |
| chr7 | 142762250 | 142763001 | chr5 | 73371426 | 73371675 |
| chr7 | 143018924 | 143019025 | chr5 | 73510146 | 73510346 |
| chr7 | 143241734 | 143242283 | chr5 | 73574570 | 73574977 |
| chr7 | 145015993 | 145016093 | chr5 | 73794966 | 73795066 |
| chr7 | 145187709 | 145188009 | chr5 | 73909370 | 73909570 |
| chr7 | 145189709 | 145189858 | chr5 | 74135613 | 74135762 |
| chr7 | 145432682 | 145432982 | chr5 | 74135913 | 74136013 |
| chr7 | 145528029 | 145528178 | chr5 | 74136366 | 74136665 |
| chr7 | 145528629 | 145528980 | chr5 | 75041953 | 75042453 |
| chr7 | 145529229 | 145529378 | chr5 | 75045804 | 75046004 |
| chr7 | 145906954 | 145907054 | chr5 | 75189177 | 75189326 |



|      |           |           |      |           |           |
|------|-----------|-----------|------|-----------|-----------|
| chr7 | 145907603 | 145907703 | chr5 | 75189677  | 75189877  |
| chr7 | 146492721 | 146493170 | chr5 | 75459546  | 75459995  |
| chr7 | 146680950 | 146681050 | chr5 | 75555228  | 75555333  |
| chr7 | 147096000 | 147097400 | chr5 | 75586302  | 75586402  |
| chr7 | 147098249 | 147098354 | chr5 | 96012183  | 96012283  |
| chr7 | 147137138 | 147137292 | chr5 | 77191365  | 77191465  |
| chr7 | 147340007 | 147340107 | chr5 | 80804785  | 80804934  |
| chr7 | 147649559 | 147650510 | chr5 | 85850160  | 85850309  |
| chr7 | 148751308 | 148751508 | chr5 | 85980859  | 85980959  |
| chr7 | 149238584 | 149238684 | chr5 | 85981308  | 85981913  |
| chr6 | 3718116   | 3718316   | chr5 | 88337371  | 88337671  |
| chr6 | 3918056   | 3918205   | chr5 | 88460787  | 88460987  |
| chr6 | 4696512   | 4696912   | chr5 | 88461436  | 88461549  |
| chr6 | 4698161   | 4698612   | chr5 | 89310517  | 89310966  |
| chr6 | 4698961   | 4699061   | chr5 | 90006315  | 90006515  |
| chr6 | 5144573   | 5145573   | chr5 | 90006664  | 90006764  |
| chr6 | 5145624   | 5145773   | chr5 | 90423019  | 90423168  |
| chr6 | 5445778   | 5446227   | chr5 | 90567554  | 90567654  |
| chr6 | 6528092   | 6528541   | chr5 | 91866558  | 91866962  |
| chr6 | 7642782   | 7642882   | chr5 | 91920689  | 91920789  |
| chr6 | 7793332   | 7793484   | chr5 | 92094476  | 92094725  |
| chr6 | 14850989  | 14851189  | chr5 | 92146729  | 92147529  |
| chr6 | 17015448  | 17015548  | chr5 | 92466386  | 92466742  |
| chr6 | 17230489  | 17230989  | chr5 | 92828152  | 92828352  |
| chr6 | 17439240  | 17439489  | chr5 | 92989122  | 92989255  |
| chr6 | 18059604  | 18059713  | chr5 | 97411353  | 97411502  |
| chr6 | 18464325  | 18464425  | chr5 | 97614924  | 97615124  |
| chr6 | 18816479  | 18816779  | chr5 | 97728832  | 97729032  |
| chr6 | 24906430  | 24906631  | chr5 | 98649949  | 98650149  |
| chr6 | 28075685  | 28075934  | chr5 | 98869919  | 98870074  |
| chr6 | 28375990  | 28376139  | chr5 | 98871619  | 98871819  |
| chr6 | 28430586  | 28430786  | chr5 | 98947140  | 98947389  |
| chr6 | 29161761  | 29162210  | chr5 | 99656170  | 99656364  |
| chr6 | 29297834  | 29298134  | chr5 | 99870054  | 99870354  |
| chr6 | 29457776  | 29457827  | chr5 | 100596934 | 100597334 |
| chr6 | 29458076  | 29458476  | chr5 | 100777974 | 100778474 |
| chr6 | 29459027  | 29459176  | chr5 | 100778823 | 100779027 |
| chr6 | 29642345  | 29643006  | chr5 | 101136291 | 101136540 |
| chr6 | 29865502  | 29866251  | chr5 | 101337668 | 101337868 |
| chr6 | 29996297  | 29996446  | chr5 | 101415994 | 101416194 |
| chr6 | 30491131  | 30491784  | chr5 | 101438320 | 101438520 |
| chr6 | 30587210  | 30587410  | chr5 | 101463269 | 101463769 |
| chr6 | 30587559  | 30588130  | chr5 | 102688006 | 102688206 |

|      |          |          |      |           |           |
|------|----------|----------|------|-----------|-----------|
| chr6 | 30588489 | 30589479 | chr5 | 103099026 | 103099226 |
| chr6 | 30643272 | 30643372 | chr5 | 103099375 | 103099575 |
| chr6 | 30686252 | 30686352 | chr5 | 104398959 | 104399215 |
| chr6 | 31189670 | 31190119 | chr5 | 104528665 | 104528814 |
| chr6 | 31535148 | 31535504 | chr5 | 104664521 | 104664621 |
| chr6 | 32018670 | 32018871 | chr5 | 104664772 | 104665121 |
| chr6 | 33029494 | 33029743 | chr5 | 104819112 | 104819217 |
| chr6 | 33031694 | 33031794 | chr5 | 107314315 | 107314715 |
| chr6 | 33218040 | 33218146 | chr5 | 107544075 | 107544182 |
| chr6 | 34679032 | 34679284 | chr5 | 107581957 | 107582057 |
| chr6 | 34849469 | 34849618 | chr5 | 108020886 | 108021735 |
| chr6 | 35277574 | 35278108 | chr5 | 108343329 | 108343729 |
| chr6 | 35278357 | 35278457 | chr5 | 108683300 | 108683849 |
| chr6 | 38094716 | 38094915 | chr5 | 109005675 | 109005975 |
| chr6 | 38269600 | 38269700 | chr5 | 109278554 | 109278757 |
| chr6 | 38607974 | 38608074 | chr5 | 109295054 | 109295105 |
| chr6 | 38845844 | 38845944 | chr5 | 110725103 | 110725203 |
| chr6 | 38848044 | 38848193 | chr5 | 110887118 | 110887218 |
| chr6 | 38887376 | 38887881 | chr5 | 110888322 | 110888471 |
| chr6 | 38888530 | 38888730 | chr5 | 110904072 | 110904172 |
| chr6 | 39089189 | 39089391 | chr5 | 111004781 | 111004981 |
| chr6 | 39544516 | 39544616 | chr5 | 111231320 | 111231520 |
| chr6 | 39562473 | 39562573 | chr5 | 111397851 | 111397951 |
| chr6 | 39782127 | 39782227 | chr5 | 112380958 | 112381058 |
| chr6 | 40080043 | 40080592 | chr5 | 112873888 | 112873988 |
| chr6 | 40412806 | 40413206 | chr5 | 112894262 | 112894462 |
| chr6 | 40440105 | 40440258 | chr5 | 112943805 | 112944554 |
| chr6 | 40910548 | 40910948 | chr5 | 112960665 | 112960965 |
| chr6 | 42232249 | 42232698 | chr5 | 113010499 | 113010699 |
| chr6 | 42235729 | 42235878 | chr5 | 113780628 | 113780928 |
| chr6 | 42294471 | 42294671 | chr5 | 113782577 | 113782977 |
| chr6 | 42294920 | 42295120 | chr5 | 114289609 | 114289809 |
| chr6 | 42343159 | 42343408 | chr5 | 114289958 | 114290158 |
| chr6 | 47424135 | 47424435 | chr5 | 114374100 | 114374451 |
| chr6 | 48366221 | 48366421 | chr5 | 114548074 | 114548174 |
| chr6 | 48415868 | 48415968 | chr5 | 114633724 | 114634134 |
| chr6 | 48508026 | 48508475 | chr5 | 114646954 | 114647154 |
| chr6 | 48558805 | 48559008 | chr5 | 114739251 | 114739351 |
| chr6 | 48582191 | 48582291 | chr5 | 114767044 | 114767095 |
| chr6 | 48583140 | 48583440 | chr5 | 114994282 | 114994382 |
| chr6 | 48597546 | 48597746 | chr5 | 115019326 | 115019526 |
| chr6 | 48812333 | 48812882 | chr5 | 115020275 | 115020977 |
| chr6 | 49006936 | 49007085 | chr5 | 115207618 | 115207718 |

|      |          |          |      |           |           |
|------|----------|----------|------|-----------|-----------|
| chr6 | 49184625 | 49184925 | chr5 | 115414259 | 115414459 |
| chr6 | 49185995 | 49186115 | chr5 | 115561167 | 115561267 |
| chr6 | 49337537 | 49337637 | chr5 | 115561524 | 115561967 |
| chr6 | 49338186 | 49338486 | chr5 | 115650142 | 115650443 |
| chr6 | 50231681 | 50232130 | chr5 | 115758032 | 115758332 |
| chr6 | 50233681 | 50234030 | chr5 | 115758481 | 115758587 |
| chr6 | 50353649 | 50354405 | chr5 | 115774043 | 115774152 |
| chr6 | 52128332 | 52128632 | chr5 | 115825489 | 115825689 |
| chr6 | 52130233 | 52130582 | chr5 | 115911662 | 115911862 |
| chr6 | 52135746 | 52136295 | chr5 | 115965995 | 115966095 |
| chr6 | 52147513 | 52147613 | chr5 | 115979965 | 115980065 |
| chr6 | 52148168 | 52148362 | chr5 | 116269405 | 116269554 |
| chr6 | 52171806 | 52172217 | chr5 | 116270605 | 116270705 |
| chr6 | 52180288 | 52180388 | chr5 | 117062183 | 117062932 |
| chr6 | 52189588 | 52190249 | chr5 | 117755170 | 117755270 |
| chr6 | 52231439 | 52231539 | chr5 | 117926601 | 117926701 |
| chr6 | 53039260 | 53039360 | chr5 | 117958654 | 117958754 |
| chr6 | 54400131 | 54400231 | chr5 | 118053244 | 118053344 |
| chr6 | 54402233 | 54402482 | chr5 | 118505006 | 118505206 |
| chr6 | 54536741 | 54536841 | chr5 | 118808051 | 118808451 |
| chr6 | 54571656 | 54571805 | chr5 | 118883749 | 118883998 |
| chr6 | 54651681 | 54652181 | chr5 | 119198730 | 119199030 |
| chr6 | 55306990 | 55307190 | chr5 | 120309369 | 120309669 |
| chr6 | 55346271 | 55346520 | chr5 | 121071354 | 121071454 |
| chr6 | 55346771 | 55347220 | chr5 | 121113916 | 121114516 |
| chr6 | 56750977 | 56751172 | chr5 | 121115467 | 121116317 |
| chr6 | 56893739 | 56893939 | chr5 | 121142519 | 121142619 |
| chr6 | 57795584 | 57795684 | chr5 | 121148592 | 121148692 |
| chr6 | 58877624 | 58877824 | chr5 | 121228173 | 121228324 |
| chr6 | 65641520 | 65641920 | chr5 | 121252630 | 121252779 |
| chr6 | 65749397 | 65749448 | chr5 | 121350919 | 121351419 |
| chr6 | 66505577 | 66505826 | chr5 | 121352370 | 121352919 |
| chr6 | 70762064 | 70762313 | chr5 | 121649868 | 121650168 |
| chr6 | 70814943 | 70815392 | chr5 | 121830779 | 121830879 |
| chr6 | 70890431 | 70890580 | chr5 | 122142930 | 122143130 |
| chr6 | 71242028 | 71242128 | chr5 | 122185442 | 122185542 |
| chr6 | 71264524 | 71264624 | chr5 | 122299699 | 122299799 |
| chr6 | 71291290 | 71291490 | chr5 | 122477151 | 122477351 |
| chr6 | 71292039 | 71292539 | chr5 | 122687026 | 122687326 |
| chr6 | 71411416 | 71411516 | chr5 | 122739714 | 122739863 |
| chr6 | 71462672 | 71462921 | chr5 | 122903420 | 122903569 |
| chr6 | 71602848 | 71603048 | chr5 | 122923903 | 122924003 |
| chr6 | 71603197 | 71603597 | chr5 | 123012861 | 123012961 |

|      |          |          |      |           |           |
|------|----------|----------|------|-----------|-----------|
| chr6 | 71801609 | 71801809 | chr5 | 123029328 | 123029477 |
| chr6 | 72067791 | 72067991 | chr5 | 123061581 | 123061881 |
| chr6 | 72206005 | 72206056 | chr5 | 123283561 | 123283710 |
| chr6 | 72273380 | 72273584 | chr5 | 123345972 | 123346179 |
| chr6 | 72339827 | 72340727 | chr5 | 123654284 | 123654384 |
| chr6 | 72340976 | 72341076 | chr5 | 123792166 | 123792468 |
| chr6 | 72351071 | 72351220 | chr5 | 124163064 | 124163164 |
| chr6 | 72410289 | 72410486 | chr5 | 124212555 | 124212855 |
| chr6 | 72514164 | 72514415 | chr5 | 124323946 | 124324046 |
| chr6 | 72569115 | 72569264 | chr5 | 124547023 | 124547123 |
| chr6 | 73440604 | 73440695 | chr5 | 124612638 | 124612943 |
| chr6 | 77950316 | 77950416 | chr5 | 124751686 | 124751986 |
| chr6 | 81974002 | 81974102 | chr5 | 124755456 | 124755756 |
| chr6 | 82335153 | 82335353 | chr5 | 124967088 | 124967337 |
| chr6 | 82586795 | 82587195 | chr5 | 125194069 | 125194169 |
| chr6 | 82587644 | 82587750 | chr5 | 125194318 | 125194618 |
| chr6 | 82969053 | 82969502 | chr5 | 125535471 | 125535771 |
| chr6 | 82990457 | 82991257 | chr5 | 125674935 | 125675235 |
| chr6 | 82992006 | 82992219 | chr5 | 125849788 | 125849888 |
| chr6 | 83004804 | 83004904 | chr5 | 125850537 | 125851138 |
| chr6 | 83056053 | 83056153 | chr5 | 126011853 | 126011953 |
| chr6 | 83069418 | 83069518 | chr5 | 126112288 | 126112688 |
| chr6 | 83114139 | 83114339 | chr5 | 126146554 | 126146854 |
| chr6 | 83251883 | 83251983 | chr5 | 126147403 | 126147503 |
| chr6 | 83440824 | 83441373 | chr5 | 129129853 | 129130253 |
| chr6 | 83508265 | 83508514 | chr5 | 129297147 | 129297247 |
| chr6 | 83677146 | 83677295 | chr5 | 129432487 | 129432687 |
| chr6 | 83696373 | 83696473 | chr5 | 129716208 | 129716959 |
| chr6 | 83848510 | 83848610 | chr5 | 130254366 | 130254576 |
| chr6 | 83848859 | 83848959 | chr5 | 130281606 | 130281706 |
| chr6 | 83849010 | 83849159 | chr5 | 130484495 | 130484595 |
| chr6 | 85071748 | 85072097 | chr5 | 130512881 | 130512982 |
| chr6 | 85366418 | 85366767 | chr5 | 130554007 | 130554156 |
| chr6 | 85385202 | 85385602 | chr5 | 130575701 | 130575801 |
| chr6 | 85386351 | 85386551 | chr5 | 130669765 | 130669914 |
| chr6 | 85448121 | 85448221 | chr5 | 130812024 | 130812173 |
| chr6 | 85701874 | 85702023 | chr5 | 133210516 | 133210816 |
| chr6 | 85895621 | 85895721 | chr5 | 134766379 | 134766979 |
| chr6 | 85896070 | 85896170 | chr5 | 134843529 | 134843929 |
| chr6 | 85950044 | 85950244 | chr5 | 135123303 | 135123952 |
| chr6 | 85950393 | 85950744 | chr5 | 135414067 | 135414267 |
| chr6 | 86300285 | 86300485 | chr5 | 135599385 | 135599934 |
| chr6 | 86330974 | 86331123 | chr5 | 135614377 | 135614477 |

|      |          |          |      |           |           |
|------|----------|----------|------|-----------|-----------|
| chr6 | 86727410 | 86727510 | chr5 | 135675811 | 135676560 |
| chr6 | 86944506 | 86944606 | chr5 | 135731018 | 135731118 |
| chr6 | 86977009 | 86977109 | chr5 | 135774298 | 135774398 |
| chr6 | 86977458 | 86977658 | chr5 | 135816623 | 135816972 |
| chr6 | 87269569 | 87269818 | chr5 | 135854071 | 135854271 |
| chr6 | 87285369 | 87285469 | chr5 | 136018616 | 136018817 |
| chr6 | 87285618 | 87286225 | chr5 | 136061772 | 136062089 |
| chr6 | 87361528 | 87361879 | chr5 | 136231082 | 136231238 |
| chr6 | 87362128 | 87362228 | chr5 | 136231382 | 136231931 |
| chr6 | 87431347 | 87431596 | chr5 | 136313136 | 136313336 |
| chr6 | 87664915 | 87665015 | chr5 | 136410785 | 136410885 |
| chr6 | 87746750 | 87746850 | chr5 | 136444420 | 136445168 |
| chr6 | 87846822 | 87846971 | chr5 | 136445817 | 136446117 |
| chr6 | 88019011 | 88019311 | chr5 | 136554771 | 136555071 |
| chr6 | 88132614 | 88132714 | chr5 | 136601137 | 136601886 |
| chr6 | 88132863 | 88133014 | chr5 | 136705957 | 136706057 |
| chr6 | 88133363 | 88133463 | chr5 | 136783791 | 136784140 |
| chr6 | 88452647 | 88452947 | chr5 | 136802814 | 136802963 |
| chr6 | 88777201 | 88778050 | chr5 | 137360158 | 137360307 |
| chr6 | 88778201 | 88778301 | chr5 | 137803444 | 137803644 |
| chr6 | 88778450 | 88778750 | chr5 | 137940844 | 137940944 |
| chr6 | 88807991 | 88808191 | chr5 | 137960196 | 137960296 |
| chr6 | 89073951 | 89074100 | chr5 | 138138113 | 138138462 |
| chr6 | 89074851 | 89075300 | chr5 | 138156409 | 138156509 |
| chr6 | 89298094 | 89298445 | chr5 | 138206422 | 138206671 |
| chr6 | 89298594 | 89298894 | chr5 | 138221572 | 138222227 |
| chr6 | 90364573 | 90365029 | chr5 | 138223472 | 138223572 |
| chr6 | 90483331 | 90483531 | chr5 | 138282050 | 138282199 |
| chr6 | 90483983 | 90484180 | chr5 | 138298131 | 138298282 |
| chr6 | 90537763 | 90538063 | chr5 | 138398208 | 138398657 |
| chr6 | 90539312 | 90539812 | chr5 | 138431934 | 138432034 |
| chr6 | 90596372 | 90596672 | chr5 | 138823888 | 138823988 |
| chr6 | 91091101 | 91091301 | chr5 | 138824237 | 138824537 |
| chr6 | 91147147 | 91147796 | chr5 | 138830938 | 138831189 |
| chr6 | 91346402 | 91346702 | chr5 | 138916465 | 138916714 |
| chr6 | 91407734 | 91408083 | chr5 | 139094389 | 139094538 |
| chr6 | 91697482 | 91697631 | chr5 | 139283267 | 139283524 |
| chr6 | 91699003 | 91699352 | chr5 | 139285367 | 139285518 |
| chr6 | 91920693 | 91921693 | chr5 | 140087267 | 140087416 |
| chr6 | 92149295 | 92149544 | chr5 | 140432468 | 140432717 |
| chr6 | 92178771 | 92179020 | chr5 | 140474587 | 140474736 |
| chr6 | 92751261 | 92751410 | chr5 | 140475187 | 140475339 |
| chr6 | 95052245 | 95052345 | chr5 | 140525977 | 140526126 |

|      |           |           |      |           |           |
|------|-----------|-----------|------|-----------|-----------|
| chr6 | 96995985  | 96996185  | chr5 | 140606176 | 140606576 |
| chr6 | 97924416  | 97924616  | chr5 | 141021034 | 141021134 |
| chr6 | 97925372  | 97925574  | chr5 | 141348507 | 141348607 |
| chr6 | 99098343  | 99099492  | chr5 | 141401561 | 141401761 |
| chr6 | 99600796  | 99600996  | chr5 | 141404375 | 141404675 |
| chr6 | 99661366  | 99661866  | chr5 | 141421560 | 141422009 |
| chr6 | 100765727 | 100766078 | chr5 | 143580845 | 143580994 |
| chr6 | 107463706 | 107463806 | chr5 | 144075105 | 144075205 |
| chr6 | 108145877 | 108145977 | chr5 | 144076054 | 144076454 |
| chr6 | 110580057 | 110580257 | chr5 | 144136791 | 144137441 |
| chr6 | 112393411 | 112393511 | chr5 | 144137692 | 144137846 |
| chr6 | 112763481 | 112764281 | chr5 | 144380183 | 144380391 |
| chr6 | 112980437 | 112980986 | chr5 | 144447445 | 144447745 |
| chr6 | 113010549 | 113010749 | chr5 | 144448594 | 144449094 |
| chr6 | 113129644 | 113129944 | chr5 | 144500736 | 144500885 |
| chr6 | 113172152 | 113172203 | chr5 | 144536817 | 144537017 |
| chr6 | 113172452 | 113172552 | chr5 | 144638912 | 144639012 |
| chr6 | 113240938 | 113241038 | chr5 | 145163127 | 145163334 |
| chr6 | 113260621 | 113260821 | chr5 | 145282664 | 145283013 |
| chr6 | 113279033 | 113279382 | chr5 | 145458397 | 145458497 |
| chr6 | 113369466 | 113369715 | chr5 | 146029289 | 146029638 |
| chr6 | 113392294 | 113392594 | chr5 | 146277447 | 146277796 |
| chr6 | 113406184 | 113406233 | chr5 | 146350679 | 146350879 |
| chr6 | 113534364 | 113534913 | chr5 | 146351779 | 146352529 |
| chr6 | 113631328 | 113631428 | chr5 | 146407922 | 146408022 |
| chr6 | 113655291 | 113655440 | chr5 | 146408371 | 146408471 |
| chr6 | 113825087 | 113825187 | chr5 | 146473653 | 146473902 |
| chr6 | 113826488 | 113826637 | chr5 | 146499969 | 146500069 |
| chr6 | 113976468 | 113976970 | chr5 | 147544130 | 147544630 |
| chr6 | 114065233 | 114065333 | chr5 | 147607263 | 147607461 |
| chr6 | 114217315 | 114217366 | chr5 | 147698108 | 147698257 |
| chr6 | 114856369 | 114856523 | chr5 | 148107808 | 148107908 |
| chr6 | 115186265 | 115186365 | chr5 | 148144147 | 148144601 |
| chr6 | 115186714 | 115188016 | chr5 | 148261362 | 148261613 |
| chr6 | 115611920 | 115612269 | chr5 | 148388343 | 148389092 |
| chr6 | 115692978 | 115693327 | chr5 | 148582828 | 148583228 |
| chr6 | 115694678 | 115695330 | chr5 | 148619552 | 148619801 |
| chr6 | 115878355 | 115878904 | chr5 | 148742733 | 148742933 |
| chr6 | 115879455 | 115879604 | chr5 | 149171730 | 149173030 |
| chr6 | 115929330 | 115929430 | chr5 | 149269922 | 149270122 |
| chr6 | 116395847 | 116395944 | chr5 | 149712182 | 149712631 |
| chr6 | 116516861 | 116517210 | chr5 | 150274839 | 150275339 |
| chr6 | 116562894 | 116562994 | chr5 | 150399158 | 150399258 |

|      |           |           |      |           |           |
|------|-----------|-----------|------|-----------|-----------|
| chr6 | 116563143 | 116563243 | chr5 | 150529897 | 150529997 |
| chr6 | 116564194 | 116564294 | chr5 | 150748925 | 150749025 |
| chr6 | 116564846 | 116565343 | chr5 | 150864898 | 150865802 |
| chr6 | 116583315 | 116583615 | chr5 | 150973038 | 150973138 |
| chr6 | 116585264 | 116585364 | chr5 | 151931320 | 151931520 |
| chr6 | 117494262 | 117494462 | chr5 | 152002197 | 152002297 |
| chr6 | 117871852 | 117871952 | chr5 | 152289269 | 152289369 |
| chr6 | 117872103 | 117872301 | chr4 | 3762247   | 3762347   |
| chr6 | 118131899 | 118131999 | chr4 | 4065092   | 4065492   |
| chr6 | 119044171 | 119044320 | chr4 | 5571025   | 5571225   |
| chr6 | 119264850 | 119264999 | chr4 | 6381157   | 6381257   |
| chr6 | 119401828 | 119402077 | chr4 | 8165688   | 8166188   |
| chr6 | 119402228 | 119402678 | chr4 | 9596080   | 9596380   |
| chr6 | 119403028 | 119403189 | chr4 | 9771771   | 9771971   |
| chr6 | 119971696 | 119971796 | chr4 | 10801356  | 10801556  |
| chr6 | 120229125 | 120229425 | chr4 | 10934756  | 10935667  |
| chr6 | 120395800 | 120396501 | chr4 | 11083849  | 11084053  |
| chr6 | 120465216 | 120465316 | chr4 | 11117500  | 11117800  |
| chr6 | 120851186 | 120851286 | chr4 | 11181425  | 11181525  |
| chr6 | 121016856 | 121016956 | chr4 | 11182918  | 11183267  |
| chr6 | 121178372 | 121178821 | chr4 | 11486018  | 11486367  |
| chr6 | 122241926 | 122242526 | chr4 | 11629903  | 11630456  |
| chr6 | 122243475 | 122243575 | chr4 | 11631607  | 11631707  |
| chr6 | 122272476 | 122272875 | chr4 | 12067666  | 12067866  |
| chr6 | 122447792 | 122448141 | chr4 | 12098993  | 12099093  |
| chr6 | 122448292 | 122448441 | chr4 | 12834206  | 12834455  |
| chr6 | 122677843 | 122678043 | chr4 | 15075961  | 15076161  |
| chr6 | 122885349 | 122885649 | chr4 | 15192566  | 15192766  |
| chr6 | 122886698 | 122886798 | chr4 | 15885014  | 15885214  |
| chr6 | 124237072 | 124237172 | chr4 | 19496751  | 19497100  |
| chr6 | 124238021 | 124238221 | chr4 | 19501559  | 19502012  |
| chr6 | 124400290 | 124400390 | chr4 | 19968866  | 19969251  |
| chr6 | 124425950 | 124426499 | chr4 | 21491188  | 21491388  |
| chr6 | 124691401 | 124691501 | chr4 | 21491537  | 21491637  |
| chr6 | 124704126 | 124704926 | chr4 | 21694591  | 21694691  |
| chr6 | 124748429 | 124748529 | chr4 | 22121023  | 22121223  |
| chr6 | 124748878 | 124748978 | chr4 | 22253439  | 22253539  |
| chr6 | 124799735 | 124799935 | chr4 | 24661864  | 24662113  |
| chr6 | 124800094 | 124800284 | chr4 | 25044929  | 25045781  |
| chr6 | 124822626 | 124822875 | chr4 | 25563167  | 25563367  |
| chr6 | 124845622 | 124845771 | chr4 | 26110016  | 26110116  |
| chr6 | 124850428 | 124851179 | chr4 | 31808858  | 31808958  |
| chr6 | 124852597 | 124853102 | chr4 | 32083386  | 32083786  |

|      |           |           |      |          |          |
|------|-----------|-----------|------|----------|----------|
| chr6 | 124853848 | 124854097 | chr4 | 32460456 | 32460856 |
| chr6 | 124944175 | 124944575 | chr4 | 32645101 | 32645550 |
| chr6 | 125029628 | 125029736 | chr4 | 32840768 | 32840968 |
| chr6 | 125030179 | 125030379 | chr4 | 32841417 | 32841617 |
| chr6 | 125099493 | 125099693 | chr4 | 32876361 | 32876561 |
| chr6 | 125101493 | 125101642 | chr4 | 32908648 | 32908748 |
| chr6 | 125126216 | 125126365 | chr4 | 32977992 | 32978141 |
| chr6 | 125167477 | 125167577 | chr4 | 33035123 | 33035225 |
| chr6 | 125221205 | 125221397 | chr4 | 33053727 | 33054676 |
| chr6 | 125247771 | 125248371 | chr4 | 33155366 | 33155615 |
| chr6 | 125255069 | 125255469 | chr4 | 34435589 | 34435838 |
| chr6 | 125428672 | 125428772 | chr4 | 40676175 | 40676275 |
| chr6 | 125429521 | 125429821 | chr4 | 40803873 | 40804123 |
| chr6 | 125645368 | 125645568 | chr4 | 40980236 | 40980385 |
| chr6 | 127084965 | 127085065 | chr4 | 41054254 | 41054354 |
| chr6 | 127085314 | 127085514 | chr4 | 41429152 | 41429252 |
| chr6 | 127086365 | 127086914 | chr4 | 41436287 | 41436436 |
| chr6 | 127387839 | 127388188 | chr4 | 41446297 | 41446697 |
| chr6 | 127388239 | 127388488 | chr4 | 42956837 | 42957337 |
| chr6 | 127702646 | 127703995 | chr4 | 43029900 | 43030349 |
| chr6 | 127820538 | 127820987 | chr4 | 43031400 | 43031500 |
| chr6 | 128205638 | 128205739 | chr4 | 43411466 | 43411566 |
| chr6 | 128297516 | 128297616 | chr4 | 43488478 | 43488578 |
| chr6 | 128334022 | 128334571 | chr4 | 43583074 | 43583174 |
| chr6 | 133968949 | 133969449 | chr4 | 43583523 | 43583823 |
| chr6 | 134500625 | 134500725 | chr4 | 43841110 | 43841961 |
| chr6 | 134501683 | 134501783 | chr4 | 43879643 | 43880043 |
| chr6 | 134566780 | 134567980 | chr4 | 43960445 | 43960545 |
| chr6 | 134575123 | 134575772 | chr4 | 43961745 | 43962145 |
| chr6 | 134945562 | 134945711 | chr4 | 44172708 | 44173091 |
| chr6 | 135102731 | 135102828 | chr4 | 44715269 | 44715421 |
| chr6 | 136594162 | 136594262 | chr4 | 44716669 | 44716769 |
| chr6 | 136739825 | 136740125 | chr4 | 45324747 | 45324996 |
| chr6 | 136740274 | 136741125 | chr4 | 45853503 | 45853752 |
| chr6 | 136808751 | 136808851 | chr4 | 45976766 | 45976966 |
| chr6 | 136809606 | 136809703 | chr4 | 46063609 | 46063658 |
| chr6 | 136887268 | 136887817 | chr4 | 46143514 | 46143614 |
| chr6 | 138514314 | 138514763 | chr4 | 46200704 | 46200904 |
| chr6 | 139776030 | 139776238 | chr4 | 46202055 | 46202804 |
| chr6 | 140469710 | 140470259 | chr4 | 46348137 | 46348337 |
| chr6 | 140555298 | 140555647 | chr4 | 46455269 | 46455369 |
| chr6 | 140557598 | 140557798 | chr4 | 46654543 | 46654643 |
| chr6 | 140559147 | 140559347 | chr4 | 46655192 | 46655292 |



|      |           |           |      |          |          |
|------|-----------|-----------|------|----------|----------|
| chr6 | 142327309 | 142327409 | chr4 | 47096296 | 47096696 |
| chr6 | 142447261 | 142447410 | chr4 | 47212936 | 47213036 |
| chr6 | 142641636 | 142641836 | chr4 | 48544242 | 48544342 |
| chr6 | 142642085 | 142642185 | chr4 | 48666200 | 48666300 |
| chr6 | 142696490 | 142696690 | chr4 | 49063709 | 49064309 |
| chr6 | 144150461 | 144150811 | chr4 | 49064458 | 49064558 |
| chr6 | 144988742 | 144988842 | chr4 | 49526484 | 49526884 |
| chr6 | 145015664 | 145015813 | chr4 | 49686127 | 49686327 |
| chr6 | 145061715 | 145061864 | chr4 | 49686676 | 49686881 |
| chr6 | 145327334 | 145327883 | chr4 | 52443892 | 52444141 |
| chr6 | 145746812 | 145747663 | chr4 | 52599517 | 52599779 |
| chr6 | 145805621 | 145805721 | chr4 | 53444800 | 53444900 |
| chr6 | 145872327 | 145872627 | chr4 | 53635944 | 53636044 |
| chr6 | 145872776 | 145873076 | chr4 | 53718725 | 53719274 |
| chr6 | 146441586 | 146441686 | chr4 | 53783148 | 53783498 |
| chr6 | 146745003 | 146745103 | chr4 | 53830605 | 53831054 |
| chr6 | 146828552 | 146828652 | chr4 | 55354500 | 55354700 |
| chr6 | 146972510 | 146972710 | chr4 | 56797027 | 56797741 |
| chr6 | 147416193 | 147416393 | chr4 | 57499437 | 57499537 |
| chr6 | 147986889 | 147987738 | chr4 | 57888530 | 57888730 |
| chr6 | 148294064 | 148294264 | chr4 | 58217051 | 58217151 |
| chr6 | 149249004 | 149249253 | chr4 | 58485458 | 58485658 |
| chr5 | 3336305   | 3336754   | chr4 | 58966863 | 58967212 |
| chr5 | 3838822   | 3839022   | chr4 | 59557216 | 59557616 |
| chr5 | 4751914   | 4752114   | chr4 | 59715394 | 59715494 |
| chr5 | 5743005   | 5743154   | chr4 | 59847395 | 59847695 |
| chr5 | 8616795   | 8616995   | chr4 | 62359875 | 62360324 |
| chr5 | 8790879   | 8791128   | chr4 | 72036813 | 72037013 |
| chr5 | 9260503   | 9260603   | chr4 | 73610879 | 73611179 |
| chr5 | 20382287  | 20382392  | chr4 | 73611528 | 73611628 |
| chr5 | 20685200  | 20685500  | chr4 | 74072327 | 74072527 |
| chr5 | 20686400  | 20686555  | chr4 | 75098363 | 75098612 |
| chr5 | 20870914  | 20871263  | chr4 | 76414976 | 76415231 |
| chr5 | 21146044  | 21146144  | chr4 | 81262849 | 81262949 |
| chr5 | 21201157  | 21201257  | chr4 | 82325400 | 82325600 |
| chr5 | 21235720  | 21236025  | chr4 | 82327449 | 82327549 |
| chr5 | 21365216  | 21365365  | chr4 | 82679784 | 82679884 |
| chr5 | 21366316  | 21366665  | chr4 | 82842679 | 82842779 |
| chr5 | 21844951  | 21845051  | chr4 | 83144915 | 83145115 |
| chr5 | 22933231  | 22933631  | chr4 | 83477755 | 83477912 |
| chr5 | 22933780  | 22934180  | chr4 | 84703803 | 84704134 |
| chr5 | 22934531  | 22934680  | chr4 | 85025635 | 85025835 |
| chr5 | 23532089  | 23532289  | chr4 | 86396162 | 86396711 |

|      |          |          |      |           |           |
|------|----------|----------|------|-----------|-----------|
| chr5 | 23853624 | 23854075 | chr4 | 86432099  | 86432548  |
| chr5 | 23854324 | 23854524 | chr4 | 87050600  | 87051049  |
| chr5 | 23865689 | 23865889 | chr4 | 87853548  | 87853648  |
| chr5 | 23893463 | 23893663 | chr4 | 89114982  | 89115082  |
| chr5 | 23915021 | 23915221 | chr4 | 93177024  | 93177124  |
| chr5 | 23947755 | 23948455 | chr4 | 94397648  | 94397948  |
| chr5 | 24041868 | 24042268 | chr4 | 94398097  | 94398401  |
| chr5 | 24078930 | 24079030 | chr4 | 94444242  | 94444691  |
| chr5 | 24104122 | 24104424 | chr4 | 94821365  | 94821465  |
| chr5 | 24104873 | 24105522 | chr4 | 94893851  | 94894000  |
| chr5 | 24214541 | 24214641 | chr4 | 96434449  | 96434598  |
| chr5 | 24215741 | 24215792 | chr4 | 98658401  | 98658950  |
| chr5 | 24216041 | 24216341 | chr4 | 98962373  | 98962673  |
| chr5 | 24258914 | 24259014 | chr4 | 99497562  | 99497662  |
| chr5 | 24259463 | 24259865 | chr4 | 99776784  | 99776984  |
| chr5 | 25017720 | 25017820 | chr4 | 99943068  | 99943268  |
| chr5 | 25017969 | 25018169 | chr4 | 100325844 | 100326293 |
| chr5 | 28113981 | 28114081 | chr4 | 100623756 | 100623956 |
| chr5 | 28561266 | 28561415 | chr4 | 101112560 | 101112660 |
| chr5 | 29518170 | 29518319 | chr4 | 101266385 | 101266685 |
| chr5 | 29699985 | 29700734 | chr4 | 101397771 | 101398044 |
| chr5 | 30395774 | 30395974 | chr4 | 101494660 | 101494960 |
| chr5 | 30396123 | 30396223 | chr4 | 102874955 | 102875404 |
| chr5 | 30789567 | 30789616 | chr4 | 102960396 | 102960699 |
| chr5 | 30793941 | 30794341 | chr4 | 104214143 | 104214343 |
| chr5 | 30993815 | 30993925 | chr4 | 104956996 | 104957096 |
| chr5 | 31039459 | 31039559 | chr4 | 106406934 | 106407089 |
| chr5 | 31141420 | 31141769 | chr4 | 106469426 | 106469626 |
| chr5 | 31141820 | 31142069 | chr4 | 106469975 | 106470175 |
| chr5 | 31142620 | 31142769 | chr4 | 106527460 | 106527660 |
| chr5 | 31240250 | 31240499 | chr4 | 106527909 | 106528109 |
| chr5 | 31241450 | 31241750 | chr4 | 106647293 | 106647493 |
| chr5 | 31249818 | 31250218 | chr4 | 106758148 | 106758248 |
| chr5 | 31296794 | 31296894 | chr4 | 106913623 | 106914172 |
| chr5 | 31376223 | 31376423 | chr4 | 106982977 | 106983273 |
| chr5 | 31376772 | 31376823 | chr4 | 107411218 | 107411468 |
| chr5 | 31383218 | 31383367 | chr4 | 107649238 | 107649438 |
| chr5 | 31421712 | 31421812 | chr4 | 107670400 | 107671249 |
| chr5 | 31444576 | 31445076 | chr4 | 107721363 | 107721463 |
| chr5 | 31445225 | 31445325 | chr4 | 107737176 | 107737276 |
| chr5 | 31507909 | 31508009 | chr4 | 107737525 | 107737625 |
| chr5 | 31509810 | 31509959 | chr4 | 108253492 | 108254041 |
| chr5 | 31519917 | 31520018 | chr4 | 108426798 | 108427047 |

|      |          |          |      |           |           |
|------|----------|----------|------|-----------|-----------|
| chr5 | 31530398 | 31530498 | chr4 | 108466633 | 108466933 |
| chr5 | 31569005 | 31569205 | chr4 | 108680155 | 108680804 |
| chr5 | 31579229 | 31579881 | chr4 | 108695334 | 108695583 |
| chr5 | 31625350 | 31625699 | chr4 | 108964997 | 108965146 |
| chr5 | 33380140 | 33380689 | chr4 | 109127629 | 109127757 |
| chr5 | 33471974 | 33472474 | chr4 | 109506105 | 109506757 |
| chr5 | 33587024 | 33587724 | chr4 | 109514101 | 109514501 |
| chr5 | 34363224 | 34363473 | chr4 | 114756500 | 114756600 |
| chr5 | 34364673 | 34364724 | chr4 | 114834271 | 114834571 |
| chr5 | 34656265 | 34656465 | chr4 | 114847117 | 114847466 |
| chr5 | 34658165 | 34658414 | chr4 | 114907156 | 114907256 |
| chr5 | 34658465 | 34658614 | chr4 | 115494783 | 115495032 |
| chr5 | 34882269 | 34882369 | chr4 | 115632083 | 115632383 |
| chr5 | 34941754 | 34941954 | chr4 | 115675175 | 115675489 |
| chr5 | 34942303 | 34942603 | chr4 | 115686723 | 115686982 |
| chr5 | 35006255 | 35006555 | chr4 | 115729777 | 115729926 |
| chr5 | 35130180 | 35130280 | chr4 | 115731477 | 115731577 |
| chr5 | 35424269 | 35425220 | chr4 | 115731826 | 115732126 |
| chr5 | 35646050 | 35646299 | chr4 | 115787653 | 115787853 |
| chr5 | 35757602 | 35757802 | chr4 | 115865029 | 115865129 |
| chr5 | 35942997 | 35943097 | chr4 | 115997403 | 115997652 |
| chr5 | 35944997 | 35945246 | chr4 | 116015076 | 116015225 |
| chr5 | 35957849 | 35958249 | chr4 | 116068196 | 116068296 |
| chr5 | 36260055 | 36260604 | chr4 | 116068645 | 116068845 |
| chr5 | 36261755 | 36261955 | chr4 | 116404705 | 116405354 |
| chr5 | 37362598 | 37362698 | chr4 | 116668586 | 116668735 |
| chr5 | 37544393 | 37545593 | chr4 | 116724179 | 116724379 |
| chr5 | 37740220 | 37740320 | chr4 | 116842525 | 116842825 |
| chr5 | 38653845 | 38654645 | chr4 | 116980730 | 116981030 |
| chr5 | 38654896 | 38655345 | chr4 | 117003559 | 117003975 |
| chr5 | 38714827 | 38714927 | chr4 | 117761777 | 117762077 |
| chr5 | 38771165 | 38771365 | chr4 | 117762226 | 117762326 |
| chr5 | 38771914 | 38772014 | chr4 | 117776541 | 117776741 |
| chr5 | 38813137 | 38813337 | chr4 | 117982517 | 117982617 |
| chr5 | 38813586 | 38814186 | chr4 | 118124324 | 118124473 |
| chr5 | 38995881 | 38996430 | chr4 | 118207588 | 118207737 |
| chr5 | 40249753 | 40249853 | chr4 | 118284476 | 118284876 |
| chr5 | 42258499 | 42258599 | chr4 | 118305249 | 118305498 |
| chr5 | 44276575 | 44276775 | chr4 | 118338039 | 118338292 |
| chr5 | 44595411 | 44595711 | chr4 | 118391306 | 118391706 |
| chr5 | 49003890 | 49004090 | chr4 | 118417274 | 118417374 |
| chr5 | 52870820 | 52870920 | chr4 | 118467103 | 118467258 |
| chr5 | 53541969 | 53542072 | chr4 | 118467803 | 118468003 |

|      |          |          |      |           |           |
|------|----------|----------|------|-----------|-----------|
| chr5 | 53543211 | 53543360 | chr4 | 118468352 | 118468552 |
| chr5 | 53708098 | 53708698 | chr4 | 118538406 | 118538711 |
| chr5 | 54083199 | 54083399 | chr4 | 118955945 | 118956045 |
| chr5 | 64595496 | 64595896 | chr4 | 119037154 | 119037454 |
| chr5 | 64596045 | 64596745 | chr4 | 119042284 | 119042733 |
| chr5 | 65701054 | 65701208 | chr4 | 119065444 | 119065644 |
| chr5 | 65893839 | 65894339 | chr4 | 119067253 | 119067344 |
| chr5 | 66507777 | 66508077 | chr4 | 119101518 | 119101667 |
| chr5 | 66603292 | 66603692 | chr4 | 119269350 | 119269499 |
| chr5 | 66603841 | 66604251 | chr4 | 119386962 | 119387062 |
| chr5 | 68350923 | 68351023 | chr4 | 120008407 | 120008507 |
| chr5 | 68534577 | 68534877 | chr4 | 120009107 | 120009356 |
| chr5 | 68535426 | 68535628 | chr4 | 120134336 | 120134636 |
| chr5 | 72051048 | 72051148 | chr4 | 120252483 | 120252783 |
| chr5 | 72051401 | 72051552 | chr4 | 120417988 | 120418088 |
| chr5 | 72161400 | 72161600 | chr4 | 120514175 | 120514275 |
| chr5 | 73084476 | 73085327 | chr4 | 120885806 | 120886106 |
| chr5 | 73239445 | 73240094 | chr4 | 122847981 | 122848081 |
| chr5 | 73373038 | 73373487 | chr4 | 122966441 | 122966541 |
| chr5 | 73672431 | 73672531 | chr4 | 122968341 | 122968441 |
| chr5 | 73842253 | 73842856 | chr4 | 123085735 | 123086038 |
| chr5 | 73994024 | 73994224 | chr4 | 123195335 | 123195535 |
| chr5 | 74151036 | 74151136 | chr4 | 123195886 | 123196135 |
| chr5 | 74578364 | 74578464 | chr4 | 123769493 | 123769693 |
| chr5 | 74579013 | 74579113 | chr4 | 124508635 | 124509035 |
| chr5 | 75187877 | 75187926 | chr4 | 124654904 | 124655004 |
| chr5 | 76085176 | 76085276 | chr4 | 124714904 | 124715304 |
| chr5 | 76702328 | 76702481 | chr4 | 124734007 | 124734456 |
| chr5 | 76734399 | 76734648 | chr4 | 124787641 | 124787798 |
| chr5 | 76787280 | 76787582 | chr4 | 124882121 | 124882670 |
| chr5 | 76798097 | 76799216 | chr4 | 124980224 | 124980373 |
| chr5 | 76899847 | 76900347 | chr4 | 125948638 | 125948738 |
| chr5 | 76995777 | 76996595 | chr4 | 126000037 | 126000537 |
| chr5 | 84200010 | 84200159 | chr4 | 126015459 | 126015559 |
| chr5 | 85848609 | 85848660 | chr4 | 126056036 | 126056286 |
| chr5 | 85955732 | 85955881 | chr4 | 126108622 | 126108722 |
| chr5 | 85955932 | 85956081 | chr4 | 126139141 | 126139341 |
| chr5 | 88504245 | 88504345 | chr4 | 126173387 | 126173487 |
| chr5 | 88717635 | 88717984 | chr4 | 126177732 | 126178432 |
| chr5 | 90148537 | 90148837 | chr4 | 126282027 | 126282127 |
| chr5 | 90555364 | 90555564 | chr4 | 126321054 | 126321154 |
| chr5 | 90568854 | 90569403 | chr4 | 126460498 | 126460698 |
| chr5 | 90674161 | 90674410 | chr4 | 126461749 | 126461898 |

|      |           |           |      |           |           |
|------|-----------|-----------|------|-----------|-----------|
| chr5 | 90686672  | 90687121  | chr4 | 126462249 | 126462407 |
| chr5 | 91300496  | 91300945  | chr4 | 126607238 | 126607487 |
| chr5 | 91825707  | 91825907  | chr4 | 126873421 | 126873521 |
| chr5 | 92040830  | 92041086  | chr4 | 127096147 | 127096247 |
| chr5 | 92171143  | 92171456  | chr4 | 127182671 | 127183120 |
| chr5 | 92354288  | 92354388  | chr4 | 128471773 | 128472638 |
| chr5 | 92457928  | 92458028  | chr4 | 128611490 | 128611790 |
| chr5 | 92875808  | 92876008  | chr4 | 128814301 | 128815150 |
| chr5 | 92876357  | 92876457  | chr4 | 128843997 | 128844048 |
| chr5 | 96991390  | 96991690  | chr4 | 128956499 | 128956648 |
| chr5 | 98074244  | 98074503  | chr4 | 128972099 | 128972399 |
| chr5 | 98649047  | 98649500  | chr4 | 129041137 | 129041237 |
| chr5 | 98649749  | 98649900  | chr4 | 129042096 | 129042196 |
| chr5 | 99654615  | 99654715  | chr4 | 129187109 | 129187209 |
| chr5 | 99655464  | 99655715  | chr4 | 129187558 | 129187758 |
| chr5 | 100777274 | 100777423 | chr4 | 129292475 | 129292575 |
| chr5 | 101414494 | 101414594 | chr4 | 129312062 | 129312416 |
| chr5 | 101414743 | 101414951 | chr4 | 129314012 | 129314112 |
| chr5 | 101416343 | 101416443 | chr4 | 129344203 | 129344303 |
| chr5 | 101464418 | 101464518 | chr4 | 129410905 | 129411105 |
| chr5 | 102282896 | 102283696 | chr4 | 129411956 | 129412512 |
| chr5 | 103097426 | 103097579 | chr4 | 129454539 | 129454639 |
| chr5 | 104079570 | 104079919 | chr4 | 129690956 | 129691256 |
| chr5 | 104731740 | 104731940 | chr4 | 129900322 | 129900422 |
| chr5 | 105075689 | 105077089 | chr4 | 130236385 | 130236487 |
| chr5 | 105600553 | 105600892 | chr4 | 130238336 | 130238489 |
| chr5 | 105601941 | 105602250 | chr4 | 130502542 | 130503042 |
| chr5 | 106310763 | 106311065 | chr4 | 130750067 | 130750267 |
| chr5 | 107075602 | 107075902 | chr4 | 131678081 | 131678281 |
| chr5 | 107077051 | 107077151 | chr4 | 131737184 | 131737540 |
| chr5 | 107543526 | 107543626 | chr4 | 131912251 | 131912951 |
| chr5 | 107908156 | 107908356 | chr4 | 132092908 | 132093557 |
| chr5 | 107908905 | 107909105 | chr4 | 132113870 | 132113970 |
| chr5 | 107948194 | 107948294 | chr4 | 132114119 | 132114619 |
| chr5 | 108215172 | 108215472 | chr4 | 132168955 | 132169404 |
| chr5 | 108215621 | 108215821 | chr4 | 132185565 | 132185668 |
| chr5 | 108341580 | 108341780 | chr4 | 132934995 | 132935195 |
| chr5 | 108447706 | 108447906 | chr4 | 132970197 | 132970846 |
| chr5 | 109066427 | 109066876 | chr4 | 133117041 | 133117803 |
| chr5 | 109079417 | 109079517 | chr4 | 133179108 | 133179508 |
| chr5 | 109294905 | 109295005 | chr4 | 133208182 | 133208382 |
| chr5 | 109295154 | 109295259 | chr4 | 133358388 | 133358688 |
| chr5 | 109311751 | 109311851 | chr4 | 133392343 | 133392592 |

|      |           |           |      |           |           |
|------|-----------|-----------|------|-----------|-----------|
| chr5 | 109312600 | 109312700 | chr4 | 133412947 | 133413047 |
| chr5 | 110176282 | 110176482 | chr4 | 133467930 | 133468130 |
| chr5 | 110176831 | 110176931 | chr4 | 133512623 | 133512723 |
| chr5 | 110717504 | 110717753 | chr4 | 133858070 | 133858927 |
| chr5 | 110753400 | 110753600 | chr4 | 133942710 | 133942810 |
| chr5 | 110887567 | 110887671 | chr4 | 134067922 | 134069071 |
| chr5 | 110960448 | 110960697 | chr4 | 134154786 | 134155235 |
| chr5 | 110971544 | 110972293 | chr4 | 134336331 | 134336680 |
| chr5 | 111232469 | 111233069 | chr4 | 134375062 | 134375162 |
| chr5 | 111388612 | 111388912 | chr4 | 134382159 | 134382359 |
| chr5 | 111398000 | 111398100 | chr4 | 134693533 | 134693933 |
| chr5 | 111398251 | 111398400 | chr4 | 134754270 | 134754519 |
| chr5 | 111457463 | 111457612 | chr4 | 134770633 | 134770733 |
| chr5 | 111840256 | 111840456 | chr4 | 134959847 | 134959998 |
| chr5 | 112381107 | 112381309 | chr4 | 135113065 | 135113163 |
| chr5 | 113632851 | 113633000 | chr4 | 135237475 | 135237675 |
| chr5 | 113686152 | 113687652 | chr4 | 135238979 | 135239279 |
| chr5 | 113698115 | 113699015 | chr4 | 135412874 | 135413223 |
| chr5 | 113699864 | 113700264 | chr4 | 135414274 | 135414774 |
| chr5 | 113781677 | 113782128 | chr4 | 135414974 | 135415125 |
| chr5 | 113927956 | 113928156 | chr4 | 135786498 | 135786647 |
| chr5 | 113928923 | 113929006 | chr4 | 135804218 | 135804618 |
| chr5 | 114373851 | 114374051 | chr4 | 135892774 | 135893374 |
| chr5 | 114375100 | 114375202 | chr4 | 136302256 | 136302456 |
| chr5 | 114409930 | 114410130 | chr4 | 136442513 | 136442613 |
| chr5 | 114438877 | 114440026 | chr4 | 136676138 | 136676238 |
| chr5 | 114469352 | 114469801 | chr4 | 136676389 | 136676538 |
| chr5 | 114647703 | 114648654 | chr4 | 136796521 | 136797021 |
| chr5 | 114767144 | 114767244 | chr4 | 136888049 | 136888398 |
| chr5 | 114768095 | 114768644 | chr4 | 138056132 | 138056232 |
| chr5 | 114769295 | 114769495 | chr4 | 138101904 | 138102304 |
| chr5 | 114804885 | 114804985 | chr4 | 138142591 | 138142940 |
| chr5 | 114912580 | 114912981 | chr4 | 138207909 | 138208258 |
| chr5 | 114913931 | 114914130 | chr4 | 138274374 | 138274725 |
| chr5 | 114995433 | 114996133 | chr4 | 138564999 | 138565348 |
| chr5 | 115298557 | 115298857 | chr4 | 138658964 | 138659313 |
| chr5 | 115329454 | 115329654 | chr4 | 138660564 | 138660713 |
| chr5 | 115330405 | 115331903 | chr4 | 139032384 | 139032484 |
| chr5 | 115461975 | 115462324 | chr4 | 139032933 | 139033133 |
| chr5 | 115492481 | 115492532 | chr4 | 139192046 | 139192295 |
| chr5 | 115610506 | 115611606 | chr4 | 139462200 | 139463071 |
| chr5 | 115798114 | 115798669 | chr4 | 139491291 | 139491840 |
| chr5 | 115873466 | 115873766 | chr4 | 139806847 | 139806947 |

|      |           |           |      |           |           |
|------|-----------|-----------|------|-----------|-----------|
| chr5 | 115874715 | 115874822 | chr4 | 140488004 | 140488204 |
| chr5 | 115940102 | 115940302 | chr4 | 140614188 | 140614988 |
| chr5 | 115980414 | 115980514 | chr4 | 140650451 | 140651325 |
| chr5 | 115987823 | 115988023 | chr4 | 140651774 | 140652074 |
| chr5 | 116066903 | 116067152 | chr4 | 140686458 | 140686910 |
| chr5 | 116068403 | 116068503 | chr4 | 140745780 | 140746029 |
| chr5 | 116197233 | 116197433 | chr4 | 140826974 | 140827074 |
| chr5 | 116271754 | 116272754 | chr4 | 140850249 | 140850449 |
| chr5 | 116663047 | 116663347 | chr4 | 140850598 | 140850898 |
| chr5 | 116663796 | 116663896 | chr4 | 140917837 | 140918037 |
| chr5 | 116664947 | 116665403 | chr4 | 140979199 | 140979399 |
| chr5 | 117061483 | 117061583 | chr4 | 140987490 | 140987690 |
| chr5 | 117063183 | 117063332 | chr4 | 141082137 | 141082286 |
| chr5 | 117957705 | 117958105 | chr4 | 141255884 | 141256284 |
| chr5 | 117994392 | 117995145 | chr4 | 141275859 | 141276008 |
| chr5 | 117996118 | 117996218 | chr4 | 141284237 | 141284437 |
| chr5 | 118052487 | 118052695 | chr4 | 141385246 | 141385346 |
| chr5 | 118665911 | 118666211 | chr4 | 141386304 | 141386404 |
| chr5 | 118793873 | 118793973 | chr4 | 141436855 | 141437055 |
| chr5 | 118794122 | 118794822 | chr4 | 141464937 | 141464988 |
| chr5 | 118795384 | 118796133 | chr4 | 141465237 | 141465337 |
| chr5 | 120308069 | 120308618 | chr4 | 141525215 | 141525364 |
| chr5 | 121070305 | 121070654 | chr4 | 141563122 | 141563322 |
| chr5 | 121071505 | 121071654 | chr4 | 141630463 | 141630663 |
| chr5 | 121113167 | 121113567 | chr4 | 141924507 | 141924607 |
| chr5 | 121149641 | 121150241 | chr4 | 145159489 | 145159738 |
| chr5 | 121226724 | 121228124 | chr4 | 147809271 | 147809371 |
| chr5 | 121229199 | 121229511 | chr4 | 147841122 | 147841222 |
| chr5 | 121350570 | 121350770 | chr4 | 148034716 | 148034916 |
| chr5 | 121418360 | 121418709 | chr4 | 148055942 | 148056491 |
| chr5 | 121452350 | 121452499 | chr4 | 148348869 | 148349018 |
| chr5 | 121649219 | 121649719 | chr4 | 148460975 | 148461475 |
| chr5 | 122025136 | 122025236 | chr4 | 148462675 | 148463324 |
| chr5 | 122141881 | 122142181 | chr4 | 148530914 | 148531463 |
| chr5 | 122300548 | 122301199 | chr4 | 149008326 | 149008975 |
| chr5 | 122301448 | 122301772 | chr4 | 149041568 | 149042217 |
| chr5 | 122350475 | 122350575 | chr4 | 149212065 | 149212265 |
| chr5 | 122488148 | 122488448 | chr4 | 149331216 | 149331316 |
| chr5 | 122688926 | 122689175 | chr4 | 149387750 | 149387850 |
| chr5 | 122740314 | 122740463 | chr4 | 149389150 | 149389999 |
| chr5 | 122777363 | 122777863 | chr4 | 149602856 | 149603260 |
| chr5 | 122778112 | 122779412 | chr4 | 149642501 | 149642601 |
| chr5 | 122797379 | 122797686 | chr4 | 149859573 | 149859773 |

|      |           |           |      |           |           |
|------|-----------|-----------|------|-----------|-----------|
| chr5 | 122994164 | 122994464 | chr4 | 149860524 | 149860673 |
| chr5 | 123031328 | 123031528 | chr4 | 149913290 | 149913390 |
| chr5 | 123142745 | 123142846 | chr4 | 150023261 | 150023561 |
| chr5 | 123281811 | 123282211 | chr4 | 150102837 | 150102937 |
| chr5 | 123282710 | 123282810 | chr4 | 150103994 | 150104194 |
| chr5 | 123282961 | 123283410 | chr4 | 150948507 | 150948607 |
| chr5 | 123347123 | 123347223 | chr4 | 150948956 | 150949007 |
| chr5 | 123489688 | 123490037 | chr4 | 150949256 | 150949356 |
| chr5 | 123626953 | 123627553 | chr4 | 151893364 | 151893565 |
| chr5 | 123771496 | 123771745 | chr4 | 151913308 | 151913508 |
| chr5 | 123790717 | 123791317 | chr4 | 151942551 | 151942700 |
| chr5 | 123983133 | 123983433 | chr4 | 151943559 | 151943759 |
| chr5 | 124127150 | 124127499 | chr4 | 151999887 | 152000536 |
| chr5 | 124163913 | 124164213 | chr4 | 152000685 | 152001136 |
| chr5 | 124361940 | 124362089 | chr4 | 152033692 | 152033992 |
| chr5 | 124504848 | 124505245 | chr4 | 152056874 | 152056977 |
| chr5 | 124519752 | 124520053 | chr4 | 152062033 | 152062133 |
| chr5 | 124545023 | 124545227 | chr4 | 152222775 | 152223375 |
| chr5 | 124546474 | 124546574 | chr4 | 152602206 | 152602406 |
| chr5 | 124671360 | 124671709 | chr4 | 153859754 | 153859954 |
| chr5 | 124735247 | 124735347 | chr4 | 153878978 | 153879278 |
| chr5 | 124855318 | 124855418 | chr4 | 153930168 | 153930317 |
| chr5 | 124855967 | 124856367 | chr4 | 153946995 | 153947444 |
| chr5 | 125079229 | 125079329 | chr4 | 154044975 | 154045175 |
| chr5 | 125079478 | 125079778 | chr4 | 154434807 | 154434898 |
| chr5 | 125218570 | 125219020 | chr4 | 154540285 | 154540385 |
| chr5 | 125675584 | 125675684 | chr4 | 154542447 | 154542547 |
| chr5 | 126012102 | 126013002 | chr4 | 154759265 | 154759414 |
| chr5 | 126061361 | 126061461 | chr4 | 154865689 | 154865789 |
| chr5 | 126105030 | 126105379 | chr4 | 154868550 | 154868650 |
| chr5 | 126106630 | 126106879 | chr4 | 154990215 | 154990315 |
| chr5 | 128289178 | 128289278 | chr4 | 154990964 | 154991064 |
| chr5 | 129296747 | 129296896 | chr4 | 155128087 | 155128287 |
| chr5 | 129705465 | 129705565 | chr4 | 155301980 | 155302080 |
| chr5 | 129715259 | 129715459 | chr4 | 155302529 | 155302629 |
| chr5 | 130253217 | 130254117 | chr4 | 155505743 | 155505892 |
| chr5 | 130280955 | 130281357 | chr4 | 155529186 | 155529386 |
| chr5 | 130366615 | 130367264 | chr4 | 155529635 | 155529735 |
| chr5 | 130421072 | 130421221 | chr4 | 155557751 | 155558051 |
| chr5 | 130512232 | 130512432 | chr3 | 5592755   | 5592955   |
| chr5 | 130608876 | 130608976 | chr3 | 5593404   | 5593504   |
| chr5 | 130609425 | 130609525 | chr3 | 8683513   | 8683713   |
| chr5 | 130694991 | 130695091 | chr3 | 8684562   | 8684762   |



|      |           |           |      |          |          |
|------|-----------|-----------|------|----------|----------|
| chr5 | 130810573 | 130811873 | chr3 | 9021291  | 9021691  |
| chr5 | 131115537 | 131115737 | chr3 | 10369088 | 10370088 |
| chr5 | 131116186 | 131116286 | chr3 | 10384440 | 10384897 |
| chr5 | 131973555 | 131973755 | chr3 | 14601026 | 14602063 |
| chr5 | 133210067 | 133210167 | chr3 | 14886393 | 14886642 |
| chr5 | 134850954 | 134851054 | chr3 | 14909316 | 14909516 |
| chr5 | 135219596 | 135219696 | chr3 | 14909665 | 14909716 |
| chr5 | 135228058 | 135228455 | chr3 | 15790998 | 15791098 |
| chr5 | 135249632 | 135249732 | chr3 | 17662050 | 17662550 |
| chr5 | 135281736 | 135281985 | chr3 | 18770614 | 18771063 |
| chr5 | 135582388 | 135583388 | chr3 | 18796441 | 18796541 |
| chr5 | 135651729 | 135652929 | chr3 | 18873706 | 18873855 |
| chr5 | 135688884 | 135689433 | chr3 | 19762386 | 19762935 |
| chr5 | 135690584 | 135690684 | chr3 | 21682554 | 21683165 |
| chr5 | 135691033 | 135691133 | chr3 | 26244650 | 26244856 |
| chr5 | 135732067 | 135732367 | chr3 | 26760207 | 26760307 |
| chr5 | 135733418 | 135733967 | chr3 | 28412230 | 28412630 |
| chr5 | 135745128 | 135745528 | chr3 | 30400090 | 30400339 |
| chr5 | 135835227 | 135835327 | chr3 | 30576156 | 30576256 |
| chr5 | 136017553 | 136017865 | chr3 | 30602636 | 30602985 |
| chr5 | 136019272 | 136019466 | chr3 | 30755596 | 30755896 |
| chr5 | 136020666 | 136020866 | chr3 | 30917161 | 30917310 |
| chr5 | 136035272 | 136035722 | chr3 | 31507668 | 31507820 |
| chr5 | 136239638 | 136240387 | chr3 | 31971840 | 31972240 |
| chr5 | 136299810 | 136299910 | chr3 | 32043320 | 32043625 |
| chr5 | 136355545 | 136355645 | chr3 | 32314620 | 32314820 |
| chr5 | 136356494 | 136356694 | chr3 | 32688924 | 32689273 |
| chr5 | 136411434 | 136412241 | chr3 | 33406806 | 33406906 |
| chr5 | 136646717 | 136646985 | chr3 | 34256568 | 34256717 |
| chr5 | 136661933 | 136662033 | chr3 | 35360144 | 35360244 |
| chr5 | 136705408 | 136705808 | chr3 | 36082993 | 36083651 |
| chr5 | 136837269 | 136837719 | chr3 | 36278155 | 36278347 |
| chr5 | 136865567 | 136865867 | chr3 | 36954644 | 36954744 |
| chr5 | 136866116 | 136866416 | chr3 | 36955293 | 36955393 |
| chr5 | 136912465 | 136912865 | chr3 | 36956344 | 36956493 |
| chr5 | 137551220 | 137551869 | chr3 | 36956544 | 36956695 |
| chr5 | 137574362 | 137574571 | chr3 | 37026841 | 37027041 |
| chr5 | 137632981 | 137633081 | chr3 | 37245977 | 37246277 |
| chr5 | 137633730 | 137634681 | chr3 | 37332455 | 37332616 |
| chr5 | 137634830 | 137635181 | chr3 | 38492683 | 38493283 |
| chr5 | 137635330 | 137635430 | chr3 | 40219226 | 40219628 |
| chr5 | 137717304 | 137717504 | chr3 | 40257256 | 40257356 |
| chr5 | 137717754 | 137718054 | chr3 | 40311544 | 40311644 |

|      |           |           |      |          |          |
|------|-----------|-----------|------|----------|----------|
| chr5 | 137732970 | 137733419 | chr3 | 40358149 | 40358249 |
| chr5 | 137803793 | 137803993 | chr3 | 40405471 | 40405571 |
| chr5 | 137946336 | 137946836 | chr3 | 40460325 | 40460825 |
| chr5 | 137959847 | 137960047 | chr3 | 40461874 | 40461974 |
| chr5 | 137968260 | 137968763 | chr3 | 49956886 | 49957037 |
| chr5 | 137986370 | 137986519 | chr3 | 50742361 | 50742610 |
| chr5 | 138138813 | 138138962 | chr3 | 50744367 | 50744816 |
| chr5 | 138155399 | 138155548 | chr3 | 50916473 | 50916573 |
| chr5 | 138169805 | 138169905 | chr3 | 50928470 | 50928819 |
| chr5 | 138171205 | 138171305 | chr3 | 51081087 | 51081287 |
| chr5 | 138171454 | 138171505 | chr3 | 51378001 | 51378154 |
| chr5 | 138185397 | 138185680 | chr3 | 51787588 | 51787688 |
| chr5 | 138223621 | 138223921 | chr3 | 52983331 | 52983531 |
| chr5 | 138264336 | 138264787 | chr3 | 53176499 | 53176848 |
| chr5 | 138264838 | 138265438 | chr3 | 53383187 | 53383736 |
| chr5 | 138265687 | 138265987 | chr3 | 53675918 | 53676118 |
| chr5 | 138299131 | 138300231 | chr3 | 53676267 | 53676398 |
| chr5 | 138439690 | 138440990 | chr3 | 54275850 | 54275901 |
| chr5 | 138615527 | 138615776 | chr3 | 54574770 | 54574870 |
| chr5 | 138824688 | 138824837 | chr3 | 54575619 | 54575719 |
| chr5 | 138832638 | 138832738 | chr3 | 54762542 | 54762742 |
| chr5 | 138844981 | 138845834 | chr3 | 57255780 | 57256229 |
| chr5 | 138846781 | 138847230 | chr3 | 57367601 | 57368001 |
| chr5 | 138925024 | 138925673 | chr3 | 58045679 | 58045879 |
| chr5 | 138931618 | 138932618 | chr3 | 58622287 | 58622743 |
| chr5 | 139452765 | 139452865 | chr3 | 60522209 | 60522309 |
| chr5 | 139694971 | 139695171 | chr3 | 60522458 | 60522609 |
| chr5 | 139828406 | 139828806 | chr3 | 63448949 | 63449449 |
| chr5 | 139950340 | 139950540 | chr3 | 63484148 | 63484397 |
| chr5 | 140005485 | 140005734 | chr3 | 64912568 | 64912725 |
| chr5 | 140042932 | 140043481 | chr3 | 65047761 | 65048061 |
| chr5 | 140074962 | 140075319 | chr3 | 65478283 | 65478683 |
| chr5 | 140076928 | 140077677 | chr3 | 66501486 | 66501935 |
| chr5 | 140087767 | 140088520 | chr3 | 66948529 | 66948829 |
| chr5 | 140120744 | 140120944 | chr3 | 66949937 | 66950037 |
| chr5 | 140184251 | 140184500 | chr3 | 66950186 | 66950486 |
| chr5 | 140433768 | 140434017 | chr3 | 67102182 | 67102982 |
| chr5 | 140606825 | 140606925 | chr3 | 68092029 | 68092778 |
| chr5 | 141030904 | 141031104 | chr3 | 68524486 | 68525054 |
| chr5 | 141088184 | 141088833 | chr3 | 68525105 | 68525205 |
| chr5 | 141204961 | 141205110 | chr3 | 68526172 | 68526272 |
| chr5 | 141304800 | 141306500 | chr3 | 68564375 | 68564475 |
| chr5 | 141422460 | 141422760 | chr3 | 72576758 | 72577707 |

|      |           |           |      |          |          |
|------|-----------|-----------|------|----------|----------|
| chr5 | 141699675 | 141699975 | chr3 | 75078604 | 75078704 |
| chr5 | 143161713 | 143161913 | chr3 | 75595114 | 75595263 |
| chr5 | 143163164 | 143163264 | chr3 | 79113525 | 79113674 |
| chr5 | 143523719 | 143523819 | chr3 | 79365079 | 79365528 |
| chr5 | 143581345 | 143581545 | chr3 | 80435241 | 80435690 |
| chr5 | 143673912 | 143674012 | chr3 | 80558432 | 80558632 |
| chr5 | 144164542 | 144165191 | chr3 | 82070103 | 82070252 |
| chr5 | 144739154 | 144739403 | chr3 | 82426091 | 82426240 |
| chr5 | 144740854 | 144740954 | chr3 | 83562203 | 83562403 |
| chr5 | 144816934 | 144817134 | chr3 | 85409559 | 85409659 |
| chr5 | 144889144 | 144889444 | chr3 | 85523908 | 85524308 |
| chr5 | 145139983 | 145140440 | chr3 | 85524457 | 85524757 |
| chr5 | 145164903 | 145165152 | chr3 | 85525726 | 85525826 |
| chr5 | 145813830 | 145813930 | chr3 | 85745606 | 85745806 |
| chr5 | 146350928 | 146351328 | chr3 | 85746755 | 85746955 |
| chr5 | 146382040 | 146382440 | chr3 | 87139367 | 87139716 |
| chr5 | 147543781 | 147544081 | chr3 | 87427801 | 87428201 |
| chr5 | 147606812 | 147607012 | chr3 | 87452031 | 87452280 |
| chr5 | 147896707 | 147896807 | chr3 | 87470409 | 87470558 |
| chr5 | 147897556 | 147897756 | chr3 | 87521647 | 87521847 |
| chr5 | 148389243 | 148389492 | chr3 | 87522096 | 87522157 |
| chr5 | 148390343 | 148390692 | chr3 | 87580412 | 87580561 |
| chr5 | 148634643 | 148635043 | chr3 | 87856099 | 87856399 |
| chr5 | 148635292 | 148635392 | chr3 | 87886855 | 87886955 |
| chr5 | 149040291 | 149040640 | chr3 | 87900116 | 87900216 |
| chr5 | 149713783 | 149714435 | chr3 | 87978445 | 87978845 |
| chr5 | 149865885 | 149866336 | chr3 | 87978896 | 87979045 |
| chr5 | 150530546 | 150530846 | chr3 | 88074932 | 88075633 |
| chr5 | 150747676 | 150747976 | chr3 | 88142463 | 88142963 |
| chr5 | 151354445 | 151354745 | chr3 | 88207634 | 88208183 |
| chr5 | 151859345 | 151859894 | chr3 | 88682023 | 88682123 |
| chr5 | 152002048 | 152002148 | chr3 | 88686701 | 88686801 |
| chr4 | 3501905   | 3502254   | chr3 | 88704790 | 88704890 |
| chr4 | 3762696   | 3762796   | chr3 | 88705341 | 88705590 |
| chr4 | 3946310   | 3946559   | chr3 | 88748968 | 88749217 |
| chr4 | 6292667   | 6292767   | chr3 | 88801207 | 88801258 |
| chr4 | 6293116   | 6293216   | chr3 | 88801407 | 88801507 |
| chr4 | 8166537   | 8167337   | chr3 | 88802858 | 88803007 |
| chr4 | 8460994   | 8461143   | chr3 | 88859521 | 88859633 |
| chr4 | 9770118   | 9770418   | chr3 | 88915120 | 88915420 |
| chr4 | 11118949  | 11119249  | chr3 | 88915769 | 88915869 |
| chr4 | 11893916  | 11894016  | chr3 | 89237276 | 89237425 |
| chr4 | 14791500  | 14791749  | chr3 | 89295782 | 89295882 |

|      |          |          |      |           |           |
|------|----------|----------|------|-----------|-----------|
| chr4 | 15076210 | 15076717 | chr3 | 89434959  | 89435059  |
| chr4 | 16090496 | 16090996 | chr3 | 89574719  | 89574919  |
| chr4 | 19502059 | 19502308 | chr3 | 89735264  | 89735613  |
| chr4 | 19935509 | 19935609 | chr3 | 89753774  | 89754023  |
| chr4 | 20541876 | 20542176 | chr3 | 89765778  | 89765878  |
| chr4 | 22252039 | 22252239 | chr3 | 89787538  | 89787838  |
| chr4 | 22253090 | 22253190 | chr3 | 89955053  | 89955502  |
| chr4 | 25006440 | 25006996 | chr3 | 89998331  | 89998480  |
| chr4 | 25563716 | 25563816 | chr3 | 90121998  | 90122098  |
| chr4 | 26110465 | 26110665 | chr3 | 90124435  | 90124637  |
| chr4 | 31809807 | 31809907 | chr3 | 91928807  | 91928965  |
| chr4 | 32459149 | 32459308 | chr3 | 93076704  | 93077604  |
| chr4 | 32461105 | 32461305 | chr3 | 93077753  | 93077804  |
| chr4 | 32796312 | 32796412 | chr3 | 94180946  | 94181095  |
| chr4 | 32908448 | 32908597 | chr3 | 94537178  | 94537702  |
| chr4 | 32908798 | 32908897 | chr3 | 94628898  | 94629047  |
| chr4 | 34392564 | 34392713 | chr3 | 94633285  | 94633734  |
| chr4 | 34393901 | 34394350 | chr3 | 94805698  | 94805847  |
| chr4 | 34862726 | 34863677 | chr3 | 94879362  | 94879462  |
| chr4 | 34864277 | 34864426 | chr3 | 94957067  | 94957216  |
| chr4 | 39946496 | 39947045 | chr3 | 95180977  | 95181077  |
| chr4 | 39984263 | 39984912 | chr3 | 95209799  | 95210099  |
| chr4 | 40177374 | 40177723 | chr3 | 95210448  | 95210748  |
| chr4 | 40462915 | 40463066 | chr3 | 95378056  | 95378156  |
| chr4 | 40560042 | 40560744 | chr3 | 95404469  | 95404769  |
| chr4 | 40752865 | 40753165 | chr3 | 95405018  | 95405218  |
| chr4 | 40753314 | 40754014 | chr3 | 95742661  | 95743010  |
| chr4 | 41273188 | 41273388 | chr3 | 95767721  | 95767821  |
| chr4 | 41401936 | 41402585 | chr3 | 95818210  | 95818359  |
| chr4 | 41418400 | 41418700 | chr3 | 96158072  | 96158421  |
| chr4 | 41460860 | 41461109 | chr3 | 96219209  | 96219358  |
| chr4 | 41475908 | 41475996 | chr3 | 96250004  | 96250104  |
| chr4 | 41797944 | 41798037 | chr3 | 96338134  | 96338483  |
| chr4 | 41798288 | 41798737 | chr3 | 96351015  | 96351619  |
| chr4 | 42761322 | 42761871 | chr3 | 96351966  | 96352415  |
| chr4 | 42878347 | 42878559 | chr3 | 96427339  | 96427788  |
| chr4 | 42878908 | 42879210 | chr3 | 97132380  | 97132480  |
| chr4 | 43004578 | 43005027 | chr3 | 97180552  | 97180652  |
| chr4 | 43050896 | 43050996 | chr3 | 97290455  | 97290704  |
| chr4 | 43384625 | 43386425 | chr3 | 97744005  | 97744105  |
| chr4 | 43386974 | 43387074 | chr3 | 98726777  | 98727072  |
| chr4 | 43433478 | 43433827 | chr3 | 98732960  | 98733160  |
| chr4 | 43458907 | 43459056 | chr3 | 100163830 | 100164030 |

|      |          |          |      |           |           |
|------|----------|----------|------|-----------|-----------|
| chr4 | 43497882 | 43498031 | chr3 | 100400999 | 100401656 |
| chr4 | 43503874 | 43504223 | chr3 | 100589600 | 100590200 |
| chr4 | 43511250 | 43511999 | chr3 | 101083694 | 101083894 |
| chr4 | 43528985 | 43529100 | chr3 | 101376604 | 101376806 |
| chr4 | 43635978 | 43636178 | chr3 | 101376955 | 101377112 |
| chr4 | 43659965 | 43660065 | chr3 | 101553903 | 101554001 |
| chr4 | 43673903 | 43674006 | chr3 | 102213254 | 102213554 |
| chr4 | 43674155 | 43674455 | chr3 | 102650436 | 102650885 |
| chr4 | 43701664 | 43702364 | chr3 | 102758277 | 102758377 |
| chr4 | 43711859 | 43712359 | chr3 | 103053665 | 103054514 |
| chr4 | 43734677 | 43735026 | chr3 | 103288012 | 103288361 |
| chr4 | 43826631 | 43827532 | chr3 | 103699361 | 103699461 |
| chr4 | 43842714 | 43843014 | chr3 | 103845098 | 103845256 |
| chr4 | 43858935 | 43859184 | chr3 | 103990490 | 103990790 |
| chr4 | 43960594 | 43960794 | chr3 | 104117168 | 104117268 |
| chr4 | 43962394 | 43962794 | chr3 | 104266739 | 104266839 |
| chr4 | 43987854 | 43987954 | chr3 | 104438989 | 104439189 |
| chr4 | 44017627 | 44017776 | chr3 | 104439838 | 104440289 |
| chr4 | 44761311 | 44761660 | chr3 | 104530526 | 104530775 |
| chr4 | 44985103 | 44986154 | chr3 | 104929315 | 104929715 |
| chr4 | 45016476 | 45016676 | chr3 | 105381016 | 105381120 |
| chr4 | 45016825 | 45017025 | chr3 | 105439377 | 105439928 |
| chr4 | 45346584 | 45346684 | chr3 | 105451381 | 105451781 |
| chr4 | 45687232 | 45687781 | chr3 | 106025106 | 106025206 |
| chr4 | 46063709 | 46063858 | chr3 | 106579246 | 106579546 |
| chr4 | 46063909 | 46064058 | chr3 | 107072310 | 107072810 |
| chr4 | 46144475 | 46144624 | chr3 | 107238198 | 107238398 |
| chr4 | 46572598 | 46572898 | chr3 | 107373933 | 107374182 |
| chr4 | 46579487 | 46580136 | chr3 | 107423114 | 107423214 |
| chr4 | 47357249 | 47357349 | chr3 | 107496953 | 107497153 |
| chr4 | 48129662 | 48129762 | chr3 | 107563907 | 107564356 |
| chr4 | 48284066 | 48284515 | chr3 | 107623394 | 107623843 |
| chr4 | 48545499 | 48545599 | chr3 | 107664263 | 107664314 |
| chr4 | 48666349 | 48666553 | chr3 | 107664463 | 107664563 |
| chr4 | 48667500 | 48667700 | chr3 | 107688214 | 107688314 |
| chr4 | 49602196 | 49602396 | chr3 | 107704028 | 107704179 |
| chr4 | 49603947 | 49604405 | chr3 | 107704328 | 107704528 |
| chr4 | 52599217 | 52599368 | chr3 | 107735139 | 107735239 |
| chr4 | 52916387 | 52916485 | chr3 | 108039859 | 108040008 |
| chr4 | 52917636 | 52918036 | chr3 | 108068696 | 108068896 |
| chr4 | 53015367 | 53015721 | chr3 | 108599684 | 108599777 |
| chr4 | 53016367 | 53016567 | chr3 | 108601028 | 108601177 |
| chr4 | 53164036 | 53164185 | chr3 | 109050987 | 109052236 |

|      |          |          |      |           |           |
|------|----------|----------|------|-----------|-----------|
| chr4 | 53275176 | 53276225 | chr3 | 112952042 | 112952699 |
| chr4 | 53445649 | 53445749 | chr3 | 113007678 | 113008378 |
| chr4 | 55536810 | 55537759 | chr3 | 113443556 | 113444105 |
| chr4 | 56674986 | 56675386 | chr3 | 113444356 | 113445005 |
| chr4 | 56733949 | 56734049 | chr3 | 115421310 | 115421459 |
| chr4 | 56879063 | 56879163 | chr3 | 115421510 | 115421659 |
| chr4 | 57498237 | 57498337 | chr3 | 115921791 | 115921991 |
| chr4 | 57498687 | 57498886 | chr3 | 116007839 | 116008545 |
| chr4 | 57784249 | 57784498 | chr3 | 116008794 | 116008894 |
| chr4 | 57847554 | 57847803 | chr3 | 116076331 | 116076531 |
| chr4 | 58217900 | 58218113 | chr3 | 116126061 | 116126261 |
| chr4 | 58485811 | 58486060 | chr3 | 116274023 | 116274572 |
| chr4 | 58844264 | 58844364 | chr3 | 116988931 | 116989131 |
| chr4 | 58934788 | 58935137 | chr3 | 120705929 | 120706080 |
| chr4 | 59737741 | 59737790 | chr3 | 120839009 | 120839102 |
| chr4 | 62196155 | 62196604 | chr3 | 121056685 | 121057285 |
| chr4 | 62361407 | 62361556 | chr3 | 121136867 | 121137167 |
| chr4 | 62393855 | 62394304 | chr3 | 121229277 | 121229681 |
| chr4 | 63007787 | 63008187 | chr3 | 121365238 | 121365489 |
| chr4 | 63049981 | 63050181 | chr3 | 121366638 | 121367138 |
| chr4 | 63051781 | 63051981 | chr3 | 121687745 | 121688594 |
| chr4 | 63198191 | 63198640 | chr3 | 122681258 | 122681758 |
| chr4 | 63215964 | 63216764 | chr3 | 122799762 | 122800115 |
| chr4 | 63269078 | 63269178 | chr3 | 125777065 | 125777565 |
| chr4 | 63331607 | 63331707 | chr3 | 126959563 | 126960012 |
| chr4 | 63333074 | 63333223 | chr3 | 127046469 | 127046769 |
| chr4 | 63333374 | 63333527 | chr3 | 127047218 | 127047418 |
| chr4 | 63380453 | 63380653 | chr3 | 128746034 | 128746334 |
| chr4 | 63380902 | 63381002 | chr3 | 128746483 | 128746783 |
| chr4 | 63394062 | 63394162 | chr3 | 129250150 | 129250506 |
| chr4 | 63396162 | 63396511 | chr3 | 129292346 | 129292446 |
| chr4 | 63580294 | 63580843 | chr3 | 129292895 | 129293046 |
| chr4 | 64959816 | 64960265 | chr3 | 129383969 | 129384181 |
| chr4 | 65440224 | 65441173 | chr3 | 129474770 | 129474970 |
| chr4 | 66240239 | 66240339 | chr3 | 130148353 | 130148604 |
| chr4 | 68789604 | 68789904 | chr3 | 130761869 | 130762065 |
| chr4 | 68790053 | 68790353 | chr3 | 130941317 | 130941466 |
| chr4 | 70370884 | 70370984 | chr3 | 130941517 | 130941717 |
| chr4 | 81263198 | 81263249 | chr3 | 130941866 | 130942073 |
| chr4 | 81263602 | 81264298 | chr3 | 132480523 | 132480723 |
| chr4 | 82841279 | 82841628 | chr3 | 132698237 | 132698637 |
| chr4 | 82843128 | 82843533 | chr3 | 132933539 | 132933739 |
| chr4 | 83238227 | 83238676 | chr3 | 134217147 | 134217447 |

|      |           |           |      |           |           |
|------|-----------|-----------|------|-----------|-----------|
| chr4 | 83478929  | 83479078  | chr3 | 134217596 | 134217996 |
| chr4 | 85026284  | 85026384  | chr3 | 134811823 | 134812023 |
| chr4 | 86161960  | 86162360  | chr3 | 134826699 | 134826799 |
| chr4 | 86677683  | 86677783  | chr3 | 136729183 | 136729332 |
| chr4 | 87853797  | 87853997  | chr3 | 137012125 | 137012725 |
| chr4 | 88260884  | 88261433  | chr3 | 137252639 | 137252739 |
| chr4 | 88543087  | 88543187  | chr3 | 137532278 | 137532527 |
| chr4 | 88601656  | 88602056  | chr3 | 137606500 | 137606652 |
| chr4 | 88956002  | 88956551  | chr3 | 141784108 | 141784208 |
| chr4 | 88957802  | 88958002  | chr3 | 141947985 | 141948139 |
| chr4 | 89115831  | 89115934  | chr3 | 142270981 | 142271081 |
| chr4 | 89131485  | 89131685  | chr3 | 143594182 | 143594313 |
| chr4 | 91213368  | 91213468  | chr3 | 143958869 | 143959069 |
| chr4 | 94893251  | 94893700  | chr3 | 144110565 | 144110720 |
| chr4 | 95419366  | 95419715  | chr3 | 144507141 | 144507341 |
| chr4 | 95808542  | 95808642  | chr3 | 145038523 | 145038774 |
| chr4 | 97618162  | 97618862  | chr3 | 145146368 | 145146668 |
| chr4 | 98237289  | 98237638  | chr3 | 145310919 | 145311176 |
| chr4 | 101495409 | 101495509 | chr3 | 145538836 | 145538936 |
| chr4 | 101562716 | 101563176 | chr3 | 145609775 | 145609975 |
| chr4 | 101741027 | 101741276 | chr3 | 145793028 | 145793128 |
| chr4 | 102606940 | 102607189 | chr3 | 145837483 | 145837583 |
| chr4 | 102961442 | 102961542 | chr3 | 145909802 | 145909902 |
| chr4 | 102963298 | 102963399 | chr3 | 146040554 | 146041454 |
| chr4 | 102966469 | 102966569 | chr3 | 151735030 | 151735479 |
| chr4 | 103062511 | 103062611 | chr3 | 152102441 | 152102990 |
| chr4 | 103161134 | 103161583 | chr3 | 152372209 | 152372301 |
| chr4 | 104215092 | 104215192 | chr3 | 153113924 | 153114024 |
| chr4 | 105002624 | 105002973 | chr3 | 153232788 | 153233237 |
| chr4 | 106407961 | 106408161 | chr3 | 153332474 | 153332674 |
| chr4 | 106464716 | 106464865 | chr3 | 153333223 | 153333831 |
| chr4 | 106498384 | 106498533 | chr3 | 155952142 | 155952242 |
| chr4 | 106646544 | 106646744 | chr2 | 3429936   | 3430485   |
| chr4 | 106915723 | 106915823 | chr2 | 5062395   | 5062595   |
| chr4 | 106942168 | 106942841 | chr2 | 5639733   | 5639833   |
| chr4 | 107026328 | 107026628 | chr2 | 5640833   | 5641184   |
| chr4 | 107153921 | 107154121 | chr2 | 5641336   | 5641446   |
| chr4 | 107154370 | 107154570 | chr2 | 6054666   | 6055215   |
| chr4 | 107215215 | 107215764 | chr2 | 6466595   | 6466695   |
| chr4 | 107647738 | 107648387 | chr2 | 9973966   | 9974066   |
| chr4 | 107671400 | 107671600 | chr2 | 10006161  | 10006461  |
| chr4 | 107671749 | 107672049 | chr2 | 11426968  | 11427068  |
| chr4 | 107770312 | 107771061 | chr2 | 11427617  | 11427717  |

|      |           |           |      |          |          |
|------|-----------|-----------|------|----------|----------|
| chr4 | 107815509 | 107815909 | chr2 | 11528300 | 11528749 |
| chr4 | 107879617 | 107879917 | chr2 | 11630941 | 11631041 |
| chr4 | 108012779 | 108012879 | chr2 | 11702577 | 11702777 |
| chr4 | 108147866 | 108148166 | chr2 | 12344361 | 12344910 |
| chr4 | 108148315 | 108148615 | chr2 | 12848124 | 12848276 |
| chr4 | 108306612 | 108306912 | chr2 | 12849224 | 12849373 |
| chr4 | 108467482 | 108467682 | chr2 | 12849624 | 12849773 |
| chr4 | 109082309 | 109082709 | chr2 | 13469565 | 13469665 |
| chr4 | 109083163 | 109083358 | chr2 | 13719269 | 13719369 |
| chr4 | 109253976 | 109254176 | chr2 | 13999711 | 14000060 |
| chr4 | 109254625 | 109254825 | chr2 | 14530076 | 14530176 |
| chr4 | 109324033 | 109324440 | chr2 | 14980561 | 14980661 |
| chr4 | 109523704 | 109523804 | chr2 | 16280921 | 16281170 |
| chr4 | 111262283 | 111262583 | chr2 | 16282081 | 16282281 |
| chr4 | 114773240 | 114773540 | chr2 | 17656468 | 17656817 |
| chr4 | 114904804 | 114904960 | chr2 | 18601319 | 18601419 |
| chr4 | 114906707 | 114906907 | chr2 | 18602768 | 18602968 |
| chr4 | 115494483 | 115494732 | chr2 | 19370862 | 19370962 |
| chr4 | 115675538 | 115675589 | chr2 | 19478910 | 19479159 |
| chr4 | 115786904 | 115787104 | chr2 | 22632124 | 22632386 |
| chr4 | 115901656 | 115901805 | chr2 | 22755124 | 22755373 |
| chr4 | 115922755 | 115922855 | chr2 | 24364546 | 24364846 |
| chr4 | 116310726 | 116310926 | chr2 | 24652634 | 24652734 |
| chr4 | 116533076 | 116533325 | chr2 | 24808678 | 24808879 |
| chr4 | 116654537 | 116654986 | chr2 | 24838532 | 24838732 |
| chr4 | 117529103 | 117529452 | chr2 | 24942909 | 24943309 |
| chr4 | 117681335 | 117681635 | chr2 | 25131143 | 25131243 |
| chr4 | 117682684 | 117682884 | chr2 | 25151553 | 25151753 |
| chr4 | 117731303 | 117732696 | chr2 | 25162129 | 25162329 |
| chr4 | 117734356 | 117734556 | chr2 | 25163078 | 25163378 |
| chr4 | 117776790 | 117777290 | chr2 | 25176977 | 25177077 |
| chr4 | 117983468 | 117983917 | chr2 | 25254457 | 25254806 |
| chr4 | 117983968 | 117984117 | chr2 | 25318149 | 25318249 |
| chr4 | 118221825 | 118222225 | chr2 | 25345273 | 25346122 |
| chr4 | 118224174 | 118224283 | chr2 | 25389908 | 25390757 |
| chr4 | 118275170 | 118275619 | chr2 | 25435874 | 25436274 |
| chr4 | 118285327 | 118285576 | chr2 | 25468730 | 25469379 |
| chr4 | 118336839 | 118337388 | chr2 | 25499077 | 25499226 |
| chr4 | 118373952 | 118374152 | chr2 | 25593909 | 25594062 |
| chr4 | 118390606 | 118391155 | chr2 | 26095736 | 26096036 |
| chr4 | 118392355 | 118392755 | chr2 | 26126500 | 26126600 |
| chr4 | 118537228 | 118537528 | chr2 | 26269650 | 26269799 |
| chr4 | 119038203 | 119038507 | chr2 | 26298168 | 26298268 |



|      |           |           |      |          |          |
|------|-----------|-----------|------|----------|----------|
| chr4 | 119064995 | 119065095 | chr2 | 26298419 | 26298568 |
| chr4 | 119066595 | 119066695 | chr2 | 26393917 | 26394317 |
| chr4 | 119142017 | 119142917 | chr2 | 26468913 | 26469062 |
| chr4 | 119167357 | 119167506 | chr2 | 26473148 | 26473248 |
| chr4 | 119340103 | 119340254 | chr2 | 26492741 | 26492841 |
| chr4 | 119340603 | 119340811 | chr2 | 26493890 | 26494091 |
| chr4 | 119483306 | 119483655 | chr2 | 26799637 | 26799737 |
| chr4 | 119661702 | 119662046 | chr2 | 26805151 | 26805351 |
| chr4 | 120008756 | 120009056 | chr2 | 26968560 | 26968860 |
| chr4 | 120135485 | 120135785 | chr2 | 27375983 | 27376083 |
| chr4 | 120725143 | 120725343 | chr2 | 27774915 | 27775316 |
| chr4 | 120725692 | 120725892 | chr2 | 27975209 | 27975658 |
| chr4 | 120864571 | 120864671 | chr2 | 28094419 | 28094620 |
| chr4 | 122687137 | 122687386 | chr2 | 28335571 | 28335671 |
| chr4 | 122812953 | 122813202 | chr2 | 28452593 | 28453442 |
| chr4 | 122814753 | 122815306 | chr2 | 28589994 | 28590094 |
| chr4 | 122956653 | 122957053 | chr2 | 29507306 | 29507799 |
| chr4 | 122966990 | 122967790 | chr2 | 29716619 | 29716768 |
| chr4 | 123035286 | 123035635 | chr2 | 29756773 | 29757075 |
| chr4 | 123086087 | 123086387 | chr2 | 29758873 | 29758973 |
| chr4 | 123134199 | 123135211 | chr2 | 29937756 | 29937956 |
| chr4 | 123176748 | 123176899 | chr2 | 30126499 | 30126699 |
| chr4 | 123177248 | 123177299 | chr2 | 30248411 | 30248630 |
| chr4 | 123177448 | 123177748 | chr2 | 30281146 | 30281246 |
| chr4 | 123639456 | 123639856 | chr2 | 30305429 | 30305529 |
| chr4 | 124594261 | 124594510 | chr2 | 30483274 | 30483523 |
| chr4 | 124654655 | 124654855 | chr2 | 30697067 | 30697467 |
| chr4 | 124702063 | 124702164 | chr2 | 30856422 | 30856522 |
| chr4 | 124838213 | 124838313 | chr2 | 30856671 | 30857175 |
| chr4 | 124937269 | 124937369 | chr2 | 30871117 | 30871317 |
| chr4 | 124979524 | 124980073 | chr2 | 30871466 | 30871566 |
| chr4 | 125998186 | 125999186 | chr2 | 31041264 | 31041413 |
| chr4 | 126014310 | 126014610 | chr2 | 31358949 | 31359149 |
| chr4 | 126114688 | 126114837 | chr2 | 31461696 | 31462096 |
| chr4 | 126138992 | 126139092 | chr2 | 31734497 | 31734597 |
| chr4 | 126320405 | 126320505 | chr2 | 31774711 | 31774960 |
| chr4 | 126384924 | 126385124 | chr2 | 31839133 | 31839433 |
| chr4 | 126409122 | 126409422 | chr2 | 31839582 | 31839782 |
| chr4 | 126588241 | 126588441 | chr2 | 31972436 | 31972536 |
| chr4 | 126603738 | 126603838 | chr2 | 31983184 | 31983384 |
| chr4 | 126604487 | 126605038 | chr2 | 31983833 | 31983942 |
| chr4 | 127020554 | 127020654 | chr2 | 31984584 | 31985133 |
| chr4 | 127166462 | 127166711 | chr2 | 32149341 | 32150092 |

|      |           |           |      |          |          |
|------|-----------|-----------|------|----------|----------|
| chr4 | 127205865 | 127207065 | chr2 | 32176544 | 32176949 |
| chr4 | 127209848 | 127209997 | chr2 | 32177701 | 32178001 |
| chr4 | 127210948 | 127211248 | chr2 | 32242053 | 32242153 |
| chr4 | 127211997 | 127212197 | chr2 | 32270964 | 32271164 |
| chr4 | 128556328 | 128557428 | chr2 | 32276270 | 32276470 |
| chr4 | 128843548 | 128843648 | chr2 | 32284916 | 32285016 |
| chr4 | 128987843 | 128988292 | chr2 | 32423689 | 32424089 |
| chr4 | 128988443 | 128988643 | chr2 | 32488139 | 32488388 |
| chr4 | 128989292 | 128989597 | chr2 | 32495491 | 32495891 |
| chr4 | 129140056 | 129140260 | chr2 | 32516983 | 32517583 |
| chr4 | 129292724 | 129293732 | chr2 | 32736406 | 32736506 |
| chr4 | 129294475 | 129294924 | chr2 | 32764855 | 32765704 |
| chr4 | 129365727 | 129366027 | chr2 | 32848756 | 32848905 |
| chr4 | 129394930 | 129395587 | chr2 | 32850356 | 32851205 |
| chr4 | 129472754 | 129473103 | chr2 | 32870587 | 32870687 |
| chr4 | 129492424 | 129492724 | chr2 | 32870936 | 32871436 |
| chr4 | 129492973 | 129493073 | chr2 | 33105348 | 33105548 |
| chr4 | 129524984 | 129525084 | chr2 | 33357063 | 33357612 |
| chr4 | 129548771 | 129548871 | chr2 | 33776926 | 33777431 |
| chr4 | 129691509 | 129691710 | chr2 | 34660425 | 34660725 |
| chr4 | 129842251 | 129843351 | chr2 | 34661474 | 34661574 |
| chr4 | 129899271 | 129899773 | chr2 | 34760053 | 34760402 |
| chr4 | 129990846 | 129990946 | chr2 | 34802607 | 34802807 |
| chr4 | 129991395 | 129992095 | chr2 | 35350059 | 35350408 |
| chr4 | 129992946 | 129993146 | chr2 | 35350759 | 35351408 |
| chr4 | 130237836 | 130238085 | chr2 | 35580324 | 35581024 |
| chr4 | 130269760 | 130269860 | chr2 | 35939403 | 35939952 |
| chr4 | 130631531 | 130632031 | chr2 | 35994002 | 35994651 |
| chr4 | 130749018 | 130749118 | chr2 | 36027397 | 36027549 |
| chr4 | 130783726 | 130784526 | chr2 | 37331715 | 37332264 |
| chr4 | 131913100 | 131913200 | chr2 | 37333315 | 37333691 |
| chr4 | 132350259 | 132351064 | chr2 | 38239839 | 38239939 |
| chr4 | 132375217 | 132375317 | chr2 | 38400430 | 38400530 |
| chr4 | 132478900 | 132479049 | chr2 | 38897520 | 38897620 |
| chr4 | 132573950 | 132574249 | chr2 | 39115119 | 39115621 |
| chr4 | 132606114 | 132606214 | chr2 | 48702487 | 48702787 |
| chr4 | 132606563 | 132606665 | chr2 | 48837965 | 48838265 |
| chr4 | 132761865 | 132762165 | chr2 | 49340152 | 49340252 |
| chr4 | 132968897 | 132969546 | chr2 | 50016800 | 50016949 |
| chr4 | 133080471 | 133081020 | chr2 | 50185708 | 50185857 |
| chr4 | 133178359 | 133178459 | chr2 | 51861921 | 51862470 |
| chr4 | 133208431 | 133208631 | chr2 | 52448298 | 52448847 |
| chr4 | 133209584 | 133209684 | chr2 | 52637808 | 52638208 |

|      |           |           |      |          |          |
|------|-----------|-----------|------|----------|----------|
| chr4 | 133319590 | 133319890 | chr2 | 53974488 | 53974588 |
| chr4 | 133320239 | 133320339 | chr2 | 53974737 | 53974988 |
| chr4 | 133392843 | 133393443 | chr2 | 54325522 | 54325622 |
| chr4 | 133422133 | 133422233 | chr2 | 57127781 | 57128381 |
| chr4 | 133422806 | 133423857 | chr2 | 60000515 | 60000964 |
| chr4 | 133443011 | 133443513 | chr2 | 60085388 | 60085588 |
| chr4 | 133512074 | 133512174 | chr2 | 61452560 | 61452810 |
| chr4 | 133808294 | 133808794 | chr2 | 61586993 | 61587293 |
| chr4 | 133840918 | 133841918 | chr2 | 63973470 | 63973670 |
| chr4 | 133842079 | 133842475 | chr2 | 64897541 | 64897641 |
| chr4 | 133941961 | 133942061 | chr2 | 64898090 | 64898490 |
| chr4 | 133968107 | 133968207 | chr2 | 68347405 | 68347505 |
| chr4 | 134066722 | 134066871 | chr2 | 68457196 | 68457445 |
| chr4 | 134087182 | 134087231 | chr2 | 68736531 | 68736631 |
| chr4 | 134183052 | 134183201 | chr2 | 69522261 | 69522610 |
| chr4 | 134237022 | 134237222 | chr2 | 69588381 | 69588730 |
| chr4 | 134308064 | 134308164 | chr2 | 70163316 | 70163416 |
| chr4 | 134382910 | 134383159 | chr2 | 70437487 | 70437587 |
| chr4 | 134544493 | 134545093 | chr2 | 70536750 | 70536850 |
| chr4 | 134607301 | 134607401 | chr2 | 70701204 | 70701304 |
| chr4 | 134607950 | 134608150 | chr2 | 70930727 | 70930927 |
| chr4 | 134608701 | 134608950 | chr2 | 70931276 | 70931576 |
| chr4 | 134609401 | 134609550 | chr2 | 71087499 | 71087651 |
| chr4 | 134702337 | 134702537 | chr2 | 71404335 | 71404535 |
| chr4 | 134702899 | 134703086 | chr2 | 71421865 | 71422065 |
| chr4 | 134763393 | 134763493 | chr2 | 71662057 | 71662157 |
| chr4 | 134763642 | 134763842 | chr2 | 71856261 | 71856461 |
| chr4 | 135193339 | 135193439 | chr2 | 72351193 | 72351793 |
| chr4 | 135238024 | 135238524 | chr2 | 72853406 | 72854106 |
| chr4 | 135239328 | 135239728 | chr2 | 73089671 | 73089771 |
| chr4 | 135265175 | 135266175 | chr2 | 73146604 | 73146904 |
| chr4 | 135465672 | 135465772 | chr2 | 73404834 | 73405234 |
| chr4 | 135566088 | 135566388 | chr2 | 73536744 | 73537000 |
| chr4 | 135568237 | 135568337 | chr2 | 73786522 | 73786622 |
| chr4 | 135693912 | 135694012 | chr2 | 74453719 | 74453819 |
| chr4 | 135694461 | 135695312 | chr2 | 74454068 | 74454168 |
| chr4 | 135760610 | 135760810 | chr2 | 74543121 | 74543321 |
| chr4 | 135803718 | 135803967 | chr2 | 74556216 | 74556316 |
| chr4 | 135812297 | 135812397 | chr2 | 74557367 | 74557467 |
| chr4 | 135826948 | 135827748 | chr2 | 74557816 | 74558116 |
| chr4 | 136087333 | 136087633 | chr2 | 74573286 | 74573337 |
| chr4 | 136087982 | 136088033 | chr2 | 74701125 | 74701225 |
| chr4 | 136262877 | 136263177 | chr2 | 75707166 | 75707366 |

|      |           |           |      |          |          |
|------|-----------|-----------|------|----------|----------|
| chr4 | 136263326 | 136263626 | chr2 | 75856993 | 75857293 |
| chr4 | 136301507 | 136301707 | chr2 | 76235772 | 76235872 |
| chr4 | 136448590 | 136448790 | chr2 | 76243442 | 76243642 |
| chr4 | 136449439 | 136449644 | chr2 | 76522769 | 76522969 |
| chr4 | 136726231 | 136726588 | chr2 | 76857522 | 76858072 |
| chr4 | 136738014 | 136738963 | chr2 | 78747721 | 78748021 |
| chr4 | 137271296 | 137272045 | chr2 | 80194963 | 80195063 |
| chr4 | 137496536 | 137496838 | chr2 | 80195612 | 80195718 |
| chr4 | 137635677 | 137635826 | chr2 | 80326371 | 80326620 |
| chr4 | 137701650 | 137701950 | chr2 | 83604254 | 83604354 |
| chr4 | 137831672 | 137831872 | chr2 | 83691902 | 83692402 |
| chr4 | 138144091 | 138144291 | chr2 | 83692551 | 83692651 |
| chr4 | 138165774 | 138165874 | chr2 | 84353801 | 84353898 |
| chr4 | 138274125 | 138274325 | chr2 | 84557999 | 84558148 |
| chr4 | 138564499 | 138564848 | chr2 | 84594765 | 84594865 |
| chr4 | 138565899 | 138565948 | chr2 | 84655279 | 84655728 |
| chr4 | 138658464 | 138658713 | chr2 | 84915146 | 84915303 |
| chr4 | 138660264 | 138660513 | chr2 | 85828839 | 85828997 |
| chr4 | 138716595 | 138717044 | chr2 | 86255585 | 86255941 |
| chr4 | 138805657 | 138805857 | chr2 | 86770148 | 86770297 |
| chr4 | 138933368 | 138933868 | chr2 | 86974470 | 86974632 |
| chr4 | 139151951 | 139152246 | chr2 | 88778370 | 88778532 |
| chr4 | 139493191 | 139493740 | chr2 | 90624744 | 90625144 |
| chr4 | 139673071 | 139673271 | chr2 | 90726331 | 90726831 |
| chr4 | 139807396 | 139807896 | chr2 | 90915314 | 90915414 |
| chr4 | 140086987 | 140087287 | chr2 | 90949496 | 90949896 |
| chr4 | 140488353 | 140488404 | chr2 | 90975171 | 90975271 |
| chr4 | 140489053 | 140489153 | chr2 | 91074740 | 91074840 |
| chr4 | 140582219 | 140582719 | chr2 | 91337524 | 91337624 |
| chr4 | 140615139 | 140615595 | chr2 | 91515389 | 91515638 |
| chr4 | 140685032 | 140685232 | chr2 | 91515689 | 91515838 |
| chr4 | 140744180 | 140744532 | chr2 | 91531682 | 91531982 |
| chr4 | 140745180 | 140745329 | chr2 | 91532431 | 91532531 |
| chr4 | 140799473 | 140799773 | chr2 | 91609471 | 91609671 |
| chr4 | 140801324 | 140801473 | chr2 | 91811223 | 91811937 |
| chr4 | 140826725 | 140826925 | chr2 | 91903855 | 91904055 |
| chr4 | 140848756 | 140849498 | chr2 | 91904916 | 91905016 |
| chr4 | 140894264 | 140894915 | chr2 | 92093123 | 92093272 |
| chr4 | 140918888 | 140919047 | chr2 | 92261092 | 92261292 |
| chr4 | 141238802 | 141239553 | chr2 | 92313652 | 92313752 |
| chr4 | 141259357 | 141259657 | chr2 | 92338765 | 92339165 |
| chr4 | 141362685 | 141362785 | chr2 | 92339816 | 92339916 |
| chr4 | 141363034 | 141363534 | chr2 | 92794924 | 92795024 |

|      |           |           |      |           |           |
|------|-----------|-----------|------|-----------|-----------|
| chr4 | 141458687 | 141458936 | chr2 | 93066958  | 93067058  |
| chr4 | 141463088 | 141463288 | chr2 | 93341471  | 93341571  |
| chr4 | 141463737 | 141463949 | chr2 | 93342520  | 93342920  |
| chr4 | 141464788 | 141464888 | chr2 | 93745040  | 93745340  |
| chr4 | 141526515 | 141526878 | chr2 | 102280524 | 102280624 |
| chr4 | 141631814 | 141632263 | chr2 | 103302451 | 103302651 |
| chr4 | 141687460 | 141687960 | chr2 | 103445584 | 103445684 |
| chr4 | 141762729 | 141763029 | chr2 | 103849197 | 103849604 |
| chr4 | 143212031 | 143213031 | chr2 | 103907275 | 103907375 |
| chr4 | 145159789 | 145159938 | chr2 | 103907724 | 103907824 |
| chr4 | 145161189 | 145161343 | chr2 | 103949184 | 103949784 |
| chr4 | 146564533 | 146564733 | chr2 | 103974827 | 103975327 |
| chr4 | 147773376 | 147774379 | chr2 | 104373868 | 104373968 |
| chr4 | 147845312 | 147845512 | chr2 | 104591586 | 104591686 |
| chr4 | 147889714 | 147890214 | chr2 | 104729149 | 104729801 |
| chr4 | 147903463 | 147904012 | chr2 | 104896002 | 104896651 |
| chr4 | 147942785 | 147942885 | chr2 | 105103418 | 105103767 |
| chr4 | 148035465 | 148035765 | chr2 | 105278763 | 105278963 |
| chr4 | 148044707 | 148044807 | chr2 | 109770152 | 109770552 |
| chr4 | 148057342 | 148057991 | chr2 | 110477073 | 110477227 |
| chr4 | 148058042 | 148058091 | chr2 | 111134591 | 111135046 |
| chr4 | 148063085 | 148063385 | chr2 | 111171044 | 111171503 |
| chr4 | 148063835 | 148064285 | chr2 | 112140389 | 112140539 |
| chr4 | 148065134 | 148065334 | chr2 | 112145093 | 112145293 |
| chr4 | 148353198 | 148353298 | chr2 | 112258585 | 112258885 |
| chr4 | 148493930 | 148494279 | chr2 | 112334503 | 112334952 |
| chr4 | 148853589 | 148853689 | chr2 | 112360103 | 112360193 |
| chr4 | 149004379 | 149004580 | chr2 | 112372550 | 112372899 |
| chr4 | 149359435 | 149359842 | chr2 | 113637721 | 113637821 |
| chr4 | 149388201 | 149388304 | chr2 | 113708101 | 113708501 |
| chr4 | 149422345 | 149422545 | chr2 | 113708650 | 113708860 |
| chr4 | 149490004 | 149490755 | chr2 | 113710201 | 113710458 |
| chr4 | 149602707 | 149602807 | chr2 | 113973150 | 113973899 |
| chr4 | 149604507 | 149604607 | chr2 | 117209974 | 117210123 |
| chr4 | 149679905 | 149680054 | chr2 | 118236200 | 118236456 |
| chr4 | 149860724 | 149860973 | chr2 | 118439476 | 118440081 |
| chr4 | 149914441 | 149915390 | chr2 | 118621533 | 118621633 |
| chr4 | 149990782 | 149991682 | chr2 | 118623233 | 118623782 |
| chr4 | 150104743 | 150104843 | chr2 | 118885954 | 118886454 |
| chr4 | 150141273 | 150141373 | chr2 | 119072752 | 119073301 |
| chr4 | 150557492 | 150557641 | chr2 | 119127618 | 119127718 |
| chr4 | 150557792 | 150557992 | chr2 | 119132988 | 119133088 |
| chr4 | 150558441 | 150558541 | chr2 | 119133939 | 119134739 |

|      |           |           |      |           |           |
|------|-----------|-----------|------|-----------|-----------|
| chr4 | 150757508 | 150757608 | chr2 | 119168805 | 119169054 |
| chr4 | 150814272 | 150814421 | chr2 | 119230900 | 119231000 |
| chr4 | 150815772 | 150816121 | chr2 | 119285359 | 119285859 |
| chr4 | 150829283 | 150829884 | chr2 | 119311236 | 119311735 |
| chr4 | 150900414 | 150900514 | chr2 | 119437809 | 119438109 |
| chr4 | 150962420 | 150962520 | chr2 | 119507352 | 119507452 |
| chr4 | 151894115 | 151894365 | chr2 | 119507601 | 119507701 |
| chr4 | 151896480 | 151896580 | chr2 | 119701867 | 119701967 |
| chr4 | 151898280 | 151898829 | chr2 | 119719005 | 119719205 |
| chr4 | 151911508 | 151911757 | chr2 | 120312641 | 120312741 |
| chr4 | 151944008 | 151944108 | chr2 | 120423863 | 120424052 |
| chr4 | 152001485 | 152001585 | chr2 | 120527452 | 120528107 |
| chr4 | 152018351 | 152018651 | chr2 | 120930546 | 120930746 |
| chr4 | 152019200 | 152019251 | chr2 | 120937192 | 120937541 |
| chr4 | 152019500 | 152020351 | chr2 | 121372090 | 121372544 |
| chr4 | 152040343 | 152040792 | chr2 | 121416431 | 121416580 |
| chr4 | 152056125 | 152056225 | chr2 | 121915983 | 121916083 |
| chr4 | 152081751 | 152082153 | chr2 | 122146869 | 122147069 |
| chr4 | 152176879 | 152176979 | chr2 | 122257730 | 122257879 |
| chr4 | 152177328 | 152178679 | chr2 | 122589776 | 122590076 |
| chr4 | 152179028 | 152179228 | chr2 | 122662194 | 122662294 |
| chr4 | 152199968 | 152200117 | chr2 | 124569948 | 124570048 |
| chr4 | 152222526 | 152222626 | chr2 | 124570299 | 124570497 |
| chr4 | 152228760 | 152229063 | chr2 | 125111479 | 125111579 |
| chr4 | 152230411 | 152230511 | chr2 | 125207212 | 125207312 |
| chr4 | 152383459 | 152383808 | chr2 | 125207861 | 125207961 |
| chr4 | 153860403 | 153860503 | chr2 | 125632625 | 125633025 |
| chr4 | 153879827 | 153879927 | chr2 | 125992914 | 125993214 |
| chr4 | 153914869 | 153915180 | chr2 | 125994964 | 125995171 |
| chr4 | 154065251 | 154066293 | chr2 | 126512985 | 126513085 |
| chr4 | 154432949 | 154433949 | chr2 | 126579196 | 126579396 |
| chr4 | 154572102 | 154572500 | chr2 | 126637330 | 126637488 |
| chr4 | 154772053 | 154772253 | chr2 | 126836391 | 126836491 |
| chr4 | 154773902 | 154774502 | chr2 | 127028697 | 127029046 |
| chr4 | 154915249 | 154915349 | chr2 | 127207905 | 127208454 |
| chr4 | 154915700 | 154916400 | chr2 | 127296000 | 127296100 |
| chr4 | 154916549 | 154916849 | chr2 | 127296649 | 127296849 |
| chr4 | 155153755 | 155153955 | chr2 | 127298100 | 127298349 |
| chr4 | 155154604 | 155154804 | chr2 | 127481501 | 127482050 |
| chr4 | 155265858 | 155265958 | chr2 | 127501028 | 127501528 |
| chr4 | 155506043 | 155506192 | chr2 | 127616163 | 127616363 |
| chr4 | 155558602 | 155559002 | chr2 | 127689677 | 127689828 |
| chr3 | 7629854   | 7629903   | chr2 | 127748385 | 127748734 |

|      |          |          |      |           |           |
|------|----------|----------|------|-----------|-----------|
| chr3 | 8940799  | 8940899  | chr2 | 127791526 | 127792177 |
| chr3 | 9850847  | 9850947  | chr2 | 128647060 | 128647160 |
| chr3 | 9851098  | 9852098  | chr2 | 128658927 | 128659376 |
| chr3 | 9852852  | 9852947  | chr2 | 128822408 | 128822557 |
| chr3 | 10028073 | 10028273 | chr2 | 128823308 | 128823609 |
| chr3 | 10227119 | 10227268 | chr2 | 129026268 | 129026468 |
| chr3 | 10319013 | 10319309 | chr2 | 129158430 | 129158530 |
| chr3 | 10348840 | 10348989 | chr2 | 129256895 | 129257044 |
| chr3 | 10370142 | 10370441 | chr2 | 129498233 | 129498582 |
| chr3 | 10383540 | 10383689 | chr2 | 129970879 | 129971529 |
| chr3 | 10457404 | 10457504 | chr2 | 130060534 | 130060634 |
| chr3 | 14664629 | 14664778 | chr2 | 130139141 | 130139241 |
| chr3 | 14910265 | 14910367 | chr2 | 130233989 | 130234089 |
| chr3 | 19502934 | 19503034 | chr2 | 130234838 | 130234946 |
| chr3 | 19642729 | 19643278 | chr2 | 130254945 | 130255145 |
| chr3 | 19665959 | 19666120 | chr2 | 130366701 | 130366901 |
| chr3 | 26244550 | 26244601 | chr2 | 130589714 | 130590114 |
| chr3 | 26790074 | 26790223 | chr2 | 130799641 | 130800390 |
| chr3 | 27629728 | 27630528 | chr2 | 131086646 | 131087046 |
| chr3 | 28302847 | 28302947 | chr2 | 131119800 | 131120200 |
| chr3 | 28304396 | 28304896 | chr2 | 131193868 | 131194068 |
| chr3 | 28387681 | 28387781 | chr2 | 131222236 | 131222336 |
| chr3 | 28412081 | 28412181 | chr2 | 131451574 | 131451674 |
| chr3 | 29604435 | 29604584 | chr2 | 131868842 | 131869036 |
| chr3 | 30700892 | 30701092 | chr2 | 132537709 | 132537809 |
| chr3 | 30756845 | 30757445 | chr2 | 132741608 | 132741757 |
| chr3 | 31973889 | 31973989 | chr2 | 133513378 | 133513578 |
| chr3 | 32042471 | 32042671 | chr2 | 137075862 | 137076062 |
| chr3 | 32117358 | 32117558 | chr2 | 137077614 | 137077714 |
| chr3 | 32136552 | 32136904 | chr2 | 143023399 | 143023548 |
| chr3 | 32222430 | 32222530 | chr2 | 143506158 | 143506358 |
| chr3 | 32223079 | 32223782 | chr2 | 143822704 | 143822804 |
| chr3 | 32343406 | 32343706 | chr2 | 143874853 | 143874953 |
| chr3 | 32423720 | 32423820 | chr2 | 143992432 | 143992781 |
| chr3 | 34254858 | 34255158 | chr2 | 144230265 | 144230465 |
| chr3 | 34255407 | 34255907 | chr2 | 144230814 | 144230914 |
| chr3 | 35604854 | 35605003 | chr2 | 144293946 | 144294054 |
| chr3 | 35829370 | 35830519 | chr2 | 144487575 | 144487775 |
| chr3 | 36081493 | 36081793 | chr2 | 144488775 | 144489124 |
| chr3 | 36278998 | 36279453 | chr2 | 144516011 | 144516260 |
| chr3 | 36669263 | 36669563 | chr2 | 146181043 | 146181143 |
| chr3 | 37025492 | 37025592 | chr2 | 146471937 | 146472037 |
| chr3 | 37331355 | 37331504 | chr2 | 146972852 | 146973552 |

|      |          |          |      |           |           |
|------|----------|----------|------|-----------|-----------|
| chr3 | 38491734 | 38492034 | chr2 | 148355006 | 148355206 |
| chr3 | 38493534 | 38493683 | chr2 | 148367634 | 148368183 |
| chr3 | 40256307 | 40256407 | chr2 | 148632772 | 148633121 |
| chr3 | 40358398 | 40358498 | chr2 | 148709891 | 148710140 |
| chr3 | 40405820 | 40406020 | chr2 | 148780383 | 148780532 |
| chr3 | 44887934 | 44888236 | chr2 | 150999035 | 150999086 |
| chr3 | 50743216 | 50743816 | chr2 | 151532262 | 151532362 |
| chr3 | 50915924 | 50916324 | chr2 | 151592064 | 151592413 |
| chr3 | 51003930 | 51004130 | chr2 | 151802858 | 151802958 |
| chr3 | 51375699 | 51375799 | chr2 | 151869662 | 151869862 |
| chr3 | 51376948 | 51377552 | chr2 | 151870011 | 151870562 |
| chr3 | 51786288 | 51786442 | chr2 | 151933362 | 151933562 |
| chr3 | 52561361 | 52561661 | chr2 | 152103006 | 152103106 |
| chr3 | 53006707 | 53007356 | chr2 | 152186881 | 152187081 |
| chr3 | 53176999 | 53177148 | chr2 | 152253903 | 152254003 |
| chr3 | 54254599 | 54254699 | chr2 | 152303551 | 152304600 |
| chr3 | 54255748 | 54256058 | chr2 | 152358126 | 152358226 |
| chr3 | 54655312 | 54655553 | chr2 | 152374966 | 152375066 |
| chr3 | 54655702 | 54656307 | chr2 | 152532734 | 152533123 |
| chr3 | 54701358 | 54701658 | chr2 | 152539843 | 152540143 |
| chr3 | 56943373 | 56943530 | chr2 | 152540694 | 152540792 |
| chr3 | 57095291 | 57095491 | chr2 | 152586684 | 152586984 |
| chr3 | 57096240 | 57096340 | chr2 | 152629429 | 152629629 |
| chr3 | 57171306 | 57171655 | chr2 | 152645878 | 152646278 |
| chr3 | 58096747 | 58096847 | chr2 | 152694904 | 152695053 |
| chr3 | 58212352 | 58212452 | chr2 | 152714452 | 152714552 |
| chr3 | 58212903 | 58214252 | chr2 | 152791562 | 152791862 |
| chr3 | 58405027 | 58405627 | chr2 | 152975063 | 152975163 |
| chr3 | 58673011 | 58673560 | chr2 | 153121331 | 153121680 |
| chr3 | 58699900 | 58700149 | chr2 | 153201711 | 153201811 |
| chr3 | 58701000 | 58701300 | chr2 | 153251660 | 153251909 |
| chr3 | 60020866 | 60020966 | chr2 | 153443314 | 153443414 |
| chr3 | 60883208 | 60883457 | chr2 | 153592511 | 153592711 |
| chr3 | 60884008 | 60884308 | chr2 | 153701306 | 153701406 |
| chr3 | 62815486 | 62815586 | chr2 | 153876860 | 153876960 |
| chr3 | 62816135 | 62816238 | chr2 | 153878509 | 153878709 |
| chr3 | 64629398 | 64629647 | chr2 | 153904153 | 153904253 |
| chr3 | 64913168 | 64913568 | chr2 | 154149548 | 154150048 |
| chr3 | 64913717 | 64914017 | chr2 | 154150697 | 154151097 |
| chr3 | 65816534 | 65816683 | chr2 | 154573198 | 154573298 |
| chr3 | 66948880 | 66949290 | chr2 | 154852862 | 154852962 |
| chr3 | 68210495 | 68210944 | chr2 | 155196706 | 155196906 |
| chr3 | 69120429 | 69120626 | chr2 | 155317555 | 155317804 |



|      |          |          |      |           |           |
|------|----------|----------|------|-----------|-----------|
| chr3 | 69241869 | 69241969 | chr2 | 155341587 | 155341687 |
| chr3 | 75079253 | 75079553 | chr2 | 155342036 | 155342236 |
| chr3 | 81596202 | 81596551 | chr2 | 155735029 | 155735129 |
| chr3 | 81666490 | 81666690 | chr2 | 155786456 | 155786505 |
| chr3 | 82427391 | 82427740 | chr2 | 156025057 | 156025157 |
| chr3 | 83288046 | 83288146 | chr2 | 156140320 | 156140420 |
| chr3 | 83363533 | 83363733 | chr2 | 156272606 | 156272706 |
| chr3 | 83677879 | 83677984 | chr2 | 156435567 | 156435667 |
| chr3 | 84002695 | 84002795 | chr2 | 156659409 | 156659509 |
| chr3 | 84187457 | 84187557 | chr2 | 156799456 | 156799707 |
| chr3 | 85244325 | 85244425 | chr2 | 156966606 | 156966955 |
| chr3 | 85244574 | 85244825 | chr2 | 157094902 | 157095202 |
| chr3 | 85244977 | 85245174 | chr2 | 157306928 | 157307228 |
| chr3 | 85664559 | 85664659 | chr2 | 157327848 | 157327997 |
| chr3 | 86442818 | 86442918 | chr2 | 157518253 | 157518403 |
| chr3 | 86443873 | 86444173 | chr2 | 157526241 | 157526441 |
| chr3 | 86521857 | 86522057 | chr2 | 157988524 | 157988724 |
| chr3 | 86787010 | 86787468 | chr2 | 158188854 | 158189054 |
| chr3 | 87047414 | 87047614 | chr2 | 158218131 | 158218382 |
| chr3 | 87290470 | 87290770 | chr2 | 158335712 | 158336161 |
| chr3 | 87316978 | 87317278 | chr2 | 158462442 | 158462642 |
| chr3 | 87317427 | 87318027 | chr2 | 158584778 | 158584878 |
| chr3 | 87318478 | 87318927 | chr2 | 160327494 | 160327594 |
| chr3 | 87369071 | 87369220 | chr2 | 160605160 | 160605560 |
| chr3 | 87522306 | 87522806 | chr2 | 160840263 | 160840363 |
| chr3 | 87549057 | 87549206 | chr2 | 160840512 | 160840563 |
| chr3 | 87580161 | 87580361 | chr2 | 160841012 | 160841212 |
| chr3 | 87663948 | 87664248 | chr2 | 161068587 | 161068887 |
| chr3 | 87776601 | 87776950 | chr2 | 161069336 | 161069436 |
| chr3 | 87886206 | 87886306 | chr2 | 162977102 | 162977358 |
| chr3 | 87891129 | 87892129 | chr2 | 163359447 | 163359940 |
| chr3 | 87900265 | 87900865 | chr2 | 163398208 | 163398957 |
| chr3 | 87905981 | 87906630 | chr2 | 163505418 | 163505570 |
| chr3 | 87931982 | 87932082 | chr2 | 163768218 | 163768667 |
| chr3 | 87932933 | 87933688 | chr2 | 163879263 | 163880563 |
| chr3 | 87977196 | 87977396 | chr2 | 164033933 | 164034582 |
| chr3 | 88014978 | 88015178 | chr2 | 164150089 | 164150389 |
| chr3 | 88025273 | 88025373 | chr2 | 164364655 | 164364804 |
| chr3 | 88057664 | 88058164 | chr2 | 164440035 | 164440135 |
| chr3 | 88069796 | 88070196 | chr2 | 164522610 | 164522959 |
| chr3 | 88070845 | 88071045 | chr2 | 164545372 | 164545572 |
| chr3 | 88071596 | 88072145 | chr2 | 164614740 | 164614840 |
| chr3 | 88175108 | 88175710 | chr2 | 164615640 | 164615789 |

|      |          |          |      |           |           |
|------|----------|----------|------|-----------|-----------|
| chr3 | 88472448 | 88472749 | chr2 | 164615840 | 164616089 |
| chr3 | 88614707 | 88615007 | chr2 | 164675153 | 164675254 |
| chr3 | 88723156 | 88723456 | chr2 | 164729223 | 164729572 |
| chr3 | 88751287 | 88751339 | chr2 | 164745311 | 164745511 |
| chr3 | 88766354 | 88766403 | chr2 | 164746060 | 164746260 |
| chr3 | 88859372 | 88859472 | chr2 | 164764136 | 164764836 |
| chr3 | 88924359 | 88925259 | chr2 | 164764985 | 164765385 |
| chr3 | 88957212 | 88957412 | chr2 | 164818103 | 164818252 |
| chr3 | 89435308 | 89435408 | chr2 | 164838773 | 164839073 |
| chr3 | 89573959 | 89574059 | chr2 | 164927513 | 164927613 |
| chr3 | 89743082 | 89743182 | chr2 | 165247222 | 165247371 |
| chr3 | 89769929 | 89770241 | chr2 | 165248422 | 165249271 |
| chr3 | 89776026 | 89776126 | chr2 | 165276288 | 165276437 |
| chr3 | 89788889 | 89789089 | chr2 | 165286174 | 165286374 |
| chr3 | 89997731 | 89997980 | chr2 | 165286523 | 165287023 |
| chr3 | 90012921 | 90013070 | chr2 | 165347654 | 165347803 |
| chr3 | 90031009 | 90031309 | chr2 | 165360029 | 165360178 |
| chr3 | 90034751 | 90035000 | chr2 | 166115768 | 166115960 |
| chr3 | 90048286 | 90049235 | chr2 | 166753910 | 166754010 |
| chr3 | 90062039 | 90062339 | chr2 | 167149952 | 167150052 |
| chr3 | 90063088 | 90063388 | chr2 | 167381437 | 167381537 |
| chr3 | 90128738 | 90129091 | chr2 | 167452139 | 167452239 |
| chr3 | 94001174 | 94001423 | chr2 | 167591736 | 167591836 |
| chr3 | 94360068 | 94360168 | chr2 | 167620944 | 167621044 |
| chr3 | 94408872 | 94409321 | chr2 | 167649758 | 167650515 |
| chr3 | 94497175 | 94497575 | chr2 | 168561799 | 168562099 |
| chr3 | 94538251 | 94538351 | chr2 | 168726424 | 168726873 |
| chr3 | 94619628 | 94619877 | chr2 | 168914954 | 168915203 |
| chr3 | 94647370 | 94647570 | chr2 | 169922482 | 169922782 |
| chr3 | 94655398 | 94655698 | chr2 | 169923032 | 169923131 |
| chr3 | 94657398 | 94657498 | chr2 | 170456322 | 170456971 |
| chr3 | 94685513 | 94685613 | chr2 | 170691539 | 170691739 |
| chr3 | 94686762 | 94686862 | chr2 | 170691888 | 170692188 |
| chr3 | 94739649 | 94739798 | chr2 | 172400172 | 172400321 |
| chr3 | 94739849 | 94740198 | chr2 | 173028695 | 173028795 |
| chr3 | 94750819 | 94750919 | chr2 | 173160335 | 173160435 |
| chr3 | 94751068 | 94751319 | chr2 | 173284947 | 173286198 |
| chr3 | 94751668 | 94751768 | chr2 | 173667423 | 173667623 |
| chr3 | 94764095 | 94764495 | chr2 | 173745552 | 173746001 |
| chr3 | 94773042 | 94773591 | chr2 | 174082383 | 174082832 |
| chr3 | 94837291 | 94837491 | chr2 | 174084450 | 174084501 |
| chr3 | 95047283 | 95047483 | chr2 | 174118027 | 174118127 |
| chr3 | 95047932 | 95048042 | chr2 | 174423766 | 174423866 |

|      |           |           |      |           |           |
|------|-----------|-----------|------|-----------|-----------|
| chr3 | 95261503  | 95262752  | chr2 | 174446555 | 174447104 |
| chr3 | 95278416  | 95278578  | chr2 | 174472106 | 174472406 |
| chr3 | 95416400  | 95416849  | chr2 | 178953937 | 178954037 |
| chr3 | 95517880  | 95517980  | chr2 | 178982168 | 178982268 |
| chr3 | 95694590  | 95694739  | chr2 | 179583459 | 179583866 |
| chr3 | 95761566  | 95761666  | chr2 | 179658974 | 179659174 |
| chr3 | 95763272  | 95763370  | chr2 | 179797750 | 179797799 |
| chr3 | 95768170  | 95768270  | chr2 | 179813416 | 179813616 |
| chr3 | 95769021  | 95769121  | chr2 | 179874175 | 179875924 |
| chr3 | 96336934  | 96338083  | chr2 | 180000779 | 180000879 |
| chr3 | 96352566  | 96353015  | chr2 | 180039277 | 180039477 |
| chr3 | 96448171  | 96448420  | chr2 | 180040326 | 180040426 |
| chr3 | 96738997  | 96739197  | chr2 | 180242251 | 180242451 |
| chr3 | 97149815  | 97150364  | chr2 | 180250301 | 180250450 |
| chr3 | 97214036  | 97214887  | chr2 | 180316402 | 180317151 |
| chr3 | 97215036  | 97215136  | chr2 | 180460887 | 180460987 |
| chr3 | 97290104  | 97290404  | chr2 | 180494645 | 180494796 |
| chr3 | 97412848  | 97413097  | chr2 | 180494945 | 180495045 |
| chr3 | 97535578  | 97535878  | chr2 | 180727144 | 180727344 |
| chr3 | 97681863  | 97682763  | chr2 | 180859795 | 180860044 |
| chr3 | 97802575  | 97802724  | chr2 | 181033012 | 181033212 |
| chr3 | 97802975  | 97803124  | chr2 | 181060407 | 181060507 |
| chr3 | 97864010  | 97864159  | chr2 | 181122025 | 181122225 |
| chr3 | 97905037  | 97905437  | chr2 | 181220361 | 181220761 |
| chr3 | 98726323  | 98726523  | chr2 | 181233427 | 181233527 |
| chr3 | 99639902  | 99640063  | chr2 | 181233876 | 181233976 |
| chr3 | 99641002  | 99641102  | chr1 | 4797620   | 4798120   |
| chr3 | 100164679 | 100164779 | chr1 | 4847895   | 4848244   |
| chr3 | 100855297 | 100855697 | chr1 | 5073353   | 5073453   |
| chr3 | 100856246 | 100856446 | chr1 | 6720180   | 6720388   |
| chr3 | 101375904 | 101376355 | chr1 | 7110629   | 7110878   |
| chr3 | 101403413 | 101403513 | chr1 | 9540389   | 9540489   |
| chr3 | 101683542 | 101684349 | chr1 | 9743179   | 9743279   |
| chr3 | 101684693 | 101685093 | chr1 | 9902785   | 9903585   |
| chr3 | 102499415 | 102499515 | chr1 | 13369465  | 13369665  |
| chr3 | 102499664 | 102499864 | chr1 | 13656578  | 13657227  |
| chr3 | 103270713 | 103270813 | chr1 | 13662818  | 13662967  |
| chr3 | 103447351 | 103447500 | chr1 | 14750414  | 14750963  |
| chr3 | 104256127 | 104256627 | chr1 | 14914736  | 14914885  |
| chr3 | 104258727 | 104259276 | chr1 | 16659765  | 16660065  |
| chr3 | 104342266 | 104342615 | chr1 | 17139144  | 17139497  |
| chr3 | 104440438 | 104440538 | chr1 | 17140644  | 17140793  |
| chr3 | 104934695 | 104934847 | chr1 | 17722169  | 17722820  |

|      |           |           |      |          |          |
|------|-----------|-----------|------|----------|----------|
| chr3 | 104936195 | 104936295 | chr1 | 20814824 | 20815173 |
| chr3 | 105278967 | 105279167 | chr1 | 20816149 | 20816298 |
| chr3 | 105347186 | 105347435 | chr1 | 21074569 | 21075370 |
| chr3 | 105380465 | 105380565 | chr1 | 23821102 | 23821702 |
| chr3 | 105437177 | 105437377 | chr1 | 24235302 | 24236103 |
| chr3 | 105449681 | 105449930 | chr1 | 24646269 | 24646672 |
| chr3 | 106936178 | 106937078 | chr1 | 31119238 | 31119338 |
| chr3 | 106938027 | 106938227 | chr1 | 32342049 | 32342298 |
| chr3 | 106995647 | 106995847 | chr1 | 33839167 | 33839516 |
| chr3 | 107109403 | 107109503 | chr1 | 33926956 | 33927356 |
| chr3 | 107421514 | 107421663 | chr1 | 34329075 | 34329375 |
| chr3 | 107570447 | 107570596 | chr1 | 34705191 | 34705249 |
| chr3 | 107663914 | 107664014 | chr1 | 34730518 | 34730718 |
| chr3 | 107892774 | 107893074 | chr1 | 34847331 | 34847631 |
| chr3 | 107893723 | 107893823 | chr1 | 34971006 | 34971206 |
| chr3 | 108069545 | 108069645 | chr1 | 35012167 | 35012267 |
| chr3 | 108199423 | 108199523 | chr1 | 36412893 | 36412993 |
| chr3 | 108317782 | 108318031 | chr1 | 36413242 | 36413642 |
| chr3 | 108417063 | 108417763 | chr1 | 36414493 | 36414742 |
| chr3 | 108818262 | 108818362 | chr1 | 36443482 | 36443631 |
| chr3 | 115128479 | 115128579 | chr1 | 36476697 | 36477097 |
| chr3 | 115128928 | 115129128 | chr1 | 36640466 | 36640666 |
| chr3 | 115921442 | 115921642 | chr1 | 36852979 | 36853086 |
| chr3 | 117975809 | 117976009 | chr1 | 36860481 | 36860681 |
| chr3 | 117976358 | 117976458 | chr1 | 36929320 | 36929420 |
| chr3 | 119198543 | 119198639 | chr1 | 38033723 | 38033823 |
| chr3 | 120677929 | 120678781 | chr1 | 38086937 | 38087286 |
| chr3 | 120945852 | 120946501 | chr1 | 38797092 | 38797592 |
| chr3 | 120946952 | 120948112 | chr1 | 39156957 | 39157406 |
| chr3 | 121057446 | 121057542 | chr1 | 39363391 | 39363791 |
| chr3 | 121456272 | 121456529 | chr1 | 39704545 | 39704945 |
| chr3 | 121458521 | 121458621 | chr1 | 39820275 | 39820375 |
| chr3 | 121659104 | 121659204 | chr1 | 40849155 | 40849407 |
| chr3 | 121831640 | 121832212 | chr1 | 42865789 | 42866089 |
| chr3 | 122141000 | 122141349 | chr1 | 43020326 | 43020726 |
| chr3 | 122338096 | 122338296 | chr1 | 43614394 | 43614694 |
| chr3 | 122860826 | 122860926 | chr1 | 43899214 | 43899514 |
| chr3 | 126010186 | 126010286 | chr1 | 43996941 | 43997041 |
| chr3 | 126357362 | 126358300 | chr1 | 44102950 | 44103050 |
| chr3 | 126358549 | 126358949 | chr1 | 44315590 | 44315741 |
| chr3 | 126966914 | 126967014 | chr1 | 44316890 | 44316990 |
| chr3 | 127203432 | 127203832 | chr1 | 51096165 | 51096265 |
| chr3 | 127222327 | 127222627 | chr1 | 51647378 | 51647627 |

|      |           |           |      |          |          |
|------|-----------|-----------|------|----------|----------|
| chr3 | 127222778 | 127222939 | chr1 | 52085244 | 52085644 |
| chr3 | 127310253 | 127310353 | chr1 | 52799989 | 52800138 |
| chr3 | 127310804 | 127311853 | chr1 | 52896510 | 52896610 |
| chr3 | 128613456 | 128613605 | chr1 | 52986729 | 52986829 |
| chr3 | 128945952 | 128946052 | chr1 | 53121783 | 53121883 |
| chr3 | 129237261 | 129237956 | chr1 | 53229905 | 53230259 |
| chr3 | 129250550 | 129250700 | chr1 | 53230905 | 53231054 |
| chr3 | 129384932 | 129385288 | chr1 | 53465955 | 53466404 |
| chr3 | 129592991 | 129594291 | chr1 | 54419787 | 54420236 |
| chr3 | 130444151 | 130444351 | chr1 | 55221812 | 55222012 |
| chr3 | 130526751 | 130526951 | chr1 | 55256759 | 55256859 |
| chr3 | 130527100 | 130527200 | chr1 | 55406425 | 55406525 |
| chr3 | 130939617 | 130939866 | chr1 | 57142335 | 57142435 |
| chr3 | 132339062 | 132339162 | chr1 | 57575377 | 57575677 |
| chr3 | 132623911 | 132624063 | chr1 | 57575926 | 57576026 |
| chr3 | 132932790 | 132933090 | chr1 | 58138694 | 58139243 |
| chr3 | 133628089 | 133628489 | chr1 | 58199345 | 58199445 |
| chr3 | 134668829 | 134669078 | chr1 | 58561577 | 58562077 |
| chr3 | 134736199 | 134736599 | chr1 | 58592695 | 58592795 |
| chr3 | 134736948 | 134737048 | chr1 | 58866099 | 58866299 |
| chr3 | 134872208 | 134872308 | chr1 | 58866548 | 58866748 |
| chr3 | 134873157 | 134873810 | chr1 | 59142512 | 59142712 |
| chr3 | 134874159 | 134874359 | chr1 | 59264299 | 59264498 |
| chr3 | 136058210 | 136058410 | chr1 | 59289048 | 59289148 |
| chr3 | 137370165 | 137371214 | chr1 | 59290348 | 59290597 |
| chr3 | 137831351 | 137831451 | chr1 | 59327610 | 59327759 |
| chr3 | 137831600 | 137831700 | chr1 | 59650820 | 59651569 |
| chr3 | 137878172 | 137878372 | chr1 | 59839700 | 59840100 |
| chr3 | 137914046 | 137914595 | chr1 | 60081847 | 60081956 |
| chr3 | 140600396 | 140600745 | chr1 | 60267422 | 60267522 |
| chr3 | 141783659 | 141783759 | chr1 | 60267771 | 60267871 |
| chr3 | 141883974 | 141884123 | chr1 | 60512213 | 60512362 |
| chr3 | 143958020 | 143958120 | chr1 | 60578243 | 60578443 |
| chr3 | 144110165 | 144110414 | chr1 | 64281017 | 64281117 |
| chr3 | 145312819 | 145312919 | chr1 | 64776508 | 64776608 |
| chr3 | 145510232 | 145510381 | chr1 | 65210438 | 65210838 |
| chr3 | 145983690 | 145983890 | chr1 | 65232526 | 65232640 |
| chr3 | 145984239 | 145984939 | chr1 | 65263145 | 65264094 |
| chr3 | 146039354 | 146040003 | chr1 | 66084461 | 66085012 |
| chr3 | 146201721 | 146201821 | chr1 | 66335068 | 66335168 |
| chr3 | 148692270 | 148692670 | chr1 | 66335417 | 66335617 |
| chr3 | 148692822 | 148693030 | chr1 | 67023356 | 67023456 |
| chr3 | 150824623 | 150824779 | chr1 | 69845375 | 69845726 |

|      |           |           |      |          |          |
|------|-----------|-----------|------|----------|----------|
| chr3 | 150825823 | 150826172 | chr1 | 71262907 | 71263007 |
| chr3 | 151553942 | 151554491 | chr1 | 71717013 | 71717362 |
| chr3 | 151555442 | 151555742 | chr1 | 71812711 | 71812960 |
| chr3 | 151599511 | 151599811 | chr1 | 72860405 | 72860654 |
| chr3 | 151728532 | 151729187 | chr1 | 72860705 | 72861057 |
| chr3 | 152371452 | 152371552 | chr1 | 72870832 | 72870981 |
| chr3 | 153294832 | 153294933 | chr1 | 74353476 | 74353625 |
| chr3 | 153301401 | 153301550 | chr1 | 74443274 | 74443423 |
| chr2 | 3200759   | 3200959   | chr1 | 74444374 | 74444623 |
| chr2 | 3251063   | 3251163   | chr1 | 74464150 | 74464353 |
| chr2 | 3283441   | 3283990   | chr1 | 74549992 | 74550088 |
| chr2 | 3348839   | 3348988   | chr1 | 74568246 | 74568346 |
| chr2 | 3392084   | 3392384   | chr1 | 74665698 | 74665798 |
| chr2 | 4641564   | 4642264   | chr1 | 74702772 | 74702921 |
| chr2 | 4988258   | 4988358   | chr1 | 74747601 | 74747801 |
| chr2 | 5640484   | 5640684   | chr1 | 74747950 | 74748001 |
| chr2 | 6137863   | 6137963   | chr1 | 75044960 | 75045209 |
| chr2 | 6276106   | 6277152   | chr1 | 75052676 | 75052825 |
| chr2 | 6277901   | 6278001   | chr1 | 75096245 | 75096494 |
| chr2 | 6466752   | 6466849   | chr1 | 75244439 | 75244539 |
| chr2 | 6809289   | 6809438   | chr1 | 75251288 | 75251837 |
| chr2 | 9802677   | 9803126   | chr1 | 75278968 | 75279117 |
| chr2 | 10078816  | 10078965  | chr1 | 75289933 | 75290736 |
| chr2 | 11097882  | 11098031  | chr1 | 75301323 | 75301623 |
| chr2 | 11631290  | 11631590  | chr1 | 75320856 | 75321005 |
| chr2 | 11702826  | 11703326  | chr1 | 75346488 | 75346637 |
| chr2 | 11703877  | 11704126  | chr1 | 75374151 | 75374300 |
| chr2 | 12226821  | 12227170  | chr1 | 75429488 | 75429594 |
| chr2 | 14981110  | 14981310  | chr1 | 75587581 | 75587830 |
| chr2 | 16281421  | 16281821  | chr1 | 75588681 | 75588981 |
| chr2 | 17922146  | 17922505  | chr1 | 75654546 | 75655546 |
| chr2 | 19296935  | 19297084  | chr1 | 77624990 | 77625239 |
| chr2 | 21064819  | 21065219  | chr1 | 78306988 | 78307088 |
| chr2 | 22614576  | 22614925  | chr1 | 78598349 | 78598649 |
| chr2 | 22614976  | 22615425  | chr1 | 79553816 | 79554067 |
| chr2 | 22631824  | 22632077  | chr1 | 79785696 | 79785796 |
| chr2 | 22633424  | 22633773  | chr1 | 79786345 | 79786545 |
| chr2 | 24364097  | 24364397  | chr1 | 82405891 | 82405991 |
| chr2 | 24864318  | 24864467  | chr1 | 82453849 | 82454377 |
| chr2 | 25069053  | 25069553  | chr1 | 82700801 | 82700901 |
| chr2 | 25100161  | 25100361  | chr1 | 82701250 | 82701550 |
| chr2 | 25101712  | 25102212  | chr1 | 83230807 | 83230907 |
| chr2 | 25113921  | 25114021  | chr1 | 83231056 | 83231366 |

|      |          |          |      |          |          |
|------|----------|----------|------|----------|----------|
| chr2 | 25122734 | 25122983 | chr1 | 84952090 | 84952690 |
| chr2 | 25128428 | 25128528 | chr1 | 84954045 | 84954145 |
| chr2 | 25144384 | 25144633 | chr1 | 85049157 | 85049257 |
| chr2 | 25161229 | 25161378 | chr1 | 87856892 | 87856992 |
| chr2 | 25177826 | 25178326 | chr1 | 88026497 | 88026797 |
| chr2 | 25178677 | 25179177 | chr1 | 88116170 | 88117219 |
| chr2 | 25207859 | 25208210 | chr1 | 88487714 | 88488114 |
| chr2 | 25208461 | 25208559 | chr1 | 88543980 | 88544329 |
| chr2 | 25221688 | 25221888 | chr1 | 88547078 | 88547333 |
| chr2 | 25254157 | 25254306 | chr1 | 89052039 | 89052139 |
| chr2 | 25283088 | 25283837 | chr1 | 89086886 | 89087435 |
| chr2 | 25284888 | 25285088 | chr1 | 89116506 | 89116755 |
| chr2 | 25285237 | 25285437 | chr1 | 89226057 | 89226357 |
| chr2 | 25311614 | 25311863 | chr1 | 89555828 | 89556328 |
| chr2 | 25349625 | 25349774 | chr1 | 89556681 | 89556977 |
| chr2 | 25358362 | 25359811 | chr1 | 89764475 | 89764876 |
| chr2 | 25383642 | 25383792 | chr1 | 89765934 | 89766034 |
| chr2 | 25387808 | 25387908 | chr1 | 90168327 | 90168484 |
| chr2 | 25388857 | 25389057 | chr1 | 91032789 | 91032889 |
| chr2 | 25391008 | 25391457 | chr1 | 91977656 | 91978207 |
| chr2 | 25435625 | 25435825 | chr1 | 93015454 | 93015554 |
| chr2 | 25464802 | 25465451 | chr1 | 93016303 | 93016603 |
| chr2 | 25497526 | 25498026 | chr1 | 93213562 | 93213662 |
| chr2 | 25499277 | 25499426 | chr1 | 93259641 | 93259734 |
| chr2 | 25510788 | 25510937 | chr1 | 93260885 | 93261085 |
| chr2 | 25570456 | 25570905 | chr1 | 93284822 | 93284922 |
| chr2 | 25766591 | 25766791 | chr1 | 93376019 | 93376219 |
| chr2 | 25910242 | 25910342 | chr1 | 93422193 | 93422393 |
| chr2 | 25910691 | 25910791 | chr1 | 93503361 | 93503412 |
| chr2 | 25982827 | 25983127 | chr1 | 93503661 | 93503961 |
| chr2 | 26012191 | 26012991 | chr1 | 93762924 | 93763324 |
| chr2 | 26095087 | 26095487 | chr1 | 94612289 | 94612742 |
| chr2 | 26204570 | 26204670 | chr1 | 94874401 | 94874601 |
| chr2 | 26270979 | 26271179 | chr1 | 94968981 | 94969530 |
| chr2 | 26271328 | 26271379 | chr1 | 95097892 | 95097992 |
| chr2 | 26276478 | 26277778 | chr1 | 95441491 | 95442040 |
| chr2 | 26392917 | 26393668 | chr1 | 95716480 | 95716580 |
| chr2 | 26469113 | 26469262 | chr1 | 95718032 | 95718132 |
| chr2 | 26791651 | 26792100 | chr1 | 95766436 | 95766536 |
| chr2 | 26800291 | 26801598 | chr1 | 96014801 | 96015301 |
| chr2 | 26821899 | 26821999 | chr1 | 97276491 | 97276791 |
| chr2 | 26896980 | 26897080 | chr1 | 99732247 | 99732747 |
| chr2 | 26916721 | 26916970 | chr1 | 99732996 | 99733320 |

|      |          |          |      |           |           |
|------|----------|----------|------|-----------|-----------|
| chr2 | 26961592 | 26962841 | chr1 | 107322426 | 107322526 |
| chr2 | 26968211 | 26968411 | chr1 | 107745829 | 107745929 |
| chr2 | 27031254 | 27031554 | chr1 | 108679409 | 108679509 |
| chr2 | 27053963 | 27054163 | chr1 | 108761783 | 108762132 |
| chr2 | 27316307 | 27316407 | chr1 | 121388205 | 121388611 |
| chr2 | 27404144 | 27404244 | chr1 | 121492023 | 121492123 |
| chr2 | 28081726 | 28082226 | chr1 | 121614044 | 121614244 |
| chr2 | 28356809 | 28357558 | chr1 | 121614593 | 121614693 |
| chr2 | 28384796 | 28385254 | chr1 | 121878376 | 121878625 |
| chr2 | 28401861 | 28402161 | chr1 | 121972185 | 121972334 |
| chr2 | 28453593 | 28454242 | chr1 | 122039388 | 122039637 |
| chr2 | 28806766 | 28807366 | chr1 | 122230366 | 122230666 |
| chr2 | 29136571 | 29137171 | chr1 | 122232366 | 122232515 |
| chr2 | 29138420 | 29138820 | chr1 | 123293170 | 123293419 |
| chr2 | 29236269 | 29236318 | chr1 | 123396622 | 123397171 |
| chr2 | 29508150 | 29508350 | chr1 | 123533436 | 123533536 |
| chr2 | 29689810 | 29689968 | chr1 | 123533885 | 123534088 |
| chr2 | 29691510 | 29692159 | chr1 | 127401347 | 127401447 |
| chr2 | 29758024 | 29758124 | chr1 | 127877322 | 127878071 |
| chr2 | 29938205 | 29938925 | chr1 | 129739371 | 129739571 |
| chr2 | 29938969 | 29939521 | chr1 | 130068613 | 130068870 |
| chr2 | 29950603 | 29951203 | chr1 | 132388366 | 132388873 |
| chr2 | 29951352 | 29951452 | chr1 | 132428241 | 132428341 |
| chr2 | 29966496 | 29966696 | chr1 | 133063400 | 133063500 |
| chr2 | 29982815 | 29982917 | chr1 | 133793184 | 133793384 |
| chr2 | 30012985 | 30013334 | chr1 | 133831099 | 133831252 |
| chr2 | 30174963 | 30175063 | chr1 | 133875949 | 133876049 |
| chr2 | 30249481 | 30250138 | chr1 | 133936116 | 133936216 |
| chr2 | 30253560 | 30253660 | chr1 | 134195524 | 134195624 |
| chr2 | 30304280 | 30304780 | chr1 | 134264233 | 134264333 |
| chr2 | 30363699 | 30364252 | chr1 | 134281445 | 134281545 |
| chr2 | 30365101 | 30365201 | chr1 | 134357238 | 134357338 |
| chr2 | 30733311 | 30733711 | chr1 | 134382990 | 134383290 |
| chr2 | 30792177 | 30792377 | chr1 | 134442987 | 134443136 |
| chr2 | 30792528 | 30792877 | chr1 | 134508024 | 134508373 |
| chr2 | 30840960 | 30841060 | chr1 | 134991056 | 134991256 |
| chr2 | 30872617 | 30872774 | chr1 | 135329343 | 135329643 |
| chr2 | 30883521 | 30884672 | chr1 | 135359175 | 135359484 |
| chr2 | 30885421 | 30885521 | chr1 | 135587055 | 135587155 |
| chr2 | 31041664 | 31041813 | chr1 | 135729524 | 135729724 |
| chr2 | 31134453 | 31134653 | chr1 | 135883415 | 135883564 |
| chr2 | 31326399 | 31326499 | chr1 | 136055498 | 136055898 |
| chr2 | 31357700 | 31358700 | chr1 | 136169990 | 136170139 |



|      |          |          |      |           |           |
|------|----------|----------|------|-----------|-----------|
| chr2 | 31461247 | 31461547 | chr1 | 136338198 | 136338298 |
| chr2 | 31647761 | 31647861 | chr1 | 136338747 | 136338847 |
| chr2 | 31699149 | 31699249 | chr1 | 136382332 | 136382481 |
| chr2 | 31736146 | 31736846 | chr1 | 136431999 | 136432652 |
| chr2 | 31775411 | 31776411 | chr1 | 136471551 | 136471602 |
| chr2 | 31837882 | 31838089 | chr1 | 137081519 | 137081619 |
| chr2 | 32039687 | 32040087 | chr1 | 137081868 | 137082268 |
| chr2 | 32276819 | 32277519 | chr1 | 137106019 | 137106568 |
| chr2 | 32340054 | 32340403 | chr1 | 137144616 | 137144819 |
| chr2 | 32341703 | 32341803 | chr1 | 137260726 | 137260926 |
| chr2 | 32464749 | 32464998 | chr1 | 137560664 | 137560815 |
| chr2 | 32465949 | 32466498 | chr1 | 137562665 | 137562865 |
| chr2 | 32476420 | 32476569 | chr1 | 137776424 | 137776624 |
| chr2 | 32535833 | 32535982 | chr1 | 137994970 | 137995070 |
| chr2 | 32608502 | 32609053 | chr1 | 138210907 | 138211556 |
| chr2 | 32664051 | 32664451 | chr1 | 138391813 | 138392462 |
| chr2 | 32735657 | 32735857 | chr1 | 140596288 | 140596588 |
| chr2 | 32871987 | 32872236 | chr1 | 140825462 | 140825711 |
| chr2 | 33104399 | 33104699 | chr1 | 145635075 | 145635175 |
| chr2 | 33261581 | 33262073 | chr1 | 145708876 | 145708976 |
| chr2 | 33359275 | 33359424 | chr1 | 145936291 | 145936440 |
| chr2 | 34760653 | 34760914 | chr1 | 152925377 | 152925828 |
| chr2 | 34763165 | 34763414 | chr1 | 153276352 | 153277001 |
| chr2 | 34850703 | 34851152 | chr1 | 153360109 | 153360209 |
| chr2 | 34851903 | 34852052 | chr1 | 154318224 | 154318424 |
| chr2 | 34989491 | 34989940 | chr1 | 154318673 | 154318879 |
| chr2 | 35090100 | 35090200 | chr1 | 154331971 | 154332171 |
| chr2 | 35170970 | 35171070 | chr1 | 154332320 | 154332420 |
| chr2 | 35225940 | 35226089 | chr1 | 154697592 | 154698192 |
| chr2 | 35581373 | 35581473 | chr1 | 155265277 | 155265477 |
| chr2 | 35995602 | 35996151 | chr1 | 156658198 | 156658760 |
| chr2 | 38894211 | 38894511 | chr1 | 157090683 | 157090783 |
| chr2 | 44876972 | 44877072 | chr1 | 157669248 | 157669397 |
| chr2 | 44878221 | 44878629 | chr1 | 158334419 | 158334668 |
| chr2 | 49674965 | 49675665 | chr1 | 158497677 | 158497977 |
| chr2 | 49676516 | 49676616 | chr1 | 158742635 | 158742835 |
| chr2 | 49677065 | 49677166 | chr1 | 158862607 | 158862762 |
| chr2 | 50017100 | 50017450 | chr1 | 159482173 | 159482273 |
| chr2 | 51516641 | 51516797 | chr1 | 159482522 | 159482622 |
| chr2 | 51925243 | 51925543 | chr1 | 160379611 | 160379860 |
| chr2 | 51925692 | 51925798 | chr1 | 161255419 | 161255619 |
| chr2 | 51960662 | 51961792 | chr1 | 162178376 | 162178976 |
| chr2 | 52313854 | 52313954 | chr1 | 162375556 | 162376105 |

|      |          |          |      |           |           |
|------|----------|----------|------|-----------|-----------|
| chr2 | 52568775 | 52569076 | chr1 | 163011122 | 163011222 |
| chr2 | 52638257 | 52638457 | chr1 | 163057944 | 163058144 |
| chr2 | 53975037 | 53975337 | chr1 | 163993024 | 163993173 |
| chr2 | 55325691 | 55326340 | chr1 | 164594214 | 164594414 |
| chr2 | 57005091 | 57005240 | chr1 | 164594763 | 164594863 |
| chr2 | 57005391 | 57005540 | chr1 | 165427128 | 165427277 |
| chr2 | 58405195 | 58405500 | chr1 | 165953261 | 165953361 |
| chr2 | 58405749 | 58406000 | chr1 | 166019663 | 166019863 |
| chr2 | 59036094 | 59036194 | chr1 | 166020218 | 166020312 |
| chr2 | 59486818 | 59487018 | chr1 | 166272441 | 166272641 |
| chr2 | 60160893 | 60161045 | chr1 | 166482591 | 166482791 |
| chr2 | 60549614 | 60550020 | chr1 | 167184709 | 167184760 |
| chr2 | 60838044 | 60838344 | chr1 | 167217407 | 167217507 |
| chr2 | 62539601 | 62540051 | chr1 | 167217956 | 167218156 |
| chr2 | 63973919 | 63974019 | chr1 | 167482994 | 167483494 |
| chr2 | 65239498 | 65239647 | chr1 | 167484143 | 167484243 |
| chr2 | 69255536 | 69255785 | chr1 | 167508169 | 167508318 |
| chr2 | 70163565 | 70163866 | chr1 | 167731447 | 167731547 |
| chr2 | 70348597 | 70348797 | chr1 | 167787566 | 167787815 |
| chr2 | 70929575 | 70929686 | chr1 | 167811917 | 167812417 |
| chr2 | 71242778 | 71242878 | chr1 | 168025694 | 168026696 |
| chr2 | 71264632 | 71264732 | chr1 | 168150985 | 168151134 |
| chr2 | 71594998 | 71595147 | chr1 | 168151885 | 168152435 |
| chr2 | 71854561 | 71855221 | chr1 | 168153585 | 168153734 |
| chr2 | 71856710 | 71856910 | chr1 | 168262680 | 168262989 |
| chr2 | 72160351 | 72160451 | chr1 | 168332672 | 168332921 |
| chr2 | 72172013 | 72172861 | chr1 | 168402586 | 168402686 |
| chr2 | 72855878 | 72856078 | chr1 | 168433442 | 168433542 |
| chr2 | 73090922 | 73091022 | chr1 | 169332505 | 169332605 |
| chr2 | 73091371 | 73091471 | chr1 | 169417133 | 169417333 |
| chr2 | 73147153 | 73147253 | chr1 | 169490516 | 169490616 |
| chr2 | 73455081 | 73455181 | chr1 | 169622070 | 169622419 |
| chr2 | 73456030 | 73456635 | chr1 | 169712693 | 169712893 |
| chr2 | 73767403 | 73767703 | chr1 | 172135147 | 172136096 |
| chr2 | 73767852 | 73768052 | chr1 | 172198582 | 172198682 |
| chr2 | 73769607 | 73769864 | chr1 | 172200234 | 172200383 |
| chr2 | 74555767 | 74556067 | chr1 | 172668676 | 172668776 |
| chr2 | 74572837 | 74573037 | chr1 | 172908876 | 172909076 |
| chr2 | 74625281 | 74625730 | chr1 | 172938280 | 172938477 |
| chr2 | 75534351 | 75534551 | chr1 | 173294105 | 173294254 |
| chr2 | 75580281 | 75580381 | chr1 | 173311284 | 173311584 |
| chr2 | 76243791 | 76244096 | chr1 | 173312535 | 173312635 |
| chr2 | 76245069 | 76245269 | chr1 | 173352404 | 173352804 |

|      |          |          |      |           |           |
|------|----------|----------|------|-----------|-----------|
| chr2 | 76550063 | 76550263 | chr1 | 173384434 | 173385434 |
| chr2 | 77046811 | 77046911 | chr1 | 173393984 | 173394084 |
| chr2 | 77155916 | 77156016 | chr1 | 173412848 | 173412948 |
| chr2 | 77157267 | 77157567 | chr1 | 173526971 | 173527520 |
| chr2 | 77692340 | 77692440 | chr1 | 173678160 | 173678515 |
| chr2 | 79135019 | 79135119 | chr1 | 174051657 | 174051957 |
| chr2 | 80460989 | 80461089 | chr1 | 174082250 | 174082404 |
| chr2 | 83603605 | 83603705 | chr1 | 174400042 | 174400491 |
| chr2 | 84353249 | 84353549 | chr1 | 174521850 | 174522250 |
| chr2 | 84549683 | 84549832 | chr1 | 174524099 | 174524299 |
| chr2 | 84765667 | 84765967 | chr1 | 174656798 | 174657298 |
| chr2 | 85015974 | 85016323 | chr1 | 174657949 | 174658049 |
| chr2 | 85077074 | 85077923 | chr1 | 175238339 | 175238588 |
| chr2 | 85899214 | 85899514 | chr1 | 175358931 | 175358980 |
| chr2 | 85899963 | 85900470 | chr1 | 175558938 | 175559290 |
| chr2 | 89724295 | 89724408 | chr1 | 176182361 | 176182511 |
| chr2 | 90662401 | 90662550 | chr1 | 177904384 | 177904833 |
| chr2 | 90765335 | 90765435 | chr1 | 178002201 | 178002550 |
| chr2 | 90765584 | 90765784 | chr1 | 178837046 | 178837146 |
| chr2 | 90784160 | 90784721 | chr1 | 178838100 | 178838195 |
| chr2 | 90797453 | 90797553 | chr1 | 178838246 | 178838395 |
| chr2 | 90913314 | 90913365 | chr1 | 180014597 | 180015347 |
| chr2 | 90913414 | 90913563 | chr1 | 180342039 | 180342239 |
| chr2 | 90933356 | 90933856 | chr1 | 180429069 | 180429918 |
| chr2 | 90951196 | 90951645 | chr1 | 180552760 | 180552960 |
| chr2 | 91116057 | 91116257 | chr1 | 180888310 | 180888510 |
| chr2 | 91135603 | 91136852 | chr1 | 181569415 | 181569515 |
| chr2 | 91805772 | 91807172 | chr1 | 181691430 | 181691530 |
| chr2 | 91812788 | 91812888 | chr1 | 181827201 | 181827401 |
| chr2 | 91843223 | 91843423 | chr1 | 182219319 | 182219719 |
| chr2 | 91903206 | 91903306 | chr1 | 182354469 | 182354618 |
| chr2 | 91905374 | 91905565 | chr1 | 182663939 | 182664339 |
| chr2 | 92251435 | 92251535 | chr1 | 182720121 | 182720221 |
| chr2 | 92253372 | 92253521 | chr1 | 182749329 | 182749429 |
| chr2 | 92255072 | 92255172 | chr1 | 182837740 | 182838140 |
| chr2 | 92255321 | 92255421 | chr1 | 182916578 | 182917078 |
| chr2 | 92260592 | 92261041 | chr1 | 182927595 | 182927844 |
| chr2 | 92261341 | 92262241 | chr1 | 182957045 | 182957145 |
| chr2 | 92262541 | 92262741 | chr1 | 182964653 | 182964853 |
| chr2 | 92280238 | 92280438 | chr1 | 182966004 | 182966311 |
| chr2 | 92281638 | 92281738 | chr1 | 183040582 | 183040682 |
| chr2 | 92282187 | 92282287 | chr1 | 183376314 | 183376414 |
| chr2 | 92491251 | 92491700 | chr1 | 183376563 | 183376663 |

|      |           |           |      |           |           |
|------|-----------|-----------|------|-----------|-----------|
| chr2 | 92905430  | 92905730  | chr1 | 183764622 | 183764980 |
| chr2 | 92906079  | 92906130  | chr1 | 183866268 | 183866468 |
| chr2 | 92907579  | 92907879  | chr1 | 184042748 | 184042948 |
| chr2 | 93069025  | 93069125  | chr1 | 184306195 | 184306395 |
| chr2 | 93069374  | 93069874  | chr1 | 184365042 | 184365142 |
| chr2 | 93215225  | 93215425  | chr1 | 184366793 | 184367148 |
| chr2 | 93702169  | 93702269  | chr1 | 184450590 | 184451446 |
| chr2 | 93744691  | 93744891  | chr1 | 184541060 | 184541160 |
| chr2 | 94318548  | 94318897  | chr1 | 184773316 | 184774067 |
| chr2 | 97346031  | 97346580  | chr1 | 185980811 | 185981011 |
| chr2 | 101504422 | 101504682 | chr1 | 186946049 | 186946149 |
| chr2 | 101676692 | 101676892 | chr1 | 187193113 | 187193269 |
| chr2 | 101677341 | 101677441 | chr1 | 187276020 | 187276071 |
| chr2 | 102065784 | 102065984 | chr1 | 187276220 | 187276420 |
| chr2 | 102331316 | 102331426 | chr1 | 187309767 | 187309867 |
| chr2 | 103183071 | 103183220 | chr1 | 187389338 | 187389438 |
| chr2 | 103303706 | 103303900 | chr1 | 188063880 | 188064229 |
| chr2 | 103950135 | 103950541 | chr1 | 188654808 | 188654908 |
| chr2 | 104000843 | 104001292 | chr1 | 191292102 | 191292651 |
| chr2 | 104002243 | 104002343 | chr1 | 191869358 | 191869507 |
| chr2 | 104468353 | 104468449 | chr1 | 191870858 | 191871107 |
| chr2 | 104621776 | 104621976 | chr1 | 192117323 | 192117723 |
| chr2 | 104623176 | 104623325 | chr1 | 192117872 | 192117972 |
| chr2 | 105102918 | 105103267 | chr1 | 192858513 | 192858762 |
| chr2 | 106850266 | 106850466 | chr1 | 193010273 | 193010522 |
| chr2 | 106853572 | 106853721 | chr1 | 193171514 | 193172063 |
| chr2 | 109160266 | 109160615 | chr1 | 193523071 | 193523171 |
| chr2 | 112119564 | 112119764 | chr1 | 193664939 | 193665039 |
| chr2 | 112145442 | 112145942 | chr1 | 194788477 | 194788634 |
| chr2 | 112359744 | 112359844 | chr1 | 194986862 | 194987611 |
| chr2 | 112371138 | 112371287 | chr1 | 195104117 | 195104217 |
| chr2 | 113207156 | 113207505 | chr1 | 195217209 | 195217465 |
| chr2 | 114012542 | 114013032 | chr1 | 195225205 | 195225305 |
| chr2 | 114160963 | 114161112 | chr1 | 195252692 | 195252841 |
| chr2 | 115541638 | 115541987 | chr1 | 195322494 | 195322643 |
| chr2 | 117080480 | 117080580 | chr9 | 4309334   | 4310083   |
| chr2 | 117081529 | 117081929 | chr9 | 7184565   | 7184765   |
| chr2 | 117304657 | 117304863 | chr9 | 7184914   | 7185014   |
| chr2 | 118235700 | 118235849 | chr9 | 7763506   | 7763606   |
| chr2 | 118237000 | 118238149 | chr9 | 7763955   | 7764055   |
| chr2 | 118510631 | 118511180 | chr9 | 8221721   | 8221821   |
| chr2 | 118621689 | 118622282 | chr9 | 8938918   | 8939067   |
| chr2 | 118622933 | 118623082 | chr9 | 13685117  | 13685217  |

|      |           |           |      |          |          |
|------|-----------|-----------|------|----------|----------|
| chr2 | 118721297 | 118721597 | chr9 | 13686466 | 13686566 |
| chr2 | 118723546 | 118723646 | chr9 | 14134596 | 14134696 |
| chr2 | 118740219 | 118740319 | chr9 | 14358773 | 14359122 |
| chr2 | 119117035 | 119117135 | chr9 | 14719097 | 14719197 |
| chr2 | 119132539 | 119132839 | chr9 | 14903622 | 14903922 |
| chr2 | 119134888 | 119134988 | chr9 | 15162754 | 15162954 |
| chr2 | 119167587 | 119167954 | chr9 | 15470251 | 15470351 |
| chr2 | 119190132 | 119190232 | chr9 | 15470600 | 15470800 |
| chr2 | 119197007 | 119197107 | chr9 | 18243914 | 18244263 |
| chr2 | 119247087 | 119247187 | chr9 | 18978843 | 18979097 |
| chr2 | 119247736 | 119247836 | chr9 | 20510332 | 20510432 |
| chr2 | 119437160 | 119437260 | chr9 | 20587215 | 20587315 |
| chr2 | 119758744 | 119759444 | chr9 | 20756676 | 20757425 |
| chr2 | 119862412 | 119863161 | chr9 | 20835016 | 20835116 |
| chr2 | 120204866 | 120205515 | chr9 | 20835767 | 20835916 |
| chr2 | 121130836 | 121130936 | chr9 | 20861223 | 20861473 |
| chr2 | 121316871 | 121317320 | chr9 | 20888188 | 20888239 |
| chr2 | 121373694 | 121373794 | chr9 | 20890375 | 20890524 |
| chr2 | 121409258 | 121409358 | chr9 | 20949973 | 20950422 |
| chr2 | 121466486 | 121466735 | chr9 | 21008192 | 21008641 |
| chr2 | 122118730 | 122118930 | chr9 | 21096799 | 21096999 |
| chr2 | 122119079 | 122119379 | chr9 | 21098999 | 21099250 |
| chr2 | 122273424 | 122273673 | chr9 | 21149505 | 21149605 |
| chr2 | 122326855 | 122327004 | chr9 | 21226840 | 21227240 |
| chr2 | 122571193 | 122572462 | chr9 | 21270001 | 21270101 |
| chr2 | 122595917 | 122596267 | chr9 | 21270750 | 21270850 |
| chr2 | 122598117 | 122598269 | chr9 | 21283232 | 21283732 |
| chr2 | 124613365 | 124613620 | chr9 | 21449456 | 21449656 |
| chr2 | 125028406 | 125028457 | chr9 | 21452156 | 21452256 |
| chr2 | 125110730 | 125111130 | chr9 | 21474285 | 21474485 |
| chr2 | 125113930 | 125114179 | chr9 | 21581863 | 21582312 |
| chr2 | 125993663 | 125994414 | chr9 | 21618272 | 21618472 |
| chr2 | 126513334 | 126513434 | chr9 | 21656803 | 21657052 |
| chr2 | 126635866 | 126635966 | chr9 | 21710602 | 21710702 |
| chr2 | 126835742 | 126835842 | chr9 | 21795059 | 21795659 |
| chr2 | 127093791 | 127093991 | chr9 | 21988940 | 21989089 |
| chr2 | 127229869 | 127230069 | chr9 | 22015080 | 22015280 |
| chr2 | 127323031 | 127323231 | chr9 | 22044651 | 22044909 |
| chr2 | 127501577 | 127501777 | chr9 | 22165624 | 22165773 |
| chr2 | 127544199 | 127544348 | chr9 | 22270063 | 22270523 |
| chr2 | 127689528 | 127689628 | chr9 | 23080961 | 23081061 |
| chr2 | 127690284 | 127691278 | chr9 | 24483489 | 24483689 |
| chr2 | 128084468 | 128085568 | chr9 | 24632283 | 24632483 |

|      |           |           |      |          |          |
|------|-----------|-----------|------|----------|----------|
| chr2 | 128086417 | 128086517 | chr9 | 24632932 | 24633032 |
| chr2 | 128824158 | 128824358 | chr9 | 25117707 | 25117807 |
| chr2 | 129552748 | 129552948 | chr9 | 26671641 | 26672090 |
| chr2 | 129659364 | 129659422 | chr9 | 26864859 | 26865208 |
| chr2 | 130252145 | 130252397 | chr9 | 27021253 | 27021353 |
| chr2 | 130357854 | 130358054 | chr9 | 27165151 | 27165300 |
| chr2 | 130366152 | 130366252 | chr9 | 30895248 | 30895848 |
| chr2 | 130382419 | 130382568 | chr9 | 31250734 | 31250883 |
| chr2 | 130384568 | 130384668 | chr9 | 31251734 | 31252034 |
| chr2 | 130523587 | 130523687 | chr9 | 31778678 | 31778827 |
| chr2 | 130542572 | 130542672 | chr9 | 32072404 | 32073060 |
| chr2 | 130543321 | 130543621 | chr9 | 32209542 | 32210042 |
| chr2 | 130544172 | 130544321 | chr9 | 32210291 | 32210491 |
| chr2 | 130589465 | 130589565 | chr9 | 32406922 | 32407422 |
| chr2 | 130602375 | 130602924 | chr9 | 32561346 | 32561446 |
| chr2 | 130627871 | 130627971 | chr9 | 35076501 | 35076750 |
| chr2 | 130866426 | 130866526 | chr9 | 35132779 | 35133228 |
| chr2 | 131194417 | 131194617 | chr9 | 36591626 | 36591975 |
| chr2 | 131312705 | 131312905 | chr9 | 36948275 | 36948375 |
| chr2 | 131989990 | 131990194 | chr9 | 37012313 | 37012867 |
| chr2 | 131991245 | 131991694 | chr9 | 37637059 | 37637209 |
| chr2 | 132105188 | 132105388 | chr9 | 40134348 | 40134848 |
| chr2 | 132538258 | 132538358 | chr9 | 41022740 | 41022940 |
| chr2 | 132806798 | 132806947 | chr9 | 41444837 | 41445086 |
| chr2 | 133511629 | 133512329 | chr9 | 41989533 | 41989733 |
| chr2 | 134746160 | 134746260 | chr9 | 42128904 | 42129453 |
| chr2 | 134746609 | 134746709 | chr9 | 42265556 | 42266300 |
| chr2 | 135700060 | 135700860 | chr9 | 42477938 | 42478187 |
| chr2 | 136849498 | 136849597 | chr9 | 42971506 | 42971606 |
| chr2 | 138216617 | 138216817 | chr9 | 43609795 | 43609895 |
| chr2 | 138238823 | 138238984 | chr9 | 43971865 | 43972416 |
| chr2 | 140355365 | 140355925 | chr9 | 43999543 | 43999768 |
| chr2 | 143875602 | 143875702 | chr9 | 44116680 | 44116980 |
| chr2 | 143992932 | 143993381 | chr9 | 44170398 | 44170598 |
| chr2 | 144291842 | 144292242 | chr9 | 44185366 | 44185466 |
| chr2 | 144293197 | 144293297 | chr9 | 44198485 | 44198834 |
| chr2 | 144783396 | 144783545 | chr9 | 44244355 | 44244555 |
| chr2 | 145744173 | 145744628 | chr9 | 44306391 | 44306488 |
| chr2 | 147145890 | 147145990 | chr9 | 44362306 | 44362455 |
| chr2 | 147324990 | 147325090 | chr9 | 44391641 | 44392145 |
| chr2 | 148006500 | 148006649 | chr9 | 44600365 | 44600914 |
| chr2 | 148403066 | 148403215 | chr9 | 44633017 | 44633887 |
| chr2 | 150529064 | 150529413 | chr9 | 45004061 | 45004161 |

|      |           |           |      |          |          |
|------|-----------|-----------|------|----------|----------|
| chr2 | 150709479 | 150709628 | chr9 | 45184270 | 45184723 |
| chr2 | 150999235 | 150999335 | chr9 | 45235644 | 45235844 |
| chr2 | 151454038 | 151454338 | chr9 | 45849642 | 45849991 |
| chr2 | 151502351 | 151502451 | chr9 | 46148382 | 46148639 |
| chr2 | 151532611 | 151532811 | chr9 | 48700573 | 48700773 |
| chr2 | 151700824 | 151700924 | chr9 | 49203606 | 49203906 |
| chr2 | 151701173 | 151701273 | chr9 | 49290901 | 49291001 |
| chr2 | 151871711 | 151871811 | chr9 | 49291351 | 49291550 |
| chr2 | 151934311 | 151934511 | chr9 | 50392243 | 50392492 |
| chr2 | 151941009 | 151941509 | chr9 | 50591455 | 50592004 |
| chr2 | 152065566 | 152065766 | chr9 | 50610201 | 50610550 |
| chr2 | 152336797 | 152337046 | chr9 | 50639310 | 50639610 |
| chr2 | 152359177 | 152359426 | chr9 | 51826878 | 51828327 |
| chr2 | 152476285 | 152476485 | chr9 | 53237778 | 53238227 |
| chr2 | 152477834 | 152478434 | chr9 | 53521241 | 53521649 |
| chr2 | 152499821 | 152500321 | chr9 | 53746248 | 53746897 |
| chr2 | 152531974 | 152532474 | chr9 | 53872527 | 53872627 |
| chr2 | 152557416 | 152557765 | chr9 | 54182062 | 54182211 |
| chr2 | 152563603 | 152564852 | chr9 | 54660884 | 54661033 |
| chr2 | 152587333 | 152587433 | chr9 | 54662484 | 54662733 |
| chr2 | 152713503 | 152713903 | chr9 | 54848544 | 54848693 |
| chr2 | 152793362 | 152793673 | chr9 | 54923636 | 54923836 |
| chr2 | 152893888 | 152894088 | chr9 | 54924285 | 54924994 |
| chr2 | 152911385 | 152911585 | chr9 | 55045880 | 55046480 |
| chr2 | 153024585 | 153025344 | chr9 | 55047129 | 55047229 |
| chr2 | 153067438 | 153068638 | chr9 | 55106371 | 55106471 |
| chr2 | 153185163 | 153185263 | chr9 | 55181180 | 55181532 |
| chr2 | 153216512 | 153216661 | chr9 | 55224025 | 55224125 |
| chr2 | 153443563 | 153444563 | chr9 | 55438085 | 55438285 |
| chr2 | 153608784 | 153609084 | chr9 | 55438434 | 55438534 |
| chr2 | 153740609 | 153741109 | chr9 | 56749489 | 56749589 |
| chr2 | 153832615 | 153832715 | chr9 | 56762385 | 56762585 |
| chr2 | 153832971 | 153833264 | chr9 | 56892444 | 56892893 |
| chr2 | 153834815 | 153834964 | chr9 | 56973158 | 56973558 |
| chr2 | 153859718 | 153859867 | chr9 | 57028153 | 57028453 |
| chr2 | 153903203 | 153903702 | chr9 | 57028602 | 57028702 |
| chr2 | 154182831 | 154182931 | chr9 | 57044760 | 57044860 |
| chr2 | 154368261 | 154368661 | chr9 | 57338791 | 57339240 |
| chr2 | 154515485 | 154516134 | chr9 | 57365001 | 57365201 |
| chr2 | 154530035 | 154530435 | chr9 | 57365350 | 57365550 |
| chr2 | 154615094 | 154615243 | chr9 | 57458739 | 57458888 |
| chr2 | 155034306 | 155034506 | chr9 | 57505209 | 57505558 |
| chr2 | 155035957 | 155036106 | chr9 | 57543234 | 57543334 |

|      |           |           |      |          |          |
|------|-----------|-----------|------|----------|----------|
| chr2 | 155235494 | 155235594 | chr9 | 57662837 | 57663137 |
| chr2 | 155651963 | 155652112 | chr9 | 57808362 | 57808911 |
| chr2 | 155689017 | 155689166 | chr9 | 58056519 | 58056868 |
| chr2 | 155710958 | 155711058 | chr9 | 58210162 | 58210362 |
| chr2 | 155711207 | 155711307 | chr9 | 58452010 | 58452110 |
| chr2 | 155905447 | 155905748 | chr9 | 58479385 | 58479685 |
| chr2 | 155907098 | 155907347 | chr9 | 58934334 | 58934434 |
| chr2 | 155967848 | 155968048 | chr9 | 59383393 | 59383493 |
| chr2 | 156071707 | 156071758 | chr9 | 59384342 | 59384442 |
| chr2 | 156071907 | 156072107 | chr9 | 59577304 | 59577404 |
| chr2 | 156379082 | 156379231 | chr9 | 59648316 | 59648416 |
| chr2 | 156379782 | 156380189 | chr9 | 59847387 | 59847487 |
| chr2 | 156381138 | 156381538 | chr9 | 60038443 | 60039092 |
| chr2 | 156433967 | 156434416 | chr9 | 60610428 | 60610528 |
| chr2 | 156659109 | 156659258 | chr9 | 60692504 | 60692604 |
| chr2 | 156798307 | 156798507 | chr9 | 61811618 | 61811767 |
| chr2 | 156798656 | 156798707 | chr9 | 61844414 | 61844614 |
| chr2 | 156798856 | 156799407 | chr9 | 62181589 | 62181738 |
| chr2 | 156822871 | 156822971 | chr9 | 62238438 | 62238738 |
| chr2 | 157238836 | 157238936 | chr9 | 62754511 | 62754660 |
| chr2 | 157239485 | 157239585 | chr9 | 62878636 | 62878836 |
| chr2 | 157308177 | 157308277 | chr9 | 63046088 | 63046288 |
| chr2 | 157326348 | 157326697 | chr9 | 63046437 | 63046537 |
| chr2 | 157384023 | 157384123 | chr9 | 64070906 | 64071155 |
| chr2 | 157518953 | 157519253 | chr9 | 64075115 | 64075267 |
| chr2 | 157527792 | 157527941 | chr9 | 64179317 | 64179566 |
| chr2 | 157695892 | 157696148 | chr9 | 64238814 | 64239014 |
| chr2 | 157874305 | 157874405 | chr9 | 64283298 | 64283498 |
| chr2 | 157970038 | 157970138 | chr9 | 64849264 | 64849364 |
| chr2 | 158106123 | 158106423 | chr9 | 64850215 | 64850665 |
| chr2 | 158106572 | 158107572 | chr9 | 64856744 | 64856893 |
| chr2 | 158217320 | 158217371 | chr9 | 64930069 | 64930518 |
| chr2 | 158266424 | 158266875 | chr9 | 65038496 | 65038796 |
| chr2 | 158461899 | 158461992 | chr9 | 65112170 | 65112619 |
| chr2 | 158462699 | 158462999 | chr9 | 65191631 | 65191880 |
| chr2 | 158570331 | 158570431 | chr9 | 65477648 | 65477797 |
| chr2 | 160287025 | 160287225 | chr9 | 65527238 | 65527898 |
| chr2 | 160287374 | 160287778 | chr9 | 65957476 | 65958225 |
| chr2 | 160690740 | 160691140 | chr9 | 66489699 | 66489799 |
| chr2 | 160832521 | 160832770 | chr9 | 66609211 | 66609460 |
| chr2 | 160872508 | 160872608 | chr9 | 66691593 | 66691693 |
| chr2 | 162620678 | 162620778 | chr9 | 66692242 | 66692342 |
| chr2 | 162946376 | 162946825 | chr9 | 66815657 | 66815757 |



|      |           |           |      |          |          |
|------|-----------|-----------|------|----------|----------|
| chr2 | 163014065 | 163014965 | chr9 | 66816006 | 66816206 |
| chr2 | 163357581 | 163357930 | chr9 | 66945383 | 66945683 |
| chr2 | 163358981 | 163359391 | chr9 | 66946232 | 66946332 |
| chr2 | 163379750 | 163379850 | chr9 | 69294462 | 69294711 |
| chr2 | 163432159 | 163432608 | chr9 | 69657277 | 69657426 |
| chr2 | 163506373 | 163507073 | chr9 | 69909099 | 69909299 |
| chr2 | 163507522 | 163507622 | chr9 | 70103299 | 70103799 |
| chr2 | 163562705 | 163562805 | chr9 | 70317604 | 70317953 |
| chr2 | 163604811 | 163605011 | chr9 | 70575228 | 70575328 |
| chr2 | 163654167 | 163654416 | chr9 | 71111902 | 71112502 |
| chr2 | 163654467 | 163654516 | chr9 | 71382719 | 71383019 |
| chr2 | 163768818 | 163769074 | chr9 | 71668705 | 71668805 |
| chr2 | 163813500 | 163813700 | chr9 | 71669656 | 71669756 |
| chr2 | 163955027 | 163955127 | chr9 | 71670005 | 71670417 |
| chr2 | 164031282 | 164031382 | chr9 | 72009122 | 72009222 |
| chr2 | 164032433 | 164033482 | chr9 | 72171839 | 72171939 |
| chr2 | 164151138 | 164151538 | chr9 | 72558993 | 72559193 |
| chr2 | 164160597 | 164160897 | chr9 | 72704694 | 72705594 |
| chr2 | 164181840 | 164182140 | chr9 | 72883960 | 72884409 |
| chr2 | 164197796 | 164198248 | chr9 | 74769930 | 74770430 |
| chr2 | 164362688 | 164363137 | chr9 | 75219599 | 75219699 |
| chr2 | 164366055 | 164366413 | chr9 | 75256990 | 75257190 |
| chr2 | 164421027 | 164421176 | chr9 | 75468911 | 75469011 |
| chr2 | 164440192 | 164440235 | chr9 | 75508387 | 75508587 |
| chr2 | 164520959 | 164521159 | chr9 | 75924281 | 75924381 |
| chr2 | 164521810 | 164522159 | chr9 | 75924530 | 75924681 |
| chr2 | 164545921 | 164546021 | chr9 | 77454380 | 77454480 |
| chr2 | 164572194 | 164573543 | chr9 | 77565003 | 77565652 |
| chr2 | 164599297 | 164599450 | chr9 | 78278133 | 78278233 |
| chr2 | 164674804 | 164675004 | chr9 | 78307288 | 78307393 |
| chr2 | 164705109 | 164705609 | chr9 | 78352816 | 78353216 |
| chr2 | 164739029 | 164739729 | chr9 | 78526060 | 78526160 |
| chr2 | 164739978 | 164740129 | chr9 | 79669383 | 79669732 |
| chr2 | 164740278 | 164741481 | chr9 | 80074569 | 80074669 |
| chr2 | 164762908 | 164763208 | chr9 | 80075321 | 80075432 |
| chr2 | 164780780 | 164782931 | chr9 | 81622648 | 81622948 |
| chr2 | 164790667 | 164791116 | chr9 | 81623697 | 81623897 |
| chr2 | 164792267 | 164792967 | chr9 | 81854039 | 81854488 |
| chr2 | 164817003 | 164817103 | chr9 | 83538751 | 83538851 |
| chr2 | 164817252 | 164817752 | chr9 | 83825036 | 83825136 |
| chr2 | 164906145 | 164906794 | chr9 | 85836085 | 85836585 |
| chr2 | 164907845 | 164907994 | chr9 | 86562448 | 86562548 |
| chr2 | 164928262 | 164928562 | chr9 | 86685581 | 86685881 |

|      |           |           |      |           |           |
|------|-----------|-----------|------|-----------|-----------|
| chr2 | 165276788 | 165277837 | chr9 | 86872547  | 86872647  |
| chr2 | 165322514 | 165322763 | chr9 | 88318822  | 88319035  |
| chr2 | 165322914 | 165323314 | chr9 | 88430761  | 88430861  |
| chr2 | 165434151 | 165434854 | chr9 | 89615218  | 89615518  |
| chr2 | 166752661 | 166752761 | chr9 | 89901157  | 89901357  |
| chr2 | 166865790 | 166865890 | chr9 | 92527456  | 92528056  |
| chr2 | 166975115 | 166975215 | chr9 | 92528505  | 92528806  |
| chr2 | 166975364 | 166975564 | chr9 | 94530245  | 94530445  |
| chr2 | 167200232 | 167200381 | chr9 | 95550802  | 95550902  |
| chr2 | 167309327 | 167309527 | chr9 | 95629119  | 95629219  |
| chr2 | 167496421 | 167496670 | chr9 | 96187633  | 96187833  |
| chr2 | 167498370 | 167498470 | chr9 | 96187982  | 96188282  |
| chr2 | 167646709 | 167647309 | chr9 | 96429924  | 96430173  |
| chr2 | 167650666 | 167651015 | chr9 | 96623128  | 96623228  |
| chr2 | 167892517 | 167892617 | chr9 | 96623879  | 96624228  |
| chr2 | 168549778 | 168549927 | chr9 | 96722661  | 96722961  |
| chr2 | 168550078 | 168550927 | chr9 | 96743913  | 96744066  |
| chr2 | 168562550 | 168562650 | chr9 | 96744113  | 96744762  |
| chr2 | 168915754 | 168916154 | chr9 | 97102676  | 97102776  |
| chr2 | 169540424 | 169540524 | chr9 | 98025102  | 98025202  |
| chr2 | 169593682 | 169593931 | chr9 | 98287786  | 98288086  |
| chr2 | 170091164 | 170091264 | chr9 | 99131922  | 99132022  |
| chr2 | 170388823 | 170389023 | chr9 | 99350965  | 99351665  |
| chr2 | 170389372 | 170389572 | chr9 | 99427697  | 99427797  |
| chr2 | 170456122 | 170456271 | chr9 | 99428346  | 99428446  |
| chr2 | 170562661 | 170562761 | chr9 | 99560035  | 99560335  |
| chr2 | 170563112 | 170563261 | chr9 | 99702350  | 99702550  |
| chr2 | 172002961 | 172003910 | chr9 | 100634629 | 100634729 |
| chr2 | 172330846 | 172331046 | chr9 | 102454434 | 102454634 |
| chr2 | 172352111 | 172352660 | chr9 | 102454883 | 102454983 |
| chr2 | 172417891 | 172418391 | chr9 | 102575433 | 102575632 |
| chr2 | 172419240 | 172419291 | chr9 | 102685857 | 102686206 |
| chr2 | 172556892 | 172557192 | chr9 | 102779998 | 102780147 |
| chr2 | 172987325 | 172987625 | chr9 | 102781498 | 102781947 |
| chr2 | 173008099 | 173008548 | chr9 | 102954429 | 102954729 |
| chr2 | 173226453 | 173227302 | chr9 | 103058932 | 103059032 |
| chr2 | 173284096 | 173284296 | chr9 | 103234807 | 103235207 |
| chr2 | 173668272 | 173668372 | chr9 | 103235667 | 103235856 |
| chr2 | 174082983 | 174083683 | chr9 | 103426338 | 103426787 |
| chr2 | 174084250 | 174084301 | chr9 | 103708000 | 103708349 |
| chr2 | 174084550 | 174084750 | chr9 | 104009117 | 104009266 |
| chr2 | 174116427 | 174116776 | chr9 | 104516547 | 104516796 |
| chr2 | 174291283 | 174291483 | chr9 | 105341681 | 105341930 |

|      |           |           |      |           |           |
|------|-----------|-----------|------|-----------|-----------|
| chr2 | 174480604 | 174480704 | chr9 | 105441808 | 105441908 |
| chr2 | 174768684 | 174768835 | chr9 | 105443259 | 105443408 |
| chr2 | 174768984 | 174769084 | chr9 | 105757871 | 105758057 |
| chr2 | 177681618 | 177681767 | chr9 | 106145003 | 106145203 |
| chr2 | 177969308 | 177969408 | chr9 | 106167258 | 106167710 |
| chr2 | 177969557 | 177969665 | chr9 | 106194117 | 106194217 |
| chr2 | 179565348 | 179565548 | chr9 | 106314492 | 106315192 |
| chr2 | 179644775 | 179645675 | chr9 | 106375801 | 106376050 |
| chr2 | 179657474 | 179657823 | chr9 | 106631928 | 106632028 |
| chr2 | 179829381 | 179829830 | chr9 | 106735595 | 106735695 |
| chr2 | 180129062 | 180129162 | chr9 | 106768736 | 106768853 |
| chr2 | 180137145 | 180137394 | chr9 | 106833966 | 106834066 |
| chr2 | 180137945 | 180138245 | chr9 | 106838825 | 106838925 |
| chr2 | 180506870 | 180507719 | chr9 | 107178569 | 107178669 |
| chr2 | 180578928 | 180579028 | chr9 | 107235938 | 107236287 |
| chr2 | 180579079 | 180579228 | chr9 | 107286556 | 107287205 |
| chr2 | 180696517 | 180696666 | chr9 | 107486786 | 107487187 |
| chr2 | 180827917 | 180828117 | chr9 | 107488687 | 107488836 |
| chr2 | 180903230 | 180903381 | chr9 | 107490236 | 107490336 |
| chr2 | 180920486 | 180920586 | chr9 | 107492871 | 107493071 |
| chr2 | 181033561 | 181033661 | chr9 | 107499616 | 107499873 |
| chr2 | 181138650 | 181138950 | chr9 | 107500916 | 107501016 |
| chr2 | 181211112 | 181211212 | chr9 | 107509615 | 107510015 |
| chr2 | 181211561 | 181211661 | chr9 | 107514523 | 107514972 |
| chr1 | 3661079   | 3661928   | chr9 | 107521912 | 107522112 |
| chr1 | 5009967   | 5010716   | chr9 | 107523161 | 107523762 |
| chr1 | 9294486   | 9294735   | chr9 | 107613884 | 107614292 |
| chr1 | 9694802   | 9695002   | chr9 | 107656785 | 107657385 |
| chr1 | 9695651   | 9695751   | chr9 | 107819208 | 107819408 |
| chr1 | 12712041  | 12712241  | chr9 | 107882480 | 107882929 |
| chr1 | 12986788  | 12988037  | chr9 | 107896574 | 107896782 |
| chr1 | 13370716  | 13370969  | chr9 | 107993869 | 107994069 |
| chr1 | 13584761  | 13584961  | chr9 | 107999919 | 108000168 |
| chr1 | 13655357  | 13656329  | chr9 | 108024164 | 108024813 |
| chr1 | 15800705  | 15800905  | chr9 | 108041012 | 108041361 |
| chr1 | 20815224  | 20815373  | chr9 | 108138125 | 108138582 |
| chr1 | 20816549  | 20816998  | chr9 | 108210554 | 108210654 |
| chr1 | 21075721  | 21075879  | chr9 | 108242640 | 108243691 |
| chr1 | 22864927  | 22865327  | chr9 | 108243840 | 108243940 |
| chr1 | 23819328  | 23819428  | chr9 | 108294036 | 108294336 |
| chr1 | 24236552  | 24237152  | chr9 | 108294785 | 108294885 |
| chr1 | 24645272  | 24646119  | chr9 | 108407311 | 108407460 |
| chr1 | 25999051  | 25999151  | chr9 | 108437655 | 108437755 |

|      |          |          |      |           |           |
|------|----------|----------|------|-----------|-----------|
| chr1 | 25999600 | 25999700 | chr9 | 108515214 | 108515465 |
| chr1 | 33888085 | 33888185 | chr9 | 108544906 | 108545006 |
| chr1 | 33926407 | 33926507 | chr9 | 108596138 | 108596238 |
| chr1 | 34076465 | 34076665 | chr9 | 108596687 | 108596787 |
| chr1 | 34077514 | 34077614 | chr9 | 108639381 | 108639481 |
| chr1 | 34181217 | 34181417 | chr9 | 108742381 | 108742481 |
| chr1 | 34608392 | 34608692 | chr9 | 108755718 | 108755918 |
| chr1 | 34628902 | 34629251 | chr9 | 108884069 | 108884218 |
| chr1 | 34847680 | 34847780 | chr9 | 108899897 | 108899997 |
| chr1 | 36237369 | 36237569 | chr9 | 108937216 | 108938168 |
| chr1 | 36443982 | 36444531 | chr9 | 109002488 | 109002956 |
| chr1 | 36641315 | 36641515 | chr9 | 109021882 | 109021982 |
| chr1 | 36679468 | 36679572 | chr9 | 109042113 | 109042313 |
| chr1 | 36680819 | 36680919 | chr9 | 109183651 | 109184017 |
| chr1 | 36878669 | 36878918 | chr9 | 109835217 | 109835417 |
| chr1 | 37387704 | 37387853 | chr9 | 110076914 | 110077214 |
| chr1 | 37527162 | 37527311 | chr9 | 110091540 | 110091740 |
| chr1 | 37537709 | 37538609 | chr9 | 110204691 | 110204991 |
| chr1 | 38167153 | 38167353 | chr9 | 110379362 | 110379562 |
| chr1 | 38299255 | 38299355 | chr9 | 110584085 | 110584185 |
| chr1 | 39648028 | 39648128 | chr9 | 110616394 | 110616843 |
| chr1 | 39648879 | 39649528 | chr9 | 110702292 | 110702492 |
| chr1 | 39746598 | 39746698 | chr9 | 110703546 | 110703746 |
| chr1 | 39819975 | 39820026 | chr9 | 110794479 | 110794579 |
| chr1 | 40392223 | 40392423 | chr9 | 110838565 | 110838814 |
| chr1 | 40392572 | 40392623 | chr9 | 110840314 | 110840465 |
| chr1 | 40392972 | 40393072 | chr9 | 110907809 | 110907913 |
| chr1 | 40634849 | 40635298 | chr9 | 111231520 | 111231720 |
| chr1 | 40850455 | 40850555 | chr9 | 111232569 | 111232669 |
| chr1 | 42866338 | 42866638 | chr9 | 111649835 | 111650384 |
| chr1 | 43121906 | 43122006 | chr9 | 113780623 | 113780776 |
| chr1 | 43900063 | 43900163 | chr9 | 113901460 | 113901563 |
| chr1 | 44719336 | 44719785 | chr9 | 113995789 | 113995889 |
| chr1 | 51096814 | 51097114 | chr9 | 113996338 | 113996438 |
| chr1 | 52669649 | 52669849 | chr9 | 114370857 | 114370957 |
| chr1 | 52671300 | 52671449 | chr9 | 114658068 | 114658168 |
| chr1 | 52986180 | 52986280 | chr9 | 115281663 | 115281825 |
| chr1 | 53231105 | 53231254 | chr9 | 116144824 | 116144924 |
| chr1 | 53521342 | 53521491 | chr9 | 117222639 | 117222792 |
| chr1 | 53954144 | 53954344 | chr9 | 118119218 | 118119618 |
| chr1 | 55300246 | 55300346 | chr9 | 118121374 | 118121468 |
| chr1 | 57140886 | 57141086 | chr9 | 118894790 | 118895039 |
| chr1 | 58447067 | 58447467 | chr9 | 119022688 | 119022788 |

|      |          |          |      |           |           |
|------|----------|----------|------|-----------|-----------|
| chr1 | 58447816 | 58447916 | chr9 | 119062534 | 119062734 |
| chr1 | 58673661 | 58674110 | chr9 | 119128241 | 119128390 |
| chr1 | 58864851 | 58865048 | chr9 | 119178424 | 119178524 |
| chr1 | 59289497 | 59289597 | chr9 | 119201574 | 119201762 |
| chr1 | 59466077 | 59466726 | chr9 | 119794798 | 119794898 |
| chr1 | 59685405 | 59685854 | chr9 | 119864332 | 119864632 |
| chr1 | 59932281 | 59932381 | chr9 | 119955396 | 119955546 |
| chr1 | 59933135 | 59933235 | chr9 | 120061370 | 120061870 |
| chr1 | 60082905 | 60083105 | chr9 | 120079636 | 120079836 |
| chr1 | 60212578 | 60212782 | chr9 | 120097125 | 120097474 |
| chr1 | 62861581 | 62861681 | chr9 | 120272010 | 120272210 |
| chr1 | 62862530 | 62862630 | chr9 | 120272659 | 120273110 |
| chr1 | 63603175 | 63603375 | chr9 | 120509729 | 120509829 |
| chr1 | 64691075 | 64691175 | chr9 | 120541153 | 120541253 |
| chr1 | 64896671 | 64896771 | chr9 | 120901012 | 120901412 |
| chr1 | 65222637 | 65222833 | chr9 | 120901567 | 120902771 |
| chr1 | 66860732 | 66860832 | chr9 | 121612402 | 121612502 |
| chr1 | 66977003 | 66977103 | chr9 | 121686918 | 121687067 |
| chr1 | 66977652 | 66977752 | chr9 | 121885429 | 121885529 |
| chr1 | 67198305 | 67198605 | chr9 | 121921127 | 121921220 |
| chr1 | 69847494 | 69847643 | chr9 | 122320874 | 122320974 |
| chr1 | 69986927 | 69987276 | chr9 | 122768928 | 122769228 |
| chr1 | 72871032 | 72871681 | chr9 | 122835089 | 122835506 |
| chr1 | 72981123 | 72981472 | chr9 | 122835655 | 122836055 |
| chr1 | 72982765 | 72983414 | chr9 | 123230332 | 123230432 |
| chr1 | 73175613 | 73175862 | chr9 | 123499219 | 123499619 |
| chr1 | 74284281 | 74284630 | chr9 | 123499768 | 123499868 |
| chr1 | 74354176 | 74355025 | chr9 | 123687295 | 123687544 |
| chr1 | 74436840 | 74436940 | chr8 | 3279276   | 3279476   |
| chr1 | 74444674 | 74444923 | chr8 | 3392707   | 3392956   |
| chr1 | 74535569 | 74535618 | chr8 | 3393207   | 3393456   |
| chr1 | 74551539 | 74551757 | chr8 | 3492870   | 3492970   |
| chr1 | 74568399 | 74569195 | chr8 | 3500518   | 3500967   |
| chr1 | 74748050 | 74748150 | chr8 | 3588024   | 3588124   |
| chr1 | 74821794 | 74821894 | chr8 | 3631049   | 3631449   |
| chr1 | 74873321 | 74873770 | chr8 | 4166396   | 4166896   |
| chr1 | 74908218 | 74909067 | chr8 | 4207531   | 4208331   |
| chr1 | 74930898 | 74930998 | chr8 | 4238689   | 4238789   |
| chr1 | 74932057 | 74932357 | chr8 | 4239138   | 4239238   |
| chr1 | 74951656 | 74951905 | chr8 | 4260010   | 4260110   |
| chr1 | 75243491 | 75243991 | chr8 | 4324506   | 4324606   |
| chr1 | 75252586 | 75252686 | chr8 | 4493003   | 4493103   |
| chr1 | 75328855 | 75329455 | chr8 | 8661277   | 8661577   |

|      |          |          |      |          |          |
|------|----------|----------|------|----------|----------|
| chr1 | 75329904 | 75330255 | chr8 | 8690498  | 8690698  |
| chr1 | 75330504 | 75330704 | chr8 | 9977551  | 9978051  |
| chr1 | 75429139 | 75429439 | chr8 | 10006784 | 10006933 |
| chr1 | 75544385 | 75544685 | chr8 | 11311651 | 11312151 |
| chr1 | 75560100 | 75560500 | chr8 | 11313100 | 11313751 |
| chr1 | 75615078 | 75615278 | chr8 | 11314000 | 11314500 |
| chr1 | 75654397 | 75654497 | chr8 | 11478227 | 11478376 |
| chr1 | 75655897 | 75656197 | chr8 | 11839597 | 11840248 |
| chr1 | 75656446 | 75656746 | chr8 | 12384831 | 12385039 |
| chr1 | 77626590 | 77626742 | chr8 | 12396437 | 12396837 |
| chr1 | 78306639 | 78306739 | chr8 | 12671623 | 12671823 |
| chr1 | 78598798 | 78599005 | chr8 | 12914829 | 12914880 |
| chr1 | 78625719 | 78626019 | chr8 | 12916139 | 12916429 |
| chr1 | 79875358 | 79875507 | chr8 | 13035389 | 13035589 |
| chr1 | 80454938 | 80455038 | chr8 | 13106414 | 13106514 |
| chr1 | 82953308 | 82953408 | chr8 | 13287535 | 13287635 |
| chr1 | 84398316 | 84398465 | chr8 | 13338596 | 13338796 |
| chr1 | 84399424 | 84399573 | chr8 | 13396301 | 13396901 |
| chr1 | 84810046 | 84810195 | chr8 | 13397150 | 13397450 |
| chr1 | 85225977 | 85226327 | chr8 | 13403753 | 13404152 |
| chr1 | 87560283 | 87560732 | chr8 | 13404703 | 13404952 |
| chr1 | 87983893 | 87984049 | chr8 | 13757712 | 13757812 |
| chr1 | 88265049 | 88265149 | chr8 | 13890142 | 13890942 |
| chr1 | 88265498 | 88265798 | chr8 | 13974213 | 13974313 |
| chr1 | 88351320 | 88351420 | chr8 | 14090724 | 14091083 |
| chr1 | 88486763 | 88486863 | chr8 | 14095797 | 14095897 |
| chr1 | 88632600 | 88633019 | chr8 | 14096246 | 14096346 |
| chr1 | 89117706 | 89117906 | chr8 | 14888960 | 14889360 |
| chr1 | 89118455 | 89118555 | chr8 | 17535453 | 17535653 |
| chr1 | 89150715 | 89150864 | chr8 | 22815867 | 22815967 |
| chr1 | 89151015 | 89151464 | chr8 | 22941218 | 22941467 |
| chr1 | 89152415 | 89152964 | chr8 | 23039050 | 23039299 |
| chr1 | 89166488 | 89166688 | chr8 | 23232429 | 23232529 |
| chr1 | 89167437 | 89168237 | chr8 | 23408413 | 23408562 |
| chr1 | 89288731 | 89289031 | chr8 | 23560930 | 23561279 |
| chr1 | 89472474 | 89472574 | chr8 | 23563430 | 23563579 |
| chr1 | 89581057 | 89581157 | chr8 | 23814025 | 23814125 |
| chr1 | 89582506 | 89582806 | chr8 | 23963894 | 23964094 |
| chr1 | 89970379 | 89970479 | chr8 | 23992558 | 23992807 |
| chr1 | 90162789 | 90163049 | chr8 | 25482624 | 25483183 |
| chr1 | 90171937 | 90172286 | chr8 | 25771778 | 25772078 |
| chr1 | 90239499 | 90239599 | chr8 | 25857331 | 25857531 |
| chr1 | 90264060 | 90264709 | chr8 | 25958148 | 25958448 |

|      |           |           |      |          |          |
|------|-----------|-----------|------|----------|----------|
| chr1 | 90367697  | 90368597  | chr8 | 26285879 | 26286528 |
| chr1 | 90369146  | 90369446  | chr8 | 26541157 | 26541661 |
| chr1 | 90664671  | 90664871  | chr8 | 26701530 | 26701630 |
| chr1 | 92164081  | 92164830  | chr8 | 26913511 | 26913711 |
| chr1 | 92875854  | 92876203  | chr8 | 27778976 | 27779225 |
| chr1 | 92931968  | 92932168  | chr8 | 27985096 | 27985250 |
| chr1 | 92932917  | 92933017  | chr8 | 28015109 | 28015309 |
| chr1 | 93259085  | 93259585  | chr8 | 31844170 | 31844570 |
| chr1 | 93328537  | 93328937  | chr8 | 31845019 | 31845119 |
| chr1 | 93457324  | 93457424  | chr8 | 31923833 | 31924182 |
| chr1 | 93503012  | 93503212  | chr8 | 31925233 | 31925382 |
| chr1 | 94444567  | 94444716  | chr8 | 31942246 | 31942695 |
| chr1 | 94559268  | 94559417  | chr8 | 34141182 | 34142033 |
| chr1 | 94570886  | 94571035  | chr8 | 34354133 | 34354233 |
| chr1 | 94582155  | 94582755  | chr8 | 34406867 | 34407316 |
| chr1 | 94793933  | 94794333  | chr8 | 34486850 | 34486999 |
| chr1 | 94865154  | 94865803  | chr8 | 34685176 | 34685376 |
| chr1 | 94895755  | 94896004  | chr8 | 34815534 | 34815783 |
| chr1 | 94940768  | 94940868  | chr8 | 34817634 | 34817793 |
| chr1 | 94941217  | 94942317  | chr8 | 34853944 | 34854044 |
| chr1 | 95123296  | 95124596  | chr8 | 34854193 | 34854293 |
| chr1 | 95196937  | 95197337  | chr8 | 34862293 | 34862393 |
| chr1 | 95269818  | 95270173  | chr8 | 35463500 | 35464338 |
| chr1 | 95305994  | 95306243  | chr8 | 36153021 | 36153121 |
| chr1 | 95336141  | 95337027  | chr8 | 36484084 | 36484584 |
| chr1 | 95598447  | 95598647  | chr8 | 36751951 | 36752151 |
| chr1 | 95648241  | 95648341  | chr8 | 36752400 | 36752451 |
| chr1 | 95787640  | 95787889  | chr8 | 36752700 | 36752900 |
| chr1 | 95952652  | 95953652  | chr8 | 37610227 | 37610376 |
| chr1 | 96015850  | 96016150  | chr8 | 40958247 | 40958347 |
| chr1 | 98960008  | 98960157  | chr8 | 41096054 | 41096154 |
| chr1 | 99624973  | 99625073  | chr8 | 41597955 | 41598204 |
| chr1 | 107322077 | 107322177 | chr8 | 41910263 | 41910612 |
| chr1 | 107629419 | 107629519 | chr8 | 42046518 | 42046767 |
| chr1 | 107629968 | 107630168 | chr8 | 43979000 | 43979400 |
| chr1 | 107746378 | 107746478 | chr8 | 46004587 | 46004736 |
| chr1 | 108679969 | 108680169 | chr8 | 46557375 | 46557624 |
| chr1 | 108681120 | 108681320 | chr8 | 46646523 | 46646623 |
| chr1 | 108681485 | 108681569 | chr8 | 46646776 | 46646984 |
| chr1 | 108826586 | 108826686 | chr8 | 46966262 | 46966711 |
| chr1 | 108826835 | 108827035 | chr8 | 47289039 | 47289139 |
| chr1 | 108827086 | 108827235 | chr8 | 47657915 | 47658371 |
| chr1 | 111948343 | 111948792 | chr8 | 48024388 | 48024488 |

|      |           |           |      |          |          |
|------|-----------|-----------|------|----------|----------|
| chr1 | 120276640 | 120277089 | chr8 | 48205648 | 48205848 |
| chr1 | 121470436 | 121470536 | chr8 | 48386039 | 48386439 |
| chr1 | 121470885 | 121471285 | chr8 | 48780587 | 48780849 |
| chr1 | 121489774 | 121490323 | chr8 | 54749135 | 54749235 |
| chr1 | 121971085 | 121971834 | chr8 | 55221039 | 55221393 |
| chr1 | 122088052 | 122088308 | chr8 | 55222539 | 55222695 |
| chr1 | 122114610 | 122114959 | chr8 | 55273091 | 55273241 |
| chr1 | 122230915 | 122231215 | chr8 | 58626904 | 58627008 |
| chr1 | 122305805 | 122306554 | chr8 | 59386755 | 59386955 |
| chr1 | 122568561 | 122568710 | chr8 | 59553358 | 59553558 |
| chr1 | 123533585 | 123533636 | chr8 | 59576828 | 59577428 |
| chr1 | 126011030 | 126011130 | chr8 | 60978255 | 60978355 |
| chr1 | 126011379 | 126011679 | chr8 | 62697937 | 62698037 |
| chr1 | 127526243 | 127527092 | chr8 | 63048763 | 63049063 |
| chr1 | 128458284 | 128458684 | chr8 | 63289460 | 63289660 |
| chr1 | 129271369 | 129271669 | chr8 | 66758391 | 66758692 |
| chr1 | 129643378 | 129643578 | chr8 | 67057594 | 67057994 |
| chr1 | 130209896 | 130209996 | chr8 | 67129921 | 67130019 |
| chr1 | 131238581 | 131238681 | chr8 | 67737033 | 67737282 |
| chr1 | 132388117 | 132388217 | chr8 | 68605116 | 68605466 |
| chr1 | 132427892 | 132428092 | chr8 | 68630264 | 68630364 |
| chr1 | 132628407 | 132628759 | chr8 | 68822656 | 68822813 |
| chr1 | 132682822 | 132683171 | chr8 | 68822956 | 68823105 |
| chr1 | 132877956 | 132878353 | chr8 | 69642911 | 69643011 |
| chr1 | 132904349 | 132904549 | chr8 | 70093183 | 70093532 |
| chr1 | 132905098 | 132905401 | chr8 | 70997462 | 70997862 |
| chr1 | 133491594 | 133492099 | chr8 | 71926544 | 71926644 |
| chr1 | 133492648 | 133492748 | chr8 | 71927495 | 71927944 |
| chr1 | 133493899 | 133494048 | chr8 | 71951470 | 71951670 |
| chr1 | 133564621 | 133565021 | chr8 | 72020576 | 72020676 |
| chr1 | 133709629 | 133709878 | chr8 | 72114673 | 72114973 |
| chr1 | 133936465 | 133936665 | chr8 | 72161221 | 72161370 |
| chr1 | 133973103 | 133973203 | chr8 | 72202337 | 72202537 |
| chr1 | 134033690 | 134033790 | chr8 | 72353390 | 72353490 |
| chr1 | 134356389 | 134356689 | chr8 | 72400858 | 72401058 |
| chr1 | 134440987 | 134441136 | chr8 | 72441704 | 72442704 |
| chr1 | 134844062 | 134844411 | chr8 | 72491966 | 72492315 |
| chr1 | 134845762 | 134845962 | chr8 | 72557882 | 72558284 |
| chr1 | 135274441 | 135274690 | chr8 | 72595701 | 72595801 |
| chr1 | 135291268 | 135291368 | chr8 | 72609964 | 72610113 |
| chr1 | 135292117 | 135293017 | chr8 | 72628778 | 72628878 |
| chr1 | 135328594 | 135329094 | chr8 | 72646335 | 72646435 |
| chr1 | 135360126 | 135360575 | chr8 | 72658110 | 72658459 |



|      |           |           |      |          |          |
|------|-----------|-----------|------|----------|----------|
| chr1 | 135730379 | 135730982 | chr8 | 72726582 | 72726882 |
| chr1 | 135884515 | 135885464 | chr8 | 72735386 | 72735486 |
| chr1 | 136086543 | 136086833 | chr8 | 72750502 | 72750802 |
| chr1 | 136157223 | 136157872 | chr8 | 72778840 | 72779040 |
| chr1 | 136170290 | 136170539 | chr8 | 72879879 | 72879979 |
| chr1 | 136266555 | 136266755 | chr8 | 72927403 | 72927552 |
| chr1 | 136392116 | 136392216 | chr8 | 72958678 | 72958778 |
| chr1 | 136471402 | 136471502 | chr8 | 72974243 | 72975894 |
| chr1 | 137108920 | 137109369 | chr8 | 72981735 | 72982035 |
| chr1 | 137235430 | 137235630 | chr8 | 72992099 | 72992499 |
| chr1 | 137301055 | 137301155 | chr8 | 73011582 | 73011982 |
| chr1 | 137351606 | 137351806 | chr8 | 73391142 | 73391342 |
| chr1 | 137559515 | 137559715 | chr8 | 73501542 | 73501943 |
| chr1 | 137706148 | 137706397 | chr8 | 73523424 | 73523581 |
| chr1 | 137795440 | 137795540 | chr8 | 73525024 | 73525173 |
| chr1 | 137895916 | 137896016 | chr8 | 73584031 | 73584131 |
| chr1 | 137941083 | 137941632 | chr8 | 73685210 | 73685459 |
| chr1 | 138108043 | 138108243 | chr8 | 73729708 | 73730057 |
| chr1 | 141398925 | 141399025 | chr8 | 73806060 | 73806460 |
| chr1 | 145634426 | 145634526 | chr8 | 73808309 | 73808509 |
| chr1 | 145709525 | 145709725 | chr8 | 74041303 | 74041503 |
| chr1 | 152325103 | 152325203 | chr8 | 74253900 | 74254100 |
| chr1 | 153360758 | 153360958 | chr8 | 74279808 | 74280008 |
| chr1 | 153434165 | 153434618 | chr8 | 74610671 | 74610871 |
| chr1 | 153501575 | 153502180 | chr8 | 74667628 | 74667928 |
| chr1 | 153503529 | 153503829 | chr8 | 74841916 | 74842016 |
| chr1 | 153685815 | 153686078 | chr8 | 77145228 | 77145428 |
| chr1 | 154022390 | 154022490 | chr8 | 77185234 | 77185483 |
| chr1 | 154557102 | 154557302 | chr8 | 77261598 | 77261699 |
| chr1 | 154740131 | 154740280 | chr8 | 79875574 | 79875823 |
| chr1 | 154887342 | 154887591 | chr8 | 80365467 | 80365516 |
| chr1 | 155118008 | 155118159 | chr8 | 80660100 | 80660200 |
| chr1 | 155118308 | 155118608 | chr8 | 80661149 | 80661249 |
| chr1 | 155356150 | 155357250 | chr8 | 81446163 | 81446263 |
| chr1 | 155481973 | 155482122 | chr8 | 81863045 | 81863194 |
| chr1 | 155583078 | 155583978 | chr8 | 83032883 | 83033080 |
| chr1 | 155585278 | 155585427 | chr8 | 85014806 | 85015306 |
| chr1 | 155672389 | 155672489 | chr8 | 85446103 | 85446154 |
| chr1 | 155672638 | 155672838 | chr8 | 85448403 | 85448503 |
| chr1 | 155782694 | 155783043 | chr8 | 85505164 | 85505664 |
| chr1 | 155806486 | 155806835 | chr8 | 85600011 | 85600613 |
| chr1 | 155830838 | 155830945 | chr8 | 85615642 | 85616091 |
| chr1 | 157349235 | 157349335 | chr8 | 85698638 | 85698738 |

|      |           |           |      |          |          |
|------|-----------|-----------|------|----------|----------|
| chr1 | 157744741 | 157744890 | chr8 | 85765586 | 85765686 |
| chr1 | 158581933 | 158582333 | chr8 | 86283930 | 86284130 |
| chr1 | 158582982 | 158583082 | chr8 | 86304300 | 86305351 |
| chr1 | 158697392 | 158697441 | chr8 | 86306200 | 86306300 |
| chr1 | 158743886 | 158743986 | chr8 | 86394684 | 86394784 |
| chr1 | 158744435 | 158744535 | chr8 | 86820041 | 86820190 |
| chr1 | 158862307 | 158862556 | chr8 | 86859136 | 86859385 |
| chr1 | 162066071 | 162066520 | chr8 | 86878699 | 86879099 |
| chr1 | 162067471 | 162068020 | chr8 | 86880948 | 86881148 |
| chr1 | 162176927 | 162178127 | chr8 | 86981865 | 86982065 |
| chr1 | 162218944 | 162219294 | chr8 | 86997983 | 86998385 |
| chr1 | 162816572 | 162816672 | chr8 | 87004509 | 87004909 |
| chr1 | 162929662 | 162929762 | chr8 | 87066516 | 87066665 |
| chr1 | 163010973 | 163011073 | chr8 | 87095080 | 87095280 |
| chr1 | 163274500 | 163274700 | chr8 | 87103183 | 87103283 |
| chr1 | 163275752 | 163275952 | chr8 | 87103532 | 87103932 |
| chr1 | 163419342 | 163419492 | chr8 | 87125448 | 87125848 |
| chr1 | 163811580 | 163811680 | chr8 | 87136190 | 87136490 |
| chr1 | 164501217 | 164501766 | chr8 | 87148030 | 87148130 |
| chr1 | 164661055 | 164661220 | chr8 | 87148279 | 87148479 |
| chr1 | 164836936 | 164837285 | chr8 | 87148530 | 87148679 |
| chr1 | 166137064 | 166137213 | chr8 | 87170784 | 87171133 |
| chr1 | 166271041 | 166271141 | chr8 | 87184571 | 87184920 |
| chr1 | 166271395 | 166271590 | chr8 | 87217742 | 87218391 |
| chr1 | 167183860 | 167183960 | chr8 | 87457532 | 87457932 |
| chr1 | 167484994 | 167485143 | chr8 | 87590026 | 87590126 |
| chr1 | 167659308 | 167660008 | chr8 | 87650014 | 87650414 |
| chr1 | 168027145 | 168027362 | chr8 | 87998099 | 87998399 |
| chr1 | 168151685 | 168151834 | chr8 | 87998648 | 87998848 |
| chr1 | 168334372 | 168334624 | chr8 | 89629989 | 89630089 |
| chr1 | 169024163 | 169024465 | chr8 | 89631038 | 89631138 |
| chr1 | 169025314 | 169025514 | chr8 | 90295577 | 90295877 |
| chr1 | 169308663 | 169308763 | chr8 | 90429818 | 90429918 |
| chr1 | 169416884 | 169417084 | chr8 | 90445668 | 90445768 |
| chr1 | 172256157 | 172256506 | chr8 | 90446968 | 90447217 |
| chr1 | 172667927 | 172668127 | chr8 | 90452330 | 90452379 |
| chr1 | 172937528 | 172938028 | chr8 | 90519898 | 90519998 |
| chr1 | 173235756 | 173235905 | chr8 | 90855116 | 90855216 |
| chr1 | 173247801 | 173247952 | chr8 | 93293461 | 93294261 |
| chr1 | 173248501 | 173248850 | chr8 | 93959056 | 93959256 |
| chr1 | 173257636 | 173258085 | chr8 | 94984297 | 94984446 |
| chr1 | 173272399 | 173272548 | chr8 | 94985997 | 94986197 |
| chr1 | 173293405 | 173293754 | chr8 | 95969840 | 95969940 |

|      |           |           |      |           |           |
|------|-----------|-----------|------|-----------|-----------|
| chr1 | 173351604 | 173351754 | chr8 | 96171562  | 96171662  |
| chr1 | 173410847 | 173411248 | chr8 | 96195461  | 96195561  |
| chr1 | 173412699 | 173412799 | chr8 | 96195910  | 96196210  |
| chr1 | 173704198 | 173704291 | chr8 | 96295542  | 96295791  |
| chr1 | 174051106 | 174051206 | chr8 | 96545219  | 96545419  |
| chr1 | 174222702 | 174223052 | chr8 | 96683037  | 96683137  |
| chr1 | 174321251 | 174322551 | chr8 | 96691198  | 96691398  |
| chr1 | 174322700 | 174323300 | chr8 | 96760150  | 96760255  |
| chr1 | 174334693 | 174335042 | chr8 | 96761104  | 96761204  |
| chr1 | 174504703 | 174504952 | chr8 | 96825333  | 96825433  |
| chr1 | 174522606 | 174522750 | chr8 | 96854662  | 96855162  |
| chr1 | 174522999 | 174523750 | chr8 | 96903460  | 96903560  |
| chr1 | 174658398 | 174658498 | chr8 | 96930408  | 96930608  |
| chr1 | 175239539 | 175239688 | chr8 | 96997136  | 96997236  |
| chr1 | 175356831 | 175357280 | chr8 | 97077075  | 97077175  |
| chr1 | 175391131 | 175391334 | chr8 | 97490759  | 97490959  |
| chr1 | 176454216 | 176454316 | chr8 | 97792429  | 97792578  |
| chr1 | 177716526 | 177716626 | chr8 | 97874383  | 97874483  |
| chr1 | 178298941 | 178299041 | chr8 | 98013162  | 98013311  |
| chr1 | 180211545 | 180211745 | chr8 | 98046785  | 98047185  |
| chr1 | 180342788 | 180343190 | chr8 | 101574024 | 101574273 |
| chr1 | 180551611 | 180551711 | chr8 | 101575024 | 101575424 |
| chr1 | 180887661 | 180887861 | chr8 | 104943696 | 104943996 |
| chr1 | 182219768 | 182219968 | chr8 | 106260418 | 106260518 |
| chr1 | 182269837 | 182269937 | chr8 | 106480007 | 106480507 |
| chr1 | 182355369 | 182355469 | chr8 | 106601425 | 106601725 |
| chr1 | 182957694 | 182958694 | chr8 | 106668607 | 106668707 |
| chr1 | 182964404 | 182964504 | chr8 | 106697477 | 106698426 |
| chr1 | 183040931 | 183041031 | chr8 | 106750491 | 106750591 |
| chr1 | 183041682 | 183042131 | chr8 | 106800399 | 106800648 |
| chr1 | 183074757 | 183075222 | chr8 | 106952707 | 106952913 |
| chr1 | 183167344 | 183167501 | chr8 | 106954162 | 106954366 |
| chr1 | 183174973 | 183175022 | chr8 | 107003756 | 107003908 |
| chr1 | 183236007 | 183236107 | chr8 | 107290370 | 107290919 |
| chr1 | 184586798 | 184587647 | chr8 | 107329144 | 107329244 |
| chr1 | 184788541 | 184788941 | chr8 | 107422710 | 107422910 |
| chr1 | 186679078 | 186679555 | chr8 | 107456569 | 107456718 |
| chr1 | 186679704 | 186679804 | chr8 | 107484548 | 107484648 |
| chr1 | 186830633 | 186831134 | chr8 | 107506202 | 107506302 |
| chr1 | 186946998 | 186947098 | chr8 | 107506751 | 107507502 |
| chr1 | 187194413 | 187194813 | chr8 | 107630238 | 107630840 |
| chr1 | 187279183 | 187279545 | chr8 | 107655141 | 107655690 |
| chr1 | 187388589 | 187388989 | chr8 | 107676324 | 107676573 |

|      |           |           |      |           |           |
|------|-----------|-----------|------|-----------|-----------|
| chr1 | 188654359 | 188654659 | chr8 | 107794912 | 107795012 |
| chr1 | 188913585 | 188913785 | chr8 | 107858753 | 107859353 |
| chr1 | 190210103 | 190210303 | chr8 | 107866590 | 107866990 |
| chr1 | 190954659 | 190954759 | chr8 | 108010779 | 108011150 |
| chr1 | 191732612 | 191733012 | chr8 | 108013694 | 108013794 |
| chr1 | 192926291 | 192926491 | chr8 | 108019353 | 108019604 |
| chr1 | 193043756 | 193044205 | chr8 | 108059329 | 108059429 |
| chr1 | 193044756 | 193045156 | chr8 | 108327254 | 108327454 |
| chr1 | 193045805 | 193046005 | chr8 | 108369224 | 108369324 |
| chr1 | 193131391 | 193131491 | chr8 | 108369773 | 108369873 |
| chr1 | 193266081 | 193266330 | chr8 | 108371094 | 108371394 |
| chr1 | 193768404 | 193768504 | chr8 | 108496359 | 108496908 |
| chr1 | 194084327 | 194084527 | chr8 | 108572600 | 108572703 |
| chr1 | 194085486 | 194085586 | chr8 | 108669263 | 108669563 |
| chr1 | 194138027 | 194138276 | chr8 | 108841748 | 108842048 |
| chr1 | 196571936 | 196572036 | chr8 | 109055887 | 109056139 |
| chr7 | 3742524   | 3742819   | chr8 | 109093283 | 109093384 |
| chr7 | 3741017   | 3741866   | chr8 | 109094235 | 109094435 |
| chr9 | 3199282   | 3199382   | chr8 | 109189897 | 109189997 |
| chr9 | 4795991   | 4796291   | chr8 | 109214947 | 109215047 |
| chr9 | 7489973   | 7491273   | chr8 | 109595168 | 109595268 |
| chr9 | 8043802   | 8044255   | chr8 | 110871314 | 110871514 |
| chr9 | 13377713  | 13378413  | chr8 | 111651997 | 111652097 |
| chr9 | 14598977  | 14599228  | chr8 | 111724075 | 111724624 |
| chr9 | 14599487  | 14599577  | chr8 | 111863958 | 111864058 |
| chr9 | 14610666  | 14610766  | chr8 | 112122588 | 112122792 |
| chr9 | 14643261  | 14643510  | chr8 | 112238374 | 112238574 |
| chr9 | 14905185  | 14905285  | chr8 | 112326477 | 112326926 |
| chr9 | 14905834  | 14905934  | chr8 | 113065136 | 113065493 |
| chr9 | 15137970  | 15138070  | chr8 | 113081070 | 113081170 |
| chr9 | 15568363  | 15568612  | chr8 | 113118046 | 113118346 |
| chr9 | 15732455  | 15732755  | chr8 | 113194938 | 113195441 |
| chr9 | 15733204  | 15733404  | chr8 | 113217261 | 113217561 |
| chr9 | 20466066  | 20466415  | chr8 | 113242711 | 113242860 |
| chr9 | 20500412  | 20500761  | chr8 | 113255410 | 113255510 |
| chr9 | 20587664  | 20587965  | chr8 | 113420274 | 113420374 |
| chr9 | 20675020  | 20676269  | chr8 | 113791598 | 113791698 |
| chr9 | 20738345  | 20738945  | chr8 | 113904885 | 113905290 |
| chr9 | 20746542  | 20746991  | chr8 | 114037751 | 114037851 |
| chr9 | 20810851  | 20811500  | chr8 | 114094418 | 114094967 |
| chr9 | 20860973  | 20861173  | chr8 | 114173107 | 114173207 |
| chr9 | 20874747  | 20874796  | chr8 | 116295140 | 116295240 |
| chr9 | 20885939  | 20886988  | chr8 | 116295689 | 116295889 |

|      |          |          |      |           |           |
|------|----------|----------|------|-----------|-----------|
| chr9 | 20888388 | 20888724 | chr8 | 116367762 | 116367911 |
| chr9 | 20890675 | 20890924 | chr8 | 117869266 | 117869641 |
| chr9 | 20951873 | 20952322 | chr8 | 118895278 | 118895578 |
| chr9 | 21022476 | 21022825 | chr8 | 119083162 | 119083262 |
| chr9 | 21023683 | 21023883 | chr8 | 119141015 | 119141115 |
| chr9 | 21124140 | 21124240 | chr8 | 119154772 | 119155072 |
| chr9 | 21149754 | 21150054 | chr8 | 119244831 | 119245221 |
| chr9 | 21170942 | 21171142 | chr8 | 119963352 | 119963801 |
| chr9 | 21195237 | 21196037 | chr8 | 121505960 | 121506560 |
| chr9 | 21384700 | 21384800 | chr8 | 121556114 | 121556214 |
| chr9 | 21404771 | 21404971 | chr8 | 121663421 | 121663721 |
| chr9 | 21619034 | 21619134 | chr8 | 121664270 | 121664370 |
| chr9 | 21658503 | 21658952 | chr8 | 121827087 | 121827287 |
| chr9 | 21711051 | 21711151 | chr8 | 121827636 | 121827836 |
| chr9 | 21776656 | 21776756 | chr8 | 121939839 | 121940188 |
| chr9 | 21784656 | 21784905 | chr8 | 122154647 | 122154747 |
| chr9 | 21796208 | 21796508 | chr8 | 122650337 | 122651037 |
| chr9 | 21847539 | 21847639 | chr8 | 122795705 | 122795905 |
| chr9 | 21847788 | 21847888 | chr8 | 122796154 | 122796254 |
| chr9 | 21849239 | 21849688 | chr8 | 122829526 | 122829626 |
| chr9 | 21862623 | 21862923 | chr8 | 122830375 | 122831094 |
| chr9 | 21930648 | 21930848 | chr8 | 122897898 | 122898647 |
| chr9 | 21931597 | 21931697 | chr8 | 123244596 | 123244896 |
| chr9 | 21989540 | 21990140 | chr8 | 123269990 | 123270290 |
| chr9 | 21990889 | 21990989 | chr8 | 123278005 | 123278105 |
| chr9 | 22084240 | 22084689 | chr8 | 123289789 | 123290238 |
| chr9 | 24483838 | 24484138 | chr8 | 123703277 | 123703589 |
| chr9 | 25345476 | 25345769 | chr8 | 123752190 | 123752290 |
| chr9 | 26617185 | 26617285 | chr8 | 123991341 | 123991441 |
| chr9 | 26896098 | 26896247 | chr8 | 124068855 | 124069055 |
| chr9 | 30935406 | 30935560 | chr8 | 124069304 | 124069604 |
| chr9 | 30998253 | 30998353 | chr8 | 124106693 | 124106893 |
| chr9 | 31077769 | 31077969 | chr8 | 124538126 | 124538226 |
| chr9 | 31329592 | 31330092 | chr8 | 124622102 | 124622202 |
| chr9 | 32209342 | 32209491 | chr8 | 124638851 | 124639002 |
| chr9 | 32258338 | 32258538 | chr8 | 124729425 | 124729525 |
| chr9 | 34354429 | 34354529 | chr8 | 124738070 | 124738470 |
| chr9 | 34981809 | 34982009 | chr8 | 124773061 | 124773161 |
| chr9 | 34982558 | 34982658 | chr8 | 124774461 | 124774561 |
| chr9 | 35041786 | 35042435 | chr8 | 124784545 | 124784804 |
| chr9 | 35077601 | 35077701 | chr8 | 124940445 | 124940645 |
| chr9 | 35077850 | 35078250 | chr8 | 125007824 | 125008475 |
| chr9 | 35134782 | 35135231 | chr8 | 125277468 | 125277617 |

|      |          |          |      |           |           |
|------|----------|----------|------|-----------|-----------|
| chr9 | 35315974 | 35316924 | chr8 | 125373190 | 125373690 |
| chr9 | 36662467 | 36662816 | chr8 | 125373748 | 125374048 |
| chr9 | 36698407 | 36698556 | chr8 | 125375999 | 125376097 |
| chr9 | 37232221 | 37232621 | chr8 | 125397419 | 125397568 |
| chr9 | 37295282 | 37295885 | chr8 | 125572224 | 125572273 |
| chr9 | 37354559 | 37354659 | chr8 | 125639412 | 125639861 |
| chr9 | 37403573 | 37404473 | chr8 | 125680764 | 125680913 |
| chr9 | 37418408 | 37418963 | chr8 | 125813638 | 125813798 |
| chr9 | 37595980 | 37596129 | chr8 | 125966947 | 125967096 |
| chr9 | 39858210 | 39858759 | chr8 | 126120035 | 126120135 |
| chr9 | 39887193 | 39887442 | chr8 | 126144881 | 126144981 |
| chr9 | 40133999 | 40134099 | chr8 | 126737120 | 126737220 |
| chr9 | 40320512 | 40320612 | chr8 | 126824828 | 126824879 |
| chr9 | 40550960 | 40551060 | chr8 | 126882049 | 126882398 |
| chr9 | 40665682 | 40665782 | chr8 | 127024803 | 127025052 |
| chr9 | 41990684 | 41990784 | chr8 | 127059864 | 127059964 |
| chr9 | 42266957 | 42267049 | chr8 | 127215253 | 127216004 |
| chr9 | 42970557 | 42970757 | chr8 | 127830575 | 127830775 |
| chr9 | 42982090 | 42982990 | chr8 | 128001360 | 128001760 |
| chr9 | 43071075 | 43071275 | chr8 | 128070763 | 128071263 |
| chr9 | 43608946 | 43609046 | chr8 | 128584586 | 128584686 |
| chr9 | 43950023 | 43950223 | chr8 | 129132689 | 129133138 |
| chr9 | 43950472 | 43950772 | chr8 | 129225554 | 129225654 |
| chr9 | 43972465 | 43972865 | chr8 | 129459317 | 129459769 |
| chr9 | 43978571 | 43978671 | chr8 | 131228583 | 131228683 |
| chr9 | 43999817 | 43999917 |      |           |           |
| chr9 | 44099166 | 44099266 |      |           |           |
| chr9 | 44116131 | 44116531 |      |           |           |
| chr9 | 44117731 | 44117931 |      |           |           |
| chr9 | 44153164 | 44153464 |      |           |           |
| chr9 | 44171147 | 44171750 |      |           |           |
| chr9 | 44172499 | 44172703 |      |           |           |
| chr9 | 44197985 | 44198185 |      |           |           |
| chr9 | 44198334 | 44198434 |      |           |           |
| chr9 | 44199486 | 44199886 |      |           |           |
| chr9 | 44261650 | 44262199 |      |           |           |
| chr9 | 44283975 | 44284075 |      |           |           |
| chr9 | 44320038 | 44320138 |      |           |           |
| chr9 | 44321417 | 44321721 |      |           |           |
| chr9 | 44363706 | 44364306 |      |           |           |
| chr9 | 44391492 | 44391592 |      |           |           |
| chr9 | 44469485 | 44469585 |      |           |           |
| chr9 | 44470334 | 44470434 |      |           |           |

|      |          |          |
|------|----------|----------|
| chr9 | 44633937 | 44634336 |
| chr9 | 44669522 | 44669971 |
| chr9 | 44847451 | 44847507 |
| chr9 | 44874810 | 44874910 |
| chr9 | 44876173 | 44876627 |
| chr9 | 44907327 | 44907576 |
| chr9 | 44942853 | 44943310 |
| chr9 | 44981200 | 44981400 |
| chr9 | 45135753 | 45136253 |
| chr9 | 45182370 | 45182919 |
| chr9 | 45235395 | 45235595 |
| chr9 | 45263588 | 45264337 |
| chr9 | 45268244 | 45268793 |
| chr9 | 45702315 | 45702403 |
| chr9 | 45772023 | 45772323 |
| chr9 | 45800869 | 45801018 |
| chr9 | 45801069 | 45801218 |
| chr9 | 46093880 | 46094329 |
| chr9 | 46106249 | 46106498 |
| chr9 | 46136336 | 46136586 |
| chr9 | 47395322 | 47395422 |
| chr9 | 47395771 | 47395971 |
| chr9 | 48024335 | 48024584 |
| chr9 | 48204618 | 48205267 |
| chr9 | 48359048 | 48359448 |
| chr9 | 48359997 | 48360197 |
| chr9 | 48469702 | 48469851 |
| chr9 | 48699824 | 48699924 |
| chr9 | 48849811 | 48850111 |
| chr9 | 48920109 | 48920358 |
| chr9 | 49349705 | 49349954 |
| chr9 | 49350805 | 49351305 |
| chr9 | 50358423 | 50358872 |
| chr9 | 50523509 | 50523809 |
| chr9 | 50614837 | 50615237 |
| chr9 | 50616286 | 50617986 |
| chr9 | 50632317 | 50632466 |
| chr9 | 50873302 | 50873402 |
| chr9 | 51075669 | 51076118 |
| chr9 | 51076569 | 51077818 |
| chr9 | 51629545 | 51629645 |
| chr9 | 52531464 | 52532113 |
| chr9 | 52532752 | 52532952 |

|      |          |          |
|------|----------|----------|
| chr9 | 52533401 | 52533501 |
| chr9 | 53236578 | 53237236 |
| chr9 | 53391237 | 53391337 |
| chr9 | 53667314 | 53667733 |
| chr9 | 53668482 | 53668583 |
| chr9 | 53669233 | 53669382 |
| chr9 | 54435660 | 54436060 |
| chr9 | 54759798 | 54759898 |
| chr9 | 54760248 | 54760447 |
| chr9 | 54761298 | 54761398 |
| chr9 | 54815059 | 54815208 |
| chr9 | 55939436 | 55939536 |
| chr9 | 55939685 | 55939785 |
| chr9 | 55987589 | 55987689 |
| chr9 | 56315571 | 56315671 |
| chr9 | 56749040 | 56749340 |
| chr9 | 56750640 | 56750740 |
| chr9 | 56761436 | 56761536 |
| chr9 | 56974207 | 56974307 |
| chr9 | 57418482 | 57418582 |
| chr9 | 57435205 | 57435454 |
| chr9 | 57503609 | 57503858 |
| chr9 | 57517738 | 57518038 |
| chr9 | 57542157 | 57542685 |
| chr9 | 57664086 | 57664986 |
| chr9 | 57734061 | 57734210 |
| chr9 | 57735361 | 57735461 |
| chr9 | 57735610 | 57735814 |
| chr9 | 57837411 | 57837511 |
| chr9 | 57999374 | 57999674 |
| chr9 | 58001374 | 58001632 |
| chr9 | 58026325 | 58027274 |
| chr9 | 58099692 | 58099941 |
| chr9 | 58100492 | 58101041 |
| chr9 | 58210711 | 58211212 |
| chr9 | 58452859 | 58452959 |
| chr9 | 58454110 | 58454310 |
| chr9 | 59424509 | 59424958 |
| chr9 | 59435974 | 59436223 |
| chr9 | 59476144 | 59476393 |
| chr9 | 59554064 | 59554264 |
| chr9 | 59576604 | 59576953 |
| chr9 | 59577653 | 59578004 |



|      |          |          |
|------|----------|----------|
| chr9 | 59848836 | 59849536 |
| chr9 | 60408392 | 60409097 |
| chr9 | 60692055 | 60692155 |
| chr9 | 61271028 | 61271728 |
| chr9 | 61924098 | 61924747 |
| chr9 | 62239396 | 62239496 |
| chr9 | 62708710 | 62708810 |
| chr9 | 62734594 | 62734794 |
| chr9 | 62735543 | 62736143 |
| chr9 | 62755611 | 62755962 |
| chr9 | 63656051 | 63656651 |
| chr9 | 63918778 | 63918878 |
| chr9 | 64150440 | 64150540 |
| chr9 | 64151289 | 64151389 |
| chr9 | 64708913 | 64709013 |
| chr9 | 64850815 | 64851064 |
| chr9 | 64919258 | 64919358 |
| chr9 | 64928765 | 64928921 |
| chr9 | 65110770 | 65111119 |
| chr9 | 65191931 | 65192131 |
| chr9 | 65242318 | 65242370 |
| chr9 | 65574097 | 65574497 |
| chr9 | 65966839 | 65967039 |
| chr9 | 66411784 | 66412735 |
| chr9 | 66610311 | 66610583 |
| chr9 | 66730976 | 66731076 |
| chr9 | 66731725 | 66731825 |
| chr9 | 66872003 | 66873154 |
| chr9 | 66873503 | 66873703 |
| chr9 | 69348832 | 69348983 |
| chr9 | 69349232 | 69349932 |
| chr9 | 69657477 | 69657926 |
| chr9 | 69890896 | 69891645 |
| chr9 | 70037507 | 70037956 |
| chr9 | 70101899 | 70102848 |
| chr9 | 70553857 | 70553957 |
| chr9 | 70832223 | 70832474 |
| chr9 | 72429086 | 72429286 |
| chr9 | 72857225 | 72857674 |
| chr9 | 72937681 | 72938330 |
| chr9 | 74947330 | 74947531 |
| chr9 | 74980606 | 74980706 |
| chr9 | 74981255 | 74981355 |

|      |          |          |
|------|----------|----------|
| chr9 | 75220248 | 75221099 |
| chr9 | 75221448 | 75221548 |
| chr9 | 75223346 | 75223846 |
| chr9 | 75318864 | 75319064 |
| chr9 | 75470897 | 75471246 |
| chr9 | 75520779 | 75520879 |
| chr9 | 75533945 | 75534245 |
| chr9 | 75535045 | 75535245 |
| chr9 | 75925030 | 75925130 |
| chr9 | 77545452 | 77545952 |
| chr9 | 77546109 | 77546401 |
| chr9 | 77665026 | 77665126 |
| chr9 | 78023438 | 78023587 |
| chr9 | 78288267 | 78288367 |
| chr9 | 78306137 | 78306837 |
| chr9 | 78307442 | 78308046 |
| chr9 | 78358149 | 78358349 |
| chr9 | 78391879 | 78391979 |
| chr9 | 78497557 | 78498006 |
| chr9 | 79629095 | 79629195 |
| chr9 | 79629945 | 79630345 |
| chr9 | 79975281 | 79975381 |
| chr9 | 82820098 | 82820298 |
| chr9 | 83825185 | 83825485 |
| chr9 | 86562797 | 86562897 |
| chr9 | 88474691 | 88474791 |
| chr9 | 89696723 | 89696923 |
| chr9 | 89901606 | 89901906 |
| chr9 | 90106694 | 90106894 |
| chr9 | 90154027 | 90154627 |
| chr9 | 90155076 | 90155376 |
| chr9 | 90262301 | 90262401 |
| chr9 | 91358215 | 91358464 |
| chr9 | 95399257 | 95399357 |
| chr9 | 95503631 | 95503731 |
| chr9 | 96431124 | 96431573 |
| chr9 | 96724115 | 96724717 |
| chr9 | 96744913 | 96745513 |
| chr9 | 96745863 | 96746162 |
| chr9 | 96880408 | 96880708 |
| chr9 | 98414346 | 98414795 |
| chr9 | 98894496 | 98894696 |
| chr9 | 98946546 | 98946646 |

|      |           |           |
|------|-----------|-----------|
| chr9 | 98977558  | 98977658  |
| chr9 | 99621280  | 99621529  |
| chr9 | 100457861 | 100457961 |
| chr9 | 100458110 | 100459661 |
| chr9 | 102668743 | 102668892 |
| chr9 | 102955378 | 102955583 |
| chr9 | 103149375 | 103149924 |
| chr9 | 103176496 | 103176845 |
| chr9 | 103178496 | 103178745 |
| chr9 | 103312197 | 103312297 |
| chr9 | 103948918 | 103949018 |
| chr9 | 104073298 | 104073497 |
| chr9 | 105078414 | 105078614 |
| chr9 | 105079965 | 105080316 |
| chr9 | 105091691 | 105092091 |
| chr9 | 105756008 | 105756108 |
| chr9 | 106149449 | 106149549 |
| chr9 | 106195066 | 106195817 |
| chr9 | 106385097 | 106385346 |
| chr9 | 106399999 | 106400050 |
| chr9 | 106421969 | 106422118 |
| chr9 | 106423869 | 106424869 |
| chr9 | 106508286 | 106508386 |
| chr9 | 106509135 | 106510139 |
| chr9 | 106736652 | 106736901 |
| chr9 | 107241249 | 107241498 |
| chr9 | 107344172 | 107344521 |
| chr9 | 107345974 | 107346074 |
| chr9 | 107488036 | 107488136 |
| chr9 | 107492219 | 107492320 |
| chr9 | 107493220 | 107493620 |
| chr9 | 107508467 | 107508564 |
| chr9 | 107525377 | 107525777 |
| chr9 | 107534114 | 107534663 |
| chr9 | 107553112 | 107553612 |
| chr9 | 107615635 | 107615884 |
| chr9 | 107658336 | 107658685 |
| chr9 | 107874829 | 107875478 |
| chr9 | 107880480 | 107880529 |
| chr9 | 107895523 | 107896023 |
| chr9 | 107921069 | 107921418 |
| chr9 | 107931940 | 107932140 |
| chr9 | 107999068 | 107999168 |

|      |           |           |
|------|-----------|-----------|
| chr9 | 108024964 | 108025513 |
| chr9 | 108026013 | 108026213 |
| chr9 | 108136319 | 108136419 |
| chr9 | 108137174 | 108137979 |
| chr9 | 108242440 | 108242591 |
| chr9 | 108338492 | 108339192 |
| chr9 | 108425204 | 108425304 |
| chr9 | 108425553 | 108425753 |
| chr9 | 108426504 | 108426704 |
| chr9 | 108514865 | 108515065 |
| chr9 | 108516465 | 108516614 |
| chr9 | 108525727 | 108526176 |
| chr9 | 108526627 | 108526876 |
| chr9 | 108608236 | 108608888 |
| chr9 | 108741532 | 108741732 |
| chr9 | 108743232 | 108743332 |
| chr9 | 108900546 | 108900948 |
| chr9 | 108939016 | 108939465 |
| chr9 | 108986048 | 108986193 |
| chr9 | 108986342 | 108986642 |
| chr9 | 109000781 | 109001181 |
| chr9 | 109007273 | 109007873 |
| chr9 | 109008722 | 109008822 |
| chr9 | 109021233 | 109021733 |
| chr9 | 109796661 | 109797010 |
| chr9 | 109891289 | 109891389 |
| chr9 | 110205540 | 110205640 |
| chr9 | 110293196 | 110293296 |
| chr9 | 110380311 | 110380411 |
| chr9 | 110438416 | 110438665 |
| chr9 | 110586434 | 110586534 |
| chr9 | 110614994 | 110615243 |
| chr9 | 110723333 | 110723540 |
| chr9 | 110758024 | 110758124 |
| chr9 | 110773718 | 110774077 |
| chr9 | 110785481 | 110785634 |
| chr9 | 110786581 | 110787181 |
| chr9 | 110804458 | 110804858 |
| chr9 | 110816258 | 110816907 |
| chr9 | 110818058 | 110818158 |
| chr9 | 110838965 | 110839865 |
| chr9 | 110840614 | 110841665 |
| chr9 | 110905859 | 110906059 |

|      |           |           |
|------|-----------|-----------|
| chr9 | 110911243 | 110911743 |
| chr9 | 111398704 | 111399204 |
| chr9 | 112147645 | 112147794 |
| chr9 | 112148245 | 112148494 |
| chr9 | 113781323 | 113781485 |
| chr9 | 113781623 | 113782372 |
| chr9 | 114360157 | 114360257 |
| chr9 | 114465584 | 114465984 |
| chr9 | 114466133 | 114466433 |
| chr9 | 114751416 | 114751616 |
| chr9 | 114813939 | 114814139 |
| chr9 | 114904414 | 114904514 |
| chr9 | 115036598 | 115036695 |
| chr9 | 116145775 | 116146541 |
| chr9 | 118009529 | 118009629 |
| chr9 | 118575646 | 118575946 |
| chr9 | 118895090 | 118895790 |
| chr9 | 119021339 | 119021939 |
| chr9 | 119064683 | 119064783 |
| chr9 | 119161331 | 119161880 |
| chr9 | 119178673 | 119179246 |
| chr9 | 119200613 | 119200913 |
| chr9 | 119310731 | 119311231 |
| chr9 | 119325018 | 119325169 |
| chr9 | 119371538 | 119371638 |
| chr9 | 119549403 | 119549603 |
| chr9 | 119795254 | 119795347 |
| chr9 | 119907143 | 119907792 |
| chr9 | 119953696 | 119953796 |
| chr9 | 119954245 | 119954645 |
| chr9 | 120078236 | 120078485 |
| chr9 | 120105716 | 120105916 |
| chr9 | 120119036 | 120119079 |
| chr9 | 120461978 | 120462078 |
| chr9 | 120509380 | 120509480 |
| chr9 | 121078363 | 121078563 |
| chr9 | 121465900 | 121466100 |
| chr9 | 121466453 | 121466749 |
| chr9 | 121673997 | 121674297 |
| chr9 | 121677926 | 121678575 |
| chr9 | 121762271 | 121762771 |
| chr9 | 121827620 | 121827820 |
| chr9 | 121867701 | 121867901 |

|      |           |           |
|------|-----------|-----------|
| chr9 | 121885678 | 121885879 |
| chr9 | 121920471 | 121921071 |
| chr9 | 121965013 | 121965162 |
| chr9 | 122100139 | 122100788 |
| chr9 | 122264262 | 122264362 |
| chr9 | 123082230 | 123082779 |
| chr9 | 123119586 | 123119735 |
| chr8 | 3155403   | 3155703   |
| chr8 | 3156052   | 3156152   |
| chr8 | 3280631   | 3280727   |
| chr8 | 3625082   | 3625838   |
| chr8 | 3629949   | 3630206   |
| chr8 | 3654788   | 3655137   |
| chr8 | 3655988   | 3656237   |
| chr8 | 3926298   | 3926398   |
| chr8 | 3926547   | 3926747   |
| chr8 | 4216961   | 4217212   |
| chr8 | 4217361   | 4217961   |
| chr8 | 4236989   | 4237189   |
| chr8 | 4253201   | 4253301   |
| chr8 | 4325255   | 4325355   |
| chr8 | 4347763   | 4348564   |
| chr8 | 4493652   | 4493952   |
| chr8 | 9770651   | 9771351   |
| chr8 | 9772100   | 9772600   |
| chr8 | 10005109  | 10005619  |
| chr8 | 10153838  | 10153938  |
| chr8 | 11479350  | 11479999  |
| chr8 | 11497878  | 11498082  |
| chr8 | 11555293  | 11556093  |
| chr8 | 11636466  | 11636969  |
| chr8 | 11678678  | 11679027  |
| chr8 | 11758174  | 11758274  |
| chr8 | 11840597  | 11840697  |
| chr8 | 12279046  | 12279295  |
| chr8 | 12672272  | 12672572  |
| chr8 | 13024368  | 13024717  |
| chr8 | 13061095  | 13061307  |
| chr8 | 13159301  | 13159401  |
| chr8 | 13339445  | 13339545  |
| chr8 | 13403303  | 13403403  |
| chr8 | 13403552  | 13403603  |
| chr8 | 13494278  | 13494478  |

|             |          |          |
|-------------|----------|----------|
| chr8        | 13562428 | 13564177 |
| chr8        | 13677095 | 13677395 |
| chr8        | 13838051 | 13838451 |
| chr8        | 13907933 | 13908033 |
| chr8        | 15046441 | 15046541 |
| chr8        | 18846326 | 18846426 |
| chr8        | 18950582 | 18950931 |
| chr8_random | 841085   | 841385   |
| chr8        | 22882052 | 22882152 |
| chr8        | 22948158 | 22948458 |
| chr8        | 22948607 | 22948707 |
| chr8        | 23153908 | 23154008 |
| chr8        | 23231129 | 23231980 |
| chr8        | 23348657 | 23348757 |
| chr8        | 23349406 | 23349506 |
| chr8        | 24425291 | 24425440 |
| chr8        | 24928302 | 24929161 |
| chr8        | 25333535 | 25333684 |
| chr8        | 25430401 | 25431001 |
| chr8        | 25480724 | 25481073 |
| chr8        | 25704541 | 25704736 |
| chr8        | 25705687 | 25706047 |
| chr8        | 25858780 | 25859022 |
| chr8        | 26287379 | 26287479 |
| chr8        | 26352695 | 26352895 |
| chr8        | 26540408 | 26540508 |
| chr8        | 26563611 | 26563711 |
| chr8        | 26701381 | 26701481 |
| chr8        | 26703383 | 26703732 |
| chr8        | 26749225 | 26749574 |
| chr8        | 26770749 | 26771150 |
| chr8        | 26874219 | 26874319 |
| chr8        | 27796552 | 27796952 |
| chr8        | 27797108 | 27797401 |
| chr8        | 27797956 | 27798505 |
| chr8        | 27958308 | 27958504 |
| chr8        | 27959055 | 27959204 |
| chr8        | 27985496 | 27985645 |
| chr8        | 28202477 | 28202577 |
| chr8        | 31866854 | 31867054 |
| chr8        | 31867203 | 31867303 |
| chr8        | 34140333 | 34140533 |
| chr8        | 34854444 | 34854593 |

|      |          |          |
|------|----------|----------|
| chr8 | 34860178 | 34860327 |
| chr8 | 35463300 | 35463449 |
| chr8 | 35622781 | 35623130 |
| chr8 | 36483735 | 36483835 |
| chr8 | 39836556 | 39837308 |
| chr8 | 41095305 | 41095405 |
| chr8 | 41183217 | 41183317 |
| chr8 | 41306177 | 41306526 |
| chr8 | 41726485 | 41726637 |
| chr8 | 41755242 | 41755842 |
| chr8 | 41756794 | 41756991 |
| chr8 | 41888347 | 41888503 |
| chr8 | 43978551 | 43978851 |
| chr8 | 45740900 | 45741561 |
| chr8 | 45933722 | 45934371 |
| chr8 | 46882870 | 46882970 |
| chr8 | 46883921 | 46884080 |
| chr8 | 47287539 | 47288095 |
| chr8 | 47289588 | 47289688 |
| chr8 | 48347698 | 48347798 |
| chr8 | 48662791 | 48663228 |
| chr8 | 48781487 | 48782336 |
| chr8 | 55222339 | 55222488 |
| chr8 | 55272791 | 55273040 |
| chr8 | 55626052 | 55626209 |
| chr8 | 58359647 | 58359800 |
| chr8 | 59521392 | 59521942 |
| chr8 | 65016647 | 65017196 |
| chr8 | 66270895 | 66271044 |
| chr8 | 66798680 | 66798829 |
| chr8 | 66800080 | 66800829 |
| chr8 | 66845916 | 66846567 |
| chr8 | 67128770 | 67129070 |
| chr8 | 68806852 | 68806952 |
| chr8 | 69483627 | 69484027 |
| chr8 | 69484377 | 69484498 |
| chr8 | 69641862 | 69642162 |
| chr8 | 70853792 | 70853892 |
| chr8 | 70998111 | 70998317 |
| chr8 | 71259511 | 71259911 |
| chr8 | 71909958 | 71910158 |
| chr8 | 71939886 | 71940086 |
| chr8 | 71940737 | 71941137 |



|      |          |          |
|------|----------|----------|
| chr8 | 71951021 | 71951221 |
| chr8 | 72115422 | 72115722 |
| chr8 | 72190240 | 72190489 |
| chr8 | 72191340 | 72191740 |
| chr8 | 72191989 | 72192189 |
| chr8 | 72202586 | 72202786 |
| chr8 | 72330965 | 72331214 |
| chr8 | 72352841 | 72352941 |
| chr8 | 72434095 | 72434695 |
| chr8 | 72440304 | 72440355 |
| chr8 | 72440604 | 72440955 |
| chr8 | 72490366 | 72491015 |
| chr8 | 72492466 | 72492815 |
| chr8 | 72595952 | 72596301 |
| chr8 | 72605667 | 72606367 |
| chr8 | 72611364 | 72611664 |
| chr8 | 72625497 | 72625597 |
| chr8 | 72626548 | 72626748 |
| chr8 | 72629327 | 72629427 |
| chr8 | 72646484 | 72646884 |
| chr8 | 72648275 | 72648524 |
| chr8 | 72711289 | 72711489 |
| chr8 | 72712343 | 72713094 |
| chr8 | 72727131 | 72727331 |
| chr8 | 72735935 | 72736035 |
| chr8 | 72750951 | 72751802 |
| chr8 | 72752351 | 72752651 |
| chr8 | 72777990 | 72778090 |
| chr8 | 72779491 | 72780240 |
| chr8 | 72817157 | 72817657 |
| chr8 | 72841980 | 72843180 |
| chr8 | 72886358 | 72886758 |
| chr8 | 72895190 | 72895290 |
| chr8 | 72897190 | 72897439 |
| chr8 | 72975943 | 72976243 |
| chr8 | 72980135 | 72981584 |
| chr8 | 72982284 | 72982384 |
| chr8 | 72993548 | 72994048 |
| chr8 | 73024695 | 73024795 |
| chr8 | 73486434 | 73486583 |
| chr8 | 73514725 | 73514825 |
| chr8 | 73515876 | 73516525 |
| chr8 | 73581882 | 73582082 |

|      |          |          |
|------|----------|----------|
| chr8 | 73582231 | 73582531 |
| chr8 | 73583682 | 73583782 |
| chr8 | 73605965 | 73606065 |
| chr8 | 73630040 | 73630240 |
| chr8 | 73661750 | 73661950 |
| chr8 | 73687510 | 73688059 |
| chr8 | 73795390 | 73795739 |
| chr8 | 73820257 | 73820408 |
| chr8 | 73821508 | 73821657 |
| chr8 | 73843955 | 73844055 |
| chr8 | 74040072 | 74040521 |
| chr8 | 74218270 | 74218919 |
| chr8 | 74228476 | 74228725 |
| chr8 | 74437742 | 74437842 |
| chr8 | 74437991 | 74438291 |
| chr8 | 74540418 | 74540518 |
| chr8 | 74562783 | 74563534 |
| chr8 | 74594093 | 74594293 |
| chr8 | 74842265 | 74842365 |
| chr8 | 74880688 | 74880837 |
| chr8 | 79669660 | 79669860 |
| chr8 | 81551243 | 81551343 |
| chr8 | 82209468 | 82209668 |
| chr8 | 83167007 | 83167107 |
| chr8 | 85013855 | 85014065 |
| chr8 | 85015755 | 85015855 |
| chr8 | 85322544 | 85323493 |
| chr8 | 85446411 | 85446903 |
| chr8 | 85490267 | 85490367 |
| chr8 | 85599762 | 85599862 |
| chr8 | 85723808 | 85724408 |
| chr8 | 85764285 | 85764434 |
| chr8 | 85810473 | 85810822 |
| chr8 | 85898662 | 85898862 |
| chr8 | 85899711 | 85900111 |
| chr8 | 85900262 | 85900362 |
| chr8 | 86129880 | 86130080 |
| chr8 | 86200117 | 86200317 |
| chr8 | 86224388 | 86224737 |
| chr8 | 86225792 | 86226043 |
| chr8 | 86261966 | 86262217 |
| chr8 | 86282081 | 86282430 |
| chr8 | 86283081 | 86283581 |

|      |          |          |
|------|----------|----------|
| chr8 | 86333945 | 86334394 |
| chr8 | 86429162 | 86429911 |
| chr8 | 86571958 | 86572058 |
| chr8 | 86572507 | 86573023 |
| chr8 | 86845719 | 86845819 |
| chr8 | 86859436 | 86859685 |
| chr8 | 86958082 | 86958882 |
| chr8 | 86981616 | 86981816 |
| chr8 | 87004060 | 87004160 |
| chr8 | 87029703 | 87030168 |
| chr8 | 87064516 | 87065465 |
| chr8 | 87127128 | 87127477 |
| chr8 | 87137741 | 87138090 |
| chr8 | 87147211 | 87147360 |
| chr8 | 87229349 | 87229449 |
| chr8 | 87238955 | 87239904 |
| chr8 | 87522766 | 87522866 |
| chr8 | 87713013 | 87713113 |
| chr8 | 88723983 | 88724183 |
| chr8 | 88725034 | 88725132 |
| chr8 | 88781499 | 88781699 |
| chr8 | 88781948 | 88782248 |
| chr8 | 88903976 | 88904076 |
| chr8 | 90116888 | 90117188 |
| chr8 | 90445817 | 90446017 |
| chr8 | 90446568 | 90446817 |
| chr8 | 91201686 | 91201886 |
| chr8 | 92986129 | 92986878 |
| chr8 | 93956507 | 93957307 |
| chr8 | 93960213 | 93960962 |
| chr8 | 94832471 | 94833220 |
| chr8 | 95012519 | 95012668 |
| chr8 | 95014019 | 95014219 |
| chr8 | 95118199 | 95118348 |
| chr8 | 95118399 | 95118949 |
| chr8 | 95968891 | 95968991 |
| chr8 | 96294442 | 96294591 |
| chr8 | 96310219 | 96310368 |
| chr8 | 96372071 | 96372371 |
| chr8 | 96543270 | 96543470 |
| chr8 | 96544019 | 96544870 |
| chr8 | 96592337 | 96592437 |
| chr8 | 96683286 | 96684186 |

|      |           |           |
|------|-----------|-----------|
| chr8 | 96904109  | 96904209  |
| chr8 | 96930857  | 96931057  |
| chr8 | 97016175  | 97016624  |
| chr8 | 97076226  | 97076326  |
| chr8 | 97142773  | 97142922  |
| chr8 | 97142973  | 97143622  |
| chr8 | 97174702  | 97174951  |
| chr8 | 97301960  | 97302160  |
| chr8 | 97466056  | 97466805  |
| chr8 | 97468185  | 97468334  |
| chr8 | 97510821  | 97510921  |
| chr8 | 97592963  | 97593412  |
| chr8 | 97648161  | 97648261  |
| chr8 | 97691670  | 97691819  |
| chr8 | 97692679  | 97693028  |
| chr8 | 97860882  | 97861682  |
| chr8 | 97861933  | 97862082  |
| chr8 | 97872783  | 97873032  |
| chr8 | 98046536  | 98046736  |
| chr8 | 101575473 | 101575573 |
| chr8 | 106452294 | 106452494 |
| chr8 | 106469506 | 106469903 |
| chr8 | 106498064 | 106498565 |
| chr8 | 106554516 | 106554616 |
| chr8 | 106698477 | 106698677 |
| chr8 | 106749642 | 106750042 |
| chr8 | 106789335 | 106790035 |
| chr8 | 107289019 | 107290119 |
| chr8 | 107414424 | 107415273 |
| chr8 | 107415424 | 107415675 |
| chr8 | 107433717 | 107434066 |
| chr8 | 107448322 | 107448922 |
| chr8 | 107454518 | 107454618 |
| chr8 | 107462279 | 107462879 |
| chr8 | 107463028 | 107464179 |
| chr8 | 107484897 | 107484997 |
| chr8 | 107485848 | 107486148 |
| chr8 | 107486297 | 107486700 |
| chr8 | 107571658 | 107572207 |
| chr8 | 107631889 | 107631989 |
| chr8 | 107676624 | 107677424 |
| chr8 | 107725511 | 107725960 |
| chr8 | 107859602 | 107860453 |

|      |           |           |
|------|-----------|-----------|
| chr8 | 107867441 | 107867641 |
| chr8 | 107917027 | 107917127 |
| chr8 | 108019204 | 108019304 |
| chr8 | 108050489 | 108051389 |
| chr8 | 108051440 | 108052540 |
| chr8 | 108124210 | 108124310 |
| chr8 | 108124559 | 108124759 |
| chr8 | 108155894 | 108156243 |
| chr8 | 108169853 | 108170053 |
| chr8 | 108218154 | 108218254 |
| chr8 | 108574051 | 108574500 |
| chr8 | 108669912 | 108670012 |
| chr8 | 108760787 | 108761287 |
| chr8 | 108761538 | 108761638 |
| chr8 | 109052413 | 109052713 |
| chr8 | 109215996 | 109216096 |
| chr8 | 109217151 | 109217251 |
| chr8 | 109451232 | 109451732 |
| chr8 | 109583209 | 109584165 |
| chr8 | 109584909 | 109585458 |
| chr8 | 110872863 | 110873763 |
| chr8 | 111652146 | 111652349 |
| chr8 | 111766944 | 111767293 |
| chr8 | 111852084 | 111852184 |
| chr8 | 112147627 | 112148076 |
| chr8 | 112236974 | 112237074 |
| chr8 | 112237325 | 112237428 |
| chr8 | 112879754 | 112879854 |
| chr8 | 113117095 | 113117146 |
| chr8 | 113117295 | 113117395 |
| chr8 | 113194089 | 113194189 |
| chr8 | 113554440 | 113554540 |
| chr8 | 113791049 | 113791149 |
| chr8 | 113791849 | 113791998 |
| chr8 | 113904436 | 113904836 |
| chr8 | 114015286 | 114016137 |
| chr8 | 114016592 | 114016686 |
| chr8 | 114090103 | 114090461 |
| chr8 | 114154529 | 114155080 |
| chr8 | 114172558 | 114172758 |
| chr8 | 115797406 | 115797706 |
| chr8 | 116010415 | 116010815 |
| chr8 | 116011866 | 116012166 |

|      |           |           |
|------|-----------|-----------|
| chr8 | 116012521 | 116012615 |
| chr8 | 116579608 | 116579757 |
| chr8 | 118896229 | 118896329 |
| chr8 | 119081562 | 119082011 |
| chr8 | 119085062 | 119085222 |
| chr8 | 119155121 | 119155521 |
| chr8 | 119256687 | 119256787 |
| chr8 | 119257236 | 119257487 |
| chr8 | 119257836 | 119258136 |
| chr8 | 119660140 | 119660240 |
| chr8 | 119863607 | 119863707 |
| chr8 | 119864156 | 119864256 |
| chr8 | 119965152 | 119965305 |
| chr8 | 120443567 | 120444120 |
| chr8 | 120444906 | 120445455 |
| chr8 | 121607790 | 121607890 |
| chr8 | 121721750 | 121721850 |
| chr8 | 121736357 | 121736457 |
| chr8 | 121737006 | 121737106 |
| chr8 | 122002612 | 122002712 |
| chr8 | 122023641 | 122023941 |
| chr8 | 122152598 | 122152998 |
| chr8 | 122263344 | 122263444 |
| chr8 | 122305251 | 122305351 |
| chr8 | 122338992 | 122339092 |
| chr8 | 122649188 | 122649288 |
| chr8 | 123704938 | 123705238 |
| chr8 | 123740114 | 123740214 |
| chr8 | 123741163 | 123741763 |
| chr8 | 123815005 | 123815305 |
| chr8 | 123891485 | 123891785 |
| chr8 | 124079202 | 124079702 |
| chr8 | 124106144 | 124106644 |
| chr8 | 124108193 | 124108493 |
| chr8 | 124110419 | 124110768 |
| chr8 | 124112127 | 124112327 |
| chr8 | 124442648 | 124443148 |
| chr8 | 124521956 | 124522556 |
| chr8 | 124523105 | 124524205 |
| chr8 | 124581794 | 124581894 |
| chr8 | 124583094 | 124583394 |
| chr8 | 124594686 | 124595537 |
| chr8 | 124622851 | 124623502 |

|      |           |           |
|------|-----------|-----------|
| chr8 | 124639052 | 124639551 |
| chr8 | 124738819 | 124739719 |
| chr8 | 124773410 | 124773510 |
| chr8 | 124784345 | 124784494 |
| chr8 | 124785045 | 124785245 |
| chr8 | 125009024 | 125009224 |
| chr8 | 125225388 | 125225644 |
| chr8 | 125262125 | 125262774 |
| chr8 | 125278568 | 125279268 |
| chr8 | 125319478 | 125319627 |
| chr8 | 125347551 | 125347751 |
| chr8 | 125372890 | 125372941 |
| chr8 | 125494422 | 125494522 |
| chr8 | 125533762 | 125534019 |
| chr8 | 125535162 | 125535362 |
| chr8 | 125571873 | 125571973 |
| chr8 | 125572522 | 125572773 |
| chr8 | 125604846 | 125604897 |
| chr8 | 125676562 | 125676662 |
| chr8 | 125677111 | 125677211 |
| chr8 | 125815142 | 125815442 |
| chr8 | 126057946 | 126058095 |
| chr8 | 126120484 | 126122035 |
| chr8 | 126682136 | 126682385 |
| chr8 | 126731842 | 126731942 |
| chr8 | 126825328 | 126825428 |
| chr8 | 126884098 | 126884298 |
| chr8 | 127076990 | 127077190 |
| chr8 | 127077839 | 127077939 |
| chr8 | 128154879 | 128154928 |
| chr8 | 128156479 | 128156979 |
| chr8 | 128157228 | 128157328 |
| chr8 | 128459908 | 128460008 |
| chr8 | 128999342 | 129000391 |
| chr8 | 129107240 | 129107440 |
| chr8 | 129107589 | 129107889 |
| chr8 | 129461666 | 129461766 |
| chr8 | 130847290 | 130847490 |
| chr8 | 131226683 | 131226783 |
| chr8 | 131227232 | 131227432 |
| chr8 | 131229132 | 131229235 |
